# Supplementary material for: Bleomycin Sensitivity in Escherichia coli is Medium-Dependent
Source: PLoS One. 2012 Mar 15;7(3):e33256. doi: 10.1371/journal.pone.0033256 (PMC3305319; doi:10.1371/journal.pone.0033256)
Supplement: Table S2 — Gene Chip 2.0 values from GM7661 cells exposed or not to BLM in L broth and minimal medium. (XLSX) [file pone.0033256.s002.xlsx]

## Sheet: Sheet1
	GM7661 LB ON	M7661 LB ON	M7661 LB ON	GM7661 LB+BLM	GM7661 LB+BLM	GM7661 LB+BLM	GM7661 LB	GM7661 LB	GM7661 LB	GM7661 MS ON	GM7661 MS ON	GM7661 MS ON	GM7661 MS+BLM	GM7661 MS+BLM	GM7661 MS+BLM	GM7661 MS	GM7661 MS	GM7661 MS
	7MM_Signal	7MM_Detection	7MM_Detection p-value	8MM_Signal	8MM_Detection	8MM_Detection p-value	9MM_Signal	9MM_Detection	9MM_Detection p-value	10MM_Signal	10MM_Detection	10MM_Detection p-value	11MM_Signal	11MM_Detection	11MM_Detection p-value	12MM_Signal	12MM_Detection	12MM_Detection p-value	Descriptions
AFFX-BioB-5_at	114.7	P	0.000147	50.7	P	0.001796	60.3	P	0.001248	506.8	P	4.4e-05	378.7	P	7e-05	343.1	P	7e-05	E. coli GEN=bioB DB_XREF=gb:J04423.1 NOTE=SIF corresponding to nucleotides 2032-2305 of gb:J04423.1 DEF=E.coli 7,8-diamino-pelargonic acid (bioA), biotin synthetase (bioB), 7-keto-8-amino-pelargonic acid synthetase (bioF), bioC protein, and dethiobiotin synthetase (bioD), complete cds.
AFFX-BioB-M_at	171.6	P	6e-05	86.3	P	0.000581	94.9	P	0.00039	662.9	P	4.4e-05	462.2	P	4.4e-05	438.8	P	4.4e-05	E. coli GEN=bioB DB_XREF=gb:J04423.1 NOTE=SIF corresponding to nucleotides 2482-2739 of gb:J04423.1 DEF=E.coli 7,8-diamino-pelargonic acid (bioA), biotin synthetase (bioB), 7-keto-8-amino-pelargonic acid synthetase (bioF), bioC protein, and dethiobiotin synthetase (bioD), complete cds.
AFFX-BioB-3_at	139.2	P	0.000662	102.7	P	0.01667	100.7	P	0.026111	517.8	P	8.1e-05	401.7	P	0.000147	392.5	P	0.00011	E. coli GEN=bioB DB_XREF=gb:J04423.1 NOTE=SIF corresponding to nucleotides 2755-3052 of gb:J04423.1 DEF=E.coli 7,8-diamino-pelargonic acid (bioA), biotin synthetase (bioB), 7-keto-8-amino-pelargonic acid synthetase (bioF), bioC protein, and dethiobiotin synthetase (bioD), complete cds.
AFFX-BioC-5_at	59.9	P	0.000225	28.6	P	0.023929	40.5	P	0.039661	337.9	P	5.2e-05	345.7	P	7e-05	246.8	P	7e-05	E. coli GEN=bioC DB_XREF=gb:J04423.1 NOTE=SIF corresponding to nucleotides 4218-4566 of gb:J04423.1 DEF=E.coli 7,8-diamino-pelargonic acid (bioA), biotin synthetase (bioB), 7-keto-8-amino-pelargonic acid synthetase (bioF), bioC protein, and dethiobiotin synthetase (bioD), complete cds.
AFFX-BioC-3_at	48.2	P	0.000225	39	P	0.000857	35.6	P	0.002556	455.5	P	5.2e-05	365.4	P	6e-05	345.1	P	7e-05	E. coli GEN=bioC DB_XREF=gb:J04423.1 NOTE=SIF corresponding to nucleotides 4626-4878 of gb:J04423.1 DEF=E.coli 7,8-diamino-pelargonic acid (bioA), biotin synthetase (bioB), 7-keto-8-amino-pelargonic acid synthetase (bioF), bioC protein, and dethiobiotin synthetase (bioD), complete cds.
AFFX-BioDn-5_at	59.5	P	0.000225	39.4	P	0.00762	46.7	P	0.018281	512.8	P	5.2e-05	409.2	P	5.2e-05	376	P	5.2e-05	E. coli GEN=bioD DB_XREF=gb:J04423.1 NOTE=SIF corresponding to nucleotides 4980-5256 of gb:J04423.1, not 100% identical DEF=E.coli 7,8-diamino-pelargonic acid (bioA), biotin synthetase (bioB), 7-keto-8-amino-pelargonic acid synthetase (bioF), bioC protein, and dethiobiotin synthetase (bioD), complete cds.
AFFX-BioDn-3_at	107.4	P	0.002275	77.1	P	0.011384	107.1	P	0.01667	874.9	P	0.00034	707.1	P	0.000857	641.9	P	0.000857	E. coli GEN=bioD DB_XREF=gb:J04423.1 NOTE=SIF corresponding to nucleotides 5286-5570 of gb:J04423.1, not 100% identical DEF=E.coli 7,8-diamino-pelargonic acid (bioA), biotin synthetase (bioB), 7-keto-8-amino-pelargonic acid synthetase (bioF), bioC protein, and dethiobiotin synthetase (bioD), complete cds.
AFFX-CreX-5_at	1.1	A	0.712257	1	A	0.659339	0.9	A	0.60308	6.2	A	0.250796	8	A	0.147939	5.4	A	0.51489	Bacteriophage P1 GEN=cre DB_XREF=gb:X03453.1 NOTE=SIF corresponding to nucleotides 513-1047 of gb:X03453.1 DEF=Bacteriophage P1 cre gene for recombinase protein.
AFFX-CreX-3_at	1.1	A	0.984817	1.4	A	0.860518	1.5	A	0.945787	1	A	0.963431	0.9	A	0.988616	1.3	A	0.949771	Bacteriophage P1 GEN=cre DB_XREF=gb:X03453.1 NOTE=SIF corresponding to nucleotides 1089-1495 of gb:X03453.1 DEF=Bacteriophage P1 cre gene for recombinase protein.
AFFX-DapX-5_at	3803.6	P	4.4e-05	5899.1	P	4.4e-05	4830.3	P	4.4e-05	5062.3	P	4.4e-05	5439.2	P	4.4e-05	6194	P	4.4e-05	B. subtilis GEN=dapB DB_XREF=gb:L38424.1 NOTE=SIF corresponding to nucleotides 1428-1926 of gb:L38424.1 DEF=Bacillus subtilis dihydropicolinate reductase (jojE) gene, complete cds; poly(A) polymerase (jojI) gene, complete cds; biotin acetyl-CoA-carboxylase ligase (birA) gene, complete cds; jojC, jojD, jojF, jojG, jojH genes, complete cds s.
AFFX-DapX-M_at	4082.8	P	5.2e-05	6137.6	P	4.4e-05	5240.4	P	4.4e-05	5500.6	P	4.4e-05	5254	P	5.2e-05	6621.9	P	4.4e-05	B. subtilis GEN=dapB, jojF DB_XREF=gb:L38424.1 NOTE=SIF corresponding to nucleotides 2020-2580 of gb:L38424.1, not 100% identical DEF=Bacillus subtilis dihydropicolinate reductase (jojE) gene, complete cds; poly(A) polymerase (jojI) gene, complete cds; biotin acetyl-CoA-carboxylase ligase (birA) gene, complete cds; jojC, jojD, jojF, jojG, jojH genes, complete cds s.
AFFX-DapX-3_at	3279.6	P	4.4e-05	4988.7	P	4.4e-05	4414.8	P	4.4e-05	4545.7	P	4.4e-05	4590.9	P	4.4e-05	5300.3	P	4.4e-05	B. subtilis GEN=jojG DB_XREF=gb:L38424.1 NOTE=SIF corresponding to nucleotides 2684-3130 of gb:L38424.1 DEF=Bacillus subtilis dihydropicolinate reductase (jojE) gene, complete cds; poly(A) polymerase (jojI) gene, complete cds; biotin acetyl-CoA-carboxylase ligase (birA) gene, complete cds; jojC, jojD, jojF, jojG, jojH genes, complete cds s.
AFFX-LysX-5_at	585.1	P	4.4e-05	795.3	P	4.4e-05	619.9	P	4.4e-05	746	P	4.4e-05	741.7	P	4.4e-05	832.8	P	4.4e-05	B. subtilis GEN=lys DB_XREF=gb:X17013.1 NOTE=SIF corresponding to nucleotides 387-658 of gb:X17013.1, not 100% identical DEF=B subtilis lys gene for diaminopimelate decarboxylase (EC 4.1.1.20).
AFFX-LysX-M_at	436.3	P	4.4e-05	642.4	P	4.4e-05	535.1	P	9.5e-05	602	P	8.1e-05	580.8	P	4.4e-05	616.4	P	5.2e-05	B. subtilis GEN=lys DB_XREF=gb:X17013.1 NOTE=SIF corresponding to nucleotides 720-990 of gb:X17013.1, not 100% identical DEF=B subtilis lys gene for diaminopimelate decarboxylase (EC 4.1.1.20).
AFFX-LysX-3_at	407.6	P	4.4e-05	571.3	P	4.4e-05	594.9	P	5.2e-05	623.7	P	4.4e-05	758.1	P	4.4e-05	669.6	P	4.4e-05	B. subtilis GEN=lys DB_XREF=gb:X17013.1 NOTE=SIF corresponding to nucleotides 1061-1343 of gb:X17013.1, not 100% identical DEF=B subtilis lys gene for diaminopimelate decarboxylase (EC 4.1.1.20).
AFFX-PheX-5_at	1454	P	4.4e-05	2151.5	P	4.4e-05	2047.5	P	4.4e-05	1887.1	P	4.4e-05	2063.2	P	4.4e-05	2192.9	P	4.4e-05	B. subtilis GEN=pheA DB_XREF=gb:M24537.1 NOTE=SIF corresponding to nucleotides 2028-2375 of gb:M24537.1, not 100% identical DEF=Bacillus subtillis sporulation protein (spoOB), GTP-binding protein (obg), phenylalanine biosynthesis associated protein (pheB), and monofunctional prephenate dehydratase (pheA) genes, complete cds.
AFFX-PheX-M_at	1021.5	P	4.4e-05	1389.4	P	4.4e-05	1571.9	P	4.4e-05	1364.2	P	4.4e-05	1378.8	P	4.4e-05	1482.4	P	4.4e-05	B. subtilis GEN=pheA DB_XREF=gb:M24537.1 NOTE=SIF corresponding to nucleotides 2437-2828 of gb:M24537.1 DEF=Bacillus subtillis sporulation protein (spoOB), GTP-binding protein (obg), phenylalanine biosynthesis associated protein (pheB), and monofunctional prephenate dehydratase (pheA) genes, complete cds.
AFFX-PheX-3_at	714.2	P	4.4e-05	969.2	P	4.4e-05	786.6	P	4.4e-05	864.2	P	4.4e-05	901	P	4.4e-05	1046.9	P	4.4e-05	B. subtilis GEN=pheB DB_XREF=gb:M24537.1 NOTE=SIF corresponding to nucleotides 2885-3326 of gb:M24537.1, not 100% identical DEF=Bacillus subtillis sporulation protein (spoOB), GTP-binding protein (obg), phenylalanine biosynthesis associated protein (pheB), and monofunctional prephenate dehydratase (pheA) genes, complete cds.
AFFX-ThrX-5_at	2426.6	P	4.4e-05	3546.1	P	4.4e-05	2742.2	P	4.4e-05	2870.2	P	4.4e-05	3087.3	P	4.4e-05	3575	P	4.4e-05	B. subtilis GEN=thrC DB_XREF=gb:X04603.1 NOTE=SIF corresponding to nucleotides 288-932 of gb:X04603.1 DEF=B. subtilis thrB and thrC genes for homoserine kinase and threonine synthase (EC 2.7.1.39 and EC 4.2.99.2, respectively).
AFFX-ThrX-M_at	2190.9	P	4.4e-05	3423.6	P	4.4e-05	2791.3	P	4.4e-05	2868.2	P	4.4e-05	3151	P	4.4e-05	3633.5	P	4.4e-05	B. subtilis GEN=thrC, thrB DB_XREF=gb:X04603.1 NOTE=SIF corresponding to nucleotides 995-1562 of gb:X04603.1, not 100% identical DEF=B. subtilis thrB and thrC genes for homoserine kinase and threonine synthase (EC 2.7.1.39 and EC 4.2.99.2, respectively).
AFFX-ThrX-3_at	1834	P	4.4e-05	2546.1	P	4.4e-05	1971.8	P	4.4e-05	2234.1	P	4.4e-05	2436.8	P	4.4e-05	2508.8	P	4.4e-05	B. subtilis GEN=thrB DB_XREF=gb:X04603.1 NOTE=SIF corresponding to nucleotides 1689-2151 of gb:X04603.1 DEF=B. subtilis thrB and thrC genes for homoserine kinase and threonine synthase (EC 2.7.1.39 and EC 4.2.99.2, respectively).
AFFX-TrpnX-5_at	8.3	A	0.268933	10.9	A	0.340661	5.8	A	0.340661	11.2	M	0.058444	14.9	A	0.095667	14.3	A	0.175328	B. subtilis GEN=trpE, trpD DB_XREF=gb:K01391.1 NOTE=SIF corresponding to nucleotides 1953-2483 of gb:K01391.1, not 100% identical DEF=B.subtilis tryptophan (trp) operon, complete cds.
AFFX-TrpnX-M_at	7.2	A	0.083592	6	A	0.313723	9.2	A	0.165861	8.4	A	0.185131	7	A	0.165861	10.7	A	0.095648	B. subtilis GEN=trpD, trpC DB_XREF=gb:K01391.1 NOTE=SIF corresponding to nucleotides 2880-3359 of gb:K01391.1, not 100% identical DEF=B.subtilis tryptophan (trp) operon, complete cds.
AFFX-TrpnX-3_at	1.9	A	0.749204	0.4	A	0.963431	1.2	A	0.916408	1	A	0.760937	1.2	A	0.81489	1.2	A	0.834139	B. subtilis GEN=trpC, trpF DB_XREF=gb:K01391.1 NOTE=SIF corresponding to nucleotides 3790-4368 of gb:K01391.1, not 100% identical DEF=B.subtilis tryptophan (trp) operon, complete cds.
AFFX-r2-Ec-bioB-5_at	161.1	P	0.000244	41.3	P	0.000244	81	P	0.000732	789.1	P	0.000244	483.4	P	0.000244	460	P	0.000244	E. coli GEN=bioB DB_XREF=gb:J04423.1 NOTE=SIF corresponding to nucleotides 2071-2304 of gb:J04423.1 DEF=E.coli 7,8-diamino-pelargonic acid (bioA), biotin synthetase (bioB), 7-keto-8-amino-pelargonic acid synthetase (bioF), bioC protein, and dethiobiotin synthetase (bioD), complete cds.
AFFX-r2-Ec-bioB-M_at	226	P	0.001221	74.8	P	0.030273	95.2	P	0.023926	821	P	0.000244	509.1	P	0.000732	491.4	P	0.000732	E. coli GEN=bioB DB_XREF=gb:J04423.1 NOTE=SIF corresponding to nucleotides 2393-2682 of gb:J04423.1 DEF=E.coli 7,8-diamino-pelargonic acid (bioA), biotin synthetase (bioB), 7-keto-8-amino-pelargonic acid synthetase (bioF), bioC protein, and dethiobiotin synthetase (bioD), complete cds.
AFFX-r2-Ec-bioB-3_at	86.1	P	0.000244	40.1	P	0.018555	86.3	P	0.005859	409	P	0.000244	311.9	P	0.000244	255.1	P	0.000244	E. coli GEN=bioB DB_XREF=gb:J04423.1 NOTE=SIF corresponding to nucleotides 2772-3004 of gb:J04423.1 DEF=E.coli 7,8-diamino-pelargonic acid (bioA), biotin synthetase (bioB), 7-keto-8-amino-pelargonic acid synthetase (bioF), bioC protein, and dethiobiotin synthetase (bioD), complete cds.
AFFX-r2-Ec-bioC-5_at	72.9	P	0.000244	37.9	P	0.010742	41.6	P	0.001953	508.7	P	0.000244	399.8	P	0.000244	347.1	P	0.000244	E. coli GEN=bioC DB_XREF=gb:J04423.1 NOTE=SIF corresponding to nucleotides 4257-4573 of gb:J04423.1 DEF=E.coli 7,8-diamino-pelargonic acid (bioA), biotin synthetase (bioB), 7-keto-8-amino-pelargonic acid synthetase (bioF), bioC protein, and dethiobiotin synthetase (bioD), complete cds.
AFFX-r2-Ec-bioC-3_at	27.4	A	0.246094	25.3	A	0.27417	27.4	A	0.219482	540.2	P	0.00415	463	P	0.003662	402.6	P	0.018555	E. coli GEN=bioC DB_XREF=gb:J04423.1 NOTE=SIF corresponding to nucleotides 4608-4883 of gb:J04423.1 DEF=E.coli 7,8-diamino-pelargonic acid (bioA), biotin synthetase (bioB), 7-keto-8-amino-pelargonic acid synthetase (bioF), bioC protein, and dethiobiotin synthetase (bioD), complete cds.
AFFX-r2-Ec-bioD-5_at	44.5	P	0.000244	42.5	P	0.046143	43.7	P	0.00293	574.3	P	0.000244	391.7	P	0.000244	440.5	P	0.000244	E. coli GEN=bioD DB_XREF=gb:J04423.1 NOTE=SIF corresponding to nucleotides 5024-5244 of gb:J04423.1 DEF=E.coli 7,8-diamino-pelargonic acid (bioA), biotin synthetase (bioB), 7-keto-8-amino-pelargonic acid synthetase (bioF), bioC protein, and dethiobiotin synthetase (bioD), complete cds.
AFFX-r2-Ec-bioD-3_at	103	P	0.000244	57.5	P	0.000732	95.2	P	0.000732	1230.3	P	0.000244	833.3	P	0.000244	828.7	P	0.000244	E. coli GEN=bioD DB_XREF=gb:J04423.1 NOTE=SIF corresponding to nucleotides 5312-5559 of gb:J04423.1, not 100% identical DEF=E.coli 7,8-diamino-pelargonic acid (bioA), biotin synthetase (bioB), 7-keto-8-amino-pelargonic acid synthetase (bioF), bioC protein, and dethiobiotin synthetase (bioD), complete cds.
AFFX-r2-P1-cre-5_at	1.9	A	0.358154	0.7	A	0.943848	1.8	A	0.753906	1	A	0.828613	0.6	A	0.919434	2.2	A	0.601074	Bacteriophage P1 GEN=cre DB_XREF=gb:X03453.1 NOTE=SIF corresponding to nucleotides 581-1001 of gb:X03453.1 DEF=Bacteriophage P1 cre gene for recombinase protein.
AFFX-r2-P1-cre-3_at	7.1	A	0.5	2	A	0.466064	1.4	A	0.601074	8.9	A	0.303711	2.5	A	0.601074	2.3	A	0.665527	Bacteriophage P1 GEN=cre DB_XREF=gb:X03453.1 NOTE=SIF corresponding to nucleotides 1032-1270 of gb:X03453.1 DEF=Bacteriophage P1 cre gene for recombinase protein.
AFFX-r2-Bs-dap-5_at	6061.9	P	0.000244	7966.3	P	0.000244	7081.6	P	0.000244	7683.6	P	0.000244	8959.3	P	0.000244	9469.5	P	0.000244	B. subtilis GEN=dapB DB_XREF=gb:L38424.1 NOTE=SIF corresponding to nucleotides 1439-1846 of gb:L38424.1 DEF=Bacillus subtilis dihydropicolinate reductase (jojE) gene, complete cds; poly(A) polymerase (jojI) gene, complete cds; biotin acetyl-CoA-carboxylase ligase (birA) gene, complete cds; jojC, jojD, jojF, jojG, jojH genes, complete cds s.
AFFX-r2-Bs-dap-M_at	4914.8	P	0.000244	7872.8	P	0.000244	6459.1	P	0.000244	6190	P	0.000244	7059.6	P	0.000244	8315	P	0.000244	B. subtilis GEN=dapB, jojF DB_XREF=gb:L38424.1 NOTE=SIF corresponding to nucleotides 2055-2578 of gb:L38424.1, not 100% identical DEF=Bacillus subtilis dihydropicolinate reductase (jojE) gene, complete cds; poly(A) polymerase (jojI) gene, complete cds; biotin acetyl-CoA-carboxylase ligase (birA) gene, complete cds; jojC, jojD, jojF, jojG, jojH genes, complete cds s.
AFFX-r2-Bs-dap-3_at	4164.3	P	0.000244	6248.7	P	0.000244	5541.2	P	0.000244	5692.9	P	0.000244	5203.3	P	0.000244	5861.5	P	0.000244	B. subtilis GEN=jojG DB_XREF=gb:L38424.1 NOTE=SIF corresponding to nucleotides 2634-3089 of gb:L38424.1 DEF=Bacillus subtilis dihydropicolinate reductase (jojE) gene, complete cds; poly(A) polymerase (jojI) gene, complete cds; biotin acetyl-CoA-carboxylase ligase (birA) gene, complete cds; jojC, jojD, jojF, jojG, jojH genes, complete cds s.
AFFX-r2-Bs-lys-5_at	560.7	P	0.000244	750	P	0.000244	734.7	P	0.000244	941.7	P	0.000244	855.4	P	0.000244	850.5	P	0.000244	B. subtilis GEN=lys DB_XREF=gb:X17013.1 NOTE=SIF corresponding to nucleotides 411-659 of gb:X17013.1, not 100% identical DEF=B subtilis lys gene for diaminopimelate decarboxylase (EC 4.1.1.20).
AFFX-r2-Bs-lys-M_at	701.8	P	0.000244	825.4	P	0.000244	1018.1	P	0.000244	1018.9	P	0.000244	941.4	P	0.000244	896.4	P	0.000244	B. subtilis GEN=lys DB_XREF=gb:X17013.1 NOTE=SIF corresponding to nucleotides 673-1002 of gb:X17013.1, not 100% identical DEF=B subtilis lys gene for diaminopimelate decarboxylase (EC 4.1.1.20).
AFFX-r2-Bs-lys-3_at	587.3	P	0.000244	906.1	P	0.000244	741	P	0.000244	758.5	P	0.000244	856.5	P	0.000244	792.7	P	0.000244	B. subtilis GEN=lys DB_XREF=gb:X17013.1 NOTE=SIF corresponding to nucleotides 1008-1263 of gb:X17013.1, not 100% identical DEF=B subtilis lys gene for diaminopimelate decarboxylase (EC 4.1.1.20).
AFFX-r2-Bs-phe-5_at	872.7	P	0.000244	1356.6	P	0.000244	1536.1	P	0.000244	1149	P	0.000244	1429.1	P	0.000244	1480.4	P	0.000244	B. subtilis GEN=pheA DB_XREF=gb:M24537.1 NOTE=SIF corresponding to nucleotides 2116-2382 of gb:M24537.1 DEF=Bacillus subtillis sporulation protein (spoOB), GTP-binding protein (obg), phenylalanine biosynthesis associated protein (pheB), and monofunctional prephenate dehydratase (pheA) genes, complete cds.
AFFX-r2-Bs-phe-M_at	790.2	P	0.000244	1080.4	P	0.000244	1025	P	0.000244	1010.5	P	0.000244	1128.4	P	0.000244	1094.5	P	0.000244	B. subtilis GEN=pheA DB_XREF=gb:M24537.1 NOTE=SIF corresponding to nucleotides 2484-2875 of gb:M24537.1 DEF=Bacillus subtillis sporulation protein (spoOB), GTP-binding protein (obg), phenylalanine biosynthesis associated protein (pheB), and monofunctional prephenate dehydratase (pheA) genes, complete cds.
AFFX-r2-Bs-phe-3_at	680.1	P	0.000244	898.8	P	0.000244	732.8	P	0.000244	795.6	P	0.000244	812.3	P	0.000244	927.2	P	0.000244	B. subtilis GEN=pheB DB_XREF=gb:M24537.1 NOTE=SIF corresponding to nucleotides 2897-3200 of gb:M24537.1, not 100% identical DEF=Bacillus subtillis sporulation protein (spoOB), GTP-binding protein (obg), phenylalanine biosynthesis associated protein (pheB), and monofunctional prephenate dehydratase (pheA) genes, complete cds.
AFFX-r2-Bs-thr-5_s_at	2087.9	P	0.000244	3170.3	P	0.000244	2344.4	P	0.000244	2451.5	P	0.000244	2994	P	0.000244	3322.8	P	0.000244	B. subtilis GEN=thrC DB_XREF=gb:X04603.1 NOTE=SIF corresponding to nucleotides 290-888 of gb:X04603.1 DEF=B. subtilis thrB and thrC genes for homoserine kinase and threonine synthase.
AFFX-r2-Bs-thr-M_s_at	2363.8	P	0.001221	3316.8	P	0.000244	3149.6	P	0.000732	3157.9	P	0.00415	3521.2	P	0.001953	3350.1	P	0.001953	B. subtilis GEN=thrC, thrB DB_XREF=gb:X04603.1 NOTE=SIF corresponding to nucleotides 1045-1556 of gb:X04603.1 DEF=B. subtilis thrB and thrC genes for homoserine kinase and threonine synthase.
AFFX-r2-Bs-thr-3_s_at	1765	P	0.000244	2486.7	P	0.000244	2239.7	P	0.000244	2116.3	P	0.000244	2420.8	P	0.000244	2635.3	P	0.000244	B. subtilis GEN=thrB DB_XREF=gb:X04603.1 NOTE=SIF corresponding to nucleotides 1735-2143 of gb:X04603.1 DEF=B. subtilis thrB and thrC genes for homoserine kinase and threonine synthase.
AFFX-r2-Ec-BioB_s_at	131	P	0.000244	51.4	P	0.000732	67.6	P	0.000732	592.2	P	0.000244	343.3	P	0.000244	361	P	0.000244	E. coli GEN=bioB DB_XREF=gb:J04423 NOTE=CONTROL DEF=E. coli bioB gene biotin synthetase.
AFFX-r2-Ec-BioC_s_at	51	P	0.000244	38.2	P	0.00415	25.9	P	0.008057	360.4	P	0.000244	278.7	P	0.000244	242.3	P	0.000244	E. coli GEN=bioC DB_XREF=gb:J04423 NOTE=CONTROL DEF=E. coli bioC protein.
AFFX-r2-Ec-CreX_s_at	7.1	A	0.303711	9.5	A	0.129639	17	A	0.111572	11.6	A	0.095215	10.6	A	0.19458	12.9	A	0.149658	Bacteriophage P1 GEN=cre DB_XREF=gb:X03453 NOTE=CONTROL DEF=Bacteriophage P1 cre recombinase protein.
AFFX-r2-Ec-DapX_at	222.9	P	0.01416	309.1	P	0.005859	474	P	0.008057	317.3	P	0.008057	313.1	P	0.00415	316.5	P	0.00415	B. subtilis GEN=dapB, jojF, jojG DB_XREF=gb:L38424 NOTE=CONTROL; corresponding to nucleotides 1358-3197 of gb:L38424 DEF=B. subtilis dapB, jojF, jojG genes.
AFFX-r2-Ec-HXB2_at	0.2	A	0.943848	3.3	A	0.398926	0.5	A	0.919434	2.4	A	0.696289	0.4	A	0.932373	1.1	A	0.780518	Human immunodeficiency virus GEN=HXB2 DB_XREF=gb:K03455.1 NOTE=CONTROL; Affymetrix probe set overlaps the Gag Pol sequences DEF=Human immunodeficiency virus type 1 (HXB2).
AFFX-r2-Ec-LysX_at	374.5	P	0.001221	503.1	P	0.001221	474	P	0.001953	454.7	P	0.001953	546.4	P	0.001953	503.7	P	0.001953	B. subtilis GEN=lys DB_XREF=gb:X17013 NOTE=CONTROL; corresponding to nucleotides 350-1345 of gb:X17013 DEF=B. subtilis lys gene for diaminopimelate decarboxylase.
AFFX-r2-Ec-PheX_at	6.6	A	0.27417	3	A	0.567627	0.7	A	0.780518	2.1	A	0.533936	0.8	A	0.80542	4.2	A	0.5	B. subtilis GEN= pheB, pheA DB_XREF=gb:M24537 NOTE=CONTROL; corresponding to nucleotides 2017-3334 of gb:M24537 DEF=B. subtilis pheB, pheA genes.
AFFX-r2-Ec-ThrX_s_at	1997.7	P	0.000244	2838.5	P	0.000244	2556.6	P	0.000244	2319.1	P	0.000244	2639.2	P	0.000244	2847.9	P	0.000244	B. subtilis GEN=thrC, thrB DB_XREF=gb:X04603 NOTE=CONTROL; corresponding to nucleotides 248-2229 of gb:X04603 DEF=B. subtilis thrC, thrB genes.
AFFX-r2-Ec-TrpnX_at	11.8	A	0.246094	3.8	A	0.366211	14.6	A	0.246094	3.5	A	0.27417	12.7	A	0.5	13.4	A	0.19458	B. subtilis GEN=trpE, trpD, trpC DB_XREF=gb:K01391 NOTE=CONTROL; corresponding to nucleotides 1883-4400 of gb:K01391 DEF=B. subtilis TrpE protein, TrpD protein, TrpC protein.
AFFX-yel005_5_at	1.1	A	0.52976	0.6	A	0.804734	0.7	A	0.52977	1.7	A	0.425956	0.4	A	0.834181	1.6	A	0.631573	S. cerevisiae /GEN=YFL005C /DB_XREF=gb:U18530.1 /NOTE=SIF corresponding to nucleotides 55579-56273 of gb:U18530.1 /DEF=Saccharomyces cerevisiae chromosome V cosmids 9871, 8199, 9867, 9495 and lambda clones 6693 and 5898.
AFFX-yel005_M_at	1.5	A	0.39692	0.7	A	0.514903	1.7	A	0.287743	1.4	A	0.71229	3.9	A	0.262809	2.7	A	0.275059	S. cerevisiae /GEN=YFL005C /DB_XREF=gb:U18530.1 /NOTE=SIF corresponding to nucleotides 56612-57216 of gb:U18530.1 /DEF=Saccharomyces cerevisiae chromosome V cosmids 9871, 8199, 9867, 9495 and lambda clones 6693 and 5898.
AFFX-yel005_3_at	0.1	A	0.937071	1.1	A	0.760937	0.1	A	0.897855	0.8	A	0.354428	1.3	A	0.617411	1.8	A	0.156732	S. cerevisiae /GEN=YFL005C /DB_XREF=gb:U18530.1 /NOTE=SIF corresponding to nucleotides 57518-58149 of gb:U18530.1 /DEF=Saccharomyces cerevisiae chromosome V cosmids 9871, 8199, 9867, 9495 and lambda clones 6693 and 5898.
AFFX-yel006_5_at	0.5	A	0.937087	3.1	A	0.425962	1.5	A	0.559359	3.2	P	0.046467	2.6	A	0.185131	3.9	A	0.108979	S. cerevisiae /GEN=YFL006W /DB_XREF=gb:U18530.1 /DB_XREF=spd:YFL006W /NOTE=SIF corresponding to nucleotides 56425-55747 of gb:U18530.1 /DEF=Saccharomyces cerevisiae chromosome V cosmids 9871, 8199, 9867, 9495 and lambda clones 6693 and 5898.
AFFX-yel006_M_at	3.4	P	0.023919	1.5	A	0.749204	2.1	A	0.227636	2.2	A	0.300575	3.8	A	0.195246	2	A	0.368427	S. cerevisiae /GEN=YFL006W /DB_XREF=gb:U18530.1 /DB_XREF=spd:YFL006W /NOTE=SIF corresponding to nucleotides 55323-54724 of gb:U18530.1 /DEF=Saccharomyces cerevisiae chromosome V cosmids 9871, 8199, 9867, 9495 and lambda clones 6693 and 5898.
AFFX-yel006_3_at	3.2	A	0.216524	3.3	A	0.327079	4	A	0.39692	4.3	A	0.368438	6.1	A	0.250777	3.2	A	0.804734	S. cerevisiae /GEN=YFL006W /DB_XREF=gb:U18530.1 /DB_XREF=spd:YFL006W /NOTE=SIF corresponding to nucleotides 54299-53733 of gb:U18530.1 /DEF=Saccharomyces cerevisiae chromosome V cosmids 9871, 8199, 9867, 9495 and lambda clones 6693 and 5898.
AFFX-HXB2_5_at	0.4	A	0.897835	0.5	A	0.941572	0.2	A	0.98333	0.5	A	0.804734	0.2	A	0.937087	0.3	A	0.932339	Human immunodeficiency virus /GEN=HXB2 /DB_XREF=gb:K03455.1 /NOTE=SIF corresponding to nucleotides 2243-2585 of gb:K03455.1, not 100% identical /DEF=Human immunodeficiency virus type 1 (HXB2), complete genome; HIV1/HTLV-III/LAV reference genome.
AFFX-HXB2_M_at	0.2	A	0.993129	0.2	A	0.998204	0.5	A	0.986189	0.2	A	0.979978	0.3	A	0.997133	0.7	A	0.979978	Human immunodeficiency virus /GEN=HXB2 /DB_XREF=gb:K03455.1 /NOTE=SIF corresponding to nucleotides 2583-2926 of gb:K03455.1 /DEF=Human immunodeficiency virus type 1 (HXB2), complete genome; HIV1/HTLV-III/LAV reference genome.
AFFX-HXB2_3_at	0.2	A	0.932322	2.4	A	0.440646	0.1	A	0.983414	0.6	A	0.834139	1.9	A	0.588627	1.1	A	0.39692	Human immunodeficiency virus /GEN=HXB2 /DB_XREF=gb:K03455.1 /NOTE=SIF corresponding to nucleotides 2933-3275 of gb:K03455.1, not 100% identical /DEF=Human immunodeficiency virus type 1 (HXB2), complete genome; HIV1/HTLV-III/LAV reference genome.
1761388_s_at	218.1	P	0.010742	57.9	P	0.023926	75.1	P	0.030273	730.7	P	0.000244	560.1	P	0.000732	569.6	P	0.00293	CFT073_bioB_c0855 DB_XREF=26246745 SEG=NC_004431:+832119,833159 LEN=1040 DEF=Biotin synthase
1764284_at	6	A	0.303711	12.8	M	0.056152	13.6	A	0.111572	6.6	A	0.27417	0.5	A	0.828613	4.4	A	0.5	E. coli DB_XREF=M12987 DEF=F Plasmid Protein A
1762289_at	0.6	A	0.984863	0.9	A	0.981445	1	A	0.991943	1.3	A	0.976074	1.8	A	0.919434	1	A	0.953857	E. coli DB_XREF=M12987 DEF=F Plasmid Protein B
1763605_at	1.1	A	0.850342	2.8	A	0.567627	2.5	A	0.696289	2.5	A	0.665527	4.5	A	0.432373	8.3	A	0.432373	E. coli DB_XREF=M12987 DEF=F Plasmid Protein C
1759263_at	13.8	P	0.046143	21.2	P	0.00415	16.2	P	0.01416	28.5	P	0.008057	24.3	P	0.023926	25.4	P	0.018555	E. coli DB_XREF=M12987 DEF=F Plasmid Protein D
1766209_at	1.5	A	0.19458	6.4	A	0.303711	3.6	A	0.27417	9.9	P	0.035645	1.2	A	0.334473	4.9	A	0.303711	E. coli DB_XREF=M12987 DEF=F Plasmid Protein E
1760287_at	0.8	A	0.888428	1.5	A	0.72583	3.1	A	0.696289	3.7	A	0.432373	9.7	A	0.334473	11.7	A	0.423828	E. coli DB_XREF=M12987 DEF=F Plasmid Protein G
1766170_at	1.9	A	0.870361	1.3	A	0.953857	0.4	A	0.943848	0.7	A	0.828613	1.6	A	0.850342	0.9	A	0.888428	E. coli DB_XREF=M12987 DEF=F Plasmid Protein H
1760148_at	1.4	A	0.696289	0.4	A	0.828613	8.9	A	0.601074	1.5	A	0.80542	3.2	A	0.533936	9.9	A	0.5	E. coli DB_XREF=M54796 DEF=F Plasmid traD
1763401_at	7.4	A	0.171387	12.7	A	0.334473	9.1	A	0.149658	5.2	A	0.398926	3.9	A	0.5	15.5	A	0.219482	E. coli DB_XREF=M54796 DEF=F Plasmid traI, helicase I
1765713_at	0.6	A	0.567627	1.8	A	0.334473	0.6	A	0.432373	1.5	A	0.466064	0.8	A	0.466064	6.6	A	0.366211	E. coli DB_XREF=M54796 DEF=F Plasmid trbH
1768318_at	0.7	A	0.953857	0.9	A	0.994141	1.1	A	0.943848	4.6	A	0.828613	1	A	0.976074	1.4	A	0.962402	Phage M13 DB_XREF=V00604 DEF=Phage M13 gene III structural protein of virion
1766148_at	0.2	A	0.962402	0.6	A	0.969727	0.4	A	0.828613	0.5	A	0.72583	0.6	A	0.74707	3.2	A	0.567627	Phage M13 DB_XREF=V00604 DEF=Phage M13 gene II (across origin 5 -3 ) protein required for replication
1760403_at	0.1	A	0.989258	0.8	A	0.80542	0.1	A	0.99585	0.3	A	0.919434	0.3	A	0.822998	0.9	A	0.753906	Phage M13 DB_XREF=V00604 DEF=Phage M13 gene II (across origin 5 -3 ) protein required for replication
1768569_at	0.3	A	0.601074	0.1	A	0.366211	8.5	A	0.219482	2.9	A	0.398926	5.3	A	0.171387	0.7	A	0.398926	Phage M13 DB_XREF=V00604 DEF=Phage M13 gene IV protein required for phage assembly
1766042_at	0.2	A	0.432373	4.6	A	0.149658	2.9	A	0.219482	0.1	A	0.850342	3.4	A	0.219482	3.4	A	0.334473	Phage M13 DB_XREF=V00604 DEF=Phage M13 gene IX structural protein of virion
1763478_at	0.9	A	0.753906	6.2	A	0.432373	5.9	A	0.366211	5.9	A	0.366211	8.4	A	0.067627	2.5	A	0.466064	Phage M13 DB_XREF=V00604 DEF=Phage M13 gene I protein required for phage assembly
1765025_at	1	A	0.491211	15.6	P	0.030273	6.8	A	0.432373	17.8	A	0.129639	13.5	A	0.219482	8.2	A	0.246094	Phage M13 DB_XREF=V00604 DEF=Phage M13 gene VIII structural protein of virion
1761344_at	0.6	A	0.828613	3	A	0.72583	0.7	A	0.780518	1.1	A	0.72583	1	A	0.919434	11.2	A	0.19458	Phage M13 DB_XREF=V00604 DEF=Phage M13 gene VII protein required for phage assembly
1766515_at	1.4	A	0.27417	1.5	A	0.533936	1.3	A	0.398926	0.6	A	0.696289	2.5	A	0.366211	0.8	A	0.665527	Phage M13 DB_XREF=V00604 DEF=Phage M13 gene VI small hydrophobic protein, part of capsid
1766737_at	6.2	A	0.19458	6.1	A	0.432373	5.1	A	0.398926	2.7	A	0.398926	1	A	0.904785	18	A	0.19458	Phage M13 DB_XREF=V00604 DEF=Phage M13 gene V helix destabilising protein (DNA synthesis)
1764185_s_at	16.9	A	0.19458	3.5	A	0.398926	12.6	A	0.171387	32	P	0.046143	17.2	A	0.246094	19	A	0.080566	Phage Lambda DB_XREF=J02459 DEF=Lambda A, DNA packaging
1763826_s_at	15.5	A	0.19458	18.7	A	0.219482	14.5	A	0.149658	18.7	A	0.219482	17.7	A	0.246094	27.3	A	0.19458	Phage Lambda DB_XREF=J02459 DEF=Lambda B, capsid component
1765762_s_at	0.5	A	0.753906	2.3	A	0.665527	2.8	A	0.633789	0.7	A	0.601074	1.6	A	0.753906	2.9	A	0.633789	Phage Lambda DB_XREF=J02459 DEF=Lambda C, capsid component
1765432_s_at	2.9	A	0.72583	20.2	A	0.533936	34.1	A	0.303711	24.4	A	0.246094	29.7	A	0.246094	24.6	A	0.149658	Phage Lambda DB_XREF=J02459 DEF=Lambda D, head-DNA stabilization
1767187_s_at	2	A	0.466064	6.6	A	0.398926	5.7	A	0.5	2.4	A	0.533936	3.2	A	0.5	2.1	A	0.696289	CFT073_c3168 DB_XREF=26249010 SEG=NC_004431:-3039531,3040556 LEN=1025 DEF=Putative capsid protein of prophage
1761320_s_at	30.2	A	0.246094	48.6	A	0.171387	31.5	A	0.334473	21.7	A	0.366211	52.5	A	0.334473	27.2	A	0.295898	CFT073_c3167 DB_XREF=26249009 SEG=NC_004431:-3039094,3039528 LEN=434 DEF=Putative DNA packaging protein of prophage
1764984_s_at	0.8	A	0.943848	0.7	A	0.932373	0.6	A	0.953857	2.6	A	0.665527	5.1	A	0.608887	2.5	A	0.665527	Phage Lambda DB_XREF=J02459 DEF=Lambda Fii, head-tail joining
1759854_s_at	1.4	A	0.633789	11.8	A	0.27417	4.3	A	0.533936	7.9	A	0.334473	1.1	A	0.72583	7.7	A	0.432373	Phage Lambda DB_XREF=J02459 DEF=Lambda G, tail component
1759657_s_at	4.6	A	0.366211	11.1	P	0.023926	9.9	A	0.149658	9.1	A	0.095215	10.5	A	0.27417	6.9	A	0.303711	EDL933_Z1898 DB_XREF=GI:12514827 SEG=NC_002655:+1724410,1725748 LEN=1338 DEF=putative tail component of prophage CP-933X
1765278_s_at	1.4	A	0.780518	1.1	A	0.991943	1.1	A	0.976074	10.5	A	0.72583	2.8	A	0.888428	1.7	A	0.962402	Phage Lambda DB_XREF=J02459 DEF=Lambda I, tail component
1763895_s_at	0.5	A	0.828613	2	A	0.633789	1.3	A	0.753906	1.9	A	0.780518	3.5	A	0.72583	12.5	A	0.5	Phage Lambda DB_XREF=J02459 DEF=Lambda J, tail:host specificity
1765973_s_at	68.2	P	0.010742	128.2	P	0.00293	239	P	0.00415	205.3	P	0.001953	338	P	0.005859	226.1	P	0.005859	Phage Lambda DB_XREF=J02459 DEF=Lambda K, tail component
1765080_s_at	3.9	A	0.27417	19.5	A	0.366211	1.9	A	0.246094	9.8	A	0.149658	14.8	A	0.19458	14.5	A	0.303711	Phage Lambda DB_XREF=J02459 DEF=Lambda L, tail component
1760442_s_at	12.6	A	0.398926	20.4	A	0.27417	41.3	A	0.095215	61.2	A	0.067627	48.6	A	0.080566	70.5	M	0.056152	Phage Lambda DB_XREF=J02459 DEF=Lambda M,tail component
1760949_s_at	6.5	A	0.303711	26	A	0.303711	12.1	A	0.246094	25.9	A	0.219482	22.3	A	0.303711	30	A	0.219482	EDL933_Z1451 DB_XREF=GI:12514304 SEG=NC_002655:+1345319,1346020 LEN=701 DEF=putative replication protein P of bacteriophage BP-933W
1762425_s_at	11	A	0.149658	8.2	A	0.080566	15.6	P	0.018555	17.6	P	0.037598	11	A	0.067627	11.6	P	0.030273	Phage Lambda DB_XREF=J02459 DEF=Lambda Q, late gene regulator
1765871_s_at	1.8	A	0.398926	6.1	A	0.27417	2.7	A	0.432373	11.9	A	0.149658	3.3	A	0.398926	4.6	A	0.303711	Phage Lambda DB_XREF=J02459 DEF=Lambda R, cell lysis
1760335_s_at	3.1	A	0.219482	3.5	A	0.303711	8.7	A	0.19458	6.5	A	0.080566	8.1	A	0.095215	3	A	0.080566	Phage Lambda DB_XREF=J02459 DEF=Lambda T, tail component
1766432_s_at	13.7	A	0.334473	7.8	A	0.27417	3.1	A	0.5	5.3	A	0.366211	2.8	A	0.466064	13.1	A	0.432373	Phage Lambda DB_XREF=J02459 DEF=Lambda U, tail component
1759982_s_at	11.4	A	0.366211	23.1	A	0.246094	55	A	0.246094	68.4	A	0.095215	65.8	A	0.19458	69.4	A	0.171387	Phage Lambda DB_XREF=J02459 DEF=Lambda V, tail component
1767743_s_at	7	A	0.466064	1.9	A	0.657227	8.1	A	0.366211	7	A	0.533936	10.3	A	0.432373	15	A	0.398926	EDL933_Z1884 DB_XREF=GI:12514812 SEG=NC_002655:+1716551,1716706 LEN=155 DEF=putative head-tail joining protein of prophage CP-933X
1759585_s_at	11.8	A	0.5	14.9	A	0.432373	15.5	A	0.567627	58.8	A	0.246094	3.3	A	0.567627	12.8	A	0.466064	EDL933_Z1891 DB_XREF=GI:12514822 SEG=NC_002655:+1722178,1722423 LEN=245 DEF=putative tail component of prophage CP-933X
1759525_at	0.7	A	0.72583	1.3	A	0.80542	4.2	A	0.533936	0.9	A	0.828613	9.5	A	0.466064	0.5	A	0.981445	Phage Lambda DB_XREF=J02459 DEF=Lambda ea31
1764231_at	0.1	A	0.991943	0.1	A	0.919434	0.2	A	0.962402	0.1	A	0.98584	0.5	A	0.696289	7	A	0.432373	Phage Lambda DB_XREF=J02459 DEF=Lambda ea59
1765790_s_at	4.5	A	0.398926	8.6	A	0.533936	5.6	A	0.432373	14.7	A	0.334473	10.7	A	0.366211	3.8	A	0.398926	Phage Lambda DB_XREF=J02459 DEF=Lambda mRNA-pl
1765626_at	1.5	A	0.80542	1.7	A	0.80542	1	A	0.919434	1.2	A	0.904785	0.7	A	0.932373	3	A	0.850342	Phage Lambda DB_XREF=J02459 DEF=Lambda mRNA-pr
1761509_s_at	10.8	A	0.111572	10	A	0.171387	28.7	A	0.095215	12.1	A	0.219482	8.3	A	0.27417	34.4	A	0.111572	Phage P1 DB_XREF= X03453 DEF=Bacteriophage P1 ORF1
1761020_at	4	A	0.303711	4.7	A	0.219482	7.9	A	0.696289	9.4	A	0.533936	9	A	0.149658	14.1	A	0.080566	Phage P1 DB_XREF= M95666 DEF=Bacteriophage P1 gene doc
1761228_at	2.1	A	0.633789	1.1	A	0.72583	0.6	A	0.696289	0.7	A	0.72583	0.8	A	0.870361	0.8	A	0.72583	Phage P1 DB_XREF= M95666 DEF=Bacteriophage P1 gene 10, gp10
1765977_at	4	A	0.295898	7.6	A	0.334473	8.4	A	0.334473	6.1	A	0.303711	0.4	A	0.432373	14.3	A	0.213379	Phage P1 DB_XREF= M95666 DEF=Bacteriophage P1 orf, between doc and gp10
1759689_at	1.1	A	0.828613	7.4	A	0.432373	10.1	A	0.246094	2.1	A	0.567627	9.8	A	0.432373	8.2	A	0.432373	Phage P1 DB_XREF= M95666 DEF=Bacteriophage P1 gene phd
1768195_at	0.7	A	0.888428	0.5	A	0.633789	1.5	A	0.466064	0.9	A	0.567627	0.5	A	0.72583	0.8	A	0.601074	Phage P1 DB_XREF=K02380 DEF=Bacteriophage P1 unidentified reading frame
1765318_at	1	A	0.904785	0.5	A	0.991943	7.6	A	0.665527	12.3	A	0.533936	2	A	0.850342	7.9	A	0.633789	Phage P1 DB_XREF=K02380 DEF=Bacteriophage P1 gene parA
1765443_at	5.5	A	0.171387	1.5	A	0.398926	10.2	A	0.149658	8.3	A	0.067627	4.8	M	0.056152	8	A	0.149658	Phage P1 DB_XREF=K02380 DEF=Bacteriophage P1 gene parB
1766482_at	8.1	A	0.366211	8.8	A	0.19458	7.8	A	0.567627	1.3	A	0.696289	8	A	0.27417	1.9	A	0.633789	Phage P1 DB_XREF=K02380 DEF=Bacteriophage P1 gene repA
1765935_s_at	18.8	A	0.111572	17.2	A	0.149658	15	A	0.129639	21.1	A	0.129639	14.2	A	0.19458	17	A	0.19458	E. coli DB_XREF=J01749 DEF=Plasmid pBR322 bla, beta-lactamase
1761722_at	9	A	0.219482	6.9	A	0.398926	3.3	A	0.334473	10.5	A	0.246094	16.2	A	0.080566	2.4	A	0.533936	E. coli DB_XREF=J01749 DEF=Plasmid pBR322 ROP protein
1764690_at	5.1	A	0.334473	0.9	A	0.366211	1.5	A	0.398926	2.7	A	0.466064	8.5	A	0.246094	6.9	A	0.303711	E. coli DB_XREF=J01749 DEF=Plasmid pBR322 tet, tetracycline resistance protein
AFFX-Ec-AY342347_at	4.6	A	0.27417	10.5	A	0.466064	8.4	A	0.080566	0.9	A	0.533936	4	A	0.303711	7.8	A	0.334473	CONTROL AY342347 DEF=Red H-Pelican DsRed.T4 transformation vector, complete sequence.
AFFX-Ec-U43284-1_s_at	0.9	A	0.601074	7.5	A	0.219482	2.7	A	0.567627	4.9	A	0.334473	21.3	A	0.149658	13.3	A	0.171387	CONTROL U43284 FEA=CDS DB_XREF=AAC53659.1 GI:1289375 PROD=green fluorescent protein, S65T variant GEN=gfp
AFFX-Ec-AJ002682-1_s_at	5.6	A	0.432373	0.3	A	0.633789	11.2	A	0.303711	6.9	A	0.303711	9	A	0.303711	20.2	A	0.219482	CONTROL AJ002682 FEA=CDS_1 DB_XREF=CAA05684.1 GI:2623979 REMTREMBL:CAA05684 GEN=kanamycin resistance gene
AFFX-Ec-X58791-1_s_at	1.5	A	0.696289	8.4	A	0.432373	9.6	A	0.398926	4.9	A	0.567627	4.1	A	0.366211	1.1	A	0.567627	CONTROL X58791 FEA=CDS_1 DB_XREF=CAA41597.1 GI:48447 SPTREMBL:Q56698 PROD=luciferase alpha subunit GEN=luxA
AFFX-Ec-X58791-2_s_at	6.1	A	0.27417	5	A	0.432373	16.3	A	0.067627	11	A	0.366211	21.5	A	0.19458	28.9	A	0.246094	CONTROL X58791 FEA=CDS_2 DB_XREF=CAA41598.1 GI:48448 SPTREMBL:Q56699 PROD=luciferase beta subunit GEN=luxB
AFFX-Ec-M10961-1_at	4.1	A	0.19458	2.5	A	0.27417	3.7	A	0.432373	1.2	A	0.567627	5.4	A	0.334473	1	A	0.601074	CONTROL M10961 FEA=CDS_1 DB_XREF=AAA88684.1 GI:1197014 PROD=unknown protein NOTE=ORF; putative
AFFX-Ec-M10961-4_at	6.4	A	0.067627	2.2	A	0.111572	0.6	A	0.466064	4	A	0.19458	6.3	P	0.010742	7	P	0.005859	CONTROL M10961 FEA=CDS_4 DB_XREF=AAA88687.1 GI:1197015 PROD=unknown protein NOTE=ORF; putative
AFFX-Ec-A00196-1_s_at	50.3	P	0.00415	49.9	P	0.037598	62.2	P	0.018555	176.1	P	0.001221	121.6	P	0.008057	99.8	P	0.00293	CONTROL A00196 FEA=CDS DB_XREF=CAA00038.1 GI:14446 REMTREMBL:CAA00038 PROD=beta glucuronidase GEN=uidA
AFFX-Ec-M15077-1_s_at	3.1	A	0.432373	9.1	A	0.129639	4.4	A	0.27417	4.3	A	0.366211	8.3	A	0.219482	0.5	A	0.334473	CONTROL M15077 FEA=CDS DB_XREF=AAA29795.1 GI:160794 NOTE=Luciferase
AFFX-Ec-AF292560-1_s_at	3	A	0.111572	4.9	A	0.303711	5.2	P	0.01416	3.8	A	0.27417	2.4	A	0.398926	3.4	P	0.023926	CONTROL AF292560 FEA=CDS_1 DB_XREF=AAG34048.1 GI:11321082 PROD=cyan fluorescent protein cfp GEN=cfp
AFFX-Ec-U47295-1_s_at	0.7	A	0.567627	8	A	0.219482	2.2	A	0.432373	7.3	A	0.129639	4.9	A	0.366211	5.3	A	0.366211	CONTROL U47295 FEA=CDS_1 DB_XREF=AAA89082.1 GI:1200460 PROD=luciferase GEN=luc+
AFFX-Ec-AJ132968-1_at	5	A	0.19458	10.4	A	0.303711	13.3	A	0.19458	15.1	A	0.129639	17.8	A	0.080566	29	A	0.080566	CONTROL AJ132968 FEA=CDS FUNCTION=chloramphenicol resistence DB_XREF=CAB42001.1 GI:4753685 PROD=chloramphenicol acteyl transferase GEN=cat
AFFX-Ec-NM_131175-1_at	0.8	A	0.753906	1.1	A	0.665527	0.7	A	0.850342	0.8	A	0.753906	1	A	0.80542	1.5	A	0.870361	CONTROL NM_131175 FEA=CDS DB_XREF=NP_571250.1 GI:18859311 LocusID:30413 PROD=opsin 1 (cone pigments), long-wave-sensitive, 1 NOTE=immunolocalized to double cone outer segments; red-sensitive opsin; GEN=opn1lw1
AFFX-Ec-J01636-1_s_at	359.8	P	0.00415	357.2	P	0.008057	263.5	P	0.001953	259.4	P	0.00293	294.9	P	0.005859	231.7	P	0.00415	CONTROL J01636 FEA=CDS_1 DB_XREF=AAA24052.1 GI:146576 NOTE=lac repressor protein (gtg start codon) GEN=lacI
AFFX-Ec-J01636-2_s_at	47.5	P	0.030273	103.2	P	0.018555	95.8	P	0.01416	337.9	P	0.000244	454.8	P	0.000732	283.9	P	0.000244	CONTROL J01636 FEA=CDS_2 DB_XREF=AAA24053.1 GI:146577 NOTE=beta-d-galactosidase GEN=lacZ
AFFX-Ec-J01636-3_s_at	46	P	0.030273	56.4	P	0.046143	78.8	P	0.023926	325.1	P	0.001221	319	P	0.00415	307.5	P	0.000732	CONTROL J01636 FEA=CDS_3 DB_XREF=AAA24054.1 GI:146578 NOTE=lactose permease GEN=lacY
1768303_s_at	16.8	P	0.000244	37.6	P	0.000244	56	P	0.000244	335.5	P	0.000244	273.9	P	0.000244	264.9	P	0.000244	EDL933_lacA_Z0438 DB_XREF=GI:12513173 SEG=NC_002655:-418027,418638 LEN=611 DEF=thiogalactoside acetyltransferase
AFFX-Ec-ECOLOXL_s_at	881.9	P	0.000244	528.3	P	0.000244	878.6	P	0.000244	422.1	P	0.000244	383.9	P	0.000244	371.9	P	0.000244	CONTROL M10289 DEF=E.coli bacteriophage P1 loxL recombination site.
AFFX-Ec-K01486-1_s_at	0	A	0.345703	0.3	A	0.943359	0.1	A	0.977539	0	A	0.976563	0.2	A	0.65332	0	A	0.957031	CONTROL K01486 FEA=CDS DB_XREF=AAA34626.1 GI:171558 NOTE=GAL4 protein
AFFX-Ec-AY056050-1_at	0.9	A	0.665527	1.5	A	0.72583	0.7	A	0.72583	2.4	A	0.601074	1.6	A	0.633789	2.9	A	0.533936	CONTROL AY056050 FEA=CDS DB_XREF=AAL31698.1 GI:17016300 PROD=codon-optimized cre recombinase NOTE=contains part of the large T nuclear localization signal sequence GEN=iCre
AFFX-Ec-AF298789-1_at	0.9	A	0.780518	2.1	A	0.665527	5	A	0.665527	2.4	A	0.592773	0.8	A	0.870361	1.4	A	0.850342	CONTROL AF298789 FEA=CDS_1 DB_XREF=AAG34533.1 GI:11344896 PROD=phosphoribosylanthranilate isomerase GEN=TRP1
AFFX-Ec-J01347-1_s_at	0.4	A	0.753906	1.6	A	0.828613	5	A	0.466064	0.8	A	0.753906	0.7	A	0.870361	0.7	A	0.904785	CONTROL J01347 FEA=CDS_1 DB_XREF=AAB59340.1 GI:172191 NOTE=recombinase (FLP)
AFFX-Ec-J01347-2_at	7.8	A	0.171387	10.2	A	0.246094	7.7	A	0.334473	0.9	A	0.601074	6.9	A	0.432373	11.6	A	0.27417	CONTROL J01347 FEA=CDS_2 DB_XREF=AAB59341.1 GI:172192 NOTE=Rep 1 protein
AFFX-Ec-J01347-3_at	0.2	A	0.844727	0.2	A	0.953857	0.5	A	0.567627	3.1	A	0.149658	3	A	0.246094	0.2	A	0.665527	CONTROL J01347 FEA=CDS_3 DB_XREF=AAB59342.1 GI:172193 NOTE=D protein
AFFX-Ec-J01347-4_at	0.5	A	0.845215	1.4	A	0.567627	3.3	A	0.466064	0.2	A	0.981445	0.4	A	0.844727	0.3	A	0.943848	CONTROL J01347 FEA=CDS_4 DB_XREF=AAB59343.1 GI:172194 NOTE=Rep 2 protein
AFFX-Ec-U57609-2_s_at	5.4	A	0.366211	4.7	A	0.533936	4.5	A	0.42334	6.6	A	0.219482	12.5	A	0.19458	6.1	A	0.366211	CONTROL U57609 FEA=CDS_2 DB_XREF=AAB08065.1 GI:1373326 PROD=neomycin phosphotransferase
AFFX-Ec-AB076373-1_at	0.5	A	0.991943	0.7	A	0.943848	1.4	A	0.567627	3.3	A	0.533936	8.5	A	0.567627	1.5	A	0.919434	CONTROL AB076373 FEA=CDS_1 DB_XREF=BAC00955.1 GI:21623749 PROD=thiazole synthase GEN=ptrA
AFFX-Ec-AF323980-1_at	1.4	A	0.533936	0.2	A	0.989258	0.1	A	0.633789	0.2	A	0.888428	4.3	A	0.080566	2.7	A	0.633789	CONTROL AF323980 FEA=CDS DB_XREF=AAK26531.1 GI:13446782 PROD=minor outer capsid protein VP4 NOTE=viral protein 4
AFFX-Ec-AF292559-2_s_at	1.3	A	0.567627	5.6	A	0.334473	1.5	A	0.432373	3.9	A	0.080566	0.3	A	0.919434	9.4	M	0.056152	CONTROL AF292559 FEA=CDS_2 DB_XREF=AAG34045.1 GI:11321078 PROD=mob GEN=mob
AFFX-Ec-AF292559-3_s_at	2.1	A	0.466064	4.2	A	0.246094	0.7	A	0.432373	3.8	A	0.303711	6.3	A	0.171387	4.5	A	0.219482	CONTROL AF292559 FEA=CDS_3 DB_XREF=AAG34046.1 GI:11321079 PROD=repB GEN=repB
AFFX-Ec-AF292559-4_s_at	0.6	A	0.865723	2.2	A	0.780518	0.8	A	0.953857	1.2	A	0.753906	1.1	A	0.953857	1.1	A	0.904785	CONTROL AF292559 FEA=CDS_4 DB_XREF=AAG34047.1 GI:11321080 PROD=kanamycin resistance protein GEN=aphA
AFFX-Ec-U89963-1_s_at	6.5	A	0.466064	24	A	0.19458	20.2	A	0.334473	19.4	A	0.219482	14	A	0.111572	21.4	A	0.171387	CONTROL U89963 FEA=CDS_1 DB_XREF=AAB68656.1 GI:2293128 PROD=VP16 NOTE=Activation domain of VP16
AFFX-Ec-U55943-1_s_at	11.8	A	0.466064	21.1	A	0.219482	13.8	A	0.303711	23.9	A	0.19458	20.6	A	0.111572	23.7	A	0.149658	CONTROL U55943 FEA=CDS_1 DB_XREF=AAB01203.1 GI:1335994 PROD=VP16 transactivation domain (modified)
AFFX-Ec-M57289-1_s_at	1	A	0.919434	2.3	A	0.780518	2.4	A	0.567627	2	A	0.753906	1.4	A	0.633789	1.2	A	0.828613	CONTROL M57289 FEA=CDS DB_XREF=AAA45864.1 GI:330320 GEN=VP16
1768436_s_at	48.5	P	0.037598	49.4	P	0.023926	58.4	P	0.037598	67.3	P	0.00293	47.7	P	0.023926	52.6	P	0.018555	MG1655_IS102_b4435 SEG=NC_000913:+2069337,2069540 LEN=203
1761274_at	439.2	P	0.000732	166	P	0.000732	332.5	P	0.000244	837.2	P	0.000244	617.3	P	0.000732	587	P	0.000732	MG1655_IS061_b4426 SEG=NC_000913:-1403676,1403833 LEN=157
1768494_s_at	2458.9	P	0.000244	1863.3	P	0.000244	1590.1	P	0.000244	1424.6	P	0.000244	1535	P	0.000244	1491.8	P	0.000244	MG1655_prfB_b2891 DB_XREF=PID:g2367172 SEG=NC_000913:-3033204,3034226 LEN=1022 DEF=peptide chain release factor RF-2
1766768_s_at	1454.6	P	0.000244	627.2	P	0.000244	1334.9	P	0.000244	1641.8	P	0.000244	1362.1	P	0.000244	1394.3	P	0.000244	MG1655_thrL_b0001 DB_XREF=PID:g1786182 SEG=NC_000913:+190,255 LEN=65 DEF=thr operon leader peptide
1759122_s_at	858.7	P	0.000244	307.4	P	0.000244	281	P	0.000244	2824.5	P	0.000244	2873.1	P	0.000244	3249	P	0.000244	MG1655_thrA_b0002 DB_XREF=PID:g1786183 SEG=NC_000913:+337,2799 LEN=2462 DEF=bifunctional: aspartokinase I (N-terminal); homoserine dehydrogenase I (C-terminal)
1765942_s_at	618.7	P	0.000244	265.7	P	0.000732	373.9	P	0.01416	2680.9	P	0.000244	3461.6	P	0.000244	3527	P	0.000244	MG1655_thrB_b0003 DB_XREF=PID:g1786184 SEG=NC_000913:+2801,3733 LEN=932 DEF=homoserine kinase
1761169_s_at	636.9	P	0.000244	337.3	P	0.000244	460.7	P	0.000244	3980.5	P	0.000244	5542.8	P	0.000244	5788.4	P	0.000244	MG1655_thrC_b0004 DB_XREF=PID:g1786185 SEG=NC_000913:+3734,5020 LEN=1286 DEF=threonine synthase
1768414_s_at	162.3	P	0.000244	210.5	P	0.000244	285.6	P	0.000244	333	P	0.000244	533.7	P	0.000244	504.6	P	0.000244	MG1655_yaaX_b0005 DB_XREF=PID:g1786186 SEG=NC_000913:+5234,5530 LEN=296 DEF=orf, hypothetical protein
1764399_s_at	223.7	P	0.000244	443.1	P	0.000244	445.4	P	0.000244	224.1	P	0.000244	260.6	P	0.000244	216	P	0.000244	MG1655_yaaA_b0006 DB_XREF=PID:g1786187 SEG=NC_000913:-5683,6459 LEN=776 DEF=orf, hypothetical protein
1764668_s_at	69.6	P	0.001953	258.5	P	0.000732	319	P	0.000732	100.7	P	0.000732	88.3	P	0.001221	100.6	P	0.00293	MG1655_yaaJ_b0007 DB_XREF=PID:g1786188 SEG=NC_000913:-6529,7959 LEN=1430 DEF=inner membrane transport protein
1759293_s_at	2658.1	P	0.000244	4901	P	0.000244	3202.6	P	0.000244	2912	P	0.000244	4044	P	0.000244	4748.6	P	0.000244	MG1655_talB_b0008 DB_XREF=PID:g1786189 SEG=NC_000913:+8238,9191 LEN=953 DEF=transaldolase B
1761428_s_at	702.9	P	0.000244	991.7	P	0.000244	934.5	P	0.000244	395.4	P	0.000244	415.6	P	0.000732	429.2	P	0.000732	MG1655_mog_b0009 DB_XREF=PID:g1786190 SEG=NC_000913:+9306,9893 LEN=587 DEF=putative molybdochetalase in molybdopterine biosynthesis
1768913_s_at	616	P	0.000244	329	P	0.000244	439.4	P	0.000244	359.5	P	0.000244	290	P	0.000732	234	P	0.000244	MG1655_yaaH_b0010 DB_XREF=PID:g1786191 SEG=NC_000913:-9928,10494 LEN=566 DEF=orf, hypothetical protein
1767645_s_at	25.8	P	0.005859	32.3	A	0.111572	53.4	P	0.008057	76.6	P	0.000732	67.1	P	0.00415	24.9	P	0.018555	MG1655_htgA_b0012 DB_XREF=PID:g1786194 SEG=NC_000913:+10725,11315 LEN=590 DEF=positive regulator for sigma 32 heat shock promoters
1766316_s_at	106.6	P	0.000732	110.5	P	0.000732	153.6	P	0.000244	95.6	P	0.001221	107.8	P	0.000244	85.6	P	0.000732	MG1655_b0011 DB_XREF=PID:g1786193 SEG=NC_000913:-10643,11356 LEN=713 DEF=putative oxidoreductase
1765508_s_at	29.8	P	0.037598	65.1	A	0.080566	84.8	P	0.00293	94.7	P	0.00293	89	P	0.001953	44.6	P	0.037598	MG1655_yaaI_b0013 DB_XREF=PID:g1786195 SEG=NC_000913:-11382,11786 LEN=404 DEF=orf, hypothetical protein
1763357_s_at	4357.1	P	0.000244	3430.2	P	0.000244	2569.1	P	0.000244	2762.4	P	0.000244	3339.4	P	0.000244	3650.6	P	0.000244	MG1655_dnaK_b0014 DB_XREF=PID:g1786196 SEG=NC_000913:+12163,14079 LEN=1916 DEF=chaperone Hsp70; DNA biosynthesis; autoregulated heat shock proteins
1769019_s_at	2292.8	P	0.000244	827.1	P	0.000244	569.6	P	0.000244	851.1	P	0.000244	843.4	P	0.000244	811.5	P	0.000244	MG1655_dnaJ_b0015 DB_XREF=PID:g1786197 SEG=NC_000913:+14168,15298 LEN=1130 DEF=chaperone with DnaK; heat shock protein
1762957_s_at	460.8	P	0.000244	350.2	P	0.000732	360.7	P	0.000732	297.9	P	0.000732	236.8	P	0.000732	166.9	P	0.000732	MG1655_yi82_1_b0017 DB_XREF=PID:g1786199 SEG=NC_000913:-15869,16177 LEN=308 DEF=hypothetical protein
1768300_s_at	1439.3	P	0.000244	836.6	P	0.000244	970.6	P	0.000244	701.8	P	0.000244	703.8	P	0.000244	605.6	P	0.000244	MG1655_yi81_1_b0016 DB_XREF=PID:g1786198 SEG=NC_000913:+15445,16557 LEN=1112 DEF=IS186 hypothetical protein
1767396_s_at	147.7	P	0.000244	107.6	P	0.000244	89.8	P	0.000732	247.7	P	0.000244	184.6	P	0.000732	155.4	P	0.000244	MG1655_hokC_b4412 SEG=NC_000913:-16751,16903 LEN=152 DEF=small toxic membrane polypeptide
1763890_at	156.6	P	0.000244	176.6	P	0.000244	618.4	P	0.000244	395.2	P	0.000244	227	P	0.000244	126.2	P	0.000244	MG1655_sokC_b4413 SEG=NC_000913:+16952,17006 LEN=54 DEF=antisense RNA blocking mokC (orf69) and hokC (gef) translation
1767510_s_at	773.2	P	0.000244	448.1	P	0.000732	495.7	P	0.001221	596.9	P	0.000732	485.2	P	0.000732	522.8	P	0.000732	MG1655_nhaA_b0019 DB_XREF=PID:g1786201 SEG=NC_000913:+17489,18655 LEN=1166 DEF=Na+H antiporter, pH dependent
1763076_s_at	476.6	P	0.000244	384.4	P	0.000244	404.6	P	0.000244	240.9	P	0.000244	173	P	0.000732	184.9	P	0.000244	MG1655_nhaR_b0020 DB_XREF=PID:g1786202 SEG=NC_000913:+18715,19620 LEN=905 DEF=transcriptional activator of nhaA
1762495_s_at	1140	P	0.000244	460.7	P	0.000244	630.8	P	0.000244	890.2	P	0.000244	592.3	P	0.000244	453.7	P	0.000244	MG1655_insB_1_b0021 DB_XREF=PID:g1786203 SEG=NC_000913:-19811,20314 LEN=503 DEF=IS1 protein InsB
1763370_s_at	1583	P	0.000244	976	P	0.000244	1407.7	P	0.000244	1207.1	P	0.000244	835.4	P	0.000244	594.2	P	0.000244	MG1655_insA_1_b0022 DB_XREF=PID:g1786204 SEG=NC_000913:-20233,20508 LEN=275 DEF=IS1 protein InsA
1762145_s_at	4175.8	P	0.000244	5726	P	0.000244	5387.5	P	0.000244	3118.9	P	0.000244	3403.9	P	0.000244	3240.6	P	0.000732	MG1655_rpsT_b0023 DB_XREF=PID:g1786206 SEG=NC_000913:-20815,21078 LEN=263 DEF=30S ribosomal subunit protein S20
1769125_s_at	119	P	0.000244	49.5	P	0.000244	57.7	P	0.000244	123.6	P	0.000244	93.5	P	0.000244	73.4	P	0.000244	MG1655_b0024 DB_XREF=PID:g1786207 SEG=NC_000913:+21181,21399 LEN=218 DEF=orf, hypothetical protein
1767208_s_at	2017.9	P	0.000244	1236	P	0.000244	1234.9	P	0.000244	1240.4	P	0.000244	1291.2	P	0.000244	1317.7	P	0.000244	MG1655_ribF_b0025 DB_XREF=PID:g1786208 SEG=NC_000913:+21407,22348 LEN=941 DEF=putative regulator
1761752_s_at	1198.2	P	0.000244	645.8	P	0.000732	635.7	P	0.00415	591.7	P	0.000732	604.9	P	0.000732	609.9	P	0.001221	MG1655_ileS_b0026 DB_XREF=PID:g2367096 SEG=NC_000913:+22391,25207 LEN=2816 DEF=isoleucine tRNA synthetase
1759196_s_at	2626.9	P	0.000244	2034.4	P	0.000244	1558.9	P	0.000244	1580.3	P	0.000244	2080.9	P	0.000244	2052.9	P	0.000244	MG1655_lspA_b0027 DB_XREF=PID:g1786210 SEG=NC_000913:+25207,25701 LEN=494 DEF=prolipoprotein signal peptidase (SPase II)
1763018_s_at	1016	P	0.000244	703.6	P	0.000244	665.2	P	0.000244	796.3	P	0.000244	742.3	P	0.000244	808.3	P	0.000244	MG1655_b0028 DB_XREF=PID:g1786211 SEG=NC_000913:+25826,26275 LEN=449 DEF=putative FKBX-type 16KD peptidyl-prolyl cis-trans isomerase
1764239_s_at	628.8	P	0.000732	576.9	P	0.001953	459	P	0.010742	643.6	P	0.01416	654.4	P	0.010742	684.9	P	0.005859	MG1655_b0029 DB_XREF=PID:g1786212 SEG=NC_000913:+26277,27227 LEN=950 DEF=LytB
1760878_s_at	55	P	0.030273	85.1	P	0.001221	73.5	P	0.000244	186.4	P	0.000732	152.6	P	0.000244	189.6	P	0.000244	MG1655_b0030 DB_XREF=PID:g1786213 SEG=NC_000913:+27293,28207 LEN=914 DEF=hypothetical protein
1768051_s_at	318.8	P	0.000244	670.9	P	0.000244	565.3	P	0.000244	362.7	P	0.000244	467	P	0.000244	501.3	P	0.000244	MG1655_dapB_b0031 DB_XREF=PID:g1786214 SEG=NC_000913:+28374,29195 LEN=821 DEF=dihydrodipicolinate reductase
1759939_s_at	376.6	P	0.000244	190.1	P	0.000244	147.9	P	0.000732	141	P	0.000244	175.9	P	0.001953	128.6	P	0.000244	MG1655_carA_b0032 DB_XREF=PID:g1786215 SEG=NC_000913:+29651,30799 LEN=1148 DEF=carbamoyl-phosphate synthetase, glutamine (small) subunit
1768145_s_at	137	P	0.001221	186.6	P	0.001221	240.5	P	0.00415	394.2	P	0.000732	455.6	P	0.000244	427.6	P	0.000244	MG1655_carB_b0033 DB_XREF=PID:g1786216 SEG=NC_000913:+30817,34038 LEN=3221 DEF=carbamoyl-phosphate synthase large subunit
1767637_s_at	102.2	P	0.000244	103.9	P	0.000244	146.9	P	0.000244	185.5	P	0.000244	140.5	P	0.000244	136.5	P	0.000244	MG1655_caiF_b0034 DB_XREF=PID:g1786218 SEG=NC_000913:+34195,34695 LEN=500 DEF=transcriptional regulator of cai operon
1766077_s_at	55.2	M	0.056152	125.6	M	0.056152	112.3	P	0.010742	129.1	P	0.008057	81.9	P	0.005859	87.2	M	0.056152	MG1655_caiE_b0035 DB_XREF=PID:g1786219 SEG=NC_000913:-34781,35392 LEN=611 DEF=possible synthesis of cofactor for carnitine racemase and dehydratase
1761497_s_at	34.9	P	0.000732	49.1	P	0.001953	67.9	P	0.000244	58.8	P	0.001953	44.2	P	0.005859	57.2	P	0.005859	MG1655_caiD_b0036 DB_XREF=PID:g1786220 SEG=NC_000913:-35377,36270 LEN=893 DEF=carnitine racemase
1762930_at	57.8	P	0.001953	74.6	P	0.00293	131.1	P	0.001953	132.7	P	0.001221	69	P	0.000732	42.4	P	0.001953	MG1655_caiC_b0037 DB_XREF=PID:g1786221 SEG=NC_000913:-36271,37839 LEN=1568 DEF=probable crotonobetainecarnitine-CoA ligase
1766861_at	104	P	0.000244	71.2	P	0.000244	83.7	P	0.000244	173.8	P	0.000244	76.7	P	0.000244	47.1	P	0.000244	MG1655_caiB_b0038 DB_XREF=PID:g1786222 SEG=NC_000913:-37898,39115 LEN=1217 DEF=l-carnitine dehydratase
1763429_s_at	102.9	P	0.001221	96.8	P	0.000244	109.7	P	0.000244	99.8	P	0.000244	123.9	P	0.000244	94.6	P	0.000732	MG1655_caiA_b0039 DB_XREF=PID:g1786223 SEG=NC_000913:-39244,40386 LEN=1142 DEF=probable carnitine operon oxidoreductase
1767194_s_at	56.1	P	0.005859	51.9	P	0.018555	109.3	P	0.001953	92.3	P	0.00415	73.8	P	0.005859	43	P	0.018555	MG1655_caiT_b0040 DB_XREF=PID:g1786224 SEG=NC_000913:-40417,41931 LEN=1514 DEF=probable carnitine transporter
1761291_s_at	4.2	A	0.904785	18.2	A	0.567627	3.5	A	0.943848	39.7	A	0.334473	17.2	A	0.567627	12.1	A	0.665527	MG1655_fixA_b0041 DB_XREF=PID:g1786225 SEG=NC_000913:+42367,43173 LEN=806 DEF=probable flavoprotein subunit, carnitine metabolism
1760251_s_at	45.6	A	0.171387	61.8	A	0.19458	106.6	A	0.149658	103.6	M	0.056152	114.3	A	0.111572	70.8	A	0.27417	MG1655_fixB_b0042 DB_XREF=PID:g1786226 SEG=NC_000913:+43188,44129 LEN=941 DEF=probable flavoprotein subunit, carnitine metabolism
1762110_s_at	5.5	A	0.398926	54	A	0.129639	85.3	A	0.149658	79	A	0.067627	110.9	A	0.111572	96	A	0.149658	MG1655_fixC_b0043 DB_XREF=PID:g1786227 SEG=NC_000913:+44180,45466 LEN=1286 DEF=flavoprotein; electron transport
1765511_s_at	12.3	A	0.080566	44.8	P	0.018555	71.4	P	0.046143	75	P	0.018555	88.2	P	0.030273	46.1	A	0.111572	MG1655_fixX_b0044 DB_XREF=PID:g1786228 SEG=NC_000913:+45463,45750 LEN=287 DEF=putative ferredoxin
1764123_s_at	16.7	A	0.303711	46.5	P	0.030273	81.6	P	0.010742	155.9	P	0.01416	60	A	0.19458	32.9	A	0.533936	MG1655_yaaU_b0045 DB_XREF=PID:g1786229 SEG=NC_000913:+45807,47138 LEN=1331 DEF=putative transport protein
1759881_s_at	100	P	0.030273	111.2	P	0.030273	136.2	P	0.030273	123.9	P	0.023926	134.6	P	0.030273	96.5	P	0.023926	MG1655_yabF_b0046 DB_XREF=PID:g1786231 SEG=NC_000913:+47246,47776 LEN=530 DEF=putative NAD(P)H oxidoreductase
1763100_s_at	58.2	P	0.005859	90.2	P	0.000732	132.4	P	0.000732	166.1	P	0.000732	162.8	P	0.000732	132.4	P	0.001221	MG1655_kefC_b0047 DB_XREF=PID:g1786232 SEG=NC_000913:+47769,49631 LEN=1862 DEF=K+ efflux antiporter, glutathione-regulated
1767038_s_at	723.8	P	0.000244	824.8	P	0.001221	888.2	P	0.00293	671.4	P	0.005859	746	P	0.018555	875.4	P	0.005859	MG1655_folA_b0048 DB_XREF=PID:g1786233 SEG=NC_000913:+49823,50302 LEN=479 DEF=dihydrofolate reductase type I; trimethoprim resistance
1762415_s_at	820.5	P	0.000244	550.2	P	0.000244	529.5	P	0.000732	368.3	P	0.00293	380.5	P	0.01416	328.1	P	0.005859	MG1655_apaH_b0049 DB_XREF=PID:g1786234 SEG=NC_000913:-50380,51222 LEN=842 DEF=diadenosine tetraphosphatase
1765262_s_at	1238.8	P	0.000244	804.4	P	0.000244	615.7	P	0.000244	408	P	0.000244	536	P	0.000244	424.3	P	0.000244	MG1655_apaG_b0050 DB_XREF=PID:g1786235 SEG=NC_000913:-51229,51606 LEN=377 DEF=orf, hypothetical protein
1769148_s_at	1919.3	P	0.000244	2076.5	P	0.000244	1344.2	P	0.000244	859.3	P	0.000244	859.9	P	0.000244	789	P	0.000244	MG1655_ksgA_b0051 DB_XREF=PID:g1786236 SEG=NC_000913:-51609,52430 LEN=821 DEF=S-adenosylmethionine-6-N,N-adenosyl (rRNA) dimethyltransferase
1768819_at	2038.2	P	0.000244	1251.5	P	0.000244	1252.2	P	0.000244	900.8	P	0.000244	920.9	P	0.000244	827.2	P	0.000244	MG1655_pdxA_b0052 DB_XREF=PID:g1786237 SEG=NC_000913:-52427,53416 LEN=989 DEF=pyridoxine biosynthesis
1764767_s_at	2936	P	0.000244	2673.2	P	0.000244	2378.1	P	0.000244	1886	P	0.000244	1905.4	P	0.000244	1969.8	P	0.000244	MG1655_surA_b0053 DB_XREF=PID:g1786238 SEG=NC_000913:-53416,54702 LEN=1286 DEF=survival protein
1760068_s_at	1231.4	P	0.000244	808.9	P	0.000244	687.8	P	0.000244	484.4	P	0.000244	527.3	P	0.001953	569.6	P	0.000732	MG1655_imp_b0054 DB_XREF=PID:g1786239 SEG=NC_000913:-54755,57109 LEN=2354 DEF=organic solvent tolerance
1767108_s_at	1003.2	P	0.000244	1111.2	P	0.000244	1311.7	P	0.000244	577.2	P	0.000244	612.2	P	0.000244	504.4	P	0.000244	MG1655_b0055 DB_XREF=PID:g1786241 SEG=NC_000913:+57364,58179 LEN=815 DEF=putative DNA binding protein
1763325_at	727.8	P	0.000244	565.6	P	0.000244	967.5	P	0.000244	597	P	0.000244	693.1	P	0.000244	556.6	P	0.000244	MG1655_yabP_b0056 DB_XREF=PID:g1786242 SEG=NC_000913:+58474,59124 LEN=650 DEF=orf, hypothetical protein
1766452_at	1109.9	P	0.000244	1334.6	P	0.000244	1278.9	P	0.000244	1801.1	P	0.000244	1427.5	P	0.000244	1634.3	P	0.000244	MG1655_yabQ_b0057 DB_XREF=PID:g1786243 SEG=NC_000913:+59121,59279 LEN=158 DEF=orf, hypothetical protein
1764559_s_at	455.3	P	0.000244	368	P	0.000244	292.8	P	0.000732	170.6	P	0.000732	171.9	P	0.000732	163.4	P	0.001221	MG1655_b0058 DB_XREF=PID:g1786244 SEG=NC_000913:-59687,60346 LEN=659 DEF=pseudouridylate synthase
1767289_s_at	675.6	P	0.000244	365.3	P	0.000732	219.3	P	0.01416	198.4	P	0.000244	256	P	0.00415	257.1	P	0.010742	MG1655_hepA_b0059 DB_XREF=PID:g1786245 SEG=NC_000913:-60358,63264 LEN=2906 DEF=probable ATP-dependent RNA helicase
1766231_at	205.9	P	0.000244	175.4	P	0.000244	227.5	P	0.000244	174.1	P	0.000244	130.6	P	0.000244	84.3	P	0.000244	MG1655_polB_b0060 DB_XREF=PID:g1786246 SEG=NC_000913:-63429,65780 LEN=2351 DEF=DNA polymerase II
1760236_s_at	41.5	P	0.00415	58.4	P	0.00293	87.1	P	0.001953	80.3	P	0.000244	106.5	P	0.001221	78.8	P	0.000244	MG1655_araD_b0061 DB_XREF=PID:g1786247 SEG=NC_000913:-65855,66550 LEN=695 DEF=L-ribulose-5-phosphate 4-epimerase
1760995_s_at	36.6	P	0.005859	53	P	0.00415	60.6	P	0.001221	101.3	P	0.000244	72.8	P	0.01416	35.4	P	0.001953	MG1655_araA_b0062 DB_XREF=PID:g1786248 SEG=NC_000913:-66835,68337 LEN=1502 DEF=L-arabinose isomerase
1761659_s_at	43.7	A	0.129639	61.6	A	0.111572	90.1	P	0.005859	131	P	0.000732	113.2	P	0.00415	128.7	P	0.030273	MG1655_araB_b0063 DB_XREF=PID:g1786249 SEG=NC_000913:-68348,70048 LEN=1700 DEF=L-ribulokinase
1766543_s_at	493.9	P	0.000244	403.1	P	0.000732	470.3	P	0.000244	808	P	0.000244	894.3	P	0.000244	911.2	P	0.000244	MG1655_araC_b0064 DB_XREF=PID:g1786251 SEG=NC_000913:+70387,71265 LEN=878 DEF=transcriptional regulator for ara operon
1768347_at	801.3	P	0.000244	995.3	P	0.000244	1450.7	P	0.000244	1310.4	P	0.000244	1143.4	P	0.000244	1127	P	0.000244	MG1655_yabI_b0065 DB_XREF=PID:g1786252 SEG=NC_000913:+71351,72115 LEN=764 DEF=orf, hypothetical protein
1765014_s_at	52.9	P	0.000244	118.7	P	0.000244	180.6	P	0.000244	102	P	0.000244	91.2	P	0.000244	67	P	0.000732	MG1655_yabJ_b0066 DB_XREF=PID:g1786253 SEG=NC_000913:-72229,72927 LEN=698 DEF=putative ATP-binding component of a transport system
1765229_s_at	81.5	P	0.000244	169.5	P	0.000244	237.3	P	0.000244	188.2	P	0.000732	121.6	P	0.000732	75	P	0.001953	MG1655_yabK_b0067 DB_XREF=PID:g1786254 SEG=NC_000913:-72911,74521 LEN=1610 DEF=putative transport system permease protein
1765751_s_at	160.7	P	0.000244	139.4	P	0.001221	177.2	P	0.000244	182.4	P	0.000732	147.3	P	0.001221	126.4	P	0.001953	MG1655_tbpA_b0068 DB_XREF=PID:g1786255 SEG=NC_000913:-74497,75480 LEN=983 DEF=thiamin-binding periplasmic protein
1768823_at	217.9	P	0.000244	129.3	P	0.000244	126.5	P	0.000244	140.2	P	0.000244	154.3	P	0.000244	106.9	P	0.000244	MG1655_yabN_b0069 DB_XREF=PID:g1786256 SEG=NC_000913:-75644,77299 LEN=1655 DEF=putative transport protein
1767941_at	349.4	P	0.000244	238.3	P	0.000244	292.9	P	0.000244	277.1	P	0.000244	212.1	P	0.000244	276.9	P	0.000244	MG1655_b0070 DB_XREF=PID:g1786257 SEG=NC_000913:+77621,78799 LEN=1178 DEF=putative transport protein
1766336_s_at	121	P	0.001953	58.5	P	0.000732	89.1	P	0.000244	2256.6	P	0.000244	2822.9	P	0.000244	2723.1	P	0.000244	MG1655_leuD_b0071 DB_XREF=PID:g1786258 SEG=NC_000913:-78848,79453 LEN=605 DEF=isopropylmalate isomerase subunit
1763663_s_at	204.6	P	0.000244	120.5	P	0.001953	128.8	P	0.000732	1872.5	P	0.000244	2332.6	P	0.000244	2315.9	P	0.000244	MG1655_leuC_b0072 DB_XREF=PID:g1786259 SEG=NC_000913:-79464,80864 LEN=1400 DEF=3-isopropylmalate isomerase (dehydratase) subunit
1762483_s_at	43.3	P	0.000244	10.7	A	0.633789	2	A	0.870361	513.7	P	0.000244	583.6	P	0.000244	583.1	P	0.000244	MG1655_leuB_b0073 DB_XREF=PID:g1786260 SEG=NC_000913:-80867,81961 LEN=1094 DEF=3-isopropylmalate dehydrogenase
1762133_s_at	260	P	0.018555	93.6	P	0.023926	103.6	P	0.023926	1542.8	P	0.005859	907.1	P	0.018555	944.3	P	0.018555	MG1655_leuA_b0074 DB_XREF=PID:g1786261 SEG=NC_000913:-81958,83529 LEN=1571 DEF=2-isopropylmalate synthase
1760294_s_at	416.4	P	0.000244	95.6	P	0.000244	174.3	P	0.000244	1474.3	P	0.000244	1457	P	0.000244	1466.2	P	0.000244	MG1655_leuL_b0075 DB_XREF=PID:g1786263 SEG=NC_000913:-83622,83708 LEN=86 DEF=leu operon leader peptide
1765512_s_at	40.1	P	0.001221	43.8	P	0.01416	53.7	P	0.030273	104.8	P	0.000244	62.9	P	0.018555	67.2	P	0.018555	MG1655_leuO_b0076 DB_XREF=PID:g1786264 SEG=NC_000913:+84191,85312 LEN=1121 DEF=probable transcriptional activator for leuABCD operon
1768673_at	203	P	0.000244	112	P	0.000732	154	P	0.000244	961.3	P	0.000244	1482	P	0.000244	1421.9	P	0.000244	MG1655_ilvI_b0077 DB_XREF=PID:g1786265 SEG=NC_000913:+85540,87354 LEN=1814 DEF=acetolactate synthase III, valine sensitive, large subunit
1759434_s_at	147.1	P	0.000244	85.2	P	0.000244	134.8	P	0.000244	855.1	P	0.000244	1301.4	P	0.000244	1406.6	P	0.000244	MG1655_ilvH_b0078 DB_XREF=PID:g1786266 SEG=NC_000913:+87357,87848 LEN=491 DEF=acetolactate synthase III, valine sensitive, small subunit
1763680_s_at	163	P	0.000244	123	P	0.000244	163.9	P	0.000244	470.5	P	0.000244	604.6	P	0.000244	566.7	P	0.000244	MG1655_fruL_b0079 DB_XREF=PID:g1786267 SEG=NC_000913:+87860,87946 LEN=86 DEF=fruR leader peptide
1760828_s_at	474.9	P	0.000244	412.5	P	0.000244	552.3	P	0.000244	681.5	P	0.000244	544.1	P	0.000244	510	P	0.000244	MG1655_fruR_b0080 DB_XREF=PID:g1786268 SEG=NC_000913:+88028,89032 LEN=1004 DEF=transcriptional repressor of fru operon and others
1763697_s_at	945.7	P	0.000244	785.1	P	0.000244	866.8	P	0.000244	599.3	P	0.000244	599.7	P	0.000244	693.7	P	0.000244	MG1655_yabB_b0081 DB_XREF=PID:g1786269 SEG=NC_000913:+89634,90092 LEN=458 DEF=orf, hypothetical protein
1763957_s_at	696.5	P	0.000244	757.7	P	0.000244	913.5	P	0.000244	406.6	P	0.000244	407.5	P	0.000732	417.9	P	0.000244	MG1655_yabC_b0082 DB_XREF=PID:g1786270 SEG=NC_000913:+90094,91035 LEN=941 DEF=putative apolipoprotein
1766174_s_at	626.9	P	0.000244	715.6	P	0.000244	866.6	P	0.000244	391.7	P	0.000244	377.5	P	0.000244	392.4	P	0.000244	MG1655_ftsL_b0083 DB_XREF=PID:g1786271 SEG=NC_000913:+91032,91397 LEN=365 DEF=cell division protein; ingrowth of wall at septum
1767626_s_at	442	P	0.000244	290.7	P	0.000244	435.5	P	0.000244	299.5	P	0.000732	378.8	P	0.000732	342.4	P	0.001953	MG1655_ftsI_b0084 DB_XREF=PID:g1786272 SEG=NC_000913:+91413,93179 LEN=1766 DEF=septum formation; penicillin-binding protein 3; peptidoglycan synthetase
1764061_s_at	338.8	P	0.000244	259	P	0.000244	310.3	P	0.000244	168.3	P	0.000244	208.2	P	0.000732	214.9	P	0.001221	CFT073_murE_c0103 DB_XREF=26246018 SEG=NC_004431:+96993,98480 LEN=1487 DEF=UDP-N-acetylmuramoylalanyl-D-glutamate--2,6-diaminopimelate ligase
1759615_s_at	439.4	P	0.000244	329.2	P	0.000244	365.1	P	0.000244	256	P	0.000244	279.5	P	0.000244	289.4	P	0.000244	MG1655_murF_b0086 DB_XREF=PID:g1786274 SEG=NC_000913:+94650,96008 LEN=1358 DEF=D-alanine:D-alanine-adding enzyme
1759922_s_at	673.9	P	0.000244	519.9	P	0.000244	560.2	P	0.000244	483.8	P	0.000244	425.5	P	0.000244	412	P	0.000244	MG1655_mraY_b0087 DB_XREF=PID:g1786275 SEG=NC_000913:+96002,97084 LEN=1082 DEF=phospho-N-acetylmuramoyl-pentapeptide transferase?
1767514_s_at	396.9	P	0.000244	215.9	P	0.000244	188.8	P	0.000244	189.6	P	0.000244	185.7	P	0.000244	177.5	P	0.000244	MG1655_murD_b0088 DB_XREF=PID:g1786276 SEG=NC_000913:+97087,98403 LEN=1316 DEF=UDP-N-acetylmuramoylalanine-D-glutamate ligase
1760898_s_at	1010.2	P	0.000244	733.2	P	0.000244	666.3	P	0.000244	565.4	P	0.000244	657.7	P	0.000244	664.9	P	0.000244	MG1655_ftsW_b0089 DB_XREF=PID:g1786277 SEG=NC_000913:+98403,99647 LEN=1244 DEF=cell division; membrane protein involved in shape determination
1759861_s_at	857.5	P	0.000244	505.6	P	0.000244	613.7	P	0.000732	421.1	P	0.000732	518.5	P	0.001953	541.6	P	0.001221	MG1655_murG_b0090 DB_XREF=PID:g1786278 SEG=NC_000913:+99644,100711 LEN=1067 DEF=UDP-N-acetylglucosamine:N-acetylmuramyl- (pentapeptide) pyrophosphoryl-undecaprenol N-acetylglucosamine transferase
1767504_s_at	825.5	P	0.000244	451.4	P	0.000244	530.2	P	0.000244	372.9	P	0.000244	509.6	P	0.000244	505	P	0.000244	MG1655_murC_b0091 DB_XREF=PID:g1786279 SEG=NC_000913:+100765,102240 LEN=1475 DEF=L-alanine adding enzyme, UDP-N-acetyl-muramate:alanine ligase
1763831_s_at	1249.1	P	0.000244	892.6	P	0.000244	937.5	P	0.000244	693.8	P	0.000244	923.7	P	0.000244	944.5	P	0.000244	MG1655_ddlB_b0092 DB_XREF=PID:g1786280 SEG=NC_000913:+102233,103153 LEN=920 DEF=D-alanine-D-alanine ligase B, affects cell division
1764724_s_at	1551.9	P	0.000244	1387.6	P	0.000244	1029.6	P	0.000244	1010	P	0.000244	1361.7	P	0.000244	1435	P	0.000244	MG1655_ftsQ_b0093 DB_XREF=PID:g1786281 SEG=NC_000913:+103155,103985 LEN=830 DEF=cell division protein; ingrowth of wall at septum
1763871_s_at	1521.1	P	0.023926	1259.4	P	0.023926	993.7	P	0.023926	934.8	P	0.023926	1266.3	P	0.023926	1475.9	P	0.023926	MG1655_ftsA_b0094 DB_XREF=PID:g1786282 SEG=NC_000913:+103982,105244 LEN=1262 DEF=ATP-binding cell division protein, septation process, complexes with FtsZ, associated with junctions of inner and outer membranes
1766411_s_at	1657.9	P	0.000244	1882.5	P	0.000244	1560.2	P	0.000244	1682.4	P	0.000244	1804.1	P	0.000244	2061.2	P	0.000244	MG1655_ftsZ_b0095 DB_XREF=PID:g1786284 SEG=NC_000913:+105305,106456 LEN=1151 DEF=cell division; forms circumferential ring; tubulin-like GTP-binding protein and GTPase
1764468_s_at	4119.3	P	0.000244	4087.6	P	0.000244	3589.9	P	0.000244	3528.3	P	0.000244	3548.4	P	0.000244	4121.4	P	0.000244	MG1655_lpxC_b0096 DB_XREF=PID:g1786285 SEG=NC_000913:+106557,107474 LEN=917 DEF=UDP-3-O-acyl N-acetylglucosamine deacetylase; lipid A biosynthesis
1759675_s_at	2215.4	P	0.000244	2194.2	P	0.000244	1571.5	P	0.000244	1112.1	P	0.000244	1384.2	P	0.000244	1280.3	P	0.000244	MG1655_yacA_b0097 DB_XREF=PID:g1786286 SEG=NC_000913:+107630,108217 LEN=587 DEF=orf, hypothetical protein
1764003_s_at	1578.3	P	0.000244	1915.4	P	0.000244	1457.2	P	0.000244	1104.1	P	0.000244	1229.1	P	0.000244	1333	P	0.000244	MG1655_secA_b0098 DB_XREF=PID:g1786287 SEG=NC_000913:+108279,110984 LEN=2705 DEF=preprotein translocase; secretion protein
1761339_s_at	306.3	P	0.000244	355.8	P	0.000244	435.2	P	0.000244	197.1	P	0.000244	269.8	P	0.000244	197	P	0.000244	MG1655_mutT_b0099 DB_XREF=PID:g1786288 SEG=NC_000913:+111044,111433 LEN=389 DEF=7,8-dihydro-8-oxoguanine-triphosphatase, prefers dGTP, causes AT-GC transversions
1764853_s_at	551.5	P	0.000244	815	P	0.000244	794.1	P	0.000244	363	P	0.000244	318.2	P	0.000244	293.7	P	0.000244	MG1655_b0100 DB_XREF=PID:g1786289 SEG=NC_000913:-111564,111698 LEN=134 DEF=orf, hypothetical protein
1762811_s_at	930.6	P	0.000244	1208.7	P	0.000244	960.8	P	0.000244	555.5	P	0.000244	561.4	P	0.000244	521.5	P	0.000244	MG1655_yacG_b0101 DB_XREF=PID:g1786290 SEG=NC_000913:-111649,111846 LEN=197 DEF=orf, hypothetical protein
1767921_s_at	1337.2	P	0.000244	1319.3	P	0.000244	1238.4	P	0.000244	803.2	P	0.000244	843.6	P	0.000244	747	P	0.000244	MG1655_yacF_b0102 DB_XREF=PID:g1786291 SEG=NC_000913:-111856,112599 LEN=743 DEF=orf, hypothetical protein
1768349_s_at	829.9	P	0.000244	640.2	P	0.000244	688.3	P	0.000244	619	P	0.000244	525.6	P	0.000244	621.5	P	0.000244	MG1655_yacE_b0103 DB_XREF=PID:g1786292 SEG=NC_000913:-112599,113219 LEN=620 DEF=putative DNA repair protein
1764272_s_at	744.4	P	0.000244	1174.8	P	0.000244	1041.7	P	0.000244	415.2	P	0.000244	712.7	P	0.000244	775.9	P	0.000244	MG1655_guaC_b0104 DB_XREF=PID:g1786293 SEG=NC_000913:+113444,114487 LEN=1043 DEF=GMP reductase
1761899_s_at	492.1	P	0.000244	701.7	P	0.000244	824.5	P	0.000244	635.9	P	0.000244	509.7	P	0.000244	467.1	P	0.000244	MG1655_b0105 DB_XREF=PID:g1786294 SEG=NC_000913:-114407,114514 LEN=107 DEF=orf, hypothetical protein
1761645_s_at	128.4	P	0.010742	134.1	P	0.005859	153.4	P	0.023926	123.6	P	0.01416	134.8	P	0.023926	80.1	A	0.067627	MG1655_hofC_b0106 DB_XREF=PID:g1786295 SEG=NC_000913:-114522,115724 LEN=1202 DEF=putative integral membrane protein involved in biogenesis of fimbriae, protein transport, DNA uptake
1764494_at	125.2	P	0.037598	170.8	P	0.023926	72.7	P	0.023926	66.8	M	0.056152	99.2	A	0.067627	67.7	A	0.067627	MG1655_hofB_b0107 DB_XREF=PID:g1786296 SEG=NC_000913:-115714,117099 LEN=1385 DEF=putative integral membrane protein involved in biogenesis of fimbriae, protein transport, DNA uptake
1767422_s_at	54.2	P	0.000732	89.5	P	0.001953	67.2	P	0.000244	61.7	P	0.000244	69	P	0.000244	43	P	0.018555	MG1655_ppdD_b0108 DB_XREF=PID:g1786297 SEG=NC_000913:-117109,117549 LEN=440 DEF=prelipin peptidase dependent protein
1765836_s_at	477.7	P	0.00293	853.1	P	0.001953	739.3	P	0.008057	281	P	0.008057	296.4	P	0.01416	363.4	P	0.008057	MG1655_nadC_b0109 DB_XREF=PID:g1786299 SEG=NC_000913:-117752,118645 LEN=893 DEF=quinolinate phosphoribosyltransferase
1764251_s_at	554.1	P	0.000732	827.3	P	0.000732	767.4	P	0.000244	812.2	P	0.000732	851.7	P	0.000732	862	P	0.000732	MG1655_ampD_b0110 DB_XREF=PID:g1786300 SEG=NC_000913:+118733,119284 LEN=551 DEF=regulates ampC
1762135_s_at	345.6	P	0.023926	447	P	0.008057	502.5	P	0.01416	395.9	P	0.001221	482.6	P	0.00293	487	P	0.001221	MG1655_ampE_b0111 DB_XREF=PID:g1786301 SEG=NC_000913:+119281,120135 LEN=854 DEF=regulates ampC
1765703_at	287.4	P	0.000244	241.3	P	0.000244	327.4	P	0.000244	554.1	P	0.000244	1135.9	P	0.000244	1491.5	P	0.000244	MG1655_aroP_b0112 DB_XREF=PID:g1786302 SEG=NC_000913:-120178,121551 LEN=1373 DEF=aromatic amino acid transport protein
1766514_s_at	1450.8	P	0.000244	540.7	P	0.000244	762	P	0.000244	478.6	P	0.000244	1038.9	P	0.000244	1063.6	P	0.000244	MG1655_pdhR_b0113 DB_XREF=PID:g1786303 SEG=NC_000913:+122092,122856 LEN=764 DEF=transcriptional regulator for pyruvate dehydrogenase complex
1761664_s_at	4869.7	P	0.000244	5559.1	P	0.000244	4014.6	P	0.000244	3014.9	P	0.000244	4346.6	P	0.000244	4982.5	P	0.000244	MG1655_aceE_b0114 DB_XREF=PID:g1786304 SEG=NC_000913:+123017,125680 LEN=2663 DEF=pyruvate dehydrogenase (decarboxylase component)
1766583_s_at	4512.9	P	0.000244	4765.5	P	0.000244	3593.5	P	0.000244	1500.8	P	0.000244	2957.6	P	0.000244	3267.4	P	0.000244	EDL933_aceF_Z0125 DB_XREF=GI:12512824 SEG=NC_002655:+130185,132077 LEN=1892 DEF=pyruvate dehydrogenase (dihydrolipoyltransacetylase component)
1762392_s_at	4666.4	P	0.000244	6665.9	P	0.000244	5051.8	P	0.000244	3717.9	P	0.000244	5285.3	P	0.000244	5323.2	P	0.000244	MG1655_lpdA_b0116 DB_XREF=PID:g1786307 SEG=NC_000913:+127912,129336 LEN=1424 DEF=lipoamide dehydrogenase (NADH); component of 2-oxodehydrogenase and pyruvate complexes; L-protein of glycine cleavage complex
1766759_s_at	39.6	A	0.149658	48.1	A	0.111572	53.9	A	0.067627	78.2	P	0.046143	53.7	P	0.037598	47.3	A	0.149658	MG1655_yacH_b0117 DB_XREF=PID:g1786308 SEG=NC_000913:-129407,131260 LEN=1853 DEF=putative membrane protein
1768073_at	586.3	P	0.000244	1499.8	P	0.000244	1150.5	P	0.000244	2882.2	P	0.000244	3696	P	0.000244	4016.9	P	0.000244	MG1655_acnB_b0118 DB_XREF=PID:g2367097 SEG=NC_000913:+131615,134212 LEN=2597 DEF=aconitate hydrase B
1766764_s_at	424.3	P	0.000244	673.9	P	0.000244	873.1	P	0.000244	401.4	P	0.000732	521.6	P	0.000732	565.9	P	0.000244	MG1655_yacL_b0119 DB_XREF=PID:g1786310 SEG=NC_000913:+134340,134750 LEN=410 DEF=orf, hypothetical protein
1760316_s_at	650.7	P	0.000244	1000.3	P	0.000244	1073.1	P	0.000244	609.5	P	0.000244	807.1	P	0.000244	755.5	P	0.000244	MG1655_speD_b0120 DB_XREF=PID:g1786311 SEG=NC_000913:-134788,135582 LEN=794 DEF=S-adenosylmethionine decarboxylase
1764814_s_at	1626.8	P	0.000244	2166.5	P	0.000244	1865.1	P	0.000244	1367	P	0.000244	1755	P	0.000244	1638.2	P	0.000244	MG1655_speE_b0121 DB_XREF=PID:g1786312 SEG=NC_000913:-135598,136464 LEN=866 DEF=spermidine synthase = putrescine aminopropyltransferase
1760892_s_at	1577.1	P	0.000244	1276.5	P	0.000244	1200.8	P	0.000244	702.8	P	0.000244	712.1	P	0.000244	565.3	P	0.000244	SAKAI_ECs0126 DB_XREF=38703845 SEG=NC_002695:-140942,141289 LEN=347 DEF=hypothetical protein
1767706_at	177.6	P	0.00415	218.8	P	0.01416	208.9	P	0.01416	433.3	P	0.001953	573.9	P	0.001221	691	P	0.000732	MG1655_b0123 DB_XREF=PID:g1786314 SEG=NC_000913:+137083,138633 LEN=1550 DEF=hypothetical protein
1762774_s_at	476.4	P	0.000244	896.4	P	0.000244	889.6	P	0.000244	343.1	P	0.001221	371.1	P	0.000732	341.9	P	0.001953	MG1655_gcd_b0124 DB_XREF=PID:g1786316 SEG=NC_000913:-138835,141225 LEN=2390 DEF=glucose dehydrogenase
1765864_s_at	2487.6	P	0.000244	3181.9	P	0.000244	2207.3	P	0.000244	1337.3	P	0.000244	1146.6	P	0.000244	1313.4	P	0.000244	MG1655_hpt_b0125 DB_XREF=PID:g1786317 SEG=NC_000913:+141419,141967 LEN=548 DEF=hypoxanthine phosphoribosyltransferase
1764140_s_at	848.4	P	0.000244	2625	P	0.000244	2109.4	P	0.000244	1128.3	P	0.000244	1455.7	P	0.000244	1323.4	P	0.000244	MG1655_yadF_b0126 DB_XREF=PID:g1786318 SEG=NC_000913:-142008,142670 LEN=662 DEF=putative carbonic anhdrase (EC 4.2.1.1)
1759188_s_at	1211.6	P	0.000244	576.2	P	0.001221	517.6	P	0.001953	746.7	P	0.001221	618.9	P	0.00293	696.1	P	0.001953	EDL933_yadG_Z0138 DB_XREF=GI:12512842 SEG=NC_002655:+147152,148078 LEN=926 DEF=putative ATP-binding component of a transport system
1769090_s_at	704.3	P	0.000244	414.4	P	0.000244	388.5	P	0.000244	453.5	P	0.000244	368.4	P	0.000244	386.4	P	0.000244	MG1655_yadH_b0128 DB_XREF=PID:g1786320 SEG=NC_000913:+143702,144472 LEN=770 DEF=orf, hypothetical protein
1768724_s_at	422.1	P	0.000244	297.6	P	0.000732	366.5	P	0.000244	505.1	P	0.000732	367.2	P	0.000244	402.1	P	0.000732	MG1655_yadI_b0129 DB_XREF=PID:g1786321 SEG=NC_000913:+144577,145017 LEN=440 DEF=putative PTS enzyme II B component
1760840_s_at	252.9	P	0.000244	181.7	P	0.000732	270.6	P	0.000732	165.5	P	0.000244	175.5	P	0.001221	159.4	P	0.001221	CFT073_yadE_c0159 DB_XREF=26246070 SEG=NC_004431:+155286,156515 LEN=1229 DEF=Hypothetical protein yadE precursor
1765227_s_at	1871.6	P	0.000244	1962.2	P	0.000244	1988	P	0.000244	1646.8	P	0.000244	1393.7	P	0.000244	1552.7	P	0.000244	MG1655_panD_b0131 DB_XREF=PID:g1786323 SEG=NC_000913:-146314,146694 LEN=380 DEF=aspartate 1-decarboxylase
1764265_s_at	71.2	P	0.005859	76.5	P	0.010742	119.5	P	0.00415	80.1	P	0.001953	87	P	0.01416	36.3	M	0.056152	MG1655_yadD_b0132 DB_XREF=PID:g1786324 SEG=NC_000913:+146968,147870 LEN=902 DEF=orf, hypothetical protein
1768379_s_at	946.3	P	0.000732	1211.9	P	0.001221	1061.5	P	0.001221	1058.5	P	0.000244	1081.1	P	0.000244	1083.7	P	0.000732	MG1655_panC_b0133 DB_XREF=PID:g1786325 SEG=NC_000913:-147944,148795 LEN=851 DEF=pantothenate synthetase
1768008_at	552.9	P	0.001221	681.4	P	0.00415	687	P	0.000732	608.1	P	0.008057	737.2	P	0.010742	651.3	P	0.01416	MG1655_panB_b0134 DB_XREF=PID:g1786326 SEG=NC_000913:-148807,149601 LEN=794 DEF=3-methyl-2-oxobutanoate hydroxymethyltransferase
1760987_at	60.5	P	0.001221	69.7	P	0.001953	85.2	P	0.000244	77.3	P	0.001221	64.5	P	0.00415	35.7	P	0.005859	MG1655_yadC_b0135 DB_XREF=PID:g1786328 SEG=NC_000913:-149715,150953 LEN=1238 DEF=putative fimbrial-like protein
1764142_at	40.6	P	0.000732	66.1	P	0.001953	98.8	P	0.000244	115.9	P	0.000244	119.2	P	0.000732	62.9	P	0.000244	MG1655_yadK_b0136 DB_XREF=PID:g1786329 SEG=NC_000913:-151003,151599 LEN=596 DEF=putative fimbrial protein
1764517_at	45.7	P	0.000244	63.6	P	0.001221	67.3	P	0.001221	78.4	P	0.000244	63.3	P	0.001221	84.9	P	0.000244	MG1655_yadL_b0137 DB_XREF=PID:g1786330 SEG=NC_000913:-151626,152231 LEN=605 DEF=putative fimbrial protein
1769081_at	24.7	P	0.001953	39.3	P	0.000244	48.9	P	0.000244	57.4	P	0.000244	53.7	P	0.000244	30.7	P	0.000244	MG1655_yadM_b0138 DB_XREF=PID:g1786331 SEG=NC_000913:-152243,152854 LEN=611 DEF=putative fimbrial-like protein
1766068_at	18	P	0.008057	32	P	0.008057	42.3	P	0.001953	60.2	P	0.000732	36	P	0.000732	31.6	P	0.010742	MG1655_htrE_b0139 DB_XREF=PID:g1786332 SEG=NC_000913:-152829,155426 LEN=2597 DEF=probable outer membrane porin protein involved in fimbrial assembly
1768695_at	26.3	P	0.010742	49.5	P	0.001953	56.7	P	0.001221	85.6	P	0.000732	65.7	P	0.001953	37.6	P	0.005859	MG1655_ecpD_b0140 DB_XREF=PID:g1786333 SEG=NC_000913:-155461,156201 LEN=740 DEF=probable pilin chaperone similar to PapD
1764326_at	99.1	P	0.01416	196.3	P	0.023926	159.6	P	0.023926	116.6	P	0.018555	83.7	P	0.030273	56	A	0.067627	MG1655_yadN_b0141 DB_XREF=PID:g1786334 SEG=NC_000913:-156299,156883 LEN=584 DEF=putative fimbrial-like protein
1762079_at	199.7	P	0.000244	245.3	P	0.000244	315.9	P	0.000244	176.5	P	0.000244	164.9	P	0.000732	83.6	P	0.000732	MG1655_folK_b0142 DB_XREF=PID:g1786335 SEG=NC_000913:-157253,157732 LEN=479 DEF=7,8-dihydro-6-hydroxymethylpterin- pyrophosphokinase
1759425_s_at	1625	P	0.000244	1108.7	P	0.000244	998.5	P	0.000244	603.5	P	0.000244	557.8	P	0.000732	501.7	P	0.000732	MG1655_pcnB_b0143 DB_XREF=PID:g1786336 SEG=NC_000913:-157729,159093 LEN=1364 DEF=poly(A) polymerase I
1767418_at	215.7	P	0.000732	124	P	0.001953	185.1	P	0.001953	132.8	P	0.000732	92.9	P	0.001953	71.7	P	0.00415	MG1655_yadB_b0144 DB_XREF=PID:g1786337 SEG=NC_000913:-159186,160112 LEN=926 DEF=putative tRNA synthetase
1767574_s_at	1635	P	0.000244	2130.8	P	0.000244	1877.2	P	0.000244	1520.5	P	0.000244	2379.2	P	0.000244	2181.7	P	0.000244	MG1655_dksA_b0145 DB_XREF=PID:g1786338 SEG=NC_000913:-160149,160604 LEN=455 DEF=dnaK suppressor protein
1762751_s_at	811.2	P	0.000244	1234.7	P	0.000244	1234	P	0.000732	556.9	P	0.00293	819.4	P	0.000244	1299.4	P	0.001953	MG1655_sfsA_b0146 DB_XREF=PID:g1786340 SEG=NC_000913:-160782,161486 LEN=704 DEF=probable regulator for maltose metabolism
1762338_s_at	230.3	P	0.000244	325.1	P	0.000244	244.6	P	0.000244	146.5	P	0.001221	143.3	P	0.001221	116.6	P	0.000732	MG1655_b0147 DB_XREF=PID:g1786341 SEG=NC_000913:-161501,162040 LEN=539 DEF=hypothetical protein
1759411_at	171.1	P	0.000244	112.1	P	0.000732	123.7	P	0.000732	107.5	P	0.001953	97.5	P	0.001221	120.6	P	0.001221	MG1655_hrpB_b0148 DB_XREF=PID:g1786342 SEG=NC_000913:+162060,164534 LEN=2474 DEF=helicase, ATP-dependent
1769279_s_at	739.4	P	0.001953	655.7	P	0.010742	544.6	P	0.008057	345.7	P	0.01416	354.9	P	0.018555	353.1	P	0.018555	MG1655_mrcB_b0149 DB_XREF=PID:g1786343 SEG=NC_000913:+164730,167264 LEN=2534 DEF=peptidoglycan synthetase; penicillin-binding protein 1B
1762671_s_at	645.4	P	0.000244	771.3	P	0.000244	648.2	P	0.000244	127.1	P	0.000732	455.8	P	0.000244	497.3	P	0.000244	MG1655_fhuA_b0150 DB_XREF=PID:g1786344 SEG=NC_000913:+167484,169727 LEN=2243 DEF=outer membrane protein receptor for ferrichrome, colicin M, and phages T1, T5, and phi80
1761740_s_at	562.3	P	0.000244	529.4	P	0.000244	470.9	P	0.000244	221.2	P	0.000244	355.9	P	0.000244	330.4	P	0.000244	MG1655_fhuC_b0151 DB_XREF=PID:g1786345 SEG=NC_000913:+169778,170575 LEN=797 DEF=ATP-binding component of hydroxymate-dependent iron transport
1762922_s_at	191.6	P	0.000244	133.9	P	0.000244	160.7	P	0.001221	69.4	P	0.000244	173.2	P	0.001953	166.8	P	0.001953	MG1655_fhuD_b0152 DB_XREF=PID:g1786346 SEG=NC_000913:+170575,171465 LEN=890 DEF=hydroxamate-dependent iron uptake, cytoplasmic membrane component
1766821_s_at	237.6	P	0.000244	112.5	P	0.00415	106.5	P	0.001221	68.4	P	0.005859	93.5	P	0.000244	109.9	P	0.00415	MG1655_fhuB_b0153 DB_XREF=PID:g1786347 SEG=NC_000913:+171462,173444 LEN=1982 DEF=hydroxamate-dependent iron uptake, cytoplasmic membrane component
1763723_s_at	709.6	P	0.000244	800.7	P	0.000244	642.6	P	0.000244	559.6	P	0.000244	705.2	P	0.000244	768.7	P	0.000244	MG1655_hemL_b0154 DB_XREF=PID:g1786349 SEG=NC_000913:-173602,174882 LEN=1280 DEF=glutamate-1-semialdehyde aminotransferase (aminomutase)
1760601_s_at	444.1	P	0.000244	289.9	P	0.000244	343.6	P	0.000244	347.9	P	0.000244	299.4	P	0.000244	281.4	P	0.000244	MG1655_yadQ_b0155 DB_XREF=PID:g1786350 SEG=NC_000913:+175107,176528 LEN=1421 DEF=putative channel transporter
1762554_s_at	1391.6	P	0.000244	1212.5	P	0.000244	1433.1	P	0.000244	1108.2	P	0.000244	1034.5	P	0.000244	1089.5	P	0.000244	MG1655_yadR_b0156 DB_XREF=PID:g1786351 SEG=NC_000913:+176610,176954 LEN=344 DEF=orf, hypothetical protein
1762915_s_at	506.4	P	0.000244	347.8	P	0.001953	317.2	P	0.001953	283.7	P	0.001221	290.9	P	0.00293	287.7	P	0.001221	MG1655_yadS_b0157 DB_XREF=PID:g1786352 SEG=NC_000913:-177001,177624 LEN=623 DEF=orf, hypothetical protein
1761093_s_at	411.3	P	0.000244	345.4	P	0.000244	224.4	P	0.000244	233.4	P	0.000732	296.2	P	0.000244	199.2	P	0.001221	MG1655_yadT_b0158 DB_XREF=PID:g1786353 SEG=NC_000913:-177662,178462 LEN=800 DEF=orf, hypothetical protein
1765885_s_at	816.5	P	0.000244	1568.1	P	0.000244	1025.3	P	0.000244	803.3	P	0.000244	967.9	P	0.000244	1055.3	P	0.000244	MG1655_pfs_b0159 DB_XREF=PID:g1786354 SEG=NC_000913:-178455,179153 LEN=698 DEF=orf, hypothetical protein
1764833_s_at	186.1	P	0.000244	237.8	P	0.000244	274.5	P	0.000244	287.1	P	0.000244	295.8	P	0.000244	309.5	P	0.000244	MG1655_dgt_b0160 DB_XREF=PID:g1786355 SEG=NC_000913:+179237,180754 LEN=1517 DEF=deoxyguanosine triphosphate triphosphohydrolase
1760969_s_at	348.2	P	0.000244	537.3	P	0.000244	525.2	P	0.000244	539.7	P	0.000244	392.1	P	0.000244	431	P	0.000244	MG1655_b0161 DB_XREF=PID:g1786356 SEG=NC_000913:+180884,182308 LEN=1424 DEF=periplasmic serine protease Do; heat shock protein HtrA
1761436_s_at	172.4	P	0.000244	163.4	P	0.000244	193	P	0.000244	795.2	P	0.000244	750.5	P	0.000244	822.1	P	0.000244	MG1655_b0162 DB_XREF=PID:g1786357 SEG=NC_000913:+182445,183620 LEN=1175 DEF=hypothetical protein
1769151_s_at	1154.8	P	0.00415	1306.3	P	0.008057	1394.2	P	0.008057	1728.7	P	0.005859	2376.7	P	0.005859	2435.8	P	0.00415	MG1655_yaeH_b0163 DB_XREF=PID:g1786359 SEG=NC_000913:-183709,184095 LEN=386 DEF=putative structural protein
1761181_at	207.1	P	0.000732	153.9	P	0.001953	187.4	P	0.001221	180.6	P	0.000244	193.4	P	0.001221	142	P	0.000732	MG1655_yaeI_b0164 DB_XREF=PID:g1786360 SEG=NC_000913:-184257,185000 LEN=743 DEF=orf, hypothetical protein
1766389_at	227.6	P	0.000732	274.2	P	0.001953	300.2	P	0.00415	211	P	0.00415	215.1	P	0.00415	118.6	P	0.01416	MG1655_b0165 DB_XREF=PID:g1786361 SEG=NC_000913:-184987,185118 LEN=131 DEF=orf, hypothetical protein
1761844_s_at	1792.7	P	0.000244	2799.1	P	0.000244	2590.5	P	0.000244	2139	P	0.000244	2792	P	0.000244	2871	P	0.000244	MG1655_dapD_b0166 DB_XREF=PID:g1786362 SEG=NC_000913:-185123,185947 LEN=824 DEF=2,3,4,5-tetrahydropyridine-2-carboxylate N-succinyltransferase
1767370_s_at	504.3	P	0.000244	414.9	P	0.000244	495.3	P	0.000244	431.6	P	0.000244	474.7	P	0.000244	432.7	P	0.000244	MG1655_glnD_b0167 DB_XREF=PID:g1786363 SEG=NC_000913:-185978,188650 LEN=2672 DEF=protein PII; uridylyltransferase acts on regulator of glnA
1759573_s_at	2071.9	P	0.00415	3117.9	P	0.000732	2832.7	P	0.008057	1022.7	P	0.018555	1424.8	P	0.005859	1612.3	P	0.00415	MG1655_map_b0168 DB_XREF=PID:g1786364 SEG=NC_000913:-188712,189506 LEN=794 DEF=methionine aminopeptidase
1765214_s_at	7188.8	P	0.000244	12524.2	P	0.000244	9859.7	P	0.000244	8173.4	P	0.000244	8845.3	P	0.000244	10491.9	P	0.000244	MG1655_t44_b4414 SEG=NC_000913:+189712,189847 LEN=135
1768873_s_at	5380	P	0.000244	8120.3	P	0.000244	6264.2	P	0.000244	4932	P	0.000244	5125.1	P	0.000244	6272.4	P	0.000244	MG1655_rpsB_b0169 DB_XREF=PID:g1786365 SEG=NC_000913:+189874,190599 LEN=725 DEF=30S ribosomal subunit protein S2
1761522_s_at	4911.9	P	0.000244	8157.2	P	0.000244	6660.3	P	0.000244	4445.9	P	0.000244	5288.6	P	0.000244	5573	P	0.000244	MG1655_tsf_b0170 DB_XREF=PID:g1786366 SEG=NC_000913:+190857,191708 LEN=851 DEF=protein chain elongation factor EF-Ts
1762994_s_at	1939.4	P	0.000244	2446.2	P	0.000244	1934.1	P	0.000244	971.8	P	0.000244	965.5	P	0.000244	1112.4	P	0.000244	MG1655_pyrH_b0171 DB_XREF=PID:g1786367 SEG=NC_000913:+191855,192580 LEN=725 DEF=uridylate kinase
1765272_s_at	3346.3	P	0.000244	4949.6	P	0.000244	4290.6	P	0.000244	2265.4	P	0.000244	2378	P	0.000244	2563.4	P	0.000244	MG1655_frr_b0172 DB_XREF=PID:g1786368 SEG=NC_000913:+192872,193429 LEN=557 DEF=ribosome releasing factor
1762196_s_at	655.3	P	0.000244	452.2	P	0.000244	423.5	P	0.000244	381.6	P	0.000244	268.3	P	0.001221	246.2	P	0.001221	MG1655_b0173 DB_XREF=PID:g1786369 SEG=NC_000913:+193521,194717 LEN=1196 DEF=putative ATP-binding component of a transport system
1763389_s_at	1983.9	P	0.000244	1391.4	P	0.000244	1402.4	P	0.000244	1329.5	P	0.000244	1054.9	P	0.000244	1249.2	P	0.000244	MG1655_b0174 DB_XREF=PID:g1786371 SEG=NC_000913:+194903,195664 LEN=761 DEF=hypothetical protein
1760763_s_at	1827.3	P	0.000244	1370.3	P	0.000244	873.9	P	0.000244	918.9	P	0.000244	839.2	P	0.000244	935.2	P	0.000244	MG1655_cdsA_b0175 DB_XREF=PID:g1786372 SEG=NC_000913:+195785,196534 LEN=749 DEF=CDP-diglyceride synthetase
1768561_s_at	2320.5	P	0.000244	1932.9	P	0.000244	1767.2	P	0.000244	1237.7	P	0.000244	1255.7	P	0.000244	1380.1	P	0.000244	MG1655_yaeL_b0176 DB_XREF=PID:g1786373 SEG=NC_000913:+196546,197898 LEN=1352 DEF=hypothetical protein
1766558_s_at	2579	P	0.000244	2270.3	P	0.000244	1714.4	P	0.000244	1589.6	P	0.000244	1941.9	P	0.000244	2059.9	P	0.000244	MG1655_yaeT_b0177 DB_XREF=PID:g1786374 SEG=NC_000913:+197928,200360 LEN=2432 DEF=putative outer membrane antigen
1760052_s_at	3485.6	P	0.000244	6114.3	P	0.000244	5084.7	P	0.000244	3887.6	P	0.000244	4529.1	P	0.000244	5067.8	P	0.000244	MG1655_hlpA_b0178 DB_XREF=PID:g1786375 SEG=NC_000913:+200482,200967 LEN=485 DEF=periplasmic molecular chaperone for outer membrane proteins
1769020_s_at	2382.9	P	0.000244	2829.7	P	0.000244	2401.4	P	0.000244	2089.6	P	0.000244	1926.1	P	0.000244	1963.6	P	0.000244	MG1655_lpxD_b0179 DB_XREF=PID:g1786376 SEG=NC_000913:+200971,201996 LEN=1025 DEF=UDP-3-O-(3-hydroxymyristoyl)-glucosamine N-acyltransferase
1763336_s_at	2832.5	P	0.000244	3846.9	P	0.000244	3209.8	P	0.000244	2722.8	P	0.000244	2850	P	0.000244	3292.4	P	0.000244	MG1655_fabZ_b0180 DB_XREF=PID:g1786377 SEG=NC_000913:+202101,202556 LEN=455 DEF=(3R)-hydroxymyristol acyl carrier protein dehydratase
1762140_s_at	1670	P	0.000244	1738.6	P	0.000244	1520.5	P	0.000244	1123.6	P	0.000244	1320.8	P	0.000244	1185.3	P	0.000244	MG1655_lpxA_b0181 DB_XREF=PID:g1786378 SEG=NC_000913:+202560,203348 LEN=788 DEF=UDP-N-acetylglucosamine acetyltransferase; lipid A biosynthesis
1760263_s_at	1000.3	P	0.000244	482.2	P	0.000732	386.6	P	0.000244	509.8	P	0.000244	520.9	P	0.000244	512	P	0.000244	MG1655_lpxB_b0182 DB_XREF=PID:g1786379 SEG=NC_000913:+203348,204496 LEN=1148 DEF=tetraacyldisaccharide-1-P; lipid A biosynthesis, penultimate step
1765273_s_at	967.6	P	0.000244	517.7	P	0.000244	420.3	P	0.000244	449.9	P	0.000244	517.5	P	0.000244	422.8	P	0.000244	MG1655_rnhB_b0183 DB_XREF=PID:g1786380 SEG=NC_000913:+204493,205089 LEN=596 DEF=RNAse HII, degrades RNA of DNA-RNA hybrids
1767710_s_at	787.6	P	0.001953	453.2	P	0.005859	443.6	P	0.008057	385.9	P	0.010742	340.9	P	0.01416	361.6	P	0.010742	MG1655_dnaE_b0184 DB_XREF=PID:g1786381 SEG=NC_000913:+205126,208608 LEN=3482 DEF=DNA polymerase III, alpha subunit
1760560_s_at	2083.2	P	0.000244	2439.2	P	0.000244	2214.9	P	0.000244	1433.9	P	0.000244	1796.4	P	0.000244	1837.7	P	0.000244	MG1655_accA_b0185 DB_XREF=PID:g1786382 SEG=NC_000913:+208621,209580 LEN=959 DEF=acetylCoA carboxylase, carboxytransferase component, alpha subunit
1763159_s_at	131.5	P	0.000732	91.6	P	0.000244	100.5	P	0.000732	117	P	0.000244	109.2	P	0.000244	105.6	P	0.000244	MG1655_ldcC_b0186 DB_XREF=PID:g1786384 SEG=NC_000913:+209679,211820 LEN=2141 DEF=lysine decarboxylase 2, constitutive
1763908_s_at	296	P	0.001221	304.2	P	0.005859	351.4	P	0.001221	370.6	P	0.001221	377.2	P	0.00293	263.9	P	0.023926	MG1655_yaeR_b0187 DB_XREF=PID:g1786385 SEG=NC_000913:+211850,212266 LEN=416 DEF=orf, hypothetical protein
1763762_s_at	281.1	P	0.000244	224.5	P	0.000732	256.6	P	0.00293	161.7	P	0.001221	167	P	0.000732	142.7	P	0.005859	MG1655_tilS_b0188 DB_XREF=PID:g1786386 SEG=NC_000913:+212331,213629 LEN=1298 DEF=tRNA(Ile)-lysidine synthetase
1762109_s_at	359.6	P	0.000244	414	P	0.000244	450.7	P	0.000244	287.4	P	0.000732	456.6	P	0.000244	400	P	0.000244	MG1655_b0189 DB_XREF=PID:g1786387 SEG=NC_000913:-213678,213938 LEN=260 DEF=hypothetical protein
1759531_s_at	923.4	P	0.000244	1202.4	P	0.000244	1236.1	P	0.000244	1080.6	P	0.000244	917.1	P	0.000244	1336.5	P	0.000244	MG1655_yaeP_b4406 DB_XREF=SWISS-PROT:P52099 SEG=NC_000913:-213925,214125 LEN=200 DEF=conserved hypothetical protein
1764162_s_at	657.8	P	0.000732	770.2	P	0.000244	756	P	0.000244	549.6	P	0.000244	544.3	P	0.000732	517.7	P	0.000732	EDL933_Z0202 DB_XREF=GI:12512921 SEG=NC_002655:+217636,218094 LEN=458 DEF=orf; Unknown function
1759166_s_at	463.8	P	0.000244	346.7	P	0.000732	486.7	P	0.000244	275.6	P	0.000244	405.7	P	0.000244	250.6	P	0.001953	MG1655_yaeJ_b0191 DB_XREF=PID:g1786389 SEG=NC_000913:+214833,215255 LEN=422 DEF=orf, hypothetical protein
1767738_s_at	397.7	P	0.000244	521.9	P	0.000244	511.6	P	0.000244	296.5	P	0.000244	419.7	P	0.000244	423.3	P	0.000244	MG1655_cutF_b0192 DB_XREF=PID:g1786390 SEG=NC_000913:+215269,215979 LEN=710 DEF=copper homeostasis protein (lipoprotein)
1761583_s_at	113.9	P	0.000244	105.5	P	0.001953	94.6	P	0.00415	107.9	P	0.000732	92.6	P	0.000732	66	P	0.008057	MG1655_yaeF_b0193 DB_XREF=PID:g1786391 SEG=NC_000913:-216179,217057 LEN=878 DEF=orf, hypothetical protein
1760510_s_at	937.8	P	0.000244	908.4	P	0.000244	876.5	P	0.000244	771.7	P	0.000732	588	P	0.000732	671.6	P	0.000732	MG1655_proS_b0194 DB_XREF=PID:g1786392 SEG=NC_000913:-217057,218775 LEN=1718 DEF=proline tRNA synthetase
1763233_s_at	531.7	P	0.000244	322.8	P	0.000732	312.4	P	0.000732	211.3	P	0.000732	175.3	P	0.001953	147.2	P	0.00293	MG1655_yaeB_b0195 DB_XREF=PID:g1786393 SEG=NC_000913:-218887,219594 LEN=707 DEF=orf, hypothetical protein
1762300_s_at	1135.6	P	0.000244	1197.1	P	0.000244	1225	P	0.000244	877.5	P	0.000244	972.9	P	0.000244	933.6	P	0.000244	MG1655_rcsF_b0196 DB_XREF=PID:g1786394 SEG=NC_000913:-219591,219995 LEN=404 DEF=regulator in colanic acid synthesis; interacts with RcsB
1768151_s_at	702.7	P	0.000244	1216.8	P	0.000244	1031.2	P	0.000244	2476.3	P	0.000244	3892.3	P	0.000244	4474.7	P	0.000244	MG1655_metQ_b0197 DB_XREF=PID:g1786396 SEG=NC_000913:-220113,220928 LEN=815 DEF=D-methionine transport protein (ABC superfamily, peri_bind)
1768704_s_at	370.1	P	0.000244	329.6	P	0.000244	304	P	0.000244	562.1	P	0.000244	688.4	P	0.000244	746.4	P	0.000244	MG1655_metI_b0198 DB_XREF=PID:g1786397 SEG=NC_000913:-220968,221621 LEN=653 DEF=D- and L-methionine transport protein (ABC superfamily, membrane)
1768746_s_at	208.6	P	0.000732	119.6	P	0.000732	137.6	P	0.00293	193.8	P	0.001221	139.8	P	0.001953	89.7	P	0.005859	MG1655_metN_b0199 DB_XREF=PID:g1786398 SEG=NC_000913:-221614,222645 LEN=1031 DEF=D- and L-methionine transport protein (ABC superfamily, atp_bind)
1761790_s_at	1242.7	P	0.000244	2111.8	P	0.000244	1711	P	0.000244	1010.4	P	0.000244	1259.3	P	0.000244	1245.5	P	0.000244	MG1655_gmhB_b0200 DB_XREF=PID:g1786399 SEG=NC_000913:+222833,223408 LEN=575 DEF=D,D-heptose 1,7-bisphosphate phosphatase
1763456_s_at	8090.5	P	0.000244	13803	P	0.000244	11657.7	P	0.000244	10985.3	P	0.000244	13116.1	P	0.000244	14538.2	P	0.000244	MG1655_rrsH_b0201 SEG=NC_000913:+223771,225312 LEN=1541 DEF=16S rRNA
1760713_s_at	6793.9	P	0.000244	11920.9	P	0.000244	7884.9	P	0.000244	7779.4	P	0.000244	8753.2	P	0.000244	11452.4	P	0.000244	EDL933_rrlG_Z3875 SEG=NC_002655:-3516316,3519223 LEN=2907 DEF=23S ribosomal RNA
1763891_s_at	6521.3	P	0.000244	11280.4	P	0.000244	7761.5	P	0.000244	7979.8	P	0.000244	9382.1	P	0.000244	11823.3	P	0.000244	MG1655_rrfH_b0205 SEG=NC_000913:+228756,228875 LEN=119 DEF=5S rRNA
1763661_s_at	343	P	0.000244	382.6	P	0.000244	376.9	P	0.000244	361.8	P	0.000244	390.4	P	0.000244	325.4	P	0.000244	MG1655_b0207 DB_XREF=PID:g1786400 SEG=NC_000913:+229167,229970 LEN=803 DEF=2,5-diketo-D-gluconate reductase B
1765529_s_at	178.1	P	0.000244	184	P	0.000244	193.7	P	0.000244	219.4	P	0.001221	210.5	P	0.001953	207.6	P	0.001953	MG1655_yafC_b0208 DB_XREF=PID:g1786401 SEG=NC_000913:-229967,230881 LEN=914 DEF=putative transcriptional regulator LYSR-type
1767267_s_at	1018.6	P	0.000244	370	P	0.000244	358.7	P	0.000244	850.2	P	0.000244	583.3	P	0.000244	526.6	P	0.000244	MG1655_yafD_b0209 DB_XREF=PID:g1786403 SEG=NC_000913:+231122,231922 LEN=800 DEF=orf, hypothetical protein
1767322_s_at	623.2	P	0.000244	191.9	P	0.000732	256.1	P	0.000244	352	P	0.000244	353.4	P	0.001953	416.1	P	0.00293	MG1655_yafE_b0210 DB_XREF=PID:g1786404 SEG=NC_000913:+231926,232549 LEN=623 DEF=putative biotin synthesis protein
1766197_s_at	5779.3	P	0.000244	3870.8	P	0.000244	3193.3	P	0.000244	4487.7	P	0.000244	5673.2	P	0.000244	6547.4	P	0.000244	MG1655_b0211 DB_XREF=PID:g1786405 SEG=NC_000913:-232597,233955 LEN=1358 DEF=cytochrome c552
1766478_s_at	293.9	P	0.000244	309.3	P	0.000244	395.4	P	0.000244	545.1	P	0.000244	541.7	P	0.000244	534.4	P	0.000244	MG1655_gloB_b0212 DB_XREF=PID:g1786406 SEG=NC_000913:-234027,234782 LEN=755 DEF=probable hydroxyacylglutathione hydrolase
1764076_s_at	332.2	P	0.000244	467.7	P	0.000244	395.5	P	0.000244	228.3	P	0.000244	474.2	P	0.000244	367	P	0.000244	MG1655_yafS_b0213 DB_XREF=PID:g1786407 SEG=NC_000913:+234798,235538 LEN=740 DEF=orf, hypothetical protein
1764593_s_at	871	P	0.000244	1253.3	P	0.000244	1221.6	P	0.000244	683.2	P	0.000244	831.7	P	0.000244	746.9	P	0.000244	MG1655_rnhA_b0214 DB_XREF=PID:g1786408 SEG=NC_000913:-235535,236002 LEN=467 DEF=RNase HI, degrades RNA of DNA-RNA hybrids, participates in DNA replication
1763265_s_at	610.8	P	0.000244	386.1	P	0.000732	474	P	0.000732	522.1	P	0.000732	479.7	P	0.00415	388.6	P	0.008057	MG1655_dnaQ_b0215 DB_XREF=PID:g1786409 SEG=NC_000913:+236067,236798 LEN=731 DEF=DNA polymerase III, epsilon subunit
1769170_at	97.4	P	0.000244	192.2	P	0.000244	214	P	0.000244	116.9	P	0.000244	149.2	P	0.000244	144.2	P	0.000244	MG1655_yafT_b0217 DB_XREF=PID:g1786410 SEG=NC_000913:+237335,238120 LEN=785 DEF=putative aminopeptidase
1766207_at	51.6	P	0.000244	79.5	P	0.000732	127.1	P	0.000732	226.3	P	0.000244	148	P	0.000244	83.8	P	0.000244	MG1655_yafU_b0218 DB_XREF=PID:g1786411 SEG=NC_000913:-238746,239084 LEN=338 DEF=orf, hypothetical protein
1763717_s_at	139.8	P	0.00415	38.4	P	0.037598	118.3	A	0.080566	104.8	A	0.246094	59.1	A	0.334473	80.8	A	0.334473	MG1655_yafV_b0219 DB_XREF=PID:g1786412 SEG=NC_000913:-239419,240189 LEN=770 DEF=putative EC 3.5. amidase-type enzyme
1768146_s_at	263.3	P	0.001953	1059	P	0.000244	1217.5	P	0.000244	342.7	P	0.001953	755.5	P	0.001953	580.9	P	0.001221	MG1655_ykfE_b0220 DB_XREF=PID:g1786413 SEG=NC_000913:+240343,240816 LEN=473 DEF=orf, hypothetical protein
1761891_at	123.9	P	0.005859	103	P	0.010742	91.2	P	0.018555	243.6	P	0.000732	198	P	0.000732	227	P	0.001221	MG1655_b0221 DB_XREF=PID:g1786414 SEG=NC_000913:-240859,243339 LEN=2480 DEF=putative acyl-CoA dehydrogenase
1766153_s_at	724.2	P	0.000244	895.7	P	0.000244	868	P	0.000244	914.4	P	0.000244	826.6	P	0.000244	764.4	P	0.000244	MG1655_b0222 DB_XREF=PID:g1786416 SEG=NC_000913:+243543,244121 LEN=578 DEF=phosphoheptose isomerase
1763585_s_at	630.3	P	0.000244	444.8	P	0.000244	390.2	P	0.000244	381.6	P	0.000244	346.9	P	0.000244	290.9	P	0.001221	EDL933_yafJ_Z0281 DB_XREF=GI:12512994 SEG=NC_002655:+282295,283062 LEN=767 DEF=putative amidotransferase
1763019_s_at	3259.9	P	0.000244	1270.9	P	0.000244	1382.2	P	0.000244	2080.9	P	0.000244	1315.1	P	0.000244	1445	P	0.000244	MG1655_yafK_b0224 DB_XREF=PID:g1786418 SEG=NC_000913:-245065,245805 LEN=740 DEF=orf, hypothetical protein
1766667_s_at	1629.1	P	0.000244	994	P	0.000244	1136.4	P	0.000244	909.6	P	0.000244	822.9	P	0.000244	648.6	P	0.000244	MG1655_yafQ_b0225 DB_XREF=PID:g1786419 SEG=NC_000913:-245961,246239 LEN=278 DEF=orf, hypothetical protein
1766138_s_at	2206.2	P	0.000244	1533.2	P	0.000244	1192.4	P	0.000244	2249.2	P	0.000244	1900.4	P	0.000244	1931.3	P	0.000244	MG1655_dinJ_b0226 DB_XREF=PID:g1786420 SEG=NC_000913:-246242,246502 LEN=260 DEF=damage-inducible protein J
1759233_at	53	P	0.010742	45.7	P	0.037598	63.1	P	0.023926	80.9	P	0.030273	51.7	A	0.129639	40.5	A	0.219482	MG1655_yafL_b0227 DB_XREF=PID:g1786421 SEG=NC_000913:+246712,247461 LEN=749 DEF=putative lipoprotein
1761972_at	64.8	P	0.001953	81	P	0.001953	163.1	P	0.001953	176.3	P	0.001221	151.5	P	0.001221	175.9	P	0.001953	MG1655_yafM_b0228 DB_XREF=PID:g1786422 SEG=NC_000913:+247637,248134 LEN=497 DEF=orf, hypothetical protein
1762782_at	2.8	A	0.601074	8.2	A	0.398926	25.1	A	0.171387	37.9	A	0.149658	40.5	A	0.246094	4.5	A	0.432373	MG1655_fhiA_b0229 DB_XREF=PID:g1786423 SEG=NC_000913:-248358,250097 LEN=1739 DEF=flagellar biosynthesis
1768262_s_at	40.8	A	0.095215	8.6	A	0.149658	57.8	M	0.056152	91.1	A	0.067627	67.8	A	0.149658	74.8	A	0.149658	MG1655_mbhA_b0230 DB_XREF=PID:g1786424 SEG=NC_000913:+250042,250827 LEN=785 DEF=putative motility protein
1761815_s_at	165.2	P	0.001221	146.3	P	0.005859	148.4	P	0.010742	148.2	P	0.005859	123.2	P	0.00415	130.7	P	0.01416	MG1655_dinB_b0231 DB_XREF=PID:g1786425 SEG=NC_000913:+250898,251953 LEN=1055 DEF=DNA polymerase IV -!- DNA polymerase IV, devoid of proofreading, damage-inducible protein P
1765636_s_at	214	P	0.000244	346.7	P	0.000244	393.2	P	0.000244	234	P	0.000244	140.1	P	0.000244	135.8	P	0.000244	MG1655_yafN_b0232 DB_XREF=PID:g1786426 SEG=NC_000913:+252005,252298 LEN=293 DEF=orf, hypothetical protein
1760790_s_at	135.5	P	0.000244	155.6	P	0.000244	182.1	P	0.000244	117.7	P	0.000244	79.3	P	0.000244	49.4	P	0.000732	MG1655_yafO_b0233 DB_XREF=PID:g1786427 SEG=NC_000913:+252301,252699 LEN=398 DEF=orf, hypothetical protein
1768128_s_at	91.9	M	0.056152	104	A	0.095215	142.9	M	0.056152	116	P	0.030273	77.2	M	0.056152	55.6	A	0.095215	MG1655_yafP_b0234 DB_XREF=PID:g1786428 SEG=NC_000913:+252709,253161 LEN=452 DEF=orf, hypothetical protein
1767564_s_at	25.2	P	0.000244	30.6	P	0.005859	41.8	P	0.000244	60	P	0.000244	48.9	P	0.000244	40.9	P	0.000732	MG1655_b0235 DB_XREF=PID:g1786430 SEG=NC_000913:+253467,253733 LEN=266 DEF=orf, hypothetical protein
1769278_s_at	48.2	P	0.010742	38.4	P	0.010742	49.3	P	0.023926	49.4	P	0.008057	42.6	P	0.023926	58.7	P	0.030273	MG1655_prfH_b0236 DB_XREF=PID:g1786431 SEG=NC_000913:+253702,254202 LEN=500 DEF=probable peptide chain release factor
1765191_s_at	2026.2	P	0.000244	2900.7	P	0.000244	2832.4	P	0.000244	1991.3	P	0.000244	2830.7	P	0.000244	3022.5	P	0.000244	MG1655_pepD_b0237 DB_XREF=PID:g1786432 SEG=NC_000913:-254259,255716 LEN=1457 DEF=aminoacyl-histidine dipeptidase (peptidase D)
1767179_s_at	1221.8	P	0.000244	652.8	P	0.000244	707.8	P	0.000244	1026.2	P	0.000244	917.9	P	0.000244	1177.7	P	0.000244	MG1655_gpt_b0238 DB_XREF=PID:g1786433 SEG=NC_000913:+255977,256435 LEN=458 DEF=guanine-hypoxanthine phosphoribosyltransferase
1759609_s_at	578.2	P	0.000244	662.3	P	0.000244	634.2	P	0.000244	384.8	P	0.000244	373.3	P	0.000244	366.6	P	0.000244	MG1655_yafA_b0239 DB_XREF=PID:g1786434 SEG=NC_000913:+256527,257771 LEN=1244 DEF=orf, hypothetical protein
1763829_s_at	1879.3	P	0.000244	3737	P	0.000244	3939.9	P	0.000244	2948.3	P	0.000244	3314.9	P	0.000244	3566.7	P	0.000244	MG1655_crl_b0240 DB_XREF=PID:g1786435 SEG=NC_000913:+257829,258230 LEN=401 DEF=transcriptional regulator of cryptic csgA gene for curli surface fibers
1764534_s_at	1407.1	P	0.000244	122.9	P	0.000244	145.3	P	0.000244	83.5	P	0.000244	79.5	P	0.000244	88	P	0.00293	MG1655_phoE_b0241 DB_XREF=PID:g1786436 SEG=NC_000913:-258269,259324 LEN=1055 DEF=outer membrane pore protein E (E,Ic,NmpAB)
1765855_s_at	657.8	P	0.000244	314	P	0.000244	248.4	P	0.000244	356.5	P	0.000244	347.6	P	0.000244	347.4	P	0.000244	MG1655_proB_b0242 DB_XREF=PID:g1786437 SEG=NC_000913:+259612,260715 LEN=1103 DEF=gamma-glutamate kinase
1761322_s_at	668	P	0.000244	386.9	P	0.000244	465.5	P	0.000732	458.7	P	0.000244	470.6	P	0.000244	488.1	P	0.000244	MG1655_proA_b0243 DB_XREF=PID:g1786438 SEG=NC_000913:+260727,261980 LEN=1253 DEF=gamma-glutamylphosphate reductase
1765462_at	27.7	A	0.334473	32.1	A	0.171387	36.3	A	0.171387	37.6	A	0.080566	46.9	A	0.219482	34.3	A	0.27417	MG1655_b0245 DB_XREF=PID:g1786439 SEG=NC_000913:-262552,262893 LEN=341 DEF=orf, hypothetical protein
1766692_at	99.7	P	0.000732	79.4	P	0.008057	107.2	P	0.00415	102.2	P	0.000244	70.9	P	0.001953	73.6	P	0.01416	MG1655_yafW_b0246 DB_XREF=PID:g1786440 SEG=NC_000913:-262914,263231 LEN=317 DEF=orf, hypothetical protein
1767381_at	52.8	P	0.000244	35.5	P	0.00415	76	P	0.000244	77.7	P	0.000244	71.7	P	0.000732	26.5	P	0.001953	MG1655_ykfG_b0247 DB_XREF=PID:g2367100 SEG=NC_000913:-263480,263956 LEN=476 DEF=putative DNA repair protein
1764951_at	140.8	P	0.000244	81.4	P	0.00293	108.6	P	0.000732	120	P	0.000732	87.4	P	0.00415	91.3	P	0.008057	MG1655_yafX_b0248 DB_XREF=PID:g1786442 SEG=NC_000913:-263972,264430 LEN=458 DEF=orf, hypothetical protein
1759269_at	70.4	P	0.01416	72.1	P	0.00415	95.2	P	0.018555	80.8	A	0.149658	76	A	0.149658	65.6	A	0.149658	MG1655_ykfF_b0249 DB_XREF=PID:g1786443 SEG=NC_000913:-264528,264767 LEN=239 DEF=orf, hypothetical protein
1765955_at	180.8	P	0.000244	492.1	P	0.001953	575.4	P	0.001953	399.1	P	0.001953	1786.4	P	0.000732	1926	P	0.000732	MG1655_ykfB_b0250 DB_XREF=PID:g1786444 SEG=NC_000913:-264844,265311 LEN=467 DEF=orf, hypothetical protein
1759604_at	42.2	P	0.010742	72.2	P	0.000244	109.3	P	0.001953	112.9	P	0.008057	84.9	P	0.000244	89.4	P	0.000244	MG1655_yafY_b0251 DB_XREF=PID:g1786445 SEG=NC_000913:-265334,266191 LEN=857 DEF=hypothetical transcriptional regulator
1762538_at	51.5	P	0.000244	50	P	0.000244	80.3	P	0.000244	107.2	P	0.000244	65.3	P	0.000244	47.1	P	0.000244	MG1655_yafZ_b0252 DB_XREF=PID:g1786446 SEG=NC_000913:-266408,267244 LEN=836 DEF=orf, hypothetical protein
1763005_at	191.5	P	0.000244	108.5	P	0.000732	106.3	P	0.000244	231.3	P	0.000244	130.7	P	0.000732	131.7	P	0.000244	MG1655_ykfA_b0253 DB_XREF=PID:g1786447 SEG=NC_000913:-267321,268187 LEN=866 DEF=putative GTP-binding protein
1764427_at	77.5	P	0.000732	89.8	P	0.000732	117.1	P	0.000732	153.5	P	0.000732	112.3	P	0.000732	112.9	P	0.000244	MG1655_perR_b0254 DB_XREF=PID:g1786448 SEG=NC_000913:-268513,269406 LEN=893 DEF=peroxide resistance protein
1760445_at	136.8	P	0.000244	156.6	P	0.000244	217.2	P	0.001953	167.5	P	0.001953	199.6	P	0.00415	139.9	P	0.000244	MG1655_yi91a_b0255 DB_XREF=PID:g1786449 SEG=NC_000913:+269466,269870 LEN=404 DEF=hypothetical protein
1763083_s_at	185.5	P	0.000244	180.3	P	0.000244	226.1	P	0.000732	210.5	P	0.000244	227.4	P	0.000732	207.1	P	0.000244	EDL933_Z1133 DB_XREF=GI:12513932 SEG=NC_002655:-1072481,1072792 LEN=311 DEF=partial putative transposase
1759750_at	348.8	P	0.000244	150.3	P	0.01416	176.1	P	0.01416	205.1	P	0.00415	230.8	P	0.008057	171.1	P	0.010742	MG1655_b0257 DB_XREF=PID:g1786451 SEG=NC_000913:+271054,271479 LEN=425 DEF=putative transposase
1762431_at	120.2	P	0.000244	94.9	P	0.001953	104.6	P	0.000732	118.4	P	0.000244	136.7	P	0.000732	91.8	P	0.001221	MG1655_ykfC_b0258 DB_XREF=PID:g1786452 SEG=NC_000913:+272086,273216 LEN=1130 DEF=orf, hypothetical protein
1765954_s_at	2787.9	P	0.000244	3427.4	P	0.000244	3925.5	P	0.000244	3523.5	P	0.000244	4308.4	P	0.000244	3589.4	P	0.000244	MG1655_trs5_1_b0259 DB_XREF=PID:g1786453 SEG=NC_000913:-273325,274341 LEN=1016 DEF=IS5 transposase
1767548_at	30.9	A	0.111572	39	M	0.056152	47.9	A	0.19458	73.3	P	0.037598	31.9	A	0.149658	51.2	M	0.056152	MG1655_b0260 DB_XREF=PID:g1786455 SEG=NC_000913:+274525,275952 LEN=1427 DEF=putative amino acidamine transport protein
1762842_at	160.3	P	0.000244	151.1	P	0.000244	164.4	P	0.000244	334.3	P	0.000244	320.5	P	0.000244	275.8	P	0.000244	MG1655_b0261 DB_XREF=PID:g1786456 SEG=NC_000913:+275939,276871 LEN=932 DEF=YagD
1759356_at	108.6	P	0.023926	81.3	P	0.023926	88.3	P	0.023926	141.7	P	0.018555	88.4	P	0.030273	75.6	P	0.030273	MG1655_afuC_b0262 DB_XREF=PID:g1786457 SEG=NC_000913:-276980,278038 LEN=1058 DEF=putative ATP-binding component of a transport system
1762391_at	62.9	P	0.000244	14.9	A	0.171387	36.7	P	0.008057	57	P	0.000732	35.8	P	0.018555	34	P	0.037598	MG1655_b0263 DB_XREF=PID:g1786458 SEG=NC_000913:-278038,278400 LEN=362 DEF=putative transport system permease protein
1761083_at	325.1	P	0.001221	242.1	P	0.00415	220.9	P	0.00293	248	P	0.00293	200.9	P	0.00415	195.9	P	0.00415	MG1655_yagB_b0266 DB_XREF=PID:g1786461 SEG=NC_000913:-279609,279986 LEN=377 DEF=orf, hypothetical protein
1760927_at	37	A	0.080566	70.5	P	0.030273	116.4	M	0.056152	147.2	P	0.030273	126.7	M	0.056152	72.7	A	0.067627	MG1655_yagA_b0267 DB_XREF=PID:g1786462 SEG=NC_000913:-280053,281207 LEN=1154 DEF=orf, hypothetical protein
1768438_at	12.4	A	0.334473	77.1	P	0.01416	54.1	P	0.00415	84.2	P	0.00293	90.2	P	0.008057	67.8	P	0.01416	MG1655_yagE_b0268 DB_XREF=PID:g1786463 SEG=NC_000913:+281481,282410 LEN=929 DEF=putative lyasesynthase
1766321_at	59.5	P	0.010742	89.8	P	0.018555	109.9	P	0.008057	159	P	0.00415	118.2	P	0.008057	113.6	P	0.00415	MG1655_yagF_b0269 DB_XREF=PID:g1786464 SEG=NC_000913:+282425,284392 LEN=1967 DEF=putative dehydratase
1767774_at	16.6	A	0.398926	30.2	A	0.246094	39	M	0.056152	58.6	M	0.056152	37	A	0.111572	9.9	A	0.533936	MG1655_yagG_b0270 DB_XREF=PID:g1786466 SEG=NC_000913:+284619,286001 LEN=1382 DEF=putative permease
1759266_at	29.8	P	0.01416	56	P	0.000244	100.3	P	0.000732	111.9	P	0.000244	107.1	P	0.000244	90.4	P	0.001221	MG1655_yagH_b0271 DB_XREF=PID:g1786467 SEG=NC_000913:+286013,287623 LEN=1610 DEF=putative beta-xylosidase (EC 3.2.1.37)
1760144_at	310	P	0.000244	187.2	P	0.000732	220	P	0.000244	226.5	P	0.000732	303.7	P	0.000732	294	P	0.000244	MG1655_yagI_b0272 DB_XREF=PID:g1786468 SEG=NC_000913:-287628,288386 LEN=758 DEF=putative regulator
1765382_at	1026.3	P	0.000244	114.1	P	0.023926	134.1	P	0.001953	186.8	P	0.008057	228.1	P	0.001221	185.6	P	0.001221	MG1655_argF_b0273 DB_XREF=PID:g1786469 SEG=NC_000913:-288525,289529 LEN=1004 DEF=ornithine carbamoyltransferase 2, chain F
1762384_at	214.5	P	0.000244	236.4	P	0.000732	254.9	P	0.001953	244.3	P	0.000732	212.2	P	0.008057	181.2	P	0.008057	MG1655_yagJ_b0276 DB_XREF=PID:g1786472 SEG=NC_000913:+290724,291455 LEN=731 DEF=orf, hypothetical protein
1766950_at	79.3	P	0.000244	83.9	P	0.000244	94.1	P	0.000244	93.8	P	0.000244	76.4	P	0.000244	82	P	0.000244	MG1655_yagK_b0277 DB_XREF=PID:g1786473 SEG=NC_000913:-291546,292172 LEN=626 DEF=orf, hypothetical protein
1766508_at	81.9	P	0.008057	105	P	0.001221	127.2	P	0.005859	135.3	P	0.001221	108	P	0.005859	93.9	P	0.018555	MG1655_yagL_b0278 DB_XREF=PID:g1786474 SEG=NC_000913:-292444,293142 LEN=698 DEF=DNA-binding protein
1761256_at	41.5	P	0.000244	51.8	P	0.001953	58	P	0.000244	73.8	P	0.000244	47.4	P	0.000244	50.5	P	0.000732	MG1655_yagM_b0279 DB_XREF=PID:g2367101 SEG=NC_000913:-293169,294023 LEN=854 DEF=orf, hypothetical protein
1766730_at	1569	P	0.000244	1481.3	P	0.000244	1680.1	P	0.000244	1963	P	0.000244	1487	P	0.000244	1150.5	P	0.000244	MG1655_yagN_b0280 DB_XREF=PID:g2367102 SEG=NC_000913:-294363,294803 LEN=440 DEF=orf, hypothetical protein
1760660_at	265.3	P	0.000244	195.5	P	0.000244	246	P	0.000244	229.2	P	0.000244	229.9	P	0.000244	233.8	P	0.000244	MG1655_intF_b0281 DB_XREF=PID:g2367104 SEG=NC_000913:-294920,296320 LEN=1400 DEF=putative phage integrase
1761572_s_at	53.1	P	0.000244	53.7	P	0.000244	96.1	P	0.000244	90	P	0.000244	83.4	P	0.000244	60.2	P	0.000244	MG1655_yagP_b0282 DB_XREF=PID:g1786476 SEG=NC_000913:-296605,297015 LEN=410 DEF=putative transcriptional regulator LYSR-type
1768564_s_at	34.8	P	0.023926	54.8	P	0.018555	55.3	P	0.010742	87.8	P	0.01416	68.5	P	0.023926	50.5	A	0.111572	MG1655_yagQ_b0283 DB_XREF=PID:g1786477 SEG=NC_000913:-296994,297950 LEN=956 DEF=orf, hypothetical protein
1761860_s_at	36.5	P	0.037598	47.6	A	0.095215	75.3	P	0.005859	87.5	P	0.001221	69.3	P	0.01416	46.8	P	0.046143	MG1655_yagR_b0284 DB_XREF=PID:g1786478 SEG=NC_000913:-297960,300158 LEN=2198 DEF=orf, hypothetical protein
1761739_s_at	12.3	P	0.008057	27.2	P	0.001953	30.3	P	0.001221	36.1	P	0.000244	27.2	P	0.000244	25.9	P	0.01416	MG1655_yagS_b0285 DB_XREF=PID:g1786479 SEG=NC_000913:-300155,301111 LEN=956 DEF=orf, hypothetical protein
1766465_s_at	50.4	P	0.000244	58.1	P	0.000244	91.3	P	0.000732	109.3	P	0.000244	103.1	P	0.000732	58.7	P	0.005859	MG1655_yagT_b0286 DB_XREF=PID:g1786480 SEG=NC_000913:-301108,301797 LEN=689 DEF=putative xanthine dehydrogenase (EC 1.1.1.20)
1766131_s_at	158.2	P	0.000732	468.3	P	0.000244	817.9	P	0.000244	332.3	P	0.000244	282.7	P	0.001221	286.3	P	0.001221	MG1655_yagU_b0287 DB_XREF=PID:g1786481 SEG=NC_000913:+302215,302829 LEN=614 DEF=orf, hypothetical protein
1768339_s_at	94.5	P	0.000732	126	P	0.001221	207.5	P	0.000732	184.6	P	0.000732	146.8	P	0.001221	129.6	P	0.00415	MG1655_ykgJ_b0288 DB_XREF=PID:g2367105 SEG=NC_000913:-303077,303406 LEN=329 DEF=putative ferredoxin
1761475_s_at	74.9	P	0.000732	66.5	P	0.00293	110.1	P	0.010742	66.6	P	0.005859	72.9	P	0.00415	48.9	P	0.00293	MG1655_yagV_b0289 DB_XREF=PID:g1786482 SEG=NC_000913:-303719,304474 LEN=755 DEF=orf, hypothetical protein
1764024_s_at	110	P	0.008057	111	P	0.023926	119.8	P	0.030273	121.7	P	0.005859	108.2	P	0.023926	96.7	P	0.023926	MG1655_yagW_b0290 DB_XREF=PID:g1786483 SEG=NC_000913:-304398,306041 LEN=1643 DEF=putative receptor
1765946_s_at	2.2	A	0.753906	23.5	P	0.010742	23.2	A	0.111572	27.8	A	0.111572	9.2	A	0.432373	6	A	0.398926	MG1655_yagX_b0291 DB_XREF=PID:g1786484 SEG=NC_000913:-306031,308556 LEN=2525 DEF=putative enzyme
1765129_s_at	14.3	A	0.067627	33.8	P	0.023926	74.6	P	0.005859	78	P	0.00415	43.3	P	0.018555	33.2	P	0.018555	MG1655_yagY_b0292 DB_XREF=PID:g1786485 SEG=NC_000913:-308582,309250 LEN=668 DEF=orf, hypothetical protein
1762173_s_at	24.3	A	0.111572	67.8	P	0.046143	51.8	P	0.030273	93	P	0.030273	112.2	P	0.046143	114.4	P	0.046143	MG1655_yagZ_b0293 DB_XREF=PID:g1786486 SEG=NC_000913:-309308,309895 LEN=587 DEF=orf, hypothetical protein
1759211_s_at	8.3	A	0.080566	36.6	P	0.005859	36.7	P	0.023926	60.2	P	0.00293	52.2	P	0.010742	38.5	P	0.010742	MG1655_ykgK_b0294 DB_XREF=PID:g2367106 SEG=NC_000913:-309970,310560 LEN=590 DEF=putative regulator
1761582_s_at	392.7	P	0.000244	404.1	P	0.000244	818.8	P	0.000244	396	P	0.000244	333.9	P	0.000244	339.6	P	0.000244	MG1655_ykgL_b0295 DB_XREF=PID:g2367107 SEG=NC_000913:+311336,311563 LEN=227 DEF=orf, hypothetical protein
1763015_s_at	66.5	P	0.000244	213.5	P	0.000244	250.2	P	0.000244	139.1	P	0.000244	115.4	P	0.000244	89.4	P	0.000244	MG1655_ykgM_b0296 DB_XREF=PID:g2367109 SEG=NC_000913:-311738,312001 LEN=263 DEF=putative ribosomal protein
1760011_s_at	19	A	0.129639	25.6	P	0.00293	32	P	0.010742	51.8	P	0.001221	43.5	P	0.008057	23.9	P	0.000732	MG1655_eaeH_b0297 DB_XREF=PID:g1786488 SEG=NC_000913:+313581,314468 LEN=887 DEF=attaching and effacing protein, pathogenesis factor
1766923_s_at	1164.5	P	0.000244	754.4	P	0.000732	750.5	P	0.000244	672.4	P	0.001221	772	P	0.000732	673.1	P	0.000732	MG1655_b0298 DB_XREF=PID:g1786489 SEG=NC_000913:+314506,314814 LEN=308 DEF=hypothetical protein
1764530_s_at	306.4	P	0.023926	232.4	P	0.030273	258.5	P	0.037598	275.5	P	0.030273	263.5	P	0.030273	218.5	P	0.037598	MG1655_tra5_5_b0299 DB_XREF=PID:g1786490 SEG=NC_000913:+314811,315677 LEN=866 DEF=IS3 putative transposase
1766002_at	0.3	A	0.953857	9.9	A	0.171387	1.9	A	0.567627	1.3	A	0.780518	4.5	A	0.533936	0.8	A	0.845215	MG1655_ykgA_b0300 DB_XREF=PID:g1786491 SEG=NC_000913:-315674,316393 LEN=719 DEF=putative ARAC-type regulatory protein
1761401_s_at	0.7	A	0.366211	3	A	0.398926	0.9	A	0.633789	5.7	A	0.219482	7.4	A	0.366211	8	A	0.334473	MG1655_ykgB_b0301 DB_XREF=PID:g1786492 SEG=NC_000913:-316950,317552 LEN=602 DEF=orf, hypothetical protein
1764862_s_at	1.6	A	0.171387	0.1	A	0.601074	2.3	A	0.633789	3.3	A	0.165527	2.9	A	0.171387	5.1	A	0.26709	MG1655_ykgI_b0303 DB_XREF=PID:g1786494 SEG=NC_000913:-317555,317806 LEN=251 DEF=orf, hypothetical protein
1760183_s_at	8.9	A	0.171387	6.3	A	0.334473	8.2	A	0.334473	9.2	A	0.27417	4.5	A	0.303711	11.5	A	0.19458	MG1655_ykgC_b0304 DB_XREF=PID:g1786495 SEG=NC_000913:-317900,319252 LEN=1352 DEF=putative oxidoreductase
1761823_s_at	4.7	A	0.567627	16.6	A	0.303711	13.3	A	0.303711	14.9	A	0.213379	5.5	A	0.398926	8.3	A	0.5	MG1655_ykgD_b0305 DB_XREF=PID:g1786496 SEG=NC_000913:+319451,320305 LEN=854 DEF=putative ARAC-type regulatory protein
1766629_s_at	63.2	A	0.129639	46.4	A	0.149658	66.8	A	0.080566	96.7	A	0.219482	59.2	A	0.067627	61.8	A	0.171387	MG1655_ykgE_b0306 DB_XREF=PID:g1786497 SEG=NC_000913:+320832,321551 LEN=719 DEF=putative dehydrogenase subunit
1762567_s_at	1.3	A	0.633789	1.9	A	0.665527	2.7	A	0.567627	6.1	A	0.466064	2	A	0.696289	2.1	A	0.533936	MG1655_ykgF_b0307 DB_XREF=PID:g1786498 SEG=NC_000913:+321562,322989 LEN=1427 DEF=orf, hypothetical protein
1766376_s_at	24	M	0.056152	29.7	A	0.095215	29.4	A	0.095215	30.4	A	0.111572	30	M	0.056152	39	A	0.219482	MG1655_ykgG_b0308 DB_XREF=PID:g1786499 SEG=NC_000913:+322829,323677 LEN=848 DEF=putative transporter
1767163_s_at	0.9	A	0.273926	0.2	A	0.567627	0.2	A	0.72583	2.8	A	0.129639	0.2	A	0.366211	4.4	A	0.067627	MG1655_b0309 DB_XREF=PID:g1786500 SEG=NC_000913:-323632,323844 LEN=212 DEF=orf, hypothetical protein
1765300_s_at	1.8	A	0.533936	1	A	0.601074	3.9	A	0.303711	6.2	A	0.219482	2.9	A	0.533936	0.3	A	0.753906	MG1655_ykgH_b0310 DB_XREF=PID:g1786502 SEG=NC_000913:-323920,324588 LEN=668 DEF=orf, hypothetical protein
1762136_at	19.1	A	0.246094	34.9	A	0.149658	19.8	A	0.149658	31.3	A	0.171387	33.7	A	0.219482	28.2	A	0.27417	MG1655_betA_b0311 DB_XREF=PID:g1786503 SEG=NC_000913:-324801,326471 LEN=1670 DEF=choline dehydrogenase, a flavoprotein
1763342_at	1	A	0.80542	1.3	A	0.780518	0.9	A	0.828613	2.1	A	0.633789	2.2	A	0.633789	2.2	A	0.850342	MG1655_betB_b0312 DB_XREF=PID:g1786504 SEG=NC_000913:-326485,327957 LEN=1472 DEF=NAD+-dependent betaine aldehyde dehydrogenase
1763770_s_at	5.1	P	0.018555	11.9	A	0.095215	15.9	P	0.010742	4.8	A	0.19458	16.8	A	0.095215	19.6	P	0.030273	MG1655_betI_b0313 DB_XREF=PID:g1786505 SEG=NC_000913:-327971,328558 LEN=587 DEF=probably transcriptional repressor of bet genes
1763187_s_at	2.9	A	0.850342	1.7	A	0.696289	6.6	A	0.601074	1.3	A	0.80542	9.8	A	0.533936	2.7	A	0.72583	MG1655_betT_b0314 DB_XREF=PID:g1786506 SEG=NC_000913:+328687,330720 LEN=2033 DEF=high-affinity choline transport
1768882_s_at	1.3	A	0.432373	0.4	A	0.850342	0.4	A	0.658447	2.6	A	0.366211	0.5	A	0.753906	0.7	A	0.828613	MG1655_yahA_b0315 DB_XREF=PID:g1786507 SEG=NC_000913:+331595,332683 LEN=1088 DEF=orf, hypothetical protein
1764504_s_at	0.2	A	0.870361	2	A	0.533936	0.5	A	0.888428	0.8	A	0.696289	3.3	A	0.432373	3.6	A	0.567627	MG1655_yahB_b0316 DB_XREF=PID:g1786508 SEG=NC_000913:-332725,333657 LEN=932 DEF=putative transcriptional regulator LYSR-type
1762521_s_at	0.5	A	0.870361	0.5	A	0.799316	1.8	A	0.780518	1.3	A	0.753906	1	A	0.696289	2.3	A	0.633789	MG1655_yahC_b0317 DB_XREF=PID:g1786509 SEG=NC_000913:-333749,334246 LEN=497 DEF=orf, hypothetical protein
1764944_s_at	1.1	A	0.601074	1	A	0.753906	5.9	A	0.27417	1.2	A	0.466064	0.8	A	0.780518	3.5	A	0.466064	MG1655_yahD_b0318 DB_XREF=PID:g1786511 SEG=NC_000913:+334504,335109 LEN=605 DEF=putative transcription factor
1759390_s_at	5.8	A	0.19458	14.4	A	0.095215	3.9	A	0.303711	17.7	A	0.111572	17.8	A	0.080566	31.3	A	0.095215	MG1655_yahE_b0319 DB_XREF=PID:g1786512 SEG=NC_000913:+335149,336012 LEN=863 DEF=orf, hypothetical protein
1764752_s_at	0.6	A	0.366211	11.6	A	0.171387	26.8	A	0.111572	17.2	A	0.111572	14.7	A	0.27417	3.8	A	0.432373	MG1655_yahF_b0320 DB_XREF=PID:g1786513 SEG=NC_000913:+336002,337549 LEN=1547 DEF=putative oxidoreductase subunit
1762436_s_at	27.5	P	0.018555	40.5	P	0.046143	47.1	P	0.01416	58.4	P	0.005371	49.7	P	0.018555	33.5	M	0.056152	MG1655_yahG_b0321 DB_XREF=PID:g1786514 SEG=NC_000913:+337549,338967 LEN=1418 DEF=orf, hypothetical protein
1761321_at	8.6	P	0.030273	13	A	0.334473	11.6	M	0.056152	9.2	A	0.303711	13.9	P	0.044434	11.8	A	0.067627	MG1655_yahI_b0323 DB_XREF=PID:g1786516 SEG=NC_000913:+339389,340339 LEN=950 DEF=putative kinase (EC 2.7.2.2).
1768924_s_at	23.5	A	0.334473	14.6	A	0.19458	18.1	A	0.334473	36.9	A	0.095215	6.8	A	0.27417	44.1	A	0.171387	MG1655_yahJ_b0324 DB_XREF=PID:g1786517 SEG=NC_000913:+340349,341731 LEN=1382 DEF=putative deaminase
1768802_s_at	12.8	A	0.111572	7.3	A	0.398926	8.8	A	0.5	8.3	A	0.303711	7.5	A	0.27417	24.5	P	0.035645	MG1655_yahK_b0325 DB_XREF=PID:g1786518 SEG=NC_000913:+342108,343157 LEN=1049 DEF=putative oxidoreductase
1769119_s_at	1	A	0.665527	9.1	A	0.366211	16.5	A	0.219482	1.6	A	0.567627	13.6	A	0.334473	18.8	A	0.129639	MG1655_yahL_b0326 DB_XREF=PID:g1786519 SEG=NC_000913:+343400,344215 LEN=815 DEF=orf, hypothetical protein
1761923_at	2.3	A	0.19458	3.2	A	0.466064	2.2	A	0.32666	1.6	A	0.188965	4	A	0.366211	1.7	A	0.366211	MG1655_yahM_b0327 DB_XREF=PID:g1786521 SEG=NC_000913:+344598,344873 LEN=275 DEF=orf, hypothetical protein
1762866_s_at	0.4	A	0.850342	0.2	A	0.976074	0.2	A	0.901367	0.9	A	0.828613	0.5	A	0.888428	1.8	A	0.80542	MG1655_yahN_b0328 DB_XREF=PID:g1786522 SEG=NC_000913:-344890,345561 LEN=671 DEF=putative cytochrome subunit of dehydrogenase
1765999_s_at	3.2	A	0.432373	1.5	A	0.850342	4.5	A	0.466064	1.1	A	0.696289	1.3	A	0.828613	3.6	A	0.567627	CFT073_yahO_c0449 DB_XREF=26246345 SEG=NC_004431:+436133,436408 LEN=275 DEF=Hypothetical protein yahO precursor
1765295_at	11.2	A	0.366211	20.8	A	0.219482	28.3	A	0.149658	17.6	A	0.219482	24.5	A	0.095215	16.1	A	0.303711	MG1655_prpR_b0330 DB_XREF=PID:g1786524 SEG=NC_000913:-346081,347667 LEN=1586 DEF=regulator for prp operon
1767338_at	30.2	P	0.037598	28.2	P	0.023926	40.5	P	0.010742	34.1	P	0.010742	29	P	0.030273	22.1	P	0.046143	MG1655_prpB_b0331 DB_XREF=PID:g1786525 SEG=NC_000913:+347906,348796 LEN=890 DEF=putative phosphonomutase 2
1763087_s_at	28.5	P	0.037598	47.5	A	0.246094	32.6	A	0.171387	25.3	A	0.129639	33.3	A	0.111572	56.8	A	0.219482	MG1655_prpC_b0333 DB_XREF=PID:g1786527 SEG=NC_000913:+349236,350405 LEN=1169 DEF=putative citrate synthase; propionate metabolism?
1764723_s_at	1.7	A	0.366211	5.1	A	0.533936	2.2	A	0.633789	2.7	A	0.5	11.1	A	0.398926	2.6	A	0.5	MG1655_prpD_b0334 DB_XREF=PID:g1786528 SEG=NC_000913:+350439,351890 LEN=1451 DEF=orf, hypothetical protein
1765367_at	8.1	A	0.398926	17.1	A	0.095215	2.3	A	0.601074	6.1	A	0.27417	10.5	A	0.19458	22.6	A	0.149658	MG1655_prpE_b0335 DB_XREF=PID:g1786529 SEG=NC_000913:+351930,353816 LEN=1886 DEF=putative propionyl-CoA synthetase
1759632_s_at	2.3	A	0.696289	4.6	A	0.601074	3.3	A	0.780518	15.7	A	0.665527	2.6	A	0.780518	2.8	A	0.72583	MG1655_codB_b0336 DB_XREF=PID:g1786530 SEG=NC_000913:+354146,355405 LEN=1259 DEF=cytosine permeasetransport
1767603_s_at	1.4	A	0.753906	1.7	A	0.665527	0.8	A	0.953857	1.4	A	0.828613	1.6	A	0.753906	3.5	A	0.567627	MG1655_codA_b0337 DB_XREF=PID:g1786531 SEG=NC_000913:+355395,356678 LEN=1283 DEF=cytosine deaminase
1759894_s_at	1.9	A	0.80542	1.4	A	0.943848	6.6	A	0.533936	12.6	A	0.466064	3.5	A	0.753906	20.9	A	0.5	MG1655_cynR_b0338 DB_XREF=PID:g1786533 SEG=NC_000913:-357015,357914 LEN=899 DEF=cyn operon positive regulator
1761918_s_at	4.8	A	0.080566	21.7	M	0.056152	15.1	A	0.129639	23	A	0.067627	23.5	A	0.129639	24.4	A	0.080566	MG1655_cynT_b0339 DB_XREF=PID:g1786534 SEG=NC_000913:+358023,358682 LEN=659 DEF=carbonic anhydrase
1761261_s_at	15.6	A	0.080566	33.1	P	0.030273	29	A	0.080566	20.6	P	0.00415	31	P	0.037598	38	P	0.010742	MG1655_cynS_b0340 DB_XREF=PID:g1786535 SEG=NC_000913:+358713,359183 LEN=470 DEF=cyanate aminohydrolase, cyanase
1760037_s_at	5.4	A	0.398926	7.6	A	0.266602	34.9	A	0.080566	49.8	P	0.030273	37.9	A	0.095215	3.8	A	0.366211	MG1655_cynX_b0341 DB_XREF=PID:g1786536 SEG=NC_000913:+359216,360370 LEN=1154 DEF=cyanate transport
1768538_s_at	35.9	P	0.000244	103.8	P	0.000244	125.3	P	0.000244	273.6	P	0.000244	254.7	P	0.000244	225.8	P	0.000244	MG1655_mhpR_b0346 DB_XREF=PID:g1786541 SEG=NC_000913:-366811,367758 LEN=947 DEF=transcriptional regulator for mhp operon
1765064_s_at	41.7	P	0.010742	62.2	P	0.00293	85.3	P	0.000244	169.7	P	0.000244	124.1	P	0.000732	58	P	0.010742	MG1655_mhpA_b0347 DB_XREF=PID:g1786543 SEG=NC_000913:+367835,369499 LEN=1664 DEF=3-(3-hydroxyphenyl)propionate hydroxylase
1767426_s_at	46.5	P	0.01416	123.4	P	0.001221	166.4	P	0.000732	244.1	P	0.000732	173.3	P	0.000732	121	P	0.008057	MG1655_mhpB_b0348 DB_XREF=PID:g1786544 SEG=NC_000913:+369501,370445 LEN=944 DEF=2,3-dihydroxyphenylpropionate 1,2-dioxygenase
1766818_s_at	52	P	0.000732	95.2	P	0.000244	157.3	P	0.000244	196.7	P	0.000244	147.4	P	0.000244	98.2	P	0.000732	MG1655_mhpC_b0349 DB_XREF=PID:g1786545 SEG=NC_000913:+370400,371329 LEN=929 DEF=2-hydroxy-6-ketonona-2,4-dienedioic acid hydrolase
1761035_s_at	34.7	P	0.01416	50	P	0.001953	58.7	P	0.001953	98.4	P	0.001953	110	P	0.000732	78.2	P	0.00415	MG1655_mhpD_b0350 DB_XREF=PID:g1786546 SEG=NC_000913:+371333,372148 LEN=815 DEF=2-keto-4-pentenoate hydratase
1762660_s_at	30.8	A	0.095215	40.6	A	0.129639	64.4	P	0.01416	77	P	0.023926	43.1	P	0.046143	51.9	P	0.046143	MG1655_mhpF_b0351 DB_XREF=PID:g1786547 SEG=NC_000913:+372145,373095 LEN=950 DEF=acetaldehyde dehydrogenase
1765073_s_at	46.4	A	0.067627	44.1	P	0.046143	98.8	P	0.010742	101.6	P	0.000244	106.4	P	0.00293	89.3	P	0.00415	MG1655_mhpE_b0352 DB_XREF=PID:g1786548 SEG=NC_000913:+373092,374105 LEN=1013 DEF=4-hydroxy-2-ketovalerate aldolase
1764562_s_at	45.7	P	0.001953	29.2	P	0.018555	64.2	P	0.00415	102.9	P	0.000244	71.3	P	0.001953	47.9	P	0.00293	MG1655_mhpT_b0353 DB_XREF=PID:g1786549 SEG=NC_000913:+374638,375894 LEN=1256 DEF=putative transport protein
1767817_s_at	899.2	P	0.000732	529	P	0.000732	1277.3	P	0.001221	616.4	P	0.000732	713.8	P	0.001953	504.2	P	0.000732	MG1655_yaiL_b0354 DB_XREF=PID:g1786550 SEG=NC_000913:+375879,376535 LEN=656 DEF=nucleoproteinpolynucleotide-associated enzyme
1768380_s_at	253.2	P	0.000244	221.8	P	0.000244	202.8	P	0.000244	207.4	P	0.000244	200.2	P	0.000244	191.2	P	0.000244	MG1655_frmB_b0355 DB_XREF=PID:g1786551 SEG=NC_000913:-376759,377592 LEN=833 DEF=putative S-formylglutathione hydrolase
1765989_s_at	508.8	P	0.000244	469.3	P	0.000244	451.3	P	0.000244	396.3	P	0.000244	370.4	P	0.000244	449.9	P	0.000244	MG1655_frmA_b0356 DB_XREF=PID:g1786552 SEG=NC_000913:-377686,378795 LEN=1109 DEF=alcohol dehydrogenase class III; formaldehyde dehydrogenase, glutathione-dependent
1765648_s_at	824.5	P	0.000244	663.2	P	0.000732	598.6	P	0.008057	447.6	P	0.001953	445.9	P	0.01416	526.7	P	0.008057	MG1655_frmR_b0357 DB_XREF=PID:g1786553 SEG=NC_000913:-378830,379126 LEN=296 DEF=repressor of frmRAB
1768398_s_at	46.9	P	0.01416	24	P	0.010742	43.3	P	0.010742	55.3	P	0.000244	56.8	P	0.008057	43	P	0.023926	MG1655_yaiO_b0358 DB_XREF=PID:g1786555 SEG=NC_000913:-379293,380066 LEN=773 DEF=orf, hypothetical protein
1760608_s_at	16.4	P	0.030273	43.8	P	0.023926	36.8	P	0.046143	82.1	P	0.00293	63.1	P	0.008057	32	A	0.095215	MG1655_b0359 DB_XREF=PID:g1786556 SEG=NC_000913:-380068,380511 LEN=443 DEF=putative transferase
1761145_s_at	2247.1	P	0.000244	1610.3	P	0.000244	1234.5	P	0.000244	2090.3	P	0.000244	2192	P	0.000244	2121.1	P	0.000244	MG1655_yi21_1_b0360 DB_XREF=PID:g1786557 SEG=NC_000913:+380530,380940 LEN=410 DEF=IS2 hypothetical protein
1759674_s_at	1508.8	P	0.000244	1096.5	P	0.000244	886.4	P	0.000244	1361.2	P	0.000244	1188.2	P	0.000244	1219.5	P	0.000244	MG1655_b1578 DB_XREF=PID:g1787860 SEG=NC_000913:+1648905,1649561 LEN=656 DEF=orf, hypothetical protein
1767707_at	8.9	P	0.023926	11.1	M	0.056152	19.1	P	0.023926	30.7	P	0.010742	20.7	A	0.067627	25.7	A	0.19458	MG1655_b0362 DB_XREF=PID:g1786559 SEG=NC_000913:-381728,382114 LEN=386 DEF=orf, hypothetical protein
1764333_at	12	A	0.19458	18.8	A	0.129639	29.3	A	0.080566	48.7	P	0.010742	59.7	P	0.01416	36.7	M	0.056152	MG1655_yaiP_b0363 DB_XREF=PID:g1786560 SEG=NC_000913:-381963,383159 LEN=1196 DEF=polysaccharide metabolism
1764536_at	13.9	P	0.008057	34.9	P	0.010742	33.6	P	0.01416	41.6	P	0.008057	54.6	P	0.000244	20.9	P	0.005859	MG1655_yaiS_b0364 DB_XREF=PID:g1786561 SEG=NC_000913:-383283,383693 LEN=410 DEF=orf, hypothetical protein
1762595_s_at	22.9	A	0.095215	34.3	P	0.010742	87.5	P	0.001953	179.1	P	0.000244	133.9	P	0.000244	80.5	P	0.000244	MG1655_tauA_b0365 DB_XREF=PID:g1786562 SEG=NC_000913:+384399,385418 LEN=1019 DEF=taurine transport system periplasmic protein
1767795_s_at	39.9	A	0.095215	26.4	A	0.27417	58.9	A	0.149658	123.5	A	0.129639	73.1	A	0.111572	67.6	A	0.334473	MG1655_tauB_b0366 DB_XREF=PID:g1786563 SEG=NC_000913:+385431,386198 LEN=767 DEF=taurine ATP-binding component of a transport system
1767980_s_at	17.6	A	0.398926	3.7	A	0.80542	37.1	A	0.466064	113.4	M	0.056152	55.8	A	0.334473	22.8	A	0.366211	MG1655_tauC_b0367 DB_XREF=PID:g1786564 SEG=NC_000913:+386195,387022 LEN=827 DEF=taurine transport system permease protein
1760412_s_at	52.5	P	0.008057	43.4	P	0.008057	48.4	P	0.037598	191.2	P	0.001953	96.7	P	0.00415	101.4	P	0.018555	CFT073_tauD_c0476 DB_XREF=26246371 SEG=NC_004431:+463087,463938 LEN=851 DEF=Alpha-ketoglutarate-dependent taurine dioxygenase
1763142_s_at	670.4	P	0.000244	1280.3	P	0.000244	1004.1	P	0.000244	790.1	P	0.000244	822.2	P	0.000244	904.3	P	0.000244	MG1655_hemB_b0369 DB_XREF=PID:g1786566 SEG=NC_000913:-387977,388984 LEN=1007 DEF=5-aminolevulinate dehydratase = porphobilinogen synthase
1760756_at	11.6	P	0.000244	22.5	P	0.000244	30	P	0.001221	46	P	0.000732	44.4	P	0.000732	26.1	P	0.000732	MG1655_b0370 DB_XREF=PID:g1786567 SEG=NC_000913:-389121,389390 LEN=269 DEF=orf, hypothetical protein
1760945_at	45.6	P	0.001221	46	P	0.000244	61.1	P	0.000732	117	P	0.000244	70.5	P	0.000244	47.9	P	0.000244	MG1655_yaiT_b0371 DB_XREF=PID:g1786569 SEG=NC_000913:+389475,390935 LEN=1460 DEF=orf, hypothetical protein
1760416_at	82.2	P	0.000732	55.4	P	0.001221	49.8	P	0.001953	103.1	P	0.001221	61.8	P	0.000732	54.3	P	0.005859	MG1655_yaiU_b0374 DB_XREF=PID:g1786572 SEG=NC_000913:+392239,393642 LEN=1403 DEF=putative flagellin structural protein
1765188_s_at	28.3	P	0.001953	74.7	P	0.000244	97.2	P	0.000244	91.7	P	0.000732	62.7	P	0.000244	54.5	P	0.000244	MG1655_yaiV_b0375 DB_XREF=PID:g1786573 SEG=NC_000913:+393685,394353 LEN=668 DEF=orf, hypothetical protein
1767169_s_at	170.6	P	0.000244	86.8	P	0.001221	154.1	P	0.000732	149.6	P	0.000732	112.5	P	0.000732	93.3	P	0.001221	CFT073_yaiH_c0480 DB_XREF=26246375 SEG=NC_004431:-469175,470332 LEN=1157 DEF=Penicillin-binding protein ampH
1760289_s_at	385.9	P	0.000244	288.8	P	0.000244	372.3	P	0.000244	340.8	P	0.000244	322.6	P	0.000244	310.8	P	0.000244	MG1655_sbmA_b0377 DB_XREF=PID:g1786575 SEG=NC_000913:+395863,397083 LEN=1220 DEF=sensitivity to microcin B17, possibly envelop protein
1767116_s_at	803.4	P	0.000244	692.9	P	0.000244	865.9	P	0.000244	541.6	P	0.000244	543.9	P	0.000244	559.3	P	0.000244	MG1655_yaiW_b0378 DB_XREF=PID:g1786576 SEG=NC_000913:+397096,398190 LEN=1094 DEF=orf, hypothetical protein
1768358_s_at	191.4	P	0.000244	254.5	P	0.000244	326	P	0.000732	167.7	P	0.000732	137.5	P	0.00293	142.5	P	0.00293	MG1655_b0379 DB_XREF=PID:g1786577 SEG=NC_000913:-398249,398557 LEN=308 DEF=orf, hypothetical protein
1761079_s_at	267.9	P	0.000244	308.7	P	0.000244	579.5	P	0.000244	1395.2	P	0.000244	1006	P	0.000244	1155.6	P	0.000244	MG1655_b0380 DB_XREF=PID:g1786578 SEG=NC_000913:+398685,399029 LEN=344 DEF=orf, hypothetical protein
1765827_s_at	849.4	P	0.001221	1351.4	P	0.000732	1171.6	P	0.001221	597.7	P	0.001221	592.2	P	0.001221	668.7	P	0.001221	MG1655_ddlA_b0381 DB_XREF=PID:g1786579 SEG=NC_000913:-399053,400147 LEN=1094 DEF=D-alanine-D-alanine ligase A
1769259_s_at	170.6	P	0.000732	171	P	0.000732	364.4	P	0.000732	697.5	P	0.000244	629.6	P	0.000244	723.2	P	0.000244	MG1655_yaiB_b0382 DB_XREF=PID:g1786581 SEG=NC_000913:+400610,400870 LEN=260 DEF=orf, hypothetical protein
1767525_s_at	1045	P	0.000244	193.5	P	0.010742	197.4	P	0.018555	335.9	P	0.00293	348.9	P	0.008057	379.9	P	0.00415	MG1655_phoA_b0383 DB_XREF=PID:g1786582 SEG=NC_000913:+400971,402386 LEN=1415 DEF=alkaline phosphatase
1761076_s_at	277.5	P	0.000244	56.6	P	0.00415	97.8	P	0.008057	108.2	P	0.000244	88.1	P	0.000244	84.6	P	0.000244	MG1655_psiF_b0384 DB_XREF=PID:g1786583 SEG=NC_000913:+402487,402825 LEN=338 DEF=induced by phosphate starvation
1768981_s_at	41.6	P	0.023926	64.5	P	0.046143	78.5	P	0.037598	89.4	P	0.030273	63.4	A	0.067627	50	A	0.111572	MG1655_yaiC_b0385 DB_XREF=PID:g1786584 SEG=NC_000913:+402927,404042 LEN=1115 DEF=orf, hypothetical protein
1763581_s_at	384.5	P	0.000244	386.6	P	0.000732	353.6	P	0.001953	462.7	P	0.000244	437.1	P	0.000244	579.6	P	0.000244	MG1655_proC_b0386 DB_XREF=PID:g1786585 SEG=NC_000913:-404059,404868 LEN=809 DEF=pyrroline-5-carboxylate reductase
1765541_s_at	1486.5	P	0.000244	1368.1	P	0.000244	1056.5	P	0.000244	1166.8	P	0.000244	1156.3	P	0.000244	1353.3	P	0.000244	MG1655_yaiI_b0387 DB_XREF=PID:g1786586 SEG=NC_000913:+404868,405446 LEN=578 DEF=orf, hypothetical protein
1765249_s_at	1226.7	P	0.000244	1068.1	P	0.000244	1078.6	P	0.000244	767.2	P	0.000244	2180.6	P	0.000244	2335.4	P	0.000244	MG1655_aroL_b0388 DB_XREF=PID:g1786587 SEG=NC_000913:+405629,406153 LEN=524 DEF=shikimate kinase II
1764470_s_at	807.3	P	0.000244	703.8	P	0.000244	907	P	0.000244	564.5	P	0.000244	1399.8	P	0.000244	1238.2	P	0.000244	MG1655_yaiA_b0389 DB_XREF=PID:g1786588 SEG=NC_000913:+406203,406394 LEN=191 DEF=orf, hypothetical protein
1768890_s_at	460.5	P	0.000244	255.5	P	0.001953	254.1	P	0.001221	202.7	P	0.000244	359	P	0.000244	264.3	P	0.000244	MG1655_aroM_b0390 DB_XREF=PID:g1786589 SEG=NC_000913:+406652,407329 LEN=677 DEF=protein of aro operon, regulated by aroR
1767988_s_at	2107.4	P	0.000244	2849.6	P	0.000244	2776.2	P	0.000244	2339	P	0.000244	3119.8	P	0.000244	3600.6	P	0.000244	MG1655_yaiE_b0391 DB_XREF=PID:g1786590 SEG=NC_000913:+407401,407685 LEN=284 DEF=orf, hypothetical protein
1765663_s_at	109.8	P	0.000244	40.5	P	0.000244	87.6	P	0.000244	138.2	P	0.000244	109.2	P	0.000244	87.8	P	0.000244	MG1655_b0392 DB_XREF=PID:g1786591 SEG=NC_000913:+407893,408174 LEN=281 DEF=orf, hypothetical protein
1760161_s_at	568.5	P	0.000244	810.1	P	0.000244	592	P	0.000244	461.1	P	0.000244	414.2	P	0.000244	511.3	P	0.000244	MG1655_yaiD_b0393 DB_XREF=PID:g1786592 SEG=NC_000913:-408332,409243 LEN=911 DEF=orf, hypothetical protein
1761516_s_at	180	P	0.023926	253.6	P	0.023926	266.5	P	0.023926	299.6	P	0.023926	266.7	P	0.023926	309.2	P	0.023926	CFT073_c0503 DB_XREF=26246398 SEG=NC_004431:+484051,485097 LEN=1046 DEF=Hypothetical protein yajF
1764050_s_at	160.2	P	0.000244	109.1	P	0.001221	210.4	P	0.000244	136.5	P	0.000244	87.8	P	0.000732	65.3	P	0.000244	MG1655_araJ_b0396 DB_XREF=PID:g1786595 SEG=NC_000913:-410521,411705 LEN=1184 DEF=involved in either transport or processing of arabinose polymers
1768641_at	177.2	P	0.001953	156.4	P	0.010742	197.7	P	0.018555	163	P	0.01416	137.5	P	0.018555	142.7	P	0.023926	MG1655_sbcC_b0397 DB_XREF=PID:g1786597 SEG=NC_000913:-411831,414977 LEN=3146 DEF=ATP-dependent dsDNA exonuclease
1768974_s_at	131.4	P	0.000244	99.1	P	0.000244	98.9	P	0.000244	100.6	P	0.000244	90.8	P	0.000732	83.4	P	0.000244	MG1655_sbcD_b0398 DB_XREF=PID:g1786598 SEG=NC_000913:-414974,416176 LEN=1202 DEF=ATP-dependent dsDNA exonuclease
1762221_s_at	1598.8	P	0.000244	429.4	P	0.000244	444.8	P	0.000244	132.4	P	0.00293	127.9	P	0.010742	128.6	P	0.001953	MG1655_phoB_b0399 DB_XREF=PID:g1786599 SEG=NC_000913:+416366,417055 LEN=689 DEF=positive response regulator for pho regulon, sensor is PhoR (or CreC)
1762633_s_at	381	P	0.000244	51.3	P	0.000244	82.7	P	0.000732	65.3	P	0.000732	47.2	P	0.001953	43.4	P	0.001953	MG1655_phoR_b0400 DB_XREF=PID:g1786600 SEG=NC_000913:+417113,418408 LEN=1295 DEF=positive and negative sensor protein for pho regulon
1764234_s_at	924.8	P	0.000244	536.2	P	0.000244	537.2	P	0.000244	963.7	P	0.000244	825.3	P	0.000244	735.6	P	0.000244	MG1655_brnQ_b0401 DB_XREF=PID:g1786601 SEG=NC_000913:+418815,420134 LEN=1319 DEF=branched chain amino acid transport system II carrier protein
1762158_s_at	769.5	P	0.000244	428.6	P	0.000244	334.1	P	0.000244	604.8	P	0.000244	448.1	P	0.000244	370.4	P	0.000244	MG1655_proY_b0402 DB_XREF=PID:g1786602 SEG=NC_000913:+420210,421583 LEN=1373 DEF=proline permease transport protein
1761601_s_at	186.3	P	0.000244	130.1	P	0.000732	112.6	P	0.000732	182.3	P	0.000732	170.2	P	0.000244	161.8	P	0.000244	MG1655_malZ_b0403 DB_XREF=PID:g1786604 SEG=NC_000913:+421739,423556 LEN=1817 DEF=maltodextrin glucosidase
1765760_s_at	285.2	P	0.000732	227.9	P	0.001221	268.1	P	0.001221	197.8	P	0.001221	136.9	P	0.00293	123.5	P	0.008057	MG1655_yajB_b0404 DB_XREF=PID:g1786605 SEG=NC_000913:-423561,424142 LEN=581 DEF=putative glycoprotein
1768690_s_at	1376.4	P	0.000244	705.8	P	0.000244	713.2	P	0.000244	742.5	P	0.000244	493.4	P	0.000244	435.2	P	0.000244	MG1655_queA_b0405 DB_XREF=PID:g1786606 SEG=NC_000913:+424235,425305 LEN=1070 DEF=synthesis of queuine in tRNA; probably S-adenosylmethionine:tRNA ribosyltransferase-isomerase
1763259_s_at	3030.1	P	0.000244	2312.2	P	0.000244	1867.2	P	0.000244	2021.6	P	0.000244	1606	P	0.000244	1709	P	0.000244	MG1655_tgt_b0406 DB_XREF=PID:g1786607 SEG=NC_000913:+425361,426488 LEN=1127 DEF=tRNA-guanine transglycosylase
1760457_s_at	3031.1	P	0.000244	3296.5	P	0.000244	2689.4	P	0.000244	2543.8	P	0.000244	2818.3	P	0.000244	3224.6	P	0.000244	MG1655_yajC_b0407 DB_XREF=PID:g1786608 SEG=NC_000913:+426511,426843 LEN=332 DEF=orf, hypothetical protein
1767950_s_at	1796	P	0.000244	1159.5	P	0.000244	1079.2	P	0.000244	899	P	0.000244	712.2	P	0.000244	776.7	P	0.000244	MG1655_secD_b0408 DB_XREF=PID:g1786609 SEG=NC_000913:+426871,428718 LEN=1847 DEF=protein secretion; membrane protein, part of the channel
1766621_s_at	2318.7	P	0.000244	2285	P	0.000244	2136.3	P	0.000244	1467.3	P	0.000244	1327.8	P	0.000244	1473.4	P	0.000244	MG1655_secF_b0409 DB_XREF=PID:g1786610 SEG=NC_000913:+428729,429700 LEN=971 DEF=protein secretion, membrane protein
1759212_s_at	1720.3	P	0.000244	1461.7	P	0.000244	1372.1	P	0.000244	1238.8	P	0.000244	1269.4	P	0.000244	1671.8	P	0.000244	MG1655_yajD_b0410 DB_XREF=PID:g1786611 SEG=NC_000913:+429829,430176 LEN=347 DEF=orf, hypothetical protein
1766260_s_at	271.1	P	0.000244	1632.6	P	0.000244	1331.5	P	0.000244	1108.4	P	0.000244	991.6	P	0.000244	1185.8	P	0.000244	MG1655_tsx_b0411 DB_XREF=PID:g1786612 SEG=NC_000913:-430353,431237 LEN=884 DEF=nucleoside channel; receptor of phage T6 and colicin K
1762944_s_at	104.2	P	0.000732	260.7	P	0.000244	287.2	P	0.000244	116.8	P	0.001953	89.4	P	0.000244	60.3	P	0.000244	CFT073_yajI_c0522 DB_XREF=26246417 SEG=NC_004431:-506365,506964 LEN=599 DEF=Hypothetical lipoprotein yajI precursor
1768984_s_at	1192	P	0.000732	1058.3	P	0.000732	835.6	P	0.000732	701.6	P	0.000732	808.9	P	0.001221	851.5	P	0.000732	MG1655_ybaD_b0413 DB_XREF=PID:g1786615 SEG=NC_000913:+432226,432675 LEN=449 DEF=orf, hypothetical protein
1765001_at	1545.7	P	0.000244	1265.3	P	0.000244	747.7	P	0.000244	651.1	P	0.000244	823.6	P	0.000244	701.4	P	0.000244	MG1655_ribD_b0414 DB_XREF=PID:g1786616 SEG=NC_000913:+432679,433782 LEN=1103 DEF=diaminohydroxyphosphoribosylaminopyrimidine deaminase; 5-amino-6-(5-phosphoribosylamino)uracil reductase
1768854_s_at	2906.2	P	0.000244	3478.6	P	0.000244	2530.5	P	0.000244	2215.8	P	0.000244	1955	P	0.000244	2104.4	P	0.000244	MG1655_b0415 DB_XREF=PID:g1786617 SEG=NC_000913:+433871,434341 LEN=470 DEF=riboflavin synthase, beta chain
1764281_s_at	2007.1	P	0.000244	2042.8	P	0.000244	1263.1	P	0.000732	1161.1	P	0.000732	1001.3	P	0.000732	1062.3	P	0.000732	MG1655_nusB_b0416 DB_XREF=PID:g1786618 SEG=NC_000913:+434361,434780 LEN=419 DEF=transcription termination; L factor
1766374_s_at	459.5	P	0.000244	308.8	P	0.00293	325.9	P	0.010742	305.7	P	0.00293	269.7	P	0.010742	253.7	P	0.008057	MG1655_thiL_b0417 DB_XREF=PID:g1786619 SEG=NC_000913:+434858,435835 LEN=977 DEF=thiamin-monophosphate kinase
1765591_s_at	1328.9	P	0.000244	1031.2	P	0.000244	1029.9	P	0.000244	739.9	P	0.000244	731.9	P	0.000244	651.4	P	0.000244	MG1655_pgpA_b0418 DB_XREF=PID:g1786620 SEG=NC_000913:+435813,436331 LEN=518 DEF=phosphatidylglycerophosphatase
1759083_at	440.5	P	0.000244	410.8	P	0.000244	367.9	P	0.000244	770.3	P	0.000244	768.6	P	0.000732	796.1	P	0.000244	MG1655_yajO_b0419 DB_XREF=PID:g1786621 SEG=NC_000913:-436385,437431 LEN=1046 DEF=putative NAD(P)H-dependent xylose reductase
1769070_s_at	1259.3	P	0.000732	744.8	P	0.000732	671.3	P	0.000732	685.9	P	0.000732	532.9	P	0.000732	565.3	P	0.000732	MG1655_dxs_b0420 DB_XREF=PID:g1786622 SEG=NC_000913:-437539,439401 LEN=1862 DEF=1-deoxyxylulose-5-phosphate synthase; flavoprotein
1767532_s_at	1432.9	P	0.000244	763.7	P	0.000244	671.9	P	0.000244	900.8	P	0.000244	800	P	0.000244	858.9	P	0.000244	MG1655_ispA_b0421 DB_XREF=PID:g1786623 SEG=NC_000913:-439426,440325 LEN=899 DEF=geranyltranstransferase
1760128_s_at	1420.6	P	0.000244	1082.3	P	0.000244	941.4	P	0.000244	1314.9	P	0.000732	1134.5	P	0.000732	1105.6	P	0.000732	MG1655_xseB_b0422 DB_XREF=PID:g1786624 SEG=NC_000913:-440325,440567 LEN=242 DEF=exonuclease VII, small subunit
1768961_s_at	538.5	P	0.000244	593	P	0.000244	280.9	P	0.000244	535.5	P	0.000244	428	P	0.000244	251.1	P	0.000244	MG1655_b0423 DB_XREF=PID:g1786625 SEG=NC_000913:+440773,442221 LEN=1448 DEF=putative oxidoreductase
1760757_s_at	111.9	P	0.000244	166.9	P	0.000244	232.4	P	0.000244	142.3	P	0.000244	95.5	P	0.000244	98.7	P	0.000244	MG1655_thiJ_b0424 DB_XREF=PID:g1786626 SEG=NC_000913:-442275,442871 LEN=596 DEF=4-methyl-5(beta-hydroxyethyl)-thiazole monophosphate synthesis
1766310_s_at	496.6	P	0.000244	591.8	P	0.000244	619.8	P	0.000244	466.9	P	0.000244	382.4	P	0.000244	461.1	P	0.000244	MG1655_apbA_b0425 DB_XREF=PID:g1786627 SEG=NC_000913:-442828,443739 LEN=911 DEF=2-dehydropantoate 2-reductase
1768832_s_at	1163.1	P	0.000244	2077.6	P	0.000244	1623.2	P	0.000244	1089.5	P	0.000244	1231.9	P	0.000244	1281.3	P	0.000244	MG1655_yajQ_b0426 DB_XREF=PID:g1786629 SEG=NC_000913:+443889,444398 LEN=509 DEF=orf, hypothetical protein
1764335_s_at	330.8	P	0.000732	204.2	P	0.00293	337.1	P	0.001953	173.8	P	0.001221	125.2	P	0.00293	110.7	P	0.010742	MG1655_yajR_b0427 DB_XREF=PID:g1786630 SEG=NC_000913:-444526,445896 LEN=1370 DEF=putative transport protein
1759601_s_at	2161.2	P	0.000244	3251.8	P	0.000244	2978.7	P	0.000244	1909.3	P	0.000244	2295.7	P	0.000244	2474.6	P	0.000244	MG1655_cyoE_b0428 DB_XREF=PID:g1786631 SEG=NC_000913:-446039,446929 LEN=890 DEF=protoheme IX farnesyltransferase (haeme O biosynthesis)
1764404_s_at	2321.7	P	0.000244	3739	P	0.000244	3166.7	P	0.000244	2221.5	P	0.000244	2816.4	P	0.000244	2965.3	P	0.000244	MG1655_cyoD_b0429 DB_XREF=PID:g1786632 SEG=NC_000913:-446941,447270 LEN=329 DEF=cytochrome o ubiquinol oxidase subunit IV
1767399_s_at	2656.7	P	0.000244	3969.6	P	0.000244	3116.9	P	0.000244	2362.6	P	0.000244	2760.6	P	0.000244	3140	P	0.000244	MG1655_cyoC_b0430 DB_XREF=PID:g1786633 SEG=NC_000913:-447270,447884 LEN=614 DEF=cytochrome o ubiquinol oxidase subunit III
1759374_s_at	2603.5	P	0.000244	3908	P	0.000244	2798.1	P	0.000244	2130.2	P	0.000244	2431.1	P	0.000244	2747.6	P	0.000244	MG1655_cyoB_b0431 DB_XREF=PID:g1786634 SEG=NC_000913:-447874,449865 LEN=1991 DEF=cytochrome o ubiquinol oxidase subunit I
1769018_s_at	2554.9	P	0.000244	4889	P	0.000244	4098	P	0.000244	3707.2	P	0.000244	3545.5	P	0.000244	3872.7	P	0.000244	MG1655_cyoA_b0432 DB_XREF=PID:g1786635 SEG=NC_000913:-449887,450834 LEN=947 DEF=cytochrome o ubiquinol oxidase subunit II
1765440_s_at	759.5	P	0.000244	448.9	P	0.000244	607.9	P	0.000244	391	P	0.000244	244.9	P	0.000244	195	P	0.000244	MG1655_ampG_b0433 DB_XREF=PID:g1786636 SEG=NC_000913:-451294,452769 LEN=1475 DEF=regulates beta-lactamase synthesis
1767715_s_at	2180.8	P	0.000244	2506.7	P	0.000244	2472.5	P	0.000244	1517.5	P	0.000244	1601.6	P	0.000244	1775.6	P	0.000244	SAKAI_ECs0488 DB_XREF=38703867 SEG=NC_002695:-519642,520220 LEN=578 DEF=putative polymeraseproteinase
1760874_s_at	801.8	P	0.000244	1146.9	P	0.000244	1407.7	P	0.000244	987.1	P	0.000244	865	P	0.000244	979.1	P	0.000244	MG1655_bolA_b0435 DB_XREF=PID:g1786638 SEG=NC_000913:+453663,454013 LEN=350 DEF=possible regulator of murein genes
1767122_s_at	3494.6	P	0.000244	6118.8	P	0.000244	4774.5	P	0.000244	2919.2	P	0.000244	3816.3	P	0.000244	3902.8	P	0.000244	MG1655_tig_b0436 DB_XREF=PID:g1786640 SEG=NC_000913:+454357,455655 LEN=1298 DEF=trigger factor; a molecular chaperone involved in cell division
1763709_s_at	1897.6	P	0.000244	1332.4	P	0.000244	1566.3	P	0.000244	1732.7	P	0.000244	1881.6	P	0.000244	1925.8	P	0.000244	MG1655_clpP_b0437 DB_XREF=PID:g1786641 SEG=NC_000913:+455901,456524 LEN=623 DEF=ATP-dependent proteolytic subunit of clpA-clpP serine protease, heat shock protein F21.5
1762543_s_at	2687.8	P	0.000244	2793.8	P	0.000244	2581.8	P	0.000244	1933.3	P	0.000244	2163.8	P	0.000244	2263.3	P	0.000244	MG1655_clpX_b0438 DB_XREF=PID:g1786642 SEG=NC_000913:+456650,457924 LEN=1274 DEF=ATP-dependent specificity component of clpP serine protease, chaperone
1767623_s_at	2066.4	P	0.000244	1594.5	P	0.000244	1385.9	P	0.000244	924.9	P	0.000244	1125.6	P	0.000244	1272.3	P	0.000244	MG1655_lon_b0439 DB_XREF=PID:g1786643 SEG=NC_000913:+458112,460466 LEN=2354 DEF=DNA-binding, ATP-dependent protease La; heat shock K-protein
1765652_s_at	2647.7	P	0.000244	5020.9	P	0.000244	4044.5	P	0.000244	4292	P	0.000244	5187.8	P	0.000244	5634.1	P	0.000244	MG1655_hupB_b0440 DB_XREF=PID:g1786644 SEG=NC_000913:+460675,460947 LEN=272 DEF=DNA-binding protein HU-beta, NS1 (HU-1)
1768821_s_at	2886.7	P	0.000244	2597.1	P	0.000244	2408.1	P	0.000244	2391.7	P	0.000244	2152.3	P	0.000244	2363.1	P	0.000244	MG1655_b0441 DB_XREF=PID:g1786645 SEG=NC_000913:+461139,463010 LEN=1871 DEF=putative protease maturation protein
1766275_s_at	197.6	P	0.000732	192	P	0.000244	202.5	P	0.000244	257.5	P	0.000244	321.1	P	0.000244	308.9	P	0.000244	MG1655_ybaV_b0442 DB_XREF=PID:g1786646 SEG=NC_000913:+463161,463532 LEN=371 DEF=orf, hypothetical protein
1766500_s_at	55.1	P	0.00415	42	P	0.01416	83.5	P	0.00293	74.3	P	0.000732	50.5	P	0.001221	60.6	P	0.010742	MG1655_ybaW_b0443 DB_XREF=PID:g1786647 SEG=NC_000913:+463626,464024 LEN=398 DEF=orf, hypothetical protein
1761865_s_at	708.8	P	0.000244	1003.8	P	0.000732	1094.7	P	0.000244	691.7	P	0.000732	538.3	P	0.00293	566.9	P	0.010742	MG1655_ybaX_b0444 DB_XREF=PID:g1786648 SEG=NC_000913:-464076,464771 LEN=695 DEF=orf, hypothetical protein
1764180_s_at	23	P	0.000244	28.8	P	0.000732	58.2	P	0.000244	65.7	P	0.000244	51.8	P	0.000732	34.3	P	0.000244	MG1655_ybaE_b0445 DB_XREF=PID:g1786650 SEG=NC_000913:-464836,466536 LEN=1700 DEF=orf, hypothetical protein
1767244_s_at	1124.6	P	0.000244	728.2	P	0.000244	633.4	P	0.000244	783.2	P	0.000244	676.7	P	0.000244	670.2	P	0.000244	MG1655_cof_b0446 DB_XREF=PID:g1786651 SEG=NC_000913:+466624,467454 LEN=830 DEF=orf, hypothetical protein
1761295_s_at	1596.6	P	0.000244	560.7	P	0.000244	585.6	P	0.000244	663.8	P	0.000244	258.4	P	0.000732	226.9	P	0.000732	EDL933_ybaO_Z0555 DB_XREF=GI:12513312 SEG=NC_002655:+534449,534907 LEN=458 DEF=putative transcriptional regulator
1760972_s_at	651.2	P	0.000732	146.9	P	0.010742	277.6	P	0.00415	356.4	P	0.00415	133.2	P	0.010742	87.8	P	0.030273	MG1655_mdlA_b0448 DB_XREF=PID:g1786653 SEG=NC_000913:+468095,469867 LEN=1772 DEF=ATP-binding component of a transport system
1763681_s_at	756.3	P	0.000244	178.9	P	0.000244	189.3	P	0.000732	207.9	P	0.000244	108.4	P	0.001221	95.3	P	0.001953	MG1655_mdlB_b0449 DB_XREF=PID:g1786654 SEG=NC_000913:+469860,471641 LEN=1781 DEF=putative ATP-binding component of a transport system
1762736_s_at	125.1	P	0.01416	84.7	P	0.030273	112.4	P	0.037598	93.9	P	0.018555	122.8	P	0.037598	107.7	P	0.023926	MG1655_glnK_b0450 DB_XREF=PID:g1786655 SEG=NC_000913:+471822,472160 LEN=338 DEF=nitrogen regulatory protein P-II 2
1762891_s_at	135.6	P	0.01416	61.5	A	0.080566	116.4	P	0.01416	119.8	P	0.018555	127.5	P	0.023926	121.3	P	0.037598	MG1655_amtB_b0451 DB_XREF=PID:g1786656 SEG=NC_000913:+472190,473476 LEN=1286 DEF=probable ammonium transporter
1759432_s_at	341.1	P	0.000244	546	P	0.000244	612.8	P	0.000244	542.1	P	0.000244	533.3	P	0.000244	428	P	0.000244	MG1655_tesB_b0452 DB_XREF=PID:g1786657 SEG=NC_000913:-473525,474385 LEN=860 DEF=acyl-CoA thioesterase II
1767571_s_at	57.4	P	0.005859	146.3	P	0.000732	167.7	P	0.001221	123.3	P	0.001221	134.6	P	0.005859	103.8	P	0.00415	MG1655_ybaY_b0453 DB_XREF=PID:g1786658 SEG=NC_000913:+474603,475175 LEN=572 DEF=glycoproteinpolysaccharide metabolism
1768391_s_at	177.7	P	0.000244	130.8	P	0.000244	220.9	P	0.000732	402	P	0.000244	221	P	0.000244	159.3	P	0.000244	MG1655_ybaZ_b0454 DB_XREF=PID:g1786659 SEG=NC_000913:-475206,475595 LEN=389 DEF=orf, hypothetical protein
1763985_s_at	6314	P	0.000244	11505.5	P	0.000244	8579.8	P	0.000244	8172.4	P	0.000244	9972.2	P	0.000244	11815.3	P	0.000244	MG1655_ffs_b0455 SEG=NC_000913:+475672,475785 LEN=113 DEF=4.5S RNA; component of ribonucleoprotein particle
1763870_s_at	289	P	0.000244	292.6	P	0.000244	322.4	P	0.000732	116.4	P	0.000244	129.8	P	0.000244	135.8	P	0.000732	MG1655_ybaA_b0456 DB_XREF=PID:g1786661 SEG=NC_000913:+475896,476249 LEN=353 DEF=orf, hypothetical protein
1766544_s_at	173.3	P	0.001221	171.7	P	0.000732	215.4	P	0.000244	99.8	P	0.001221	99.5	P	0.008057	61	P	0.001953	MG1655_ylaB_b0457 DB_XREF=PID:g1786662 SEG=NC_000913:-476291,477847 LEN=1556 DEF=orf, hypothetical protein
1762794_s_at	1682.9	P	0.000244	3082.4	P	0.000244	3019	P	0.000244	1795.8	P	0.000244	1141.2	P	0.000244	1306.9	P	0.000244	MG1655_ylaC_b0458 DB_XREF=PID:g1786663 SEG=NC_000913:-478005,478514 LEN=509 DEF=orf, hypothetical protein
1768948_s_at	538.8	P	0.000244	214.2	P	0.000732	483.4	P	0.000244	250.4	P	0.000244	157.6	P	0.000732	157.1	P	0.000244	MG1655_b0459 DB_XREF=PID:g1786664 SEG=NC_000913:-478591,479142 LEN=551 DEF=putative transferase
1769282_s_at	2331.4	P	0.000244	2334	P	0.000244	3111.6	P	0.000244	2044.3	P	0.000244	1300.2	P	0.000244	1169.5	P	0.000244	MG1655_hha_b0460 DB_XREF=PID:g1786665 SEG=NC_000913:-479314,479532 LEN=218 DEF=haemolysin expression modulating protein
1762315_s_at	3040.4	P	0.000244	2934	P	0.000244	2556	P	0.000244	2473.4	P	0.000244	1968.8	P	0.000244	1952.9	P	0.000244	MG1655_ybaJ_b0461 DB_XREF=PID:g1786666 SEG=NC_000913:-479558,479932 LEN=374 DEF=orf, hypothetical protein
1767319_s_at	2015.1	P	0.000244	1158.8	P	0.000244	1146.1	P	0.000244	1151.5	P	0.000244	1251.1	P	0.000244	1317.4	P	0.000244	EDL933_acrB_Z0576 DB_XREF=GI:12513329 SEG=NC_002655:-547322,550471 LEN=3149 DEF=acridine efflux pump
1767801_s_at	1584.5	P	0.000244	839.9	P	0.000244	960.1	P	0.000244	1106.9	P	0.000244	1033	P	0.000244	1096.8	P	0.000244	MG1655_acrA_b0463 DB_XREF=PID:g1786668 SEG=NC_000913:-483650,484843 LEN=1193 DEF=acridine efflux pump
1761432_s_at	663.1	P	0.000244	395.5	P	0.001953	434.6	P	0.000244	371.6	P	0.000244	248.5	P	0.000244	262.6	P	0.001953	MG1655_acrR_b0464 DB_XREF=PID:g1786669 SEG=NC_000913:+484985,485632 LEN=647 DEF=acrAB operon repressor
1768553_s_at	835	P	0.000244	231.7	P	0.000244	308.4	P	0.000244	229.8	P	0.000244	144.8	P	0.000244	113.8	P	0.000244	MG1655_b0465 DB_XREF=PID:g1786670 SEG=NC_000913:+485760,489122 LEN=3362 DEF=putative alpha helix protein
1760935_s_at	237.3	P	0.000244	349.7	P	0.000244	465.1	P	0.000244	279.1	P	0.000244	270.4	P	0.000244	241.6	P	0.000244	MG1655_ybaM_b0466 DB_XREF=PID:g1786672 SEG=NC_000913:-489334,489495 LEN=161 DEF=orf, hypothetical protein
1769186_s_at	383.8	P	0.000244	487	P	0.000244	516	P	0.000244	435.7	P	0.000244	390.7	P	0.000244	387.9	P	0.000244	MG1655_priC_b0467 DB_XREF=PID:g1786673 SEG=NC_000913:-489509,490036 LEN=527 DEF=primosomal replication protein N
1766551_s_at	591.2	P	0.00293	625.4	P	0.001221	753.2	P	0.023926	172.5	P	0.010742	671.9	P	0.00293	497.7	P	0.008057	MG1655_ybaN_b0468 DB_XREF=PID:g1786674 SEG=NC_000913:+490106,490483 LEN=377 DEF=putative gene 58
1762548_s_at	1418.4	P	0.000244	819.4	P	0.000732	900.9	P	0.000244	624.4	P	0.000732	821.1	P	0.000732	794.9	P	0.000732	MG1655_apt_b0469 DB_XREF=PID:g1786675 SEG=NC_000913:+490636,491187 LEN=551 DEF=adenine phosphoribosyltransferase
1768490_s_at	1794.2	P	0.000244	1119.8	P	0.000244	923.9	P	0.000244	1179.1	P	0.000244	1002.7	P	0.000244	1205	P	0.000244	MG1655_dnaX_b0470 DB_XREF=PID:g1786676 SEG=NC_000913:+491316,493247 LEN=1931 DEF=DNA polymerase III, tau and gamma subunits; DNA elongation factor III
1768942_s_at	3489.4	P	0.000244	4516.1	P	0.000244	3359.1	P	0.000732	3297.6	P	0.000732	3628.5	P	0.000732	3764.4	P	0.000732	MG1655_ybaB_b0471 DB_XREF=PID:g1786677 SEG=NC_000913:+493300,493629 LEN=329 DEF=orf, hypothetical protein
1761684_s_at	1349.6	P	0.000244	1610.8	P	0.000244	1281.3	P	0.000244	933.4	P	0.000244	1055.4	P	0.000244	1016.4	P	0.000244	MG1655_recR_b0472 DB_XREF=PID:g1786678 SEG=NC_000913:+493629,494234 LEN=605 DEF=recombination and repair
1761819_s_at	2056.2	P	0.000244	2070.4	P	0.000244	1198.5	P	0.000244	1342.1	P	0.000244	1830.9	P	0.000244	1880.1	P	0.000244	MG1655_htpG_b0473 DB_XREF=PID:g1786679 SEG=NC_000913:+494344,496218 LEN=1874 DEF=chaperone Hsp90, heat shock protein C 62.5
1762651_s_at	2661.5	P	0.000244	3783.8	P	0.000244	2949.2	P	0.000244	2608.1	P	0.000244	1770.3	P	0.000244	1817.5	P	0.000244	MG1655_adk_b0474 DB_XREF=PID:g1786680 SEG=NC_000913:+496399,497043 LEN=644 DEF=adenylate kinase activity; pleiotropic effects on glycerol-3-phosphate acyltransferase activity
1760653_s_at	220.7	P	0.000244	270	P	0.000244	316.4	P	0.000244	157.6	P	0.000244	157.9	P	0.000244	137.4	P	0.000244	MG1655_hemH_b0475 DB_XREF=PID:g1786681 SEG=NC_000913:+497279,498241 LEN=962 DEF=ferrochelatase: final enzyme of heme biosynthesis
1763391_s_at	63.1	P	0.000244	51.7	P	0.001953	94.4	P	0.005859	106.1	P	0.000244	97.7	P	0.000732	82.4	P	0.000732	MG1655_b0476 DB_XREF=PID:g1786682 SEG=NC_000913:-498238,499197 LEN=959 DEF=putative lipase
1763194_s_at	509	P	0.000244	348.3	P	0.000244	430.4	P	0.000244	302.6	P	0.000244	169.1	P	0.000244	168.4	P	0.000244	MG1655_gsk_b0477 DB_XREF=PID:g1786684 SEG=NC_000913:+499349,500653 LEN=1304 DEF=inosine-guanosine kinase
1762789_s_at	816.9	P	0.000244	349.6	P	0.000732	666.9	P	0.000244	678.6	P	0.000732	700.8	P	0.000732	518.1	P	0.000732	MG1655_ybaL_b0478 DB_XREF=PID:g1786685 SEG=NC_000913:-500786,502462 LEN=1676 DEF=putative transport protein
1763535_s_at	152.4	P	0.000244	105.6	P	0.000732	149.2	P	0.000244	138	P	0.000244	124.7	P	0.008057	133.4	P	0.00415	MG1655_fsr_b0479 DB_XREF=PID:g1786686 SEG=NC_000913:-502700,503920 LEN=1220 DEF=fosmidomycin resistance protein
1767854_s_at	332.9	P	0.000244	438.9	P	0.000244	399.1	P	0.000244	436.5	P	0.000732	567.2	P	0.000732	573.5	P	0.000732	MG1655_ushA_b0480 DB_XREF=PID:g1786687 SEG=NC_000913:+504138,505790 LEN=1652 DEF=UDP-sugar hydrolase (5-nucleotidase)
1767121_s_at	252.3	P	0.000244	286.6	P	0.000244	312.4	P	0.000244	334.2	P	0.000244	275.4	P	0.000244	297.8	P	0.000244	MG1655_ybaK_b0481 DB_XREF=PID:g1786688 SEG=NC_000913:-505827,506306 LEN=479 DEF=orf, hypothetical protein
1768672_s_at	333.9	P	0.000732	397.9	P	0.000732	511.6	P	0.000732	215.4	P	0.000732	180.9	P	0.00293	132.7	P	0.00415	MG1655_ybaP_b0482 DB_XREF=PID:g1786689 SEG=NC_000913:-506510,507304 LEN=794 DEF=putative ligase
1765993_s_at	839.8	P	0.000244	1478.7	P	0.000244	1670.9	P	0.000244	919.8	P	0.000244	816	P	0.000244	890.2	P	0.000244	MG1655_ybaQ_b0483 DB_XREF=PID:g1786690 SEG=NC_000913:+507388,507783 LEN=395 DEF=orf, hypothetical protein
1759550_at	99.7	P	0.000244	97.8	P	0.000732	70.8	P	0.008057	529.1	P	0.000244	293.9	P	0.000244	369.2	P	0.000244	MG1655_b0484 DB_XREF=PID:g1786691 SEG=NC_000913:-508099,510603 LEN=2504 DEF=putative ATPase
1759740_s_at	41.3	P	0.008057	68.1	P	0.008057	94.7	P	0.000732	98.5	P	0.000732	63.7	P	0.000244	64.6	P	0.000244	MG1655_ybaS_b0485 DB_XREF=PID:g1786693 SEG=NC_000913:+510865,511797 LEN=932 DEF=putative glutaminase
1766093_s_at	28.8	P	0.018555	37.4	M	0.056152	67.4	P	0.001953	62.2	P	0.037598	60.5	P	0.018555	41.6	M	0.056152	MG1655_ybaT_b0486 DB_XREF=PID:g1786694 SEG=NC_000913:+511800,513092 LEN=1292 DEF=putative amino acidamine transport protein
1766357_at	1006.2	P	0.000244	623.1	P	0.000244	579.7	P	0.000244	821.9	P	0.000244	898	P	0.000244	804.4	P	0.000244	MG1655_b0487 DB_XREF=PID:g1786695 SEG=NC_000913:+513217,513624 LEN=407 DEF=putative transcriptional regulator
1766335_s_at	178	P	0.000244	172.6	P	0.000244	199.4	P	0.000732	218.8	P	0.000244	234.8	P	0.000244	236.6	P	0.000244	MG1655_ybbJ_b0488 DB_XREF=PID:g1786696 SEG=NC_000913:-513625,514080 LEN=455 DEF=orf, hypothetical protein
1764149_s_at	174.6	P	0.000244	153.1	P	0.001953	192.3	P	0.00415	237.1	P	0.000732	352	P	0.000732	394.5	P	0.000732	EDL933_ybbK_Z0642 DB_XREF=GI:12513379 SEG=NC_002655:-608347,609264 LEN=917 DEF=putative protease
1761921_s_at	185.2	P	0.000244	332.7	P	0.000244	508.9	P	0.000244	277	P	0.000244	265	P	0.000244	236.3	P	0.000244	MG1655_ybbL_b0490 DB_XREF=PID:g1786698 SEG=NC_000913:+515143,515820 LEN=677 DEF=putative ATP-binding component of a transport system
1763027_s_at	102.3	P	0.000244	189	P	0.000244	266.4	P	0.000244	177.9	P	0.000244	129.2	P	0.000244	129.8	P	0.000244	MG1655_ybbM_b0491 DB_XREF=PID:g1786699 SEG=NC_000913:+515780,516586 LEN=806 DEF=putative metal resistance protein
1766513_s_at	1878.9	P	0.000244	1212.3	P	0.000244	1032.1	P	0.000244	1360.3	P	0.000244	1775.2	P	0.000244	1886.5	P	0.000244	MG1655_ybbN_b0492 DB_XREF=PID:g1786700 SEG=NC_000913:-516649,517539 LEN=890 DEF=putative thioredoxin-like protein
1766306_s_at	737.8	P	0.000732	618.6	P	0.000732	622.2	P	0.000244	685.8	P	0.000732	909.4	P	0.000244	852.9	P	0.001221	MG1655_ybbO_b0493 DB_XREF=PID:g1786701 SEG=NC_000913:-517564,518373 LEN=809 DEF=putative oxidoreductase
1759299_s_at	688.9	P	0.000244	408.3	P	0.000244	510.8	P	0.000244	758.5	P	0.000244	953.8	P	0.000244	1095.1	P	0.000244	MG1655_tesA_b0494 DB_XREF=PID:g1786702 SEG=NC_000913:-518363,518989 LEN=626 DEF=acyl-CoA thioesterase I; also functions as protease I
1759185_s_at	478	P	0.000244	129.4	P	0.000732	175.5	P	0.000244	446.8	P	0.000244	263.6	P	0.000244	259.9	P	0.000244	MG1655_ybbA_b0495 DB_XREF=PID:g1786703 SEG=NC_000913:+518957,519643 LEN=686 DEF=putative ATP-binding component of a transport system
1762747_s_at	161.9	P	0.000244	80.2	P	0.000244	96.6	P	0.000244	170.5	P	0.000244	106.2	P	0.000244	101.7	P	0.000732	MG1655_ybbP_b0496 DB_XREF=PID:g1786704 SEG=NC_000913:+519640,522054 LEN=2414 DEF=putative oxidoreductase
1765671_at	96.4	P	0.000244	69.1	P	0.00415	109.6	P	0.001953	157.4	P	0.000244	154.6	P	0.000732	94.5	P	0.001953	MG1655_rhsD_b0497 DB_XREF=PID:g1786706 SEG=NC_000913:+522485,526765 LEN=4280 DEF=rhsD protein in rhs element
1764366_at	262.5	P	0.000244	166.3	P	0.000244	278.3	P	0.000244	389.4	P	0.000244	346.8	P	0.000244	317.8	P	0.000244	MG1655_ybbC_b0498 DB_XREF=PID:g1786707 SEG=NC_000913:+526805,527173 LEN=368 DEF=orf, hypothetical protein
1769139_s_at	119.8	P	0.001221	93	P	0.000732	82.2	P	0.005859	196.2	P	0.001953	156.5	P	0.005859	145.1	P	0.010742	MG1655_b0499 DB_XREF=PID:g1786708 SEG=NC_000913:+527173,527883 LEN=710 DEF=orf, hypothetical protein
1760104_s_at	11.9	P	0.000244	10.2	P	0.000732	11.7	P	0.001221	32.2	P	0.001221	27.3	P	0.000244	8.9	A	0.067627	MG1655_ybbD_b0500 DB_XREF=PID:g1786709 SEG=NC_000913:+527864,528124 LEN=260 DEF=orf, hypothetical protein
1767588_s_at	39.6	P	0.000244	49	P	0.001953	69.6	P	0.000244	71	P	0.000244	52.9	P	0.000732	54.4	P	0.001953	EDL933_Z0654 DB_XREF=GI:12513392 SEG=NC_002655:+621227,621376 LEN=149 DEF=orf, hypothetical protein
1765097_s_at	221.6	P	0.000244	216.6	P	0.000244	156.7	P	0.000244	204.4	P	0.000244	168	P	0.000732	150.8	P	0.000732	MG1655_b0502 DB_XREF=PID:g1786711 SEG=NC_000913:-528869,529276 LEN=407 DEF=orf, hypothetical protein
1759930_s_at	289.3	P	0.000732	270.2	P	0.000732	283.9	P	0.000244	152.9	P	0.000732	113.4	P	0.001953	110.3	P	0.001953	MG1655_ybbB_b0503 DB_XREF=PID:g1786712 SEG=NC_000913:-529356,530450 LEN=1094 DEF=putative capsule anchoring protein
1765285_s_at	48.6	P	0.000244	54.9	P	0.000244	90	P	0.000244	119.9	P	0.000244	79.7	P	0.000244	56.6	P	0.000244	MG1655_ybbS_b0504 DB_XREF=PID:g1786713 SEG=NC_000913:-530519,531445 LEN=926 DEF=putative transcriptional regulator LYSR-type
1760508_s_at	106	P	0.000732	50.1	P	0.001221	71.3	P	0.000732	82.5	P	0.000244	71.3	P	0.000244	93.5	P	0.001953	MG1655_b0505 DB_XREF=PID:g1786714 SEG=NC_000913:+531675,532157 LEN=482 DEF=hypothetical protein
1764090_s_at	860.2	P	0.000244	527.9	P	0.001953	346.9	P	0.000244	713.3	P	0.000244	876.6	P	0.000732	905.5	P	0.001953	MG1655_b0506 DB_XREF=PID:g1786715 SEG=NC_000913:+532235,533050 LEN=815 DEF=putative regulator
1767725_at	44.8	P	0.001953	66.4	P	0.000244	96	P	0.000244	134.3	P	0.000244	104.9	P	0.000244	106.8	P	0.000732	MG1655_gcl_b0507 DB_XREF=PID:g1786717 SEG=NC_000913:+533140,534921 LEN=1781 DEF=glyoxylate carboligase
1764344_s_at	17.7	A	0.067627	39.6	M	0.056152	55.9	P	0.010742	83.7	P	0.001953	60.3	P	0.01416	37.2	A	0.111572	MG1655_b0508 DB_XREF=PID:g1786718 SEG=NC_000913:+534934,535710 LEN=776 DEF=glyoxylate-induced protein
1764045_at	19.2	M	0.056152	23.6	A	0.080566	47.9	P	0.008057	62.5	P	0.00415	39.1	P	0.046143	19.5	A	0.149658	MG1655_b0509 DB_XREF=PID:g1786719 SEG=NC_000913:+535810,536688 LEN=878 DEF=putative oxidoreductase
1765135_s_at	7.2	A	0.111572	14.9	P	0.029053	19.9	P	0.000732	27.3	P	0.001221	22.7	P	0.000244	14.7	P	0.000244	MG1655_ybbV_b0510 DB_XREF=PID:g1786720 SEG=NC_000913:+536720,536998 LEN=278 DEF=orf, hypothetical protein
1764858_s_at	28.4	P	0.010742	64.8	P	0.018555	96.4	P	0.005859	130.4	P	0.010742	71.7	P	0.037598	56.9	A	0.067627	EDL933_Z0665 DB_XREF=GI:12513405 SEG=NC_002655:+629921,631312 LEN=1391 DEF=orf; Unknown function
1763297_s_at	28.5	A	0.149658	57.6	P	0.037598	93.6	P	0.046143	142.3	P	0.001221	134.9	P	0.001953	180.2	P	0.008057	MG1655_b0512 DB_XREF=PID:g1786722 SEG=NC_000913:+538371,539732 LEN=1361 DEF=putative hydrolase
1760558_s_at	17.1	P	0.010742	34.1	P	0.023926	70.3	P	0.008057	87.9	P	0.001953	44.2	A	0.080566	15.4	A	0.19458	MG1655_ybbY_b0513 DB_XREF=PID:g1786723 SEG=NC_000913:+539783,541090 LEN=1307 DEF=putative transport
1759454_s_at	22.7	A	0.067627	22.9	A	0.129639	28.8	A	0.219482	49.1	P	0.037598	33.7	A	0.149658	26.8	A	0.366211	MG1655_b0514 DB_XREF=PID:g1786724 SEG=NC_000913:+541112,542257 LEN=1145 DEF=hypothetical protein
1761331_s_at	164.1	P	0.000732	147.9	P	0.000732	318.4	P	0.000732	453.2	P	0.000244	406.9	P	0.000244	293.9	P	0.000244	MG1655_ylbA_b0515 DB_XREF=PID:g1786725 SEG=NC_000913:-542485,543270 LEN=785 DEF=orf, hypothetical protein
1762397_s_at	4	A	0.303711	12.3	P	0.00293	44.3	P	0.000732	36.1	P	0.000244	12.9	P	0.000244	13	P	0.010742	MG1655_b0516 DB_XREF=PID:g1786726 SEG=NC_000913:-543281,544516 LEN=1235 DEF=putative hydantoin utilization protein
1763399_s_at	11.2	A	0.19458	27.9	P	0.023926	27.1	M	0.056152	66.4	P	0.001221	38.3	P	0.018555	28.5	M	0.056152	MG1655_b0517 DB_XREF=PID:g1786727 SEG=NC_000913:-544538,545587 LEN=1049 DEF=putative malate dehydrogenase
1766828_s_at	39.7	P	0.030273	29.4	P	0.005859	39.6	P	0.01416	30.2	P	0.023926	47.1	P	0.010742	15.6	A	0.19458	MG1655_fdrA_b0518 DB_XREF=PID:g1786729 SEG=NC_000913:+545904,547571 LEN=1667 DEF=involved in protein transport; multicopy suppressor of dominant negative ftsH mutants
1766626_s_at	25.4	P	0.01416	31.4	P	0.030273	39.5	P	0.000244	61.2	P	0.00293	60.7	P	0.00415	40.1	A	0.067627	MG1655_ylbE_b0519 DB_XREF=PID:g1786730 SEG=NC_000913:+547838,548839 LEN=1001 DEF=orf, hypothetical protein
1763148_s_at	24.6	M	0.056152	47.4	P	0.023926	67	A	0.080566	72.1	P	0.030273	71.6	A	0.080566	40.4	A	0.129639	MG1655_ylbF_b0520 DB_XREF=PID:g1786731 SEG=NC_000913:+548850,549665 LEN=815 DEF=putative carboxylase
1760064_s_at	53.1	A	0.080566	50.5	P	0.037598	118.5	P	0.046143	105.1	A	0.149658	74	A	0.171387	45.9	A	0.334473	MG1655_arcC_b0521 DB_XREF=PID:g1786732 SEG=NC_000913:+549662,550555 LEN=893 DEF=putative carbamate kinase (EC 2.7.2.2)
1764190_s_at	231.1	P	0.000244	220.5	P	0.000244	172.5	P	0.000244	179.4	P	0.000244	146.4	P	0.000244	111.9	P	0.000244	MG1655_purK_b0522 DB_XREF=PID:g1786733 SEG=NC_000913:-550750,551817 LEN=1067 DEF=phosphoribosylaminoimidazole carboxylase = AIR carboxylase, CO(2)-fixing subunit
1768393_s_at	350.4	P	0.000732	232.3	P	0.000732	371.7	P	0.000732	159.5	P	0.000244	108.3	P	0.00415	67.7	P	0.046143	MG1655_purE_b0523 DB_XREF=PID:g1786734 SEG=NC_000913:-551814,552323 LEN=509 DEF=phosphoribosylaminoimidazole carboxylase = AIR carboxylase, catalytic subunit
1763828_s_at	396.5	P	0.000244	338.6	P	0.000244	295.8	P	0.000244	217.4	P	0.000732	187.5	P	0.001953	171.3	P	0.000244	MG1655_ybbF_b0524 DB_XREF=PID:g1786735 SEG=NC_000913:-552441,553163 LEN=722 DEF=orf, hypothetical protein
1768443_s_at	2180.1	P	0.000244	4340.2	P	0.000244	3485.8	P	0.000244	2178	P	0.000732	1943.8	P	0.000732	2170.8	P	0.000732	MG1655_ppiB_b0525 DB_XREF=PID:g1786736 SEG=NC_000913:-553166,553660 LEN=494 DEF=peptidyl-prolyl cis-trans isomerase B (rotamase B)
1761081_s_at	912.5	P	0.001221	839.8	P	0.001953	599.1	P	0.023926	525.9	P	0.018555	447.2	P	0.023926	447.2	P	0.023926	MG1655_cysS_b0526 DB_XREF=PID:g1786737 SEG=NC_000913:+553834,555219 LEN=1385 DEF=cysteine tRNA synthetase
1760319_s_at	149.4	P	0.001221	127.8	P	0.000732	217.2	P	0.000732	212.9	P	0.001221	132.8	P	0.001953	79.7	P	0.005859	CFT073_ybcI_c0643 DB_XREF=26246537 SEG=NC_004431:-625090,625527 LEN=437 DEF=Hypothetical protein ybcI
1762749_s_at	400.5	P	0.000244	347.6	P	0.000244	439.9	P	0.000732	295.1	P	0.001221	336.2	P	0.00415	281.8	P	0.00415	MG1655_ybcJ_b0528 DB_XREF=PID:g1786740 SEG=NC_000913:-555884,556117 LEN=233 DEF=orf, hypothetical protein
1766006_s_at	1417.1	P	0.000244	2180.2	P	0.000244	2275.2	P	0.000244	1114.8	P	0.000244	1222.2	P	0.000244	1267.5	P	0.000244	MG1655_folD_b0529 DB_XREF=PID:g1786741 SEG=NC_000913:-556098,556964 LEN=866 DEF=5,10-methylene-tetrahydrofolate dehydrogenase; 5,10-methylene-tetrahydrofolate cyclohydrolase
1766517_s_at	24.6	A	0.111572	34.1	A	0.080566	70.4	P	0.008057	78.9	P	0.00293	50.7	P	0.030273	31.6	A	0.111572	MG1655_sfmA_b0530 DB_XREF=PID:g1786742 SEG=NC_000913:+557402,557977 LEN=575 DEF=putative fimbrial-like protein
1766811_s_at	1.7	A	0.567627	28.1	A	0.19458	26.2	A	0.095215	38.1	A	0.067627	25.6	A	0.19458	19.8	A	0.398926	MG1655_sfmC_b0531 DB_XREF=PID:g1786743 SEG=NC_000913:+558197,558889 LEN=692 DEF=putative chaperone
1763064_s_at	18.8	A	0.111572	23.3	A	0.246094	40	P	0.008057	62.7	P	0.001953	35.2	A	0.111572	19	A	0.27417	MG1655_sfmD_b0532 DB_XREF=PID:g1786744 SEG=NC_000913:+558920,561523 LEN=2603 DEF=putative outer membrane protein, export function
1766324_s_at	1.5	A	0.850342	7.6	A	0.398926	19	A	0.246094	38.4	P	0.005859	8.4	A	0.171387	1.7	A	0.567627	MG1655_sfmH_b0533 DB_XREF=PID:g1786745 SEG=NC_000913:+561565,562542 LEN=977 DEF=involved in fimbrial asembly
1764143_s_at	28.5	P	0.000244	43.8	P	0.000244	72.8	P	0.000732	109.6	P	0.000244	78.2	P	0.000244	58.3	P	0.000244	MG1655_sfmF_b0534 DB_XREF=PID:g1786746 SEG=NC_000913:+562553,563068 LEN=515 DEF=putative fimbrial-like protein
1761716_s_at	60.2	P	0.000244	64.8	P	0.000244	68.4	P	0.000244	147.5	P	0.000244	84.6	P	0.000244	61.1	P	0.000244	MG1655_fimZ_b0535 DB_XREF=PID:g1786747 SEG=NC_000913:-563071,563703 LEN=632 DEF=fimbrial Z protein; probable signal transducer
1767849_at	718.8	P	0.000244	316.4	P	0.000244	590.5	P	0.000732	404.2	P	0.000244	381	P	0.000244	366.7	P	0.000244	MG1655_intD_b0537 DB_XREF=PID:g1786748 SEG=NC_000913:-564038,565201 LEN=1163 DEF=prophage DLP12 integrase
1761154_s_at	113.4	P	0.000244	85.5	P	0.000244	159.9	P	0.000244	163.1	P	0.000244	153.6	P	0.000244	96.3	P	0.000244	MG1655_b0539 DB_XREF=PID:g1786750 SEG=NC_000913:-565321,565584 LEN=263 DEF=putative exonuclease
1762464_at	51	A	0.095215	40.3	A	0.067627	80.5	P	0.01416	106.1	P	0.01416	84.3	P	0.046143	34.1	A	0.171387	MG1655_b0538 DB_XREF=PID:g1786749 SEG=NC_000913:+565195,565755 LEN=560 DEF=putative sensory transduction regulator
1766729_s_at	79.5	P	0.000244	31.9	P	0.001221	118.1	P	0.000732	106.4	P	0.000244	82.6	P	0.000244	63.4	P	0.001221	MG1655_b0542 DB_XREF=PID:g1786754 SEG=NC_000913:+567333,567470 LEN=137 DEF=orf, hypothetical protein
1764829_s_at	201.3	P	0.000244	137.8	P	0.000244	290.5	P	0.000244	161.6	P	0.000244	101.7	P	0.000244	108.4	P	0.000244	MG1655_emrE_b0543 DB_XREF=PID:g1786755 SEG=NC_000913:+567538,567870 LEN=332 DEF=methylviologen resistance
1760519_s_at	60.2	P	0.000244	58.3	P	0.000244	92	P	0.000244	96.3	P	0.000244	74.1	P	0.000244	54.4	P	0.000244	MG1655_ybcK_b0544 DB_XREF=PID:g1786756 SEG=NC_000913:+568125,569651 LEN=1526 DEF=orf, hypothetical protein
1759682_at	83.8	P	0.00415	97.4	P	0.00293	122.2	P	0.01416	203.9	P	0.000244	147.3	P	0.00415	114.2	P	0.00415	MG1655_ybcL_b0545 DB_XREF=PID:g1786757 SEG=NC_000913:+570116,570667 LEN=551 DEF=orf, hypothetical protein
1762841_at	189.4	P	0.001953	119.4	P	0.000732	179.9	P	0.001221	285.4	P	0.000732	178.6	P	0.000732	136.7	P	0.000732	MG1655_ybcM_b0546 DB_XREF=PID:g1786758 SEG=NC_000913:+570677,571474 LEN=797 DEF=putative ARAC-type regulatory protein
1766019_at	7.4	A	0.5	0.7	A	0.904785	20.7	A	0.171387	16.1	A	0.334473	9.5	A	0.398926	8.5	A	0.665527	MG1655_ybcN_b0547 DB_XREF=PID:g1786759 SEG=NC_000913:+571689,572144 LEN=455 DEF=orf, hypothetical protein
1768848_s_at	26.6	P	0.000244	50.7	P	0.000732	44.3	P	0.000244	73	P	0.000244	55.3	P	0.000244	26.8	P	0.000244	MG1655_ninE_b0548 DB_XREF=PID:g1786760 SEG=NC_000913:+572144,572314 LEN=170 DEF=similar to phage 82 and lambda proteins
1759828_s_at	21.6	A	0.171387	34.4	P	0.01416	54.8	P	0.00293	63.9	P	0.001953	34.3	A	0.111572	56.9	P	0.037598	MG1655_ybcO_b0549 DB_XREF=PID:g1786761 SEG=NC_000913:+572307,572597 LEN=290 DEF=orf, hypothetical protein
1765781_s_at	45.8	P	0.00415	62	P	0.000244	93.9	P	0.000244	125	P	0.000244	49.9	P	0.000244	36.8	P	0.010742	EDL933_rus_Z1873 DB_XREF=GI:12514801 SEG=NC_002655:+1709058,1709420 LEN=362 DEF=endodeoxyribonuclease RUS (Holliday junction resolvase) of prophage CP-933X
1765702_s_at	60.4	P	0.01416	83.8	P	0.01416	110.3	P	0.001953	118.1	P	0.000244	103.8	P	0.00415	104.8	P	0.00293	MG1655_ybcQ_b0551 DB_XREF=PID:g1786763 SEG=NC_000913:+573179,573562 LEN=383 DEF=orf, hypothetical protein
1760507_at	32.1	P	0.000244	1034.9	P	0.000244	1189	P	0.000244	2054.2	P	0.000244	2228.4	P	0.000244	2602.7	P	0.000244	MG1655_nmpC_b0553 DB_XREF=PID:g1786765 SEG=NC_000913:-574981,576108 LEN=1127 DEF=outer membrane porin protein; locus of qsr prophage
1768433_at	58.9	P	0.001953	55.7	P	0.001953	63.1	P	0.001953	155.1	P	0.001953	64	P	0.001953	58.5	P	0.001953	MG1655_ybcR_b0554 DB_XREF=PID:g1786767 SEG=NC_000913:+576621,576836 LEN=215 DEF=orf, hypothetical protein
1767133_s_at	39.2	P	0.000732	23	P	0.00293	39.5	P	0.00415	69.4	P	0.000244	60.4	P	0.00293	36.1	P	0.01416	MG1655_ybcS_b0555 DB_XREF=PID:g1786768 SEG=NC_000913:+576836,577333 LEN=497 DEF=bacteriophage lambda lysozyme homolog
1764391_s_at	34.1	P	0.000244	47.6	P	0.000244	70.1	P	0.000244	128.7	P	0.000244	101.2	P	0.000244	66.1	P	0.000244	MG1655_ybcT_b0556 DB_XREF=PID:g1786769 SEG=NC_000913:+577330,577791 LEN=461 DEF=bacteriophage lambda endopeptidase homolog
1761338_s_at	143	P	0.000244	240.5	P	0.000244	213.2	P	0.000732	325.4	P	0.000244	627.6	P	0.000244	695.4	P	0.000244	EDL933_Z1878 DB_XREF=GI:12514806 SEG=NC_002655:-1711823,1712116 LEN=293 DEF=putative Bor protein of prophage CP-933X
1765770_s_at	15.1	P	0.001953	15.7	P	0.008057	23.2	P	0.005859	36	P	0.000244	23.2	P	0.001221	14	P	0.001953	MG1655_ybcV_b0558 DB_XREF=PID:g1786771 SEG=NC_000913:-578407,578859 LEN=452 DEF=putative an envelop protein
1766016_s_at	77.4	P	0.000244	51.5	P	0.000244	55.6	P	0.000244	104.6	P	0.000244	81.1	P	0.000244	48.7	P	0.001953	MG1655_ybcW_b0559 DB_XREF=PID:g1786772 SEG=NC_000913:+579103,579309 LEN=206 DEF=orf, hypothetical protein
1761216_s_at	112.6	P	0.01416	58.8	P	0.030273	130.8	P	0.001221	167	P	0.001221	87.1	P	0.018555	55.2	P	0.018555	MG1655_nohB_b0560 DB_XREF=PID:g1786773 SEG=NC_000913:+580057,580602 LEN=545 DEF=bacteriophage DNA packaging protein
1759647_s_at	103.7	P	0.005859	67	P	0.008057	96.8	P	0.000244	130.7	P	0.000244	73.7	P	0.001953	64.8	P	0.044434	MG1655_ybcX_b0561 DB_XREF=PID:g1786774 SEG=NC_000913:+580577,581320 LEN=743 DEF=orf, hypothetical protein
1760516_s_at	179.8	P	0.001953	175.5	P	0.005859	184.3	P	0.001221	304.4	P	0.001221	196.6	P	0.030273	169.6	A	0.067627	MG1655_ybcY_b0562 DB_XREF=PID:g1786775 SEG=NC_000913:-581375,581959 LEN=584 DEF=orf, hypothetical protein
1766168_s_at	70.7	P	0.001953	25	A	0.466064	69.1	M	0.056152	83.9	P	0.010742	41.7	P	0.037598	28.3	A	0.129639	MG1655_ylcE_b0563 DB_XREF=PID:g2367110 SEG=NC_000913:+582098,582283 LEN=185 DEF=orf, hypothetical protein
1761808_at	801	P	0.000244	755.8	P	0.000244	1063.6	P	0.000244	274.8	P	0.000244	144.4	P	0.000244	114.5	P	0.000244	MG1655_appY_b0564 DB_XREF=PID:g1786776 SEG=NC_000913:+582904,583653 LEN=749 DEF=regulatory protein affecting appA and other genes
1765378_s_at	758.6	P	0.000244	3491.9	P	0.000244	3591.8	P	0.000244	4310	P	0.000244	6136.2	P	0.000244	6985.8	P	0.000244	MG1655_ompT_b0565 DB_XREF=PID:g1786777 SEG=NC_000913:-583903,584856 LEN=953 DEF=outer membrane protein 3b (a), protease VII
1769053_s_at	39	P	0.000244	26.8	P	0.000732	40.3	P	0.000732	47.4	P	0.000244	39.3	P	0.000244	37	P	0.000244	MG1655_envY_b0566 DB_XREF=PID:g1786778 SEG=NC_000913:-585370,586131 LEN=761 DEF=envelope protein; thermoregulation of porin biosynthesis
1767912_s_at	100.9	P	0.000244	88.7	P	0.000244	132.3	P	0.000732	136.1	P	0.001953	135.1	P	0.001953	95.4	P	0.001221	CFT073_ybcH_c0653 DB_XREF=26246545 SEG=NC_004431:-630712,631602 LEN=890 DEF=Hypothetical protein ybcH precursor
1759437_s_at	130.5	P	0.023926	69.8	P	0.023926	73.1	P	0.023926	82.2	P	0.023926	80	P	0.023926	56.8	P	0.023926	MG1655_nfrA_b0568 DB_XREF=PID:g1786780 SEG=NC_000913:-587205,590177 LEN=2972 DEF=bacteriophage N4 receptor, outer membrane protein
1768718_s_at	51	A	0.080566	6.8	A	0.601074	21.5	A	0.334473	62.9	P	0.023926	33.3	A	0.219482	7.5	A	0.696289	MG1655_nfrB_b0569 DB_XREF=PID:g1786781 SEG=NC_000913:-590164,592401 LEN=2237 DEF=bacteriophage N4 receptor, subunit, inner membrane protein
1762564_s_at	374.9	P	0.000244	250.1	P	0.000732	258.8	P	0.000244	308.6	P	0.000244	224.6	P	0.000244	154.6	P	0.000244	MG1655_cusS_b0570 DB_XREF=PID:g1786783 SEG=NC_000913:-592551,593993 LEN=1442 DEF=putative 2-component sensor protein
1760167_s_at	559.1	P	0.001953	185.8	P	0.00293	300	P	0.001953	472.7	P	0.000732	241.1	P	0.001953	243.4	P	0.00293	MG1655_b0571 DB_XREF=PID:g1786784 SEG=NC_000913:-593983,594666 LEN=683 DEF=putative 2-component transcriptional regulator
1759239_s_at	15.5	A	0.466064	24	A	0.398926	44.7	A	0.246094	486.3	P	0.001221	235.8	P	0.00415	301.5	P	0.00293	MG1655_b0572 DB_XREF=PID:g1786785 SEG=NC_000913:+594823,596196 LEN=1373 DEF=putative resistance protein
1761044_at	23.5	A	0.19458	33.3	A	0.129639	61.3	A	0.111572	2632.9	P	0.000244	1475.3	P	0.000244	2136	P	0.000244	MG1655_ylcC_b0573 DB_XREF=PID:g1786786 SEG=NC_000913:+596354,596686 LEN=332 DEF=orf, hypothetical protein
1762007_s_at	27.9	P	0.000732	73.8	P	0.008057	83.9	P	0.001953	850	P	0.000244	360	P	0.000244	500	P	0.000244	MG1655_b0574 DB_XREF=PID:g1786787 SEG=NC_000913:+596702,597925 LEN=1223 DEF=putative resistance protein
1767887_s_at	44.8	P	0.030273	28.2	A	0.149658	74.2	M	0.056152	710.9	P	0.000244	279.9	P	0.00415	438.7	P	0.001221	MG1655_b0575 DB_XREF=PID:g1786788 SEG=NC_000913:+597937,601080 LEN=3143 DEF=YbdE
1760559_s_at	199.2	P	0.000244	114.3	P	0.001953	166.8	P	0.000244	331	P	0.000244	128	P	0.00293	111	P	0.00293	MG1655_pheP_b0576 DB_XREF=PID:g1786789 SEG=NC_000913:+601182,602558 LEN=1376 DEF=phenylalanine-specific transport system
1765087_s_at	230.9	P	0.000244	263.2	P	0.001221	321.5	P	0.000732	221.5	P	0.000244	127.8	P	0.000732	140.3	P	0.001221	MG1655_ybdG_b0577 DB_XREF=PID:g1786791 SEG=NC_000913:-602639,603886 LEN=1247 DEF=putative transport
1759291_s_at	959.2	P	0.000244	1433.2	P	0.000244	1321	P	0.000244	871.1	P	0.000732	1034	P	0.001221	1028.4	P	0.001221	MG1655_nfnB_b0578 DB_XREF=PID:g1786792 SEG=NC_000913:-603994,604647 LEN=653 DEF=oxygen-insensitive NAD(P)H nitroreductase
1759624_s_at	308.5	P	0.000732	421.8	P	0.000244	493.3	P	0.000732	400.2	P	0.000244	449.7	P	0.000244	397.1	P	0.000244	MG1655_ybdF_b0579 DB_XREF=PID:g1786793 SEG=NC_000913:-604741,605109 LEN=368 DEF=orf, hypothetical protein
1765637_s_at	276.5	P	0.000244	592.5	P	0.000244	780.8	P	0.000244	635.5	P	0.000244	465.3	P	0.000244	464.9	P	0.000244	MG1655_ybdJ_b0580 DB_XREF=PID:g1786794 SEG=NC_000913:-605174,605422 LEN=248 DEF=orf, hypothetical protein
1760063_s_at	31.4	A	0.095215	50.9	A	0.149658	75.3	M	0.056152	50.8	A	0.219482	32.5	A	0.334473	36.6	A	0.533936	MG1655_ybdK_b0581 DB_XREF=PID:g1786795 SEG=NC_000913:-605488,606606 LEN=1118 DEF=orf, hypothetical protein
1764857_s_at	64.5	P	0.030273	46.2	A	0.219482	112.3	M	0.056152	123.3	P	0.005859	62.9	A	0.129639	40.2	A	0.27417	MG1655_hokE_b4415 SEG=NC_000913:+607059,607211 LEN=152 DEF=small toxic membrane polypeptide
1766597_s_at	227.8	P	0.000977	60.4	P	0.032227	30.4	P	0.007813	52.4	P	0.00293	131.9	P	0.000977	129.2	P	0.004883	MG1655_entD_b0583 DB_XREF=PID:g1786797 SEG=NC_000913:-608682,609311 LEN=629 DEF=enterochelin synthetase, component D
1766589_s_at	385.9	P	0.00293	235.2	P	0.01416	267	P	0.010742	216.3	P	0.046143	821	P	0.001221	785.3	P	0.000244	MG1655_fepA_b0584 DB_XREF=PID:g1786798 SEG=NC_000913:-609477,611717 LEN=2240 DEF=outer membrane receptor for ferric enterobactin (enterochelin) and colicins B and D
1760554_s_at	65.3	P	0.018555	100.2	P	0.00293	111.7	P	0.008057	108.4	P	0.01416	173.2	P	0.005859	126.7	P	0.00415	MG1655_fes_b0585 DB_XREF=PID:g1786799 SEG=NC_000913:+612038,613162 LEN=1124 DEF=enterochelin esterase
1759774_at	100.8	P	0.023926	66.9	P	0.037598	63.6	A	0.067627	97.5	M	0.056152	202.6	P	0.008057	197.9	P	0.010742	MG1655_entF_b0586 DB_XREF=PID:g1786801 SEG=NC_000913:+613380,617261 LEN=3881 DEF=ATP-dependent serine activating enzyme (may be part of enterobactin synthase as component F)
1768501_s_at	21.9	P	0.001221	34.3	P	0.000244	46.5	P	0.000244	67.4	P	0.000244	52.7	P	0.000244	32.9	P	0.000244	MG1655_fepE_b0587 DB_XREF=PID:g1786802 SEG=NC_000913:+617477,618610 LEN=1133 DEF=ferric enterobactin (enterochelin) transport
1762805_s_at	185.4	P	0.000244	319.1	P	0.000244	261.7	P	0.000244	156.6	P	0.001221	324.6	P	0.000244	310.6	P	0.000244	MG1655_fepC_b0588 DB_XREF=PID:g1786803 SEG=NC_000913:-618607,619422 LEN=815 DEF=ATP-binding component of ferric enterobactin transport
1760499_s_at	154.8	P	0.023926	192.4	P	0.01416	221.4	P	0.046143	89.4	P	0.01416	181.4	P	0.01416	171	P	0.010742	MG1655_fepG_b0589 DB_XREF=PID:g1786804 SEG=NC_000913:-619419,620411 LEN=992 DEF=ferric enterobactin transport protein
1763777_s_at	290.4	P	0.000244	403	P	0.000244	430.4	P	0.000244	239	P	0.000244	473.2	P	0.000244	469.6	P	0.000244	MG1655_fepD_b0590 DB_XREF=PID:g1786805 SEG=NC_000913:-620408,621412 LEN=1004 DEF=ferric enterobactin (enterochelin) transport
1768028_s_at	171	P	0.018555	107.2	P	0.023926	183.2	P	0.00293	155.4	P	0.010742	199.3	P	0.010742	149.3	P	0.023926	MG1655_ybdA_b0591 DB_XREF=PID:g1786806 SEG=NC_000913:+621523,622773 LEN=1250 DEF=putative transport
1768432_s_at	80.3	P	0.000732	132.7	P	0.000732	135.4	P	0.00293	68.2	P	0.01416	122.2	P	0.00415	110.9	P	0.001953	MG1655_fepB_b0592 DB_XREF=PID:g1786807 SEG=NC_000913:-622777,623733 LEN=956 DEF=ferric enterobactin (enterochelin) binding protein; periplasmic component
1767506_s_at	100.1	P	0.00293	110.3	P	0.00415	125.7	P	0.010742	42.5	P	0.010742	193.4	P	0.008057	294.4	P	0.01416	MG1655_entC_b0593 DB_XREF=PID:g1786809 SEG=NC_000913:+624108,625283 LEN=1175 DEF=isochorismate hydroxymutase 2, enterochelin biosynthesis
1768256_at	53.2	P	0.000244	28.5	P	0.001221	54.9	P	0.000732	46.9	P	0.000244	76.5	P	0.000244	64.2	P	0.000244	MG1655_entE_b0594 DB_XREF=PID:g1786810 SEG=NC_000913:+625293,626903 LEN=1610 DEF=2,3-dihydroxybenzoate-AMP ligase
1765518_s_at	357	P	0.000732	172.6	P	0.000244	180.1	P	0.000244	158.3	P	0.000244	1268	P	0.000244	1586.6	P	0.000244	MG1655_entB_b0595 DB_XREF=PID:g1786811 SEG=NC_000913:+626917,627774 LEN=857 DEF=2,3-dihydro-2,3-dihydroxybenzoate synthetase, isochroismatase
1765233_s_at	378.4	P	0.000244	132.9	P	0.005859	158.6	P	0.00415	184.9	P	0.001953	861.8	P	0.000244	994.4	P	0.000244	MG1655_entA_b0596 DB_XREF=PID:g1786812 SEG=NC_000913:+627774,628520 LEN=746 DEF=2,3-dihydro-2,3-dihydroxybenzoate dehydrogenase, enterochelin biosynthesis
1761866_s_at	396.2	P	0.000244	127.1	P	0.001221	194.7	P	0.005859	152.2	P	0.010742	786.7	P	0.000732	868.4	P	0.000244	MG1655_ybdB_b0597 DB_XREF=PID:g1786813 SEG=NC_000913:+628523,628936 LEN=413 DEF=orf, hypothetical protein
1766639_s_at	295	P	0.000244	131.6	P	0.000244	151.8	P	0.000244	3154.1	P	0.000244	3155.3	P	0.000244	3769.2	P	0.000244	MG1655_cstA_b0598 DB_XREF=PID:g1786814 SEG=NC_000913:+629117,631222 LEN=2105 DEF=carbon starvation protein
1762969_s_at	149.9	P	0.01416	196.9	P	0.01416	140.9	P	0.010742	244	P	0.018555	191.2	P	0.046143	119.4	A	0.095215	MG1655_ybdH_b0599 DB_XREF=PID:g1786815 SEG=NC_000913:-631612,632700 LEN=1088 DEF=putative oxidoreductase
1764188_s_at	42.5	P	0.030273	48.3	P	0.018555	57.6	P	0.01416	81.3	P	0.001221	55.7	P	0.00415	48.2	P	0.00293	MG1655_ybdL_b0600 DB_XREF=PID:g1786816 SEG=NC_000913:+632809,633969 LEN=1160 DEF=putative aminotransferase
1763941_s_at	32.1	P	0.000244	34.8	P	0.001221	55.8	P	0.000244	66.7	P	0.000244	37.1	P	0.000244	34.4	P	0.00415	MG1655_ybdM_b0601 DB_XREF=PID:g1786817 SEG=NC_000913:-633970,634599 LEN=629 DEF=orf, hypothetical protein
1765197_s_at	36.7	P	0.000732	52.5	P	0.000732	68.3	P	0.000244	82.7	P	0.000244	57.1	P	0.005859	55.1	P	0.001221	MG1655_ybdN_b0602 DB_XREF=PID:g1786818 SEG=NC_000913:-634572,635792 LEN=1220 DEF=orf, hypothetical protein
1759296_s_at	22	P	0.000732	42.2	P	0.000244	58.6	P	0.000244	44.4	P	0.000244	21.8	P	0.000732	19.8	P	0.000244	MG1655_ybdO_b0603 DB_XREF=PID:g1786820 SEG=NC_000913:-635939,636841 LEN=902 DEF=putative transcriptional regulator LYSR-type
1762886_s_at	281.3	P	0.000244	364.9	P	0.000244	349.6	P	0.000244	330.5	P	0.000244	411.8	P	0.000244	384.4	P	0.000244	MG1655_dsbG_b0604 DB_XREF=PID:g1786821 SEG=NC_000913:-637050,637856 LEN=806 DEF=thiol:disulfide interchange protein
1767961_s_at	3465.5	P	0.000244	6617.3	P	0.000244	4858	P	0.000244	4375.5	P	0.000244	5677.5	P	0.000244	6285.6	P	0.000244	MG1655_ahpC_b0605 DB_XREF=PID:g1786822 SEG=NC_000913:+638168,638731 LEN=563 DEF=alkyl hydroperoxide reductase, C22 subunit; detoxification of hydroperoxides
1766531_s_at	931	P	0.000244	1280.3	P	0.000244	1144.2	P	0.000244	763.2	P	0.000244	827.3	P	0.000244	872.5	P	0.000244	CFT073_ahpF_c0695 DB_XREF=26246587 SEG=NC_004431:+681648,683243 LEN=1595 DEF=Alkyl hydroperoxide reductase subunit F
1768363_s_at	366.6	P	0.000244	734	P	0.000244	1130.8	P	0.000244	604.2	P	0.000244	697.3	P	0.000244	689.9	P	0.000244	MG1655_ybdQ_b0607 DB_XREF=PID:g1786824 SEG=NC_000913:-640662,641090 LEN=428 DEF=orf, hypothetical protein
1764339_s_at	97.3	P	0.01416	93.6	P	0.023926	150.4	P	0.008057	126.4	P	0.010742	135.5	P	0.037598	103.7	P	0.037598	MG1655_ybdR_b0608 DB_XREF=PID:g1786825 SEG=NC_000913:+641311,642549 LEN=1238 DEF=putative oxidoreductase
1760936_s_at	92.1	P	0.010742	97.8	P	0.005859	127.8	P	0.008057	176.5	P	0.001953	89.1	P	0.030273	73.8	P	0.01416	CFT073_c0697 DB_XREF=26246589 SEG=NC_004431:+684077,684460 LEN=383 DEF=Conserved hypothetical protein
1762975_s_at	395.3	P	0.000244	414.8	P	0.000244	543.6	P	0.000732	1131.8	P	0.000244	799.2	P	0.000244	774.1	P	0.000244	MG1655_rnk_b0610 DB_XREF=PID:g1786827 SEG=NC_000913:-642780,643190 LEN=410 DEF=regulator of nucleoside diphosphate kinase
1766647_s_at	629.4	P	0.000244	868.7	P	0.000244	940.5	P	0.000244	563.9	P	0.000244	533.3	P	0.000732	595.4	P	0.000244	MG1655_rna_b0611 DB_XREF=PID:g1786828 SEG=NC_000913:-643420,644226 LEN=806 DEF=RNase I, cleaves phosphodiester bond between any two nucleotides
1759810_s_at	19.1	P	0.005615	39.2	P	0.037598	58.4	P	0.010742	79.8	P	0.010742	54.5	P	0.023926	28.6	A	0.111572	MG1655_b0612 DB_XREF=PID:g1786829 SEG=NC_000913:-644340,645803 LEN=1463 DEF=YbdS
1763769_s_at	15.5	A	0.171387	30.8	A	0.149658	35.6	P	0.023926	55.3	P	0.010742	22.3	A	0.080566	15.6	A	0.111572	MG1655_citG_b0613 DB_XREF=PID:g1786830 SEG=NC_000913:-645854,646732 LEN=878 DEF=orf, hypothetical protein
1766120_s_at	28.2	A	0.111572	57.6	P	0.018555	84.9	P	0.00293	114.8	P	0.00293	81.6	P	0.005859	59.7	A	0.129639	MG1655_ybdU_b0614 DB_XREF=PID:g1786831 SEG=NC_000913:-646707,647258 LEN=551 DEF=orf, hypothetical protein
1765926_s_at	51.1	M	0.056152	59.8	P	0.030273	81.6	A	0.080566	114	P	0.037598	64.7	P	0.037598	52.6	A	0.067627	MG1655_citF_b0615 DB_XREF=PID:g1786832 SEG=NC_000913:-647262,648794 LEN=1532 DEF=citrate lyase alpha chain
1763934_s_at	15.7	A	0.466064	73.2	A	0.219482	104.3	A	0.246094	168.6	A	0.111572	104.9	A	0.219482	35.5	A	0.334473	MG1655_citE_b0616 DB_XREF=PID:g1786833 SEG=NC_000913:-648805,649728 LEN=923 DEF=citrate lyase beta chain acyl lyase subunit
1761048_s_at	8.8	A	0.334473	26.8	P	0.037598	32.4	A	0.095215	62.1	P	0.018555	39.8	A	0.067627	27.2	A	0.129639	MG1655_citD_b0617 DB_XREF=PID:g1786834 SEG=NC_000913:-649710,650006 LEN=296 DEF=citrate lyase acyl carrier protein (gamma chain)
1766065_s_at	8.5	A	0.398926	39.5	A	0.219482	28.5	A	0.095215	89.2	P	0.023926	33	A	0.067627	3.9	A	0.466064	CFT073_citC_c0709 DB_XREF=26246599 SEG=NC_004431:-691390,692397 LEN=1007 DEF=(Citrate (pro-3S)-lyase) ligase
1767837_s_at	149	P	0.000244	103	P	0.000244	85.2	P	0.000244	163.9	P	0.000244	127.7	P	0.000244	117.9	P	0.000244	MG1655_citA_b0619 DB_XREF=PID:g1786837 SEG=NC_000913:+651458,653116 LEN=1658 DEF=putative sensor-type protein
1760214_s_at	180.2	P	0.001953	137.4	P	0.005859	131.9	P	0.010742	215	P	0.005859	147.8	P	0.01416	150.5	P	0.005859	MG1655_citB_b0620 DB_XREF=PID:g1786838 SEG=NC_000913:+653085,653765 LEN=680 DEF=sequence similarity to Shigella regulator
1764082_s_at	59.9	P	0.000244	62.1	P	0.005859	128.8	P	0.000732	122.6	P	0.037598	68.4	P	0.01416	71.4	P	0.037598	MG1655_dcuC_b0621 DB_XREF=PID:g1786839 SEG=NC_000913:-653806,655191 LEN=1385 DEF=transport of dicarboxylates
1764471_s_at	123.3	P	0.000244	106.3	P	0.000244	177.4	P	0.000244	177.9	P	0.000244	144.5	P	0.000244	134.1	P	0.000244	MG1655_crcA_b0622 DB_XREF=PID:g1786840 SEG=NC_000913:+655780,656340 LEN=560 DEF=orf, hypothetical protein
1766690_s_at	6793.6	P	0.000244	10742	P	0.000244	10185.9	P	0.000244	9760.6	P	0.000244	10390.2	P	0.000244	11674.2	P	0.000244	MG1655_cspE_b0623 DB_XREF=PID:g1786841 SEG=NC_000913:+656515,656724 LEN=209 DEF=cold shock protein
1759303_s_at	519.7	P	0.000244	524.9	P	0.000244	733.8	P	0.000244	364.4	P	0.000244	254.5	P	0.000244	230.4	P	0.000244	MG1655_crcB_b0624 DB_XREF=PID:g1786842 SEG=NC_000913:-656778,657161 LEN=383 DEF=orf, hypothetical protein
1764881_s_at	426.7	P	0.000732	225.5	P	0.000732	248.1	P	0.000244	310	P	0.000244	311.5	P	0.000732	315.8	P	0.000732	MG1655_ybeH_b0625 DB_XREF=PID:g1786843 SEG=NC_000913:+657254,657481 LEN=227 DEF=orf, hypothetical protein
1759265_s_at	155.1	P	0.001221	60.2	A	0.095215	90.2	P	0.046143	120.2	P	0.008057	84.3	P	0.037598	71.7	P	0.030273	MG1655_ybeM_b0626 DB_XREF=PID:g1786844 SEG=NC_000913:+657478,658041 LEN=563 DEF=putative amidase
1764826_s_at	2143.9	P	0.000244	1453.1	P	0.000244	1605	P	0.000244	1694.3	P	0.000244	1539.8	P	0.000244	1723.4	P	0.000244	MG1655_b0627 DB_XREF=PID:g1786845 SEG=NC_000913:+658170,658373 LEN=203 DEF=hypothetical protein
1767694_s_at	1553.8	P	0.000732	1696	P	0.00415	1660.6	P	0.001953	2040.1	P	0.000732	1433.1	P	0.00415	1713.7	P	0.001953	MG1655_lipA_b0628 DB_XREF=PID:g1786846 SEG=NC_000913:-658474,659439 LEN=965 DEF=lipoate synthesis, sulfur insertion?
1760715_s_at	67.7	P	0.001953	62.5	P	0.001953	69.4	P	0.001221	73.1	P	0.001221	61.7	P	0.00415	35.7	P	0.005859	MG1655_ybeF_b0629 DB_XREF=PID:g1786847 SEG=NC_000913:-659648,660448 LEN=800 DEF=putative transcriptional regulator LYSR-type
1759242_s_at	1016.9	P	0.000244	570.3	P	0.000244	579.3	P	0.000244	531.9	P	0.000732	402.2	P	0.001221	320.2	P	0.001221	MG1655_lipB_b0630 DB_XREF=PID:g1786848 SEG=NC_000913:-660860,661435 LEN=575 DEF=protein of lipoate biosynthesis
1766049_s_at	3301.4	P	0.000244	1610.1	P	0.000244	1265.3	P	0.000244	3446.2	P	0.000244	2910.9	P	0.000244	2921.4	P	0.000244	MG1655_ybeD_b0631 DB_XREF=PID:g1786850 SEG=NC_000913:-661602,661865 LEN=263 DEF=orf, hypothetical protein
1762424_s_at	1399.1	P	0.000244	1035.1	P	0.000244	975.8	P	0.000244	812	P	0.000244	682.1	P	0.000244	674.6	P	0.000244	MG1655_dacA_b0632 DB_XREF=PID:g1786851 SEG=NC_000913:-661975,663186 LEN=1211 DEF=D-alanyl-D-alanine carboxypeptidase, fraction A; penicillin-binding protein 5
1766189_s_at	1037.6	P	0.000244	559.5	P	0.000244	534.9	P	0.000244	540.3	P	0.000244	497.3	P	0.000244	440.8	P	0.000244	MG1655_rlpA_b0633 DB_XREF=PID:g1786852 SEG=NC_000913:-663325,664413 LEN=1088 DEF=a minor lipoprotein
1766194_s_at	887.6	P	0.000244	335.2	P	0.000244	368.8	P	0.000732	291.8	P	0.000732	255.3	P	0.000732	235.3	P	0.000732	MG1655_mrdB_b0634 DB_XREF=PID:g1786853 SEG=NC_000913:-664424,665536 LEN=1112 DEF=rod shape-determining membrane protein; sensitivity to radiation and drugs
1761305_s_at	846.6	P	0.000244	295.6	P	0.000244	338.9	P	0.000244	253.9	P	0.000244	198.8	P	0.000244	222.5	P	0.000244	MG1655_mrdA_b0635 DB_XREF=PID:g1786854 SEG=NC_000913:-665539,667440 LEN=1901 DEF=cell elongation, e phase; peptidoglycan synthetase; penicillin-binding protein 2
1766638_s_at	1620.2	P	0.001221	698.5	P	0.018555	821.8	P	0.018555	650.8	P	0.018555	719.8	P	0.023926	603.6	P	0.018555	MG1655_ybeA_b0636 DB_XREF=PID:g1786855 SEG=NC_000913:-667471,667938 LEN=467 DEF=orf, hypothetical protein
1768552_s_at	1784.3	P	0.000244	829.4	P	0.000244	754.3	P	0.000244	849.8	P	0.000244	786	P	0.000244	821.5	P	0.000244	MG1655_ybeB_b0637 DB_XREF=PID:g1786856 SEG=NC_000913:-667942,668151 LEN=209 DEF=orf, hypothetical protein
1767684_s_at	454.3	P	0.000244	159.2	P	0.000244	144.8	P	0.001953	177.1	P	0.000732	145.1	P	0.000244	118.9	P	0.000244	MG1655_phpB_b0638 DB_XREF=PID:g1786857 SEG=NC_000913:-668519,669130 LEN=611 DEF=homolog of Salmonella cobC, a phosphohistidine protein
1759729_s_at	1204.5	P	0.000244	454.2	P	0.000244	520.6	P	0.000244	434	P	0.000244	459.6	P	0.000244	442.8	P	0.000244	MG1655_b0639 DB_XREF=PID:g1786858 SEG=NC_000913:-669154,669795 LEN=641 DEF=hypothetical protein
1761898_s_at	765.2	P	0.000244	280.2	P	0.000244	332.3	P	0.000244	265	P	0.000244	269.2	P	0.000244	215.2	P	0.000244	MG1655_holA_b0640 DB_XREF=PID:g1786859 SEG=NC_000913:-669797,670828 LEN=1031 DEF=DNA polymerase III, delta subunit
1766757_s_at	2175	P	0.000244	1482.4	P	0.000244	1483.4	P	0.000244	1156.3	P	0.000244	1420.6	P	0.000244	1196.7	P	0.000244	MG1655_rlpB_b0641 DB_XREF=PID:g1786860 SEG=NC_000913:-670828,671409 LEN=581 DEF=a minor lipoprotein
1763031_s_at	2078.9	P	0.000244	1080.4	P	0.000244	1065.5	P	0.000244	1155.9	P	0.000244	1119.3	P	0.000244	1087.3	P	0.000244	MG1655_leuS_b0642 DB_XREF=PID:g1786861 SEG=NC_000913:-671424,674006 LEN=2582 DEF=leucine tRNA synthetase
1765202_s_at	206.4	P	0.001953	253.2	P	0.000732	328.8	P	0.000244	683.1	P	0.000244	806.9	P	0.000244	803.3	P	0.000244	MG1655_ybeL_b0643 DB_XREF=PID:g1786863 SEG=NC_000913:+674241,674723 LEN=482 DEF=putative alpha helical protein
1762280_at	42.5	P	0.000244	39.6	P	0.005859	49.7	P	0.000732	96.7	P	0.000244	47.7	P	0.000244	50.2	P	0.005859	MG1655_ybeQ_b0644 DB_XREF=PID:g1786864 SEG=NC_000913:-674793,675776 LEN=983 DEF=orf, hypothetical protein
1759710_at	8.8	A	0.095215	31.9	P	0.023926	47.7	P	0.00293	49.8	P	0.001221	36	P	0.018555	26.4	P	0.00293	MG1655_ybeR_b0645 DB_XREF=PID:g1786865 SEG=NC_000913:+675934,676641 LEN=707 DEF=orf, hypothetical protein
1762641_at	41.4	A	0.129639	28.5	A	0.067627	73.4	A	0.080566	43.5	A	0.080566	29.9	A	0.149658	41.2	A	0.129639	MG1655_ybeS_b0646 DB_XREF=PID:g1786866 SEG=NC_000913:+676638,678065 LEN=1427 DEF=putative enzyme of polynucleotide modification
1765651_s_at	2.6	A	0.633789	13.2	A	0.111572	45.9	A	0.080566	38.2	P	0.037598	19.6	A	0.111572	16.6	A	0.171387	MG1655_ybeT_b0647 DB_XREF=PID:g1786867 SEG=NC_000913:-678075,678629 LEN=554 DEF=orf, hypothetical protein
1761059_s_at	32.9	A	0.111572	35.8	P	0.037598	52.5	P	0.005859	64.6	P	0.00415	47.3	P	0.005859	36.4	P	0.037598	MG1655_ybeU_b0648 DB_XREF=PID:g1786868 SEG=NC_000913:+678731,679438 LEN=707 DEF=putative tRNA ligase
1760552_at	84.7	P	0.000732	79	P	0.000732	102.9	P	0.000732	111.4	P	0.000244	100.6	P	0.000732	86.4	P	0.000732	MG1655_ybeV_b0649 DB_XREF=PID:g1786869 SEG=NC_000913:+679435,680886 LEN=1451 DEF=orf, hypothetical protein
1763280_s_at	49.8	P	0.023926	63.4	P	0.023926	93.7	P	0.018555	123.8	P	0.023926	84.2	P	0.023926	76.1	P	0.023926	MG1655_b0650 DB_XREF=PID:g1786870 SEG=NC_000913:-680946,682616 LEN=1670 DEF=DnaK-like protein
1766971_s_at	91.8	P	0.000732	155.1	P	0.000244	184.6	P	0.000732	476.3	P	0.000244	415.6	P	0.000244	426.7	P	0.000244	MG1655_b0651 DB_XREF=PID:g1786871 SEG=NC_000913:-682700,683635 LEN=935 DEF=putative tRNA synthetase
1765895_s_at	359.9	P	0.00293	579.6	P	0.000732	530.5	P	0.00293	851.7	P	0.00415	842.2	P	0.005859	911.8	P	0.00293	MG1655_gltL_b0652 DB_XREF=PID:g1786872 SEG=NC_000913:-683753,684478 LEN=725 DEF=ATP-binding protein of glutamateaspartate transport system
1765435_s_at	238.2	P	0.000244	251.7	P	0.001221	316.2	P	0.000732	663.8	P	0.000732	482.8	P	0.000732	476.5	P	0.000732	MG1655_gltK_b0653 DB_XREF=PID:g1786873 SEG=NC_000913:-684478,685152 LEN=674 DEF=glutamateaspartate transport system permease
1768428_s_at	189.6	P	0.000244	237.7	P	0.000244	236.8	P	0.000244	550.7	P	0.000244	407.9	P	0.000244	373.1	P	0.000244	MG1655_gltJ_b0654 DB_XREF=PID:g1786874 SEG=NC_000913:-685152,685892 LEN=740 DEF=glutamateaspartate transport system permease
1761724_s_at	499.6	P	0.000244	983.3	P	0.000244	907.8	P	0.000244	2512.2	P	0.000244	2416.7	P	0.000244	2546.4	P	0.000244	MG1655_b0655 DB_XREF=PID:g1786876 SEG=NC_000913:-686062,686970 LEN=908 DEF=putative periplasmic binding transport protein
1767311_s_at	899.7	P	0.000732	431	P	0.010742	377.6	P	0.010742	264.7	P	0.008057	343.3	P	0.005859	257.6	P	0.005859	MG1655_lnt_b0657 DB_XREF=PID:g1786878 SEG=NC_000913:-688566,690104 LEN=1538 DEF=apolipoprotein N-acyltransferase, copper homeostasis protein, inner membrane
1761804_s_at	1445.5	P	0.000244	1064.3	P	0.000244	917	P	0.000244	592.5	P	0.000244	616.1	P	0.000244	636.2	P	0.000244	MG1655_ybeX_b0658 DB_XREF=PID:g1786879 SEG=NC_000913:-690129,691007 LEN=878 DEF=putative transport protein
1759770_s_at	1125.2	P	0.000244	677	P	0.000244	724.1	P	0.000244	469	P	0.000244	617.1	P	0.000244	477.5	P	0.000244	MG1655_ybeY_b0659 DB_XREF=PID:g1786880 SEG=NC_000913:-691097,691564 LEN=467 DEF=orf, hypothetical protein
1759574_s_at	1763.7	P	0.000244	1404.7	P	0.000244	993.7	P	0.000244	1051.3	P	0.000244	1301	P	0.000244	1183.8	P	0.000244	MG1655_ybeZ_b0660 DB_XREF=PID:g1786881 SEG=NC_000913:-691561,692640 LEN=1079 DEF=putative ATP-binding protein in pho regulon
1762792_s_at	759.7	P	0.000244	575.3	P	0.000244	438.2	P	0.000244	443.1	P	0.000244	457.6	P	0.000244	404.2	P	0.000244	MG1655_yleA_b0661 DB_XREF=PID:g1786882 SEG=NC_000913:-692754,694178 LEN=1424 DEF=orf, hypothetical protein
1768050_s_at	438.6	P	0.000244	416	P	0.000244	361.7	P	0.000244	355.8	P	0.000732	359.8	P	0.000732	439.3	P	0.000732	MG1655_b0662 DB_XREF=PID:g1786883 SEG=NC_000913:+694324,695499 LEN=1175 DEF=hypothetical protein
1763837_s_at	1119.4	P	0.000244	648.4	P	0.000244	741.4	P	0.000244	498.9	P	0.000244	503.3	P	0.000244	539.2	P	0.000244	MG1655_asnB_b0674 DB_XREF=PID:g1786889 SEG=NC_000913:-696736,698400 LEN=1664 DEF=asparagine synthetase B
1768266_s_at	802.3	P	0.000244	704.7	P	0.000244	702.5	P	0.000244	625.9	P	0.000244	671.5	P	0.000244	674.5	P	0.000244	MG1655_nagD_b0675 DB_XREF=PID:g1786890 SEG=NC_000913:-698797,699549 LEN=752 DEF=N-acetylglucosamine metabolism
1763339_s_at	995.6	P	0.000732	714.7	P	0.001221	754.5	P	0.001221	665.5	P	0.00293	662.6	P	0.00415	565.6	P	0.005859	MG1655_nagC_b0676 DB_XREF=PID:g1786891 SEG=NC_000913:-699597,700817 LEN=1220 DEF=transcriptional repressor of nag (N-acetylglucosamine) operon
1761958_s_at	243.4	P	0.000244	338.6	P	0.000244	324.5	P	0.000244	250	P	0.000244	544.5	P	0.000244	551	P	0.000244	MG1655_nagA_b0677 DB_XREF=PID:g1786892 SEG=NC_000913:-700826,701974 LEN=1148 DEF=N-acetylglucosamine-6-phosphate deacetylase
1762099_s_at	166.1	P	0.000244	260.9	P	0.000244	308.6	P	0.000244	238.5	P	0.000244	426.9	P	0.000244	478.4	P	0.000244	MG1655_nagB_b0678 DB_XREF=PID:g1786893 SEG=NC_000913:-702034,702834 LEN=800 DEF=glucosamine-6-phosphate deaminase
1762936_s_at	87.3	P	0.00415	51.8	P	0.001953	88.8	P	0.00415	143	P	0.00293	232	P	0.000732	253.2	P	0.000732	MG1655_nagE_b0679 DB_XREF=PID:g1786894 SEG=NC_000913:+703167,705113 LEN=1946 DEF=PTS system, N-acetylglucosamine-specific enzyme IIABC
1765309_s_at	1949.6	P	0.000244	1684.8	P	0.000244	1674.9	P	0.000244	990.3	P	0.000244	945.1	P	0.000244	1003.8	P	0.000244	MG1655_glnS_b0680 DB_XREF=PID:g1786895 SEG=NC_000913:+705316,706980 LEN=1664 DEF=glutamine tRNA synthetase
1761785_s_at	23.6	P	0.037598	20.4	P	0.037598	54.9	P	0.001221	38.1	P	0.001953	26.9	P	0.005859	36.4	P	0.010742	MG1655_ybfM_b0681 DB_XREF=PID:g1786897 SEG=NC_000913:+707557,708963 LEN=1406 DEF=orf, hypothetical protein
1764405_s_at	231.9	P	0.000732	204.2	P	0.000732	201.3	P	0.001221	193.9	P	0.000244	228.8	P	0.000244	212.4	P	0.001953	MG1655_ybfN_b0682 DB_XREF=PID:g1786898 SEG=NC_000913:+709013,709339 LEN=326 DEF=orf, hypothetical protein
1765071_s_at	3199.8	P	0.000244	4852.5	P	0.000244	4811.1	P	0.000244	4023.7	P	0.000244	4440.2	P	0.000244	4698.1	P	0.000244	MG1655_fur_b0683 DB_XREF=PID:g1786899 SEG=NC_000913:-709423,709869 LEN=446 DEF=negative regulator
1760593_s_at	2201.7	P	0.000244	1941.2	P	0.000244	1750.8	P	0.000244	2396.7	P	0.000244	2045.8	P	0.000244	2305.8	P	0.000244	MG1655_fldA_b0684 DB_XREF=PID:g1786900 SEG=NC_000913:-710158,710688 LEN=530 DEF=flavodoxin 1
1763243_s_at	968.7	P	0.000732	1007.9	P	0.000244	739.2	P	0.000732	358.5	P	0.001221	612.1	P	0.000244	560	P	0.001221	MG1655_ybfE_b0685 DB_XREF=PID:g1786901 SEG=NC_000913:-710828,711190 LEN=362 DEF=orf, hypothetical protein
1768864_s_at	171.5	P	0.000732	155.2	P	0.000244	149.6	P	0.000244	187.6	P	0.000244	189.7	P	0.000244	174.1	P	0.000244	MG1655_ybfF_b0686 DB_XREF=PID:g1786902 SEG=NC_000913:-711261,712025 LEN=764 DEF=orf, hypothetical protein
1767237_s_at	1381	P	0.000244	1391.2	P	0.000244	1269.4	P	0.000244	1107.2	P	0.000244	1042.3	P	0.000244	1061.6	P	0.000244	MG1655_seqA_b0687 DB_XREF=PID:g1786903 SEG=NC_000913:+712210,712755 LEN=545 DEF=negative modulator of initiation of replication
1764176_s_at	1169.8	P	0.000244	1251.6	P	0.000244	1304.1	P	0.000244	955.3	P	0.000244	1033.2	P	0.000244	1065.8	P	0.000244	MG1655_pgm_b0688 DB_XREF=PID:g1786904 SEG=NC_000913:+712781,714421 LEN=1640 DEF=phosphoglucomutase
1767606_at	111.6	P	0.000244	213.2	P	0.000244	257.5	P	0.000244	126.6	P	0.000244	89.4	P	0.000244	66.1	P	0.000244	MG1655_ybfP_b0689 DB_XREF=PID:g1786905 SEG=NC_000913:+714635,715129 LEN=494 DEF=putative pectinase
1763351_at	44.5	P	0.01416	62.4	P	0.010742	106.8	P	0.010742	126.6	P	0.001221	71.2	P	0.01416	60.3	P	0.046143	MG1655_ybfG_b0690 DB_XREF=PID:g1786906 SEG=NC_000913:-715170,715532 LEN=362 DEF=orf, hypothetical protein
1760922_at	14.9	A	0.246094	28.3	P	0.023926	45.1	A	0.129639	97.8	P	0.030273	31.9	A	0.171387	25	A	0.19458	MG1655_ybfH_b0691 DB_XREF=PID:g1786907 SEG=NC_000913:-715611,715928 LEN=317 DEF=orf, hypothetical protein
1767922_s_at	134.9	P	0.001953	77.8	P	0.001953	84.5	P	0.000244	146.2	P	0.000732	126.4	P	0.000732	82.3	P	0.001953	MG1655_potE_b0692 DB_XREF=PID:g1786908 SEG=NC_000913:-716169,717488 LEN=1319 DEF=putrescine transport protein
1759091_at	7.6	A	0.466064	35.3	A	0.067627	61	P	0.023926	74.4	P	0.005859	62.2	P	0.01416	35.5	A	0.095215	MG1655_speF_b0693 DB_XREF=PID:g1786909 SEG=NC_000913:-717485,719683 LEN=2198 DEF=ornithine decarboxylase isozyme, inducible
1765728_s_at	168.2	P	0.000732	174.5	P	0.000732	217.2	P	0.000732	178.3	P	0.001953	197.2	P	0.001221	130.7	P	0.000244	MG1655_kdpE_b0694 DB_XREF=PID:g1786911 SEG=NC_000913:-720279,720956 LEN=677 DEF=regulator of kdp operon (transcriptional effector)
1768620_s_at	369.9	P	0.000244	133.4	P	0.001221	264	P	0.001221	308	P	0.001221	210	P	0.001953	187.2	P	0.001221	MG1655_kdpD_b0695 DB_XREF=PID:g1786912 SEG=NC_000913:-720953,723637 LEN=2684 DEF=sensor for high-affinity potassium transport system
1769182_s_at	195.5	P	0.000244	82.7	P	0.000732	120.3	P	0.000732	184.5	P	0.000244	130.1	P	0.00415	120.1	P	0.001221	MG1655_kdpC_b0696 DB_XREF=PID:g1786913 SEG=NC_000913:-723630,724202 LEN=572 DEF=high-affinity potassium transport system
1766600_s_at	27.3	A	0.633789	26.8	A	0.5	3.5	A	0.696289	47.6	A	0.567627	11.2	A	0.601074	9.7	A	0.753906	MG1655_kdpB_b0697 DB_XREF=PID:g1786914 SEG=NC_000913:-724211,726259 LEN=2048 DEF=ATPase of high-affinity potassium transport system, B chain
1761427_at	16.8	A	0.171387	36.1	A	0.111572	60.6	A	0.080566	37	P	0.030273	43.1	A	0.067627	22.4	A	0.171387	MG1655_kdpA_b0698 DB_XREF=PID:g1786915 SEG=NC_000913:-726282,727955 LEN=1673 DEF=ATPase of high-affinity potassium transport system, A chain
1766489_s_at	1301.9	P	0.000244	825.8	P	0.000732	1052.9	P	0.000244	1068.6	P	0.000732	1100.3	P	0.000732	1273.8	P	0.000732	MG1655_ybfA_b0699 DB_XREF=PID:g1786916 SEG=NC_000913:+728357,728563 LEN=206 DEF=orf, hypothetical protein
1766469_s_at	193	P	0.000244	110.9	P	0.001221	151	P	0.000244	189.8	P	0.000244	147.5	P	0.000732	145	P	0.000244	MG1655_b0701 DB_XREF=PID:g1786918 SEG=NC_000913:+732593,732814 LEN=221 DEF=orf, hypothetical protein
1762319_at	165.2	P	0.000244	53.8	P	0.01416	44.4	P	0.00415	73.6	P	0.000732	67.3	P	0.00293	38.1	P	0.000732	MG1655_rhsC_b0700 DB_XREF=PID:g1786917 SEG=NC_000913:+728806,732999 LEN=4193 DEF=RhsC
1761447_s_at	67.8	P	0.000244	27.3	P	0.01416	50.2	P	0.00415	83	P	0.000244	59.3	P	0.00293	33.4	P	0.005859	MG1655_ybfB_b0702 DB_XREF=PID:g1786919 SEG=NC_000913:+732999,733325 LEN=326 DEF=orf, hypothetical protein
1766622_s_at	78.2	P	0.001221	22.6	P	0.005859	51.6	P	0.000244	64.6	P	0.000244	25	P	0.000244	46.1	P	0.000244	MG1655_b0703 DB_XREF=PID:g1786921 SEG=NC_000913:+733443,734876 LEN=1433 DEF=orf, hypothetical protein
1768410_s_at	44.5	P	0.000732	43.2	P	0.00293	48.1	P	0.000244	94.5	P	0.000244	48.7	P	0.000732	53.7	P	0.000244	MG1655_ybfC_b0704 DB_XREF=PID:g1786922 SEG=NC_000913:+734873,735442 LEN=569 DEF=orf, hypothetical protein
1766930_s_at	196.7	P	0.000244	384.2	P	0.000244	459.1	P	0.000244	448.4	P	0.000244	428.7	P	0.000244	313.2	P	0.000244	MG1655_ydcC_b1460 DB_XREF=PID:g1787733 SEG=NC_000913:+1529840,1530976 LEN=1136 DEF=H repeat-associated protein (ORF-H)
1768185_at	8.5	P	0.023926	17.4	A	0.095215	9.4	M	0.056152	17.8	P	0.023926	20.1	P	0.046143	13.5	A	0.171387	MG1655_ybfD_b0706 DB_XREF=PID:g1786924 SEG=NC_000913:+737315,738076 LEN=761 DEF=putative DNA ligase
1768055_s_at	39.8	P	0.001953	44.1	P	0.00293	71.8	P	0.000244	90.6	P	0.000732	67.2	P	0.001953	23.5	P	0.005859	MG1655_ybgA_b0707 DB_XREF=PID:g1786925 SEG=NC_000913:+738224,738733 LEN=509 DEF=orf, hypothetical protein
1760354_at	138.8	P	0.00415	73.5	P	0.010742	141.3	P	0.010742	126	P	0.00293	106.9	P	0.001221	82.9	P	0.00293	MG1655_phrB_b0708 DB_XREF=PID:g1786926 SEG=NC_000913:+738730,740148 LEN=1418 DEF=deoxyribodipyrimidine photolyase (photoreactivation)
1761801_s_at	370	P	0.000244	38.5	P	0.00293	87.9	P	0.001221	108.4	P	0.000244	61.8	P	0.001221	52.2	P	0.008057	CFT073_ybgH_c0788 DB_XREF=26246678 SEG=NC_004431:-772142,773623 LEN=1481 DEF=Hypothetical transporter ybgH
1766367_s_at	922.8	P	0.000244	651.6	P	0.000244	761.2	P	0.000244	1270.9	P	0.000244	1495.4	P	0.000244	1649.6	P	0.000244	MG1655_ybgI_b0710 DB_XREF=PID:g1786928 SEG=NC_000913:+742050,742793 LEN=743 DEF=orf, hypothetical protein
1759549_s_at	391.7	P	0.000244	219.9	P	0.000244	291.7	P	0.000244	553.9	P	0.000244	568	P	0.000244	466.6	P	0.000244	MG1655_ybgJ_b0711 DB_XREF=PID:g1786929 SEG=NC_000913:+742816,743472 LEN=656 DEF=putative carboxylase
1762871_s_at	417.1	P	0.000244	209	P	0.000244	215.4	P	0.001221	450.5	P	0.000244	437.7	P	0.000732	427.9	P	0.000244	MG1655_ybgK_b0712 DB_XREF=PID:g1786930 SEG=NC_000913:+743466,744398 LEN=932 DEF=putative carboxylase
1765892_s_at	652.5	P	0.000244	384.4	P	0.001221	333.6	P	0.001221	358.5	P	0.001953	425.2	P	0.001953	408.5	P	0.001953	MG1655_ybgL_b0713 DB_XREF=PID:g1786931 SEG=NC_000913:+744388,745122 LEN=734 DEF=putative lactam utilization protein
1765777_s_at	301.2	P	0.001221	189.2	P	0.005859	237.4	P	0.00415	179.6	P	0.005859	165.9	P	0.030273	130	P	0.046143	MG1655_nei_b0714 DB_XREF=PID:g1786932 SEG=NC_000913:+745158,745949 LEN=791 DEF=endonuclease VIII and DNA N-glycosylase with an AP lyase activity
1769217_at	68.1	P	0.001221	69.8	P	0.00415	155.6	P	0.000244	68.6	P	0.005859	64.7	P	0.010742	48.5	P	0.010742	MG1655_abrB_b0715 DB_XREF=PID:g1786933 SEG=NC_000913:-745946,747037 LEN=1091 DEF=putative transport protein
1759241_at	51	P	0.001221	55.6	P	0.00293	53.9	P	0.000244	105.2	P	0.000244	56.5	P	0.00293	54.9	P	0.00415	MG1655_ybgO_b0716 DB_XREF=PID:g1786935 SEG=NC_000913:-747144,748232 LEN=1088 DEF=orf, hypothetical protein
1759367_at	41.1	P	0.001221	46.3	P	0.00293	59.9	P	0.000244	78.6	P	0.000244	41.3	P	0.01416	39.1	P	0.023926	MG1655_ybgP_b0717 DB_XREF=PID:g1786936 SEG=NC_000913:-748202,748930 LEN=728 DEF=putative chaperone
1769165_at	13.9	P	0.023926	20.9	A	0.149658	36	P	0.046143	43.9	P	0.018555	27.7	M	0.056152	19.7	P	0.030273	MG1655_ybgQ_b0718 DB_XREF=PID:g1786937 SEG=NC_000913:-748945,751401 LEN=2456 DEF=putative outer membrane protein
1766988_at	22.7	P	0.005859	75.1	P	0.000244	106.4	P	0.001221	117.4	P	0.000732	99.7	P	0.000732	80.7	P	0.000732	MG1655_ybgD_b0719 DB_XREF=PID:g1786938 SEG=NC_000913:-751452,752018 LEN=566 DEF=putative fimbrial-like protein
1762086_s_at	63.5	P	0.000244	134.2	P	0.000244	194.3	P	0.000244	704.7	P	0.000244	1081.6	P	0.000244	1157.4	P	0.000244	MG1655_gltA_b0720 DB_XREF=PID:g1786939 SEG=NC_000913:-752408,753691 LEN=1283 DEF=citrate synthase
1767518_s_at	51.1	P	0.00415	870.2	P	0.000244	1047.6	P	0.000244	2203.5	P	0.000244	2302.9	P	0.000244	1585.1	P	0.000244	MG1655_sdhC_b0721 DB_XREF=PID:g1786940 SEG=NC_000913:+754400,754789 LEN=389 DEF=succinate dehydrogenase, cytochrome b556
1767040_s_at	56.8	P	0.001953	824.9	P	0.000244	655	P	0.000244	1910.7	P	0.000244	1543.6	P	0.000244	1657.7	P	0.000244	MG1655_sdhD_b0722 DB_XREF=PID:g1786941 SEG=NC_000913:+754783,755130 LEN=347 DEF=succinate dehydrogenase, hydrophobic subunit
1762750_s_at	150.5	P	0.000732	1272.9	P	0.000244	1036.8	P	0.000244	2603.3	P	0.000244	2536.9	P	0.000244	2865.6	P	0.000244	MG1655_sdhA_b0723 DB_XREF=PID:g1786942 SEG=NC_000913:+755130,756896 LEN=1766 DEF=succinate dehydrogenase, flavoprotein subunit
1769260_s_at	180.1	P	0.001953	1020.2	P	0.000244	1073.2	P	0.000244	2530.9	P	0.000244	2448.4	P	0.000244	2595.2	P	0.000244	MG1655_sdhB_b0724 DB_XREF=PID:g1786943 SEG=NC_000913:+756912,757628 LEN=716 DEF=succinate dehydrogenase, iron sulfur protein
1765654_s_at	221.5	P	0.000732	1411.6	P	0.000244	834.7	P	0.000244	2418.3	P	0.000244	2495.3	P	0.000244	2775.1	P	0.000244	MG1655_b0725 DB_XREF=PID:g1786944 SEG=NC_000913:+757687,757947 LEN=260 DEF=orf, hypothetical protein
1766868_s_at	334.6	P	0.000244	1103.4	P	0.000244	807.9	P	0.000244	3088.3	P	0.000244	3040.9	P	0.000244	3299.3	P	0.000244	MG1655_sucA_b0726 DB_XREF=PID:g1786945 SEG=NC_000913:+757929,760730 LEN=2801 DEF=2-oxoglutarate dehydrogenase (decarboxylase component)
1760290_s_at	585.5	P	0.000244	1705.3	P	0.000244	1147.4	P	0.000244	4006.7	P	0.000244	3959.8	P	0.000244	4697.9	P	0.000244	MG1655_sucB_b0727 DB_XREF=PID:g1786946 SEG=NC_000913:+760745,761962 LEN=1217 DEF=2-oxoglutarate dehydrogenase (dihydrolipoyltranssuccinase E2 component)
1769042_s_at	409	P	0.00293	1090.9	P	0.001221	852.1	P	0.000732	4179.2	P	0.000244	4010.7	P	0.000244	4733.7	P	0.000244	MG1655_sucC_b0728 DB_XREF=PID:g1786948 SEG=NC_000913:+762237,763403 LEN=1166 DEF=succinyl-CoA synthetase, beta subunit
1767719_s_at	497.3	P	0.000732	1203.5	P	0.000732	981.6	P	0.000244	5089.9	P	0.000244	4850.2	P	0.000244	5947.9	P	0.000244	MG1655_sucD_b0729 DB_XREF=PID:g1786949 SEG=NC_000913:+763403,764272 LEN=869 DEF=succinyl-CoA synthetase, alpha subunit
1762020_at	276.5	P	0.000732	234.9	P	0.000732	362.6	P	0.000732	195.6	P	0.000732	197.1	P	0.001221	183.7	P	0.000732	MG1655_farR_b0730 DB_XREF=PID:g1786950 SEG=NC_000913:-764376,765098 LEN=722 DEF=transcriptional regulator of succinylCoA synthetase operon
1763431_at	25.5	P	0.010742	27.3	P	0.046143	40.7	P	0.008057	68.7	P	0.00293	46.5	P	0.00415	27.5	P	0.037598	MG1655_hrsA_b0731 DB_XREF=PID:g1786951 SEG=NC_000913:+765207,767183 LEN=1976 DEF=protein modification enzyme, induction of ompC
1762430_at	118.6	P	0.000244	73.1	P	0.000244	99.7	P	0.001953	110.8	P	0.000244	72.7	P	0.000244	66.7	P	0.000244	MG1655_ybgG_b0732 DB_XREF=PID:g1786952 SEG=NC_000913:+767201,769834 LEN=2633 DEF=putative sugar hydrolase
1763881_s_at	4279.3	P	0.000244	1437.3	P	0.000244	1333.9	P	0.000244	1843.7	P	0.000244	1388.1	P	0.000244	1465.4	P	0.000244	MG1655_cydA_b0733 DB_XREF=PID:g1786953 SEG=NC_000913:+770678,772249 LEN=1571 DEF=cytochrome d terminal oxidase, polypeptide subunit I
1765588_s_at	3820	P	0.000244	1433.5	P	0.000244	1232	P	0.000732	1737	P	0.000244	1445.2	P	0.000732	1625.7	P	0.000732	MG1655_cydB_b0734 DB_XREF=PID:g1786954 SEG=NC_000913:+772265,773404 LEN=1139 DEF=cytochrome d terminal oxidase polypeptide subunit II
1768345_s_at	2165.2	P	0.000244	494.4	P	0.000244	730.8	P	0.000732	1186.3	P	0.000244	737.7	P	0.000244	754	P	0.000244	MG1655_ybgE_b0735 DB_XREF=PID:g1786956 SEG=NC_000913:+773532,773825 LEN=293 DEF=orf, hypothetical protein
1761641_s_at	3205.2	P	0.000732	2770.3	P	0.001953	2424.4	P	0.00415	2078	P	0.00293	1534.7	P	0.008057	1967	P	0.008057	MG1655_ybgC_b0736 DB_XREF=PID:g1786957 SEG=NC_000913:+773975,774379 LEN=404 DEF=orf, hypothetical protein
1759748_s_at	2117.4	P	0.000244	1310.8	P	0.000244	1249.5	P	0.000732	918.6	P	0.000244	739.1	P	0.000732	674.7	P	0.000732	MG1655_tolQ_b0737 DB_XREF=PID:g1786958 SEG=NC_000913:+774376,775068 LEN=692 DEF=inner membrane protein, membrane-spanning, maintains integrity of cell envelope; tolerance to group A colicins
1767600_s_at	1811.4	P	0.000244	1040.9	P	0.000244	833	P	0.000244	625	P	0.000244	442.4	P	0.000244	508.6	P	0.000244	MG1655_tolR_b0738 DB_XREF=PID:g1786959 SEG=NC_000913:+775072,775500 LEN=428 DEF=putative inner membrane protein, involved in the tonB-independent uptake of group A colicins
1766262_s_at	3068.5	P	0.000244	1886.8	P	0.000244	1610.4	P	0.000244	1256.2	P	0.000244	1268.7	P	0.000244	1011.8	P	0.000244	MG1655_tolA_b0739 DB_XREF=PID:g1786960 SEG=NC_000913:+775565,776830 LEN=1265 DEF=membrane spanning protein, required for outer membrane integrity
1762132_s_at	3566.7	P	0.000244	3093.4	P	0.000244	2801.5	P	0.000244	3091.1	P	0.000244	2504.3	P	0.000244	2982.2	P	0.000244	MG1655_tolB_b0740 DB_XREF=PID:g1786961 SEG=NC_000913:+776963,778255 LEN=1292 DEF=periplasmic protein involved in the tonb-independent uptake of group A colicins
1762757_s_at	4257.3	P	0.000244	6044	P	0.000244	4088.2	P	0.000244	4304.8	P	0.000244	4383.5	P	0.000244	4763	P	0.000244	MG1655_pal_b0741 DB_XREF=PID:g1786962 SEG=NC_000913:+778290,778811 LEN=521 DEF=peptidoglycan-associated lipoprotein
1762710_s_at	4083.8	P	0.000244	3957.6	P	0.000244	3071.7	P	0.000244	3116.2	P	0.000244	3148.2	P	0.000244	3083	P	0.000244	MG1655_ybgF_b0742 DB_XREF=PID:g1786963 SEG=NC_000913:+778821,779612 LEN=791 DEF=orf, hypothetical protein
1768676_s_at	1925.3	P	0.000244	150.2	P	0.000244	216.5	P	0.000732	417.1	P	0.000244	343.6	P	0.000244	340.9	P	0.000244	MG1655_nadA_b0750 DB_XREF=PID:g1786964 SEG=NC_000913:+781308,782351 LEN=1043 DEF=quinolinate synthetase, A protein
1761748_s_at	1030	P	0.000244	96.9	P	0.000244	149.3	P	0.000732	449.2	P	0.000244	431.2	P	0.000244	406.3	P	0.000244	MG1655_pnuC_b0751 DB_XREF=PID:g1786965 SEG=NC_000913:+782389,783108 LEN=719 DEF=required for NMN transport
1763217_s_at	171.7	P	0.000244	82.2	P	0.010742	78	P	0.030273	113.7	P	0.000244	100.9	P	0.00293	88.4	P	0.018555	CFT073_c0827 DB_XREF=26246717 SEG=NC_004431:-806003,806401 LEN=398 DEF=Putative conserved protein
1763864_s_at	58.6	P	0.018555	74.6	P	0.010742	62.7	P	0.023926	105.2	P	0.00293	88.8	P	0.008057	74	P	0.008057	MG1655_b0753 DB_XREF=PID:g1786968 SEG=NC_000913:-784160,784540 LEN=380 DEF=putative homeobox protein
1761952_at	2726.3	P	0.000244	1549.1	P	0.000244	1824	P	0.000244	4931.2	P	0.000244	3911	P	0.000244	3932.1	P	0.000244	MG1655_aroG_b0754 DB_XREF=PID:g1786969 SEG=NC_000913:+784856,785908 LEN=1052 DEF=3-deoxy-D-arabinoheptulosonate-7-phosphate synthase (DAHP synthetase, phenylalanine repressible)
1759801_s_at	2896	P	0.000244	7037.5	P	0.000244	5503.1	P	0.000244	4500.8	P	0.000244	5272.8	P	0.000244	6335.5	P	0.000244	MG1655_gpmA_b0755 DB_XREF=PID:g1786970 SEG=NC_000913:-786066,786818 LEN=752 DEF=phosphoglyceromutase 1
1768738_s_at	869.9	P	0.001221	890.7	P	0.001953	797.3	P	0.01416	689.3	P	0.00293	1054.3	P	0.00415	1183.4	P	0.001221	MG1655_galM_b0756 DB_XREF=PID:g1786971 SEG=NC_000913:-787020,788060 LEN=1040 DEF=galactose-1-epimerase (mutarotase)
1766576_s_at	388.2	P	0.000244	490.8	P	0.000244	506.4	P	0.000244	514.5	P	0.000244	1179.8	P	0.000244	1382.1	P	0.000244	MG1655_galK_b0757 DB_XREF=PID:g1786972 SEG=NC_000913:-788054,789202 LEN=1148 DEF=galactokinase
1760803_s_at	233.5	P	0.000244	280	P	0.000244	254.6	P	0.000244	300.3	P	0.000244	435.3	P	0.000244	422.3	P	0.000244	MG1655_galT_b0758 DB_XREF=PID:g1786973 SEG=NC_000913:-789206,790252 LEN=1046 DEF=galactose-1-phosphate uridylyltransferase
1761962_s_at	392.9	P	0.000244	565.7	P	0.000244	383.4	P	0.000244	478.2	P	0.000244	731.9	P	0.000244	720.6	P	0.000244	MG1655_galE_b0759 DB_XREF=PID:g1786974 SEG=NC_000913:-790262,791278 LEN=1016 DEF=UDP-galactose-4-epimerase
1762988_at	76.7	P	0.000244	83.8	P	0.000244	159.4	P	0.000244	225.4	P	0.000244	202.8	P	0.000244	148.5	P	0.000244	MG1655_modF_b0760 DB_XREF=PID:g1786975 SEG=NC_000913:-791539,793011 LEN=1472 DEF=ATP-binding component of molybdate transport system
1762615_s_at	332.5	P	0.000244	273.7	P	0.000244	280.9	P	0.000244	285.1	P	0.000244	304.2	P	0.000732	239.6	P	0.000244	MG1655_modE_b0761 DB_XREF=PID:g1786976 SEG=NC_000913:-793079,793867 LEN=788 DEF=molybdate uptake regulatory protein
1767002_s_at	1500.5	P	0.000732	2048.5	P	0.000244	2367.7	P	0.000244	1200.1	P	0.000732	901.6	P	0.000732	979.8	P	0.000732	MG1655_b0762 DB_XREF=PID:g1786977 SEG=NC_000913:+793996,794145 LEN=149 DEF=orf, hypothetical protein
1764243_s_at	175.2	P	0.000244	351.2	P	0.000244	491.4	P	0.000244	303.1	P	0.000244	1512.7	P	0.000244	1805.1	P	0.000244	CFT073_modA_c0840 DB_XREF=26246730 SEG=NC_004431:+816667,817440 LEN=773 DEF=Molybdate-binding periplasmic protein precursor
1763211_s_at	279.2	P	0.00293	320.8	P	0.00293	537.2	P	0.00293	349.5	P	0.001953	604.6	P	0.001221	550.5	P	0.001221	CFT073_modB_c0841 DB_XREF=26246731 SEG=NC_004431:+817440,818129 LEN=689 DEF=Molybdenum transport system permease protein modB
1763322_s_at	196.1	P	0.000732	166.1	P	0.00415	151.9	P	0.00293	176.4	P	0.00415	298.2	P	0.00293	276.8	P	0.00293	MG1655_modC_b0765 DB_XREF=PID:g1786981 SEG=NC_000913:+795777,796835 LEN=1058 DEF=ATP-binding component of molybdate transport
1768949_s_at	303.5	P	0.001221	293	P	0.001221	373.2	P	0.001953	279.4	P	0.001221	271.5	P	0.00415	250.6	P	0.001953	MG1655_ybhA_b0766 DB_XREF=PID:g1786982 SEG=NC_000913:-796836,797654 LEN=818 DEF=putative phosphatase
1765159_s_at	94.9	P	0.000732	186	P	0.000732	186.7	P	0.000732	131.2	P	0.000732	200.6	P	0.000732	198.5	P	0.000732	MG1655_ybhE_b0767 DB_XREF=PID:g1786983 SEG=NC_000913:+797809,798804 LEN=995 DEF=putative isomerase
1760886_s_at	24.1	P	0.01416	55.8	P	0.001953	64.1	P	0.005859	94.3	P	0.000732	71.9	P	0.010742	49.7	P	0.01416	MG1655_ybhD_b0768 DB_XREF=PID:g1786984 SEG=NC_000913:-798845,799861 LEN=1016 DEF=putative transcriptional regulator LYSR-type
1767312_s_at	17.9	A	0.246094	31	A	0.149658	44.2	A	0.067627	62.3	M	0.056152	49.2	A	0.129639	35.2	A	0.149658	MG1655_ybhH_b0769 DB_XREF=PID:g1786985 SEG=NC_000913:+799982,801034 LEN=1052 DEF=orf, hypothetical protein
1760883_s_at	17.1	A	0.246094	11.7	A	0.432373	25.7	A	0.334473	50.4	A	0.19458	6.2	A	0.456787	9.2	A	0.466064	MG1655_ybhI_b0770 DB_XREF=PID:g1786986 SEG=NC_000913:+801110,802543 LEN=1433 DEF=putative membrane pump protein
1768505_at	73.5	P	0.001953	71.3	P	0.018555	98.9	P	0.018555	94.8	P	0.001953	93.6	P	0.018555	64.3	M	0.056152	MG1655_ybhJ_b0771 DB_XREF=PID:g1786987 SEG=NC_000913:+802702,804987 LEN=2285 DEF=putative enzyme
1764237_s_at	602.6	P	0.000244	347.8	P	0.000244	390.7	P	0.000244	281.4	P	0.000244	241	P	0.000244	210.7	P	0.000732	MG1655_ybhC_b0772 DB_XREF=PID:g1786989 SEG=NC_000913:-805221,806504 LEN=1283 DEF=putative pectinesterase
1761453_s_at	247.7	P	0.000244	296.4	P	0.000244	378.4	P	0.000244	338	P	0.000244	391.6	P	0.000244	359.2	P	0.000244	MG1655_ybhB_b0773 DB_XREF=PID:g1786990 SEG=NC_000913:-806656,807132 LEN=476 DEF=orf, hypothetical protein
1760048_s_at	74.4	P	0.023926	67.9	P	0.023926	60.7	P	0.046143	200.6	P	0.023926	118.7	P	0.037598	92.3	P	0.023926	MG1655_bioA_b0774 DB_XREF=PID:g1786991 SEG=NC_000913:-807191,808480 LEN=1289 DEF=7,8-diaminopelargonic acid synthetase
1766986_s_at	46	P	0.000732	18	A	0.19458	31.9	A	0.111572	233.3	P	0.000244	180.2	P	0.000732	140.8	P	0.000244	MG1655_bioF_b0776 DB_XREF=PID:g1786993 SEG=NC_000913:+809604,810758 LEN=1154 DEF=8-amino-7-oxononanoate synthase
1762721_s_at	54.8	P	0.000244	40.3	P	0.008057	43.5	P	0.037598	975.8	P	0.000244	811	P	0.000244	588.7	P	0.000244	MG1655_bioD_b0778 DB_XREF=PID:g1786995 SEG=NC_000913:+811493,812170 LEN=677 DEF=dethiobiotin synthetase
1763948_s_at	974.8	P	0.000244	1121.9	P	0.000244	835.9	P	0.000244	844.5	P	0.000244	784.5	P	0.000244	678.5	P	0.000244	MG1655_uvrB_b0779 DB_XREF=PID:g1786996 SEG=NC_000913:+812749,814770 LEN=2021 DEF=DNA repair; excision nuclease subunit B
1767485_at	580.2	P	0.000732	558.5	P	0.000732	545.1	P	0.00293	322.4	P	0.001221	307.5	P	0.00293	292.3	P	0.00415	MG1655_ybhK_b0780 DB_XREF=PID:g1786997 SEG=NC_000913:-814962,815870 LEN=908 DEF=putative structural protein
1765186_s_at	930.8	P	0.000244	539.7	P	0.000244	583.7	P	0.000244	729.4	P	0.000244	469.3	P	0.000244	492.5	P	0.000244	MG1655_moaA_b0781 DB_XREF=PID:g1786999 SEG=NC_000913:+816267,817256 LEN=989 DEF=molybdopterin biosynthesis, protein A
1765982_s_at	556.6	P	0.000244	474.4	P	0.000244	308.4	P	0.000244	585.8	P	0.000244	495.3	P	0.000244	543.2	P	0.000244	MG1655_moaB_b0782 DB_XREF=PID:g1787000 SEG=NC_000913:+817278,817790 LEN=512 DEF=molybdopterin biosynthesis, protein B
1766462_s_at	351.9	P	0.010742	369.7	P	0.01416	383.4	P	0.018555	308.8	P	0.01416	256.4	P	0.030273	299.3	P	0.023926	MG1655_moaC_b0783 DB_XREF=PID:g1787001 SEG=NC_000913:+817793,818278 LEN=485 DEF=molybdopterin biosynthesis, protein C
1768589_s_at	606.6	P	0.000244	760.6	P	0.000244	690.8	P	0.000244	914.9	P	0.000244	1012.5	P	0.000244	1090.3	P	0.000244	MG1655_moaD_b0784 DB_XREF=PID:g1787002 SEG=NC_000913:+818271,818516 LEN=245 DEF=molybdopterin biosynthesis
1763938_s_at	401.9	P	0.001221	448.7	P	0.00293	386.9	P	0.005859	373.3	P	0.001221	362.6	P	0.001953	370	P	0.00293	MG1655_moaE_b0785 DB_XREF=PID:g1787003 SEG=NC_000913:+818518,818970 LEN=452 DEF=molybdopterin converting factor, subunit 2
1764111_s_at	696.7	P	0.000244	975.7	P	0.000244	1157.3	P	0.000244	1283	P	0.000244	1717.4	P	0.000244	1924	P	0.000244	MG1655_ybhL_b0786 DB_XREF=PID:g1787004 SEG=NC_000913:+819107,819811 LEN=704 DEF=orf, hypothetical protein
1764422_s_at	71.8	P	0.000244	77.1	P	0.000244	163.1	P	0.000244	143.7	P	0.000244	96	P	0.000244	51.9	P	0.000244	MG1655_ybhM_b0787 DB_XREF=PID:g1787005 SEG=NC_000913:+820016,820729 LEN=713 DEF=orf, hypothetical protein
1762106_s_at	57.7	P	0.000732	85.3	P	0.000244	116.3	P	0.000244	199.1	P	0.000244	107.5	P	0.001953	111.8	P	0.001953	MG1655_ybhN_b0788 DB_XREF=PID:g1787006 SEG=NC_000913:-820765,821721 LEN=956 DEF=orf, hypothetical protein
1759744_s_at	68	P	0.000732	74.2	P	0.000244	85.7	P	0.000244	113.6	P	0.000244	68.3	P	0.000244	91.7	P	0.000244	CFT073_ybhO_c0872 DB_XREF=26246762 SEG=NC_004431:-845120,846361 LEN=1241 DEF=Hypothetical protein ybhO
1767041_s_at	69.3	P	0.000244	69.3	P	0.000244	100.8	P	0.000244	176.3	P	0.000732	121.8	P	0.000732	85.8	P	0.000244	MG1655_ybhP_b0790 DB_XREF=PID:g1787008 SEG=NC_000913:-822959,823720 LEN=761 DEF=orf, hypothetical protein
1761194_s_at	274.1	P	0.000244	428	P	0.000244	406.5	P	0.000244	712.4	P	0.000244	727.4	P	0.000244	776.7	P	0.000244	MG1655_ybhQ_b0791 DB_XREF=PID:g1787009 SEG=NC_000913:+823853,824263 LEN=410 DEF=orf, hypothetical protein
1763047_s_at	67.1	P	0.000244	115.1	P	0.000244	98.6	P	0.000244	120.1	P	0.000244	137.8	P	0.000244	117.4	P	0.000244	MG1655_ybhR_b0792 DB_XREF=PID:g1787010 SEG=NC_000913:-824225,825331 LEN=1106 DEF=orf, hypothetical protein
1762821_s_at	47.5	P	0.00415	59.6	P	0.010742	92.1	P	0.010742	83.1	P	0.001221	68.4	P	0.005859	72.2	P	0.001953	MG1655_ybhS_b0793 DB_XREF=PID:g1787011 SEG=NC_000913:-825342,826475 LEN=1133 DEF=orf, hypothetical protein
1760604_s_at	54.1	P	0.000244	86.2	P	0.000244	101.9	P	0.000244	79.2	P	0.000244	130.8	P	0.000244	101.4	P	0.000244	CFT073_ybhF_c0877 DB_XREF=26246767 SEG=NC_004431:-849867,851618 LEN=1751 DEF=Hypothetical ABC transporter ATP-binding protein ybhF
1762597_s_at	110.6	P	0.001953	232.6	P	0.00293	194.1	P	0.000244	150.4	P	0.000244	236	P	0.000732	293.8	P	0.001953	MG1655_b0795 DB_XREF=PID:g1787013 SEG=NC_000913:-828197,829195 LEN=998 DEF=putative membrane protein
1764321_s_at	106.7	P	0.001221	176.2	P	0.000244	230.2	P	0.000244	244.5	P	0.005859	179.6	P	0.001953	187.7	P	0.001953	MG1655_ybiH_b0796 DB_XREF=PID:g1787014 SEG=NC_000913:-829195,829878 LEN=683 DEF=putative transcriptional regulator
1762468_s_at	2650.4	P	0.000732	1280.9	P	0.001221	956.7	P	0.001221	708	P	0.001953	420.4	P	0.005859	375.9	P	0.00293	MG1655_rhlE_b0797 DB_XREF=PID:g1787016 SEG=NC_000913:+830095,831459 LEN=1364 DEF=putative ATP-dependent RNA helicase
1768254_at	121.5	P	0.000732	110.5	P	0.000732	128.2	P	0.000732	277.4	P	0.000244	157.7	P	0.000244	167.8	P	0.000244	MG1655_ybiA_b0798 DB_XREF=PID:g1787017 SEG=NC_000913:-831691,832173 LEN=482 DEF=orf, hypothetical protein
1760213_s_at	518.2	P	0.000244	197.9	P	0.000244	247.9	P	0.000244	231.3	P	0.000244	194.7	P	0.000244	157.5	P	0.000244	MG1655_dinG_b0799 DB_XREF=PID:g1787018 SEG=NC_000913:+832293,834443 LEN=2150 DEF=probably ATP-dependent helicase
1763550_s_at	443.9	P	0.001953	276.7	P	0.001953	261.8	P	0.00293	373.5	P	0.00293	414.8	P	0.001953	456.4	P	0.001953	MG1655_ybiB_b0800 DB_XREF=PID:g1787019 SEG=NC_000913:+834471,835433 LEN=962 DEF=putative enzyme
1760839_s_at	320.9	P	0.000244	259.6	P	0.000244	325.2	P	0.000244	552.3	P	0.000244	1096.9	P	0.000244	1040.3	P	0.000244	MG1655_ybiC_b0801 DB_XREF=PID:g1787020 SEG=NC_000913:+835574,836659 LEN=1085 DEF=putative dehydrogenase
1762061_s_at	1591.4	P	0.000244	1767.6	P	0.000244	1455.9	P	0.000732	660.8	P	0.000732	520.5	P	0.00415	509.3	P	0.001953	MG1655_ybiJ_b0802 DB_XREF=PID:g1787021 SEG=NC_000913:-836888,837148 LEN=260 DEF=orf, hypothetical protein
1762234_s_at	48.2	P	0.00293	36.5	P	0.00293	61.2	P	0.00415	53.6	P	0.001953	87.8	P	0.00293	64.7	P	0.001221	MG1655_ybiI_b0803 DB_XREF=PID:g1787022 SEG=NC_000913:-837413,837679 LEN=266 DEF=orf, hypothetical protein
1765458_s_at	66.6	P	0.000244	101.2	P	0.000244	103	P	0.001953	96.9	P	0.000244	165.4	P	0.000244	124.7	P	0.000244	MG1655_ybiX_b0804 DB_XREF=PID:g1787023 SEG=NC_000913:-837753,838466 LEN=713 DEF=putative enzyme
1763150_s_at	35.5	P	0.001953	83.7	P	0.000244	57.7	P	0.000244	46.9	P	0.000732	169.5	P	0.000244	150.9	P	0.000244	MG1655_b0805 DB_XREF=PID:g1787024 SEG=NC_000913:-838472,840754 LEN=2282 DEF=putative outer membrane receptor for iron transport
1768822_s_at	80	P	0.000244	81.6	P	0.000732	76.7	P	0.00293	143	P	0.000244	101	P	0.000244	62.2	P	0.001221	MG1655_ybiM_b0806 DB_XREF=PID:g1787026 SEG=NC_000913:-841019,841423 LEN=404 DEF=orf, hypothetical protein
1765183_s_at	379.3	P	0.000244	197.5	P	0.000732	196.8	P	0.000244	316.7	P	0.000244	215.1	P	0.000244	159.4	P	0.000244	MG1655_ybiN_b0807 DB_XREF=PID:g1787027 SEG=NC_000913:+841474,842481 LEN=1007 DEF=orf, hypothetical protein
1763477_at	119.3	P	0.00293	51.7	P	0.008057	102.7	P	0.000244	170.2	P	0.001953	123.9	P	0.000244	69.2	P	0.00293	MG1655_ybiO_b0808 DB_XREF=PID:g1787028 SEG=NC_000913:-842478,844838 LEN=2360 DEF=putative transport protein
1759579_s_at	429.7	P	0.000244	1109.5	P	0.000244	1178.3	P	0.000244	739.9	P	0.000244	1118.1	P	0.000244	1158.7	P	0.000244	MG1655_glnQ_b0809 DB_XREF=PID:g1787029 SEG=NC_000913:-844964,845686 LEN=722 DEF=ATP-binding component of glutamine high-affinity transport system
1766676_s_at	364.9	P	0.000732	936.6	P	0.000732	1059.6	P	0.000732	815.7	P	0.000732	901.1	P	0.000244	1038.7	P	0.000244	MG1655_glnP_b0810 DB_XREF=PID:g1787030 SEG=NC_000913:-845683,846342 LEN=659 DEF=glutamine high-affinity transport system; membrane component
1766180_s_at	803	P	0.000244	2603.6	P	0.000244	2254.3	P	0.000244	2586.6	P	0.000244	3748.3	P	0.000244	4414	P	0.000244	MG1655_glnH_b0811 DB_XREF=PID:g1787031 SEG=NC_000913:-846481,847227 LEN=746 DEF=periplasmic glutamine-binding protein; permease
1759309_s_at	601.2	P	0.000732	1637.1	P	0.000244	1054.5	P	0.000732	1338.3	P	0.000732	714	P	0.001221	756.6	P	0.001953	MG1655_dps_b0812 DB_XREF=PID:g1787032 SEG=NC_000913:-847631,848134 LEN=503 DEF=global regulator, starvation conditions
1767445_s_at	186.4	P	0.00415	111	P	0.00415	170.8	P	0.005859	98.2	P	0.01416	74.2	P	0.046143	64.1	A	0.149658	MG1655_ybiF_b0813 DB_XREF=PID:g1787033 SEG=NC_000913:-848433,849320 LEN=887 DEF=putative transmembrane subunit
1767825_s_at	4189.4	P	0.000244	6049.7	P	0.000244	5015.6	P	0.000244	2627.5	P	0.000244	2109.8	P	0.000244	2489.4	P	0.000244	MG1655_ompX_b0814 DB_XREF=PID:g1787034 SEG=NC_000913:+849673,850188 LEN=515 DEF=outer membrane protein X
1764594_s_at	556	P	0.000244	214.4	P	0.000244	217.8	P	0.000244	235.7	P	0.000732	103.3	P	0.008057	89.9	P	0.018555	MG1655_ybiP_b0815 DB_XREF=PID:g1787035 SEG=NC_000913:-850237,851820 LEN=1583 DEF=putative enzyme
1765355_at	50.4	P	0.000244	44.2	P	0.000244	50.7	P	0.000244	58.2	P	0.000244	40.6	P	0.000732	29.8	P	0.00415	MG1655_b0816 DB_XREF=PID:g1787037 SEG=NC_000913:+851894,852163 LEN=269 DEF=orf, hypothetical protein
1762278_at	1697.6	P	0.000244	2517.9	P	0.000244	3576.5	P	0.000244	4405.7	P	0.000244	5191.9	P	0.000244	5698.2	P	0.000244	MG1655_rybA_b4416 SEG=NC_000913:-852175,852263 LEN=88
1761297_s_at	675.9	P	0.000244	711.9	P	0.000244	759.6	P	0.000244	767	P	0.000244	625.4	P	0.000244	558.3	P	0.000244	MG1655_b0817 DB_XREF=PID:g1787038 SEG=NC_000913:+852406,852873 LEN=467 DEF=putative toxin
1761832_s_at	315.6	P	0.001221	252.3	P	0.005859	362.5	P	0.030273	252.8	P	0.005859	187.8	P	0.018555	150.4	P	0.010742	CFT073_ybiR_c0904 DB_XREF=26246794 SEG=NC_004431:+876001,877119 LEN=1118 DEF=Hypothetical protein ybiR
1767751_s_at	1578.2	P	0.000244	934.7	P	0.000244	699.5	P	0.000244	617.6	P	0.000244	633.8	P	0.000244	606.6	P	0.000244	MG1655_ybiS_b0819 DB_XREF=PID:g1787040 SEG=NC_000913:-854047,854967 LEN=920 DEF=orf, hypothetical protein
1760186_s_at	1125.4	P	0.001953	432.7	P	0.018555	460.5	A	0.067627	533.8	P	0.010742	549.8	P	0.023926	533.1	P	0.010742	MG1655_ybiT_b0820 DB_XREF=PID:g1787041 SEG=NC_000913:+855186,856778 LEN=1592 DEF=putative ATP-binding component of a transport system
1763241_s_at	205.9	P	0.000244	149.8	P	0.000244	199	P	0.000244	57.2	P	0.000244	87.8	P	0.000244	66.5	P	0.000244	MG1655_ybiU_b0821 DB_XREF=PID:g1787042 SEG=NC_000913:-857019,858284 LEN=1265 DEF=orf, hypothetical protein
1765016_s_at	314.9	P	0.000244	283.5	P	0.000732	426.3	P	0.000244	147.5	P	0.001221	186.3	P	0.001221	192.9	P	0.008057	MG1655_b0822 DB_XREF=PID:g1787043 SEG=NC_000913:-858436,859251 LEN=815 DEF=orf, hypothetical protein
1760899_s_at	37.1	A	0.149658	28.5	A	0.27417	37.6	A	0.149658	60	P	0.030273	32.9	A	0.219482	57.8	A	0.246094	EDL933_Z1046 DB_XREF=GI:12513826 SEG=NC_002655:-987941,988495 LEN=554 DEF=Pyruvate-formate lyase
1762955_s_at	51.4	A	0.111572	46.2	A	0.129639	78.5	A	0.067627	92.2	P	0.030273	95.1	P	0.023926	48	A	0.095215	MG1655_ybiY_b0824 DB_XREF=PID:g1787045 SEG=NC_000913:-861835,862761 LEN=926 DEF=putative pyruvate formate-lyase activating enzyme 2
1759408_s_at	79.7	P	0.000732	78.8	P	0.000244	114.9	P	0.000732	144.3	P	0.000244	107.5	P	0.000732	89.5	P	0.000732	MG1655_b0825 DB_XREF=PID:g1787046 SEG=NC_000913:+862793,863527 LEN=734 DEF=putative transaldolase
1761151_at	79.5	P	0.000244	83.2	P	0.000244	110.5	P	0.000244	114	P	0.000732	75.9	P	0.000732	90.2	P	0.001953	MG1655_moeB_b0826 DB_XREF=PID:g1787048 SEG=NC_000913:-863603,864352 LEN=749 DEF=molybdopterin biosynthesis
1762714_s_at	476.3	P	0.001953	323.5	P	0.010742	336.6	P	0.00415	333.1	P	0.01416	299.6	P	0.01416	344.4	P	0.01416	MG1655_moeA_b0827 DB_XREF=PID:g1787049 SEG=NC_000913:-864352,865587 LEN=1235 DEF=molybdopterin biosynthesis
1766252_s_at	426.1	P	0.000244	267.5	P	0.000244	270.9	P	0.000244	718.6	P	0.000244	655.5	P	0.000244	657.9	P	0.000244	MG1655_ybiK_b0828 DB_XREF=PID:g1787050 SEG=NC_000913:+865791,866756 LEN=965 DEF=putative asparaginase
1769028_s_at	218	P	0.000732	127.8	P	0.000732	180.8	P	0.000732	628.5	P	0.000244	542.4	P	0.000732	535.1	P	0.000732	MG1655_b0829 DB_XREF=PID:g1787051 SEG=NC_000913:+866776,868614 LEN=1838 DEF=putative ATP-binding component of a transport system
1763081_s_at	175.4	P	0.000244	121	P	0.000732	182.5	P	0.000732	1290.5	P	0.000244	798.3	P	0.000244	900.7	P	0.000244	MG1655_b0830 DB_XREF=PID:g1787052 SEG=NC_000913:+868634,870172 LEN=1538 DEF=putative transport protein
1760978_s_at	102.1	P	0.000244	99.7	P	0.000732	115.2	P	0.00415	833	P	0.000244	357.5	P	0.000244	379.8	P	0.000244	MG1655_b0831 DB_XREF=PID:g1787053 SEG=NC_000913:+870190,871110 LEN=920 DEF=putative transport system permease protein
1759598_s_at	158.6	P	0.000732	159.3	P	0.001953	218.6	P	0.001221	1369.2	P	0.000244	645.2	P	0.000244	682.5	P	0.000244	MG1655_b0832 DB_XREF=PID:g1787054 SEG=NC_000913:+871113,872024 LEN=911 DEF=putative transport system permease protein
1760950_s_at	105.9	P	0.000244	118.7	P	0.001953	111.2	P	0.000732	237.4	P	0.000244	85.2	P	0.000244	80.1	P	0.000732	MG1655_b0833 DB_XREF=PID:g1787055 SEG=NC_000913:+872202,874550 LEN=2348 DEF=orf, hypothetical protein
1760159_s_at	95.5	P	0.001953	123	P	0.000244	188.3	P	0.000732	218.2	P	0.000244	88.2	P	0.000244	56.3	P	0.000244	MG1655_b0834 DB_XREF=PID:g1787056 SEG=NC_000913:+874558,875886 LEN=1328 DEF=orf, hypothetical protein
1759088_s_at	799.6	P	0.000244	259.8	P	0.000732	209.4	P	0.001953	449.5	P	0.000244	270.8	P	0.00293	239.9	P	0.001221	MG1655_yliG_b0835 DB_XREF=PID:g1787057 SEG=NC_000913:-875933,877258 LEN=1325 DEF=orf, hypothetical protein
1765552_s_at	760.1	P	0.000244	494.9	P	0.000244	474.4	P	0.000732	1672.1	P	0.000244	1366.7	P	0.000244	1640.2	P	0.000244	MG1655_b0836 DB_XREF=PID:g1787059 SEG=NC_000913:+877471,877854 LEN=383 DEF=putative receptor
1763928_s_at	112	P	0.00415	61.6	P	0.037598	82.9	P	0.037598	163.5	P	0.008057	118.1	P	0.018555	110.4	P	0.030273	MG1655_yliI_b0837 DB_XREF=PID:g1787060 SEG=NC_000913:+877965,879080 LEN=1115 DEF=putative dehydrogenase
1765261_s_at	535.1	P	0.000244	380.5	P	0.000732	419.6	P	0.00293	636.4	P	0.000244	577.2	P	0.000732	669.6	P	0.000732	MG1655_yliJ_b0838 DB_XREF=PID:g1787061 SEG=NC_000913:-879077,879709 LEN=632 DEF=putative transferase
1763054_s_at	335.4	P	0.000732	142.8	P	0.008057	186.9	P	0.00293	282.6	P	0.000244	336.6	P	0.00293	384.4	P	0.001953	MG1655_dacC_b0839 DB_XREF=PID:g1787062 SEG=NC_000913:+879950,881152 LEN=1202 DEF=D-alanyl-D-alanine carboxypeptidase; penicillin-binding protein 6
1768796_s_at	353.2	P	0.000244	324.5	P	0.000244	449.9	P	0.000244	232.6	P	0.000244	314	P	0.000244	306.3	P	0.000244	MG1655_deoR_b0840 DB_XREF=PID:g1787063 SEG=NC_000913:-881199,881957 LEN=758 DEF=transcriptional repressor for deo operon, tsx, nupG
1764432_s_at	193.8	P	0.001221	102.2	P	0.010742	147.1	P	0.00293	241	P	0.001221	184.5	P	0.001221	220.8	P	0.000732	MG1655_ybjG_b0841 DB_XREF=PID:g1787064 SEG=NC_000913:-882015,882611 LEN=596 DEF=orf, hypothetical protein
1769159_s_at	122.7	P	0.000732	67.5	P	0.001953	148	P	0.000732	130.7	P	0.000732	61	P	0.00293	61.4	P	0.005859	MG1655_cmr_b0842 DB_XREF=PID:g1787065 SEG=NC_000913:+882896,884128 LEN=1232 DEF=proton motive force efflux pump
1764820_s_at	117.9	P	0.000732	123.2	P	0.000732	195.8	P	0.001221	153.8	P	0.000732	132.5	P	0.001221	109.2	P	0.001221	MG1655_ybjH_b0843 DB_XREF=PID:g1787066 SEG=NC_000913:-884169,884453 LEN=284 DEF=orf, hypothetical protein
1763994_s_at	178.9	P	0.000244	191	P	0.000244	201.8	P	0.001221	227.5	P	0.000244	215.6	P	0.000244	266.7	P	0.001953	MG1655_b0844 DB_XREF=PID:g1787067 SEG=NC_000913:-884539,885327 LEN=788 DEF=orf, hypothetical protein
1767572_s_at	227.9	P	0.000732	159.9	P	0.000732	166.7	P	0.000732	238.8	P	0.000732	198.4	P	0.000732	201.5	P	0.000732	MG1655_b0845 DB_XREF=PID:g1787068 SEG=NC_000913:-885354,886562 LEN=1208 DEF=putative DEOR-type transcriptional regulator
1766302_s_at	138.8	P	0.000732	130.6	P	0.000732	154.3	P	0.000732	201.7	P	0.000244	208.6	P	0.000732	199.5	P	0.000244	MG1655_b0846 DB_XREF=PID:g1787069 SEG=NC_000913:+886646,887182 LEN=536 DEF=putative DEOR-type transcriptional regulator
1762154_at	480.8	P	0.000244	524.4	P	0.000244	574.6	P	0.000244	511.7	P	0.000244	474.5	P	0.000244	303.6	P	0.000244	MG1655_rybB_b4417 SEG=NC_000913:-887199,887277 LEN=78
1767021_s_at	825.5	P	0.000244	165.8	P	0.000244	248.4	P	0.000244	278.7	P	0.000244	146.6	P	0.000244	109.7	P	0.000244	MG1655_b0847 DB_XREF=PID:g1787071 SEG=NC_000913:-887357,889042 LEN=1685 DEF=putative transport protein
1768117_s_at	540.8	P	0.000244	88.6	P	0.001953	168.9	P	0.00415	122	P	0.005859	69.7	P	0.018555	61.3	P	0.018555	MG1655_ybjM_b0848 DB_XREF=PID:g1787072 SEG=NC_000913:+889312,889689 LEN=377 DEF=orf, hypothetical protein
1766075_s_at	519.7	P	0.000244	955.6	P	0.000244	1197.7	P	0.000244	430	P	0.001953	313.7	P	0.000244	225.6	P	0.000732	MG1655_grxA_b0849 DB_XREF=PID:g1787073 SEG=NC_000913:-889719,889976 LEN=257 DEF=glutaredoxin1 redox coenzyme for glutathione-dependent ribonucleotide reductase
1767468_s_at	580.8	P	0.000244	411.2	P	0.000244	639	P	0.000244	488.4	P	0.000244	360	P	0.000244	349.5	P	0.000244	MG1655_ybjC_b0850 DB_XREF=PID:g1787074 SEG=NC_000913:+890136,890423 LEN=287 DEF=orf, hypothetical protein
1765099_s_at	271	P	0.000244	175.1	P	0.00293	165.9	P	0.005859	143.4	P	0.010742	117.4	P	0.018555	105.1	P	0.018555	MG1655_b0851 DB_XREF=PID:g1787075 SEG=NC_000913:+890407,891129 LEN=722 DEF=modulator of drug activity A
1766887_s_at	356.7	P	0.00293	235.8	P	0.008057	280.2	P	0.000732	216	P	0.00293	202.9	P	0.00415	141.4	P	0.01416	MG1655_rimK_b0852 DB_XREF=PID:g1787076 SEG=NC_000913:+891190,892092 LEN=902 DEF=ribosomal protein S6 modification protein
1761767_s_at	862.1	P	0.000244	1113.4	P	0.000244	1279.8	P	0.000244	610.7	P	0.000244	637	P	0.000244	625.7	P	0.000244	MG1655_ybjN_b0853 DB_XREF=PID:g1787077 SEG=NC_000913:+892180,892656 LEN=476 DEF=putative sensory transduction regulator
1762048_at	85.6	P	0.008057	64.1	P	0.037598	118.9	P	0.023926	295.9	P	0.000732	247.6	P	0.001221	266.8	P	0.001221	MG1655_potF_b0854 DB_XREF=PID:g1787078 SEG=NC_000913:+893007,894119 LEN=1112 DEF=periplasmic putrescine-binding protein; permease protein
1769248_at	29.7	P	0.030273	25.9	P	0.030273	39	P	0.030273	113.5	P	0.000732	87.4	P	0.00415	77.2	P	0.000732	MG1655_potG_b0855 DB_XREF=PID:g1787079 SEG=NC_000913:+894133,895347 LEN=1214 DEF=ATP-binding component of putrescine transport system
1765887_s_at	86	P	0.001953	63	P	0.008057	67.9	P	0.000244	201.5	P	0.000244	146.8	P	0.000732	163.4	P	0.001953	MG1655_potH_b0856 DB_XREF=PID:g1787080 SEG=NC_000913:+895357,896310 LEN=953 DEF=putrescine transport protein; permease
1765220_s_at	71.5	P	0.008057	54.4	A	0.095215	86.5	P	0.046143	215.2	P	0.00293	162.5	P	0.018555	142.1	P	0.023926	MG1655_potI_b0857 DB_XREF=PID:g1787081 SEG=NC_000913:+896307,897152 LEN=845 DEF=putrescine transport protein; permease
1767212_s_at	131.8	P	0.000244	107.9	P	0.000732	124.5	P	0.000244	113.9	P	0.000244	83.1	P	0.000244	79.8	P	0.000732	MG1655_ybjO_b0858 DB_XREF=PID:g1787082 SEG=NC_000913:+897212,897700 LEN=488 DEF=orf, hypothetical protein
1767646_at	362.4	P	0.000244	236.4	P	0.000244	252.2	P	0.000244	217.4	P	0.000244	130	P	0.000244	126.1	P	0.000244	MG1655_ybjF_b0859 DB_XREF=PID:g1787083 SEG=NC_000913:+897741,898868 LEN=1127 DEF=putative enzyme
1766497_s_at	1749.9	P	0.000244	173.4	P	0.000244	205.1	P	0.000244	199.7	P	0.000244	238.5	P	0.000244	266.2	P	0.000244	MG1655_artJ_b0860 DB_XREF=PID:g1787085 SEG=NC_000913:-899067,899798 LEN=731 DEF=arginine 3rd transport system periplasmic binding protein
1767309_s_at	769.1	P	0.000244	322.4	P	0.000732	347.8	P	0.000244	281.7	P	0.000732	315.9	P	0.000732	339	P	0.000732	MG1655_artM_b0861 DB_XREF=PID:g1787086 SEG=NC_000913:-900089,900757 LEN=668 DEF=arginine 3rd transport system permease protein
1759862_s_at	1743.2	P	0.000244	486.4	P	0.000244	322.4	P	0.000244	452.5	P	0.000244	552.6	P	0.000244	522.2	P	0.000244	MG1655_artQ_b0862 DB_XREF=PID:g1787087 SEG=NC_000913:-900757,901473 LEN=716 DEF=arginine 3rd transport system permease protein
1763049_s_at	1207.3	P	0.000732	308	P	0.000244	276	P	0.001221	341.1	P	0.000732	538.4	P	0.000732	424.5	P	0.000244	MG1655_artI_b0863 DB_XREF=PID:g1787088 SEG=NC_000913:-901480,902211 LEN=731 DEF=arginine 3rd transport system periplasmic binding protein
1762904_s_at	1870.8	P	0.000244	501.1	P	0.000732	443.2	P	0.000732	300.5	P	0.00415	374.1	P	0.005859	335.7	P	0.005859	MG1655_artP_b0864 DB_XREF=PID:g1787089 SEG=NC_000913:-902229,902957 LEN=728 DEF=ATP-binding component of 3rd arginine transport system
1764790_at	145.6	P	0.000732	288.6	P	0.000732	294.8	P	0.000244	196.2	P	0.000732	275.1	P	0.000732	255.2	P	0.001221	MG1655_ybjP_b0865 DB_XREF=PID:g1787090 SEG=NC_000913:-903175,903690 LEN=515 DEF=putative lipoprotein
1764725_s_at	564.6	P	0.000244	671.3	P	0.000244	739.1	P	0.000244	509.8	P	0.000244	669.8	P	0.000244	670.4	P	0.000244	MG1655_b0866 DB_XREF=PID:g1787091 SEG=NC_000913:+903816,904139 LEN=323 DEF=orf, hypothetical protein
1763221_s_at	498	P	0.000244	438.7	P	0.000244	501	P	0.000244	387	P	0.000244	404.4	P	0.000244	420.4	P	0.000244	MG1655_b0867 DB_XREF=PID:g1787092 SEG=NC_000913:+904136,904966 LEN=830 DEF=putative regulator
1767537_s_at	313.8	P	0.000244	180.4	P	0.000244	164.4	P	0.000732	105	P	0.000732	91.5	P	0.005859	79.5	P	0.001953	EDL933_Z1102 DB_XREF=GI:12513895 SEG=NC_002655:-1038512,1039561 LEN=1049 DEF=putative nucleotide di-P-sugar epimerase or dehydratase
1768069_at	550.6	P	0.000244	480.5	P	0.000244	479.9	P	0.000244	425.6	P	0.000244	424.4	P	0.000244	459.2	P	0.000244	MG1655_ybjT_b0869 DB_XREF=PID:g1787094 SEG=NC_000913:-906075,907535 LEN=1460 DEF=orf, hypothetical protein
1764439_s_at	566.5	P	0.000732	479.1	P	0.001953	489.1	P	0.00415	500.1	P	0.000732	560.1	P	0.001221	590.8	P	0.000732	MG1655_b0870 DB_XREF=PID:g1787095 SEG=NC_000913:-907516,908517 LEN=1001 DEF=putative arylsulfatase
1762680_at	87.1	P	0.000732	59.6	P	0.001221	83.5	P	0.000244	156.2	P	0.000244	100.2	P	0.000244	61.2	P	0.000732	MG1655_poxB_b0871 DB_XREF=PID:g1787096 SEG=NC_000913:-908554,910272 LEN=1718 DEF=pyruvate oxidase
1761136_s_at	198	P	0.000244	153.4	P	0.001221	137	P	0.008057	177	P	0.000732	133.1	P	0.001221	107.4	P	0.005859	MG1655_b0872 DB_XREF=PID:g1787098 SEG=NC_000913:-910405,911373 LEN=968 DEF=hypothetical protein
1766925_s_at	309.4	P	0.000244	64.1	P	0.008057	89.3	P	0.010742	170.6	P	0.001953	100.1	P	0.010742	56	P	0.030273	MG1655_b0873 DB_XREF=PID:g1787099 SEG=NC_000913:-911385,913043 LEN=1658 DEF=putative prismane
1764200_s_at	478.6	P	0.000732	256.1	P	0.000244	438.5	P	0.000732	250	P	0.001221	86.5	P	0.000732	117.8	P	0.001221	MG1655_ybjE_b0874 DB_XREF=PID:g1787100 SEG=NC_000913:-913181,914128 LEN=947 DEF=putative surface protein
1764805_s_at	341	P	0.001953	102.5	P	0.008057	214.9	P	0.001953	357.5	P	0.001221	213	P	0.001221	216	P	0.001221	MG1655_aqpZ_b0875 DB_XREF=PID:g1787101 SEG=NC_000913:-914575,915270 LEN=695 DEF=transmembrane water channel; aquaporin Z
1766962_s_at	99.7	P	0.000244	68.1	P	0.000244	122	P	0.000244	132.3	P	0.000244	118.3	P	0.000732	113.8	P	0.001221	MG1655_ybjD_b0876 DB_XREF=PID:g1787102 SEG=NC_000913:+915696,917354 LEN=1658 DEF=orf, hypothetical protein
1760844_s_at	679.9	P	0.000244	406.9	P	0.000732	462	P	0.000732	762.3	P	0.000244	1110	P	0.000244	1088.2	P	0.000244	MG1655_ybjX_b0877 DB_XREF=PID:g1787103 SEG=NC_000913:-917351,918343 LEN=992 DEF=putative enzyme
1764294_s_at	535.7	P	0.000732	268.6	P	0.010742	312.6	P	0.010742	413.3	P	0.001221	366	P	0.001953	358.1	P	0.001221	MG1655_b0878 DB_XREF=PID:g1787104 SEG=NC_000913:+918431,919573 LEN=1142 DEF=putative membrane protein
1761327_s_at	1243.2	P	0.000244	396	P	0.000244	428.5	P	0.000244	693.8	P	0.000244	496.5	P	0.000244	468.3	P	0.000244	CFT073_c1016 DB_XREF=26246905 SEG=NC_004431:+976078,976422 LEN=344 DEF=Hypothetical protein
1764295_s_at	1153.4	P	0.000244	753.3	P	0.000244	877	P	0.000244	5137.9	P	0.000244	4661.8	P	0.000244	5790.3	P	0.000244	MG1655_cspD_b0880 DB_XREF=PID:g1787107 SEG=NC_000913:-921589,921813 LEN=224 DEF=stress induced DNA replication inhibitor.
1766490_s_at	2368.1	P	0.000244	2019.8	P	0.000244	1707.7	P	0.000244	2873.7	P	0.000244	3617.2	P	0.000244	3805.8	P	0.000244	MG1655_yljA_b0881 DB_XREF=PID:g1787108 SEG=NC_000913:+922136,922456 LEN=320 DEF=orf, hypothetical protein
1759918_s_at	1114	P	0.000244	825.8	P	0.000244	683.3	P	0.000244	1461.8	P	0.000244	1563.8	P	0.000244	1891.7	P	0.000244	MG1655_clpA_b0882 DB_XREF=PID:g1787109 SEG=NC_000913:+922487,924763 LEN=2276 DEF=ATP-binding component of serine protease
1762626_s_at	5708	P	0.000244	6962.2	P	0.000244	6320.3	P	0.000244	3969.8	P	0.000244	3265.3	P	0.000244	3400.3	P	0.000244	MG1655_infA_b0884 DB_XREF=PID:g1787110 SEG=NC_000913:-925448,925666 LEN=218 DEF=protein chain initiation factor IF-1
1767598_s_at	678.9	P	0.000244	351	P	0.000244	387.1	P	0.000244	392	P	0.000244	255.9	P	0.000244	207.6	P	0.000244	MG1655_aat_b0885 DB_XREF=PID:g1787111 SEG=NC_000913:-925951,926655 LEN=704 DEF=leucyl, phenylalanyl-tRNA-protein transferase
1767363_s_at	855.9	P	0.000244	323.6	P	0.000244	270.9	P	0.000244	317.5	P	0.000244	269.6	P	0.001221	342.9	P	0.000244	MG1655_cydC_b0886 DB_XREF=PID:g1787112 SEG=NC_000913:-926697,928418 LEN=1721 DEF=ATP-binding component of cytochrome-related transport
1765834_s_at	651	P	0.000244	276.9	P	0.000732	373.2	P	0.000732	327.7	P	0.000244	274.3	P	0.000244	248.4	P	0.000244	MG1655_cydD_b0887 DB_XREF=PID:g1787113 SEG=NC_000913:-928419,930185 LEN=1766 DEF=ATP-binding component of cytochrome-related transport, Zn sensitive
1761130_s_at	665.5	P	0.000244	2126.9	P	0.000244	2121.6	P	0.000244	695.9	P	0.000732	930.6	P	0.000244	1008.8	P	0.000244	MG1655_trxB_b0888 DB_XREF=PID:g1787114 SEG=NC_000913:-930308,931273 LEN=965 DEF=thioredoxin reductase
1768827_s_at	2622.5	P	0.000244	2749.7	P	0.000244	2883	P	0.000244	2996.5	P	0.000244	3955.6	P	0.000244	4397.6	P	0.000244	MG1655_lrp_b0889 DB_XREF=PID:g1787116 SEG=NC_000913:+931818,932312 LEN=494 DEF=regulator for leucine (or lrp) regulon and high-affinity branched-chain amino acid transport system
1759113_s_at	1614.5	P	0.000244	955.1	P	0.000244	894.2	P	0.000244	1024.3	P	0.000244	966.4	P	0.000244	1044	P	0.000244	MG1655_ftsK_b0890 DB_XREF=PID:g1787117 SEG=NC_000913:+932447,936436 LEN=3989 DEF=cell division protein
1764262_s_at	1465.3	P	0.000244	1423	P	0.000244	1121	P	0.000244	1427.3	P	0.000244	1433.1	P	0.000244	1706.7	P	0.000244	MG1655_lolA_b0891 DB_XREF=PID:g1787118 SEG=NC_000913:+936592,937206 LEN=614 DEF=periplasmic protein effects translocation of lipoproteins from inner membrane to outer
1765114_s_at	954.3	P	0.000244	515.3	P	0.000244	414.6	P	0.000244	535.4	P	0.000244	449.5	P	0.000244	423.3	P	0.000244	MG1655_ycaJ_b0892 DB_XREF=PID:g1787119 SEG=NC_000913:+937217,938560 LEN=1343 DEF=putative polynucleotide enzyme
1769013_s_at	3155.9	P	0.000244	2869.9	P	0.000244	2186.5	P	0.000244	2707.2	P	0.000244	2536.4	P	0.000244	2709	P	0.000244	MG1655_serS_b0893 DB_XREF=PID:g1787120 SEG=NC_000913:+938651,939943 LEN=1292 DEF=serine tRNA synthetase; also charges selenocystein tRNA with serine
1765899_s_at	379.1	P	0.000244	117.3	P	0.000732	134.2	P	0.001221	151.4	P	0.00415	89.1	P	0.010742	69	P	0.01416	CFT073_dmsA_c1031 DB_XREF=26246920 SEG=NC_004431:+995141,997585 LEN=2444 DEF=Anaerobic dimethyl sulfoxide reductase chain A precursor
1766933_s_at	187.3	P	0.000244	105.1	P	0.046143	148.8	P	0.018555	148.3	P	0.000732	131.7	P	0.01416	111.6	P	0.023926	MG1655_dmsB_b0895 DB_XREF=PID:g1787122 SEG=NC_000913:+942637,943254 LEN=617 DEF=anaerobic dimethyl sulfoxide reductase subunit B
1763364_s_at	241.6	P	0.00415	130	P	0.046143	168.3	P	0.023926	205.8	P	0.00415	184.2	P	0.010742	202.8	P	0.023926	MG1655_dmsC_b0896 DB_XREF=PID:g1787123 SEG=NC_000913:+943256,944119 LEN=863 DEF=anaerobic dimethyl sulfoxide reductase subunit C
1759749_s_at	64.5	P	0.001221	75.5	P	0.001221	60.2	P	0.001953	147.8	P	0.000244	116.8	P	0.000244	105	P	0.001221	MG1655_ycaC_b0897 DB_XREF=PID:g1787124 SEG=NC_000913:-944154,944780 LEN=626 DEF=orf, hypothetical protein
1760664_s_at	2134.2	P	0.000244	771.6	P	0.000244	813.2	P	0.000244	276.3	P	0.000244	181.1	P	0.000244	225.2	P	0.001953	MG1655_ycaD_b0898 DB_XREF=PID:g1787126 SEG=NC_000913:+945094,946242 LEN=1148 DEF=putative transport
1762873_s_at	100.2	P	0.001953	61.7	P	0.010742	78	P	0.01416	110	P	0.00415	52	P	0.023926	42	P	0.030273	MG1655_b0899 DB_XREF=PID:g1787127 SEG=NC_000913:+946260,947882 LEN=1622 DEF=putative transport
1760476_at	47.8	P	0.000244	28.4	P	0.018555	48.4	P	0.00415	63	P	0.000732	54.7	P	0.00293	47	P	0.010742	MG1655_ycaN_b0900 DB_XREF=PID:g1787128 SEG=NC_000913:-947883,948791 LEN=908 DEF=putative transcriptional regulator LYSR-type
1765581_at	59.7	P	0.000244	100.7	P	0.000732	189.2	P	0.000732	128	P	0.000244	88.9	P	0.000244	61.9	P	0.000732	MG1655_ycaK_b0901 DB_XREF=PID:g1787129 SEG=NC_000913:+948891,949481 LEN=590 DEF=orf, hypothetical protein
1759542_s_at	2600.1	P	0.000244	2437.9	P	0.000244	1973	P	0.000244	1406.8	P	0.000244	1760.8	P	0.000244	1756.5	P	0.000244	MG1655_pflA_b0902 DB_XREF=PID:g1787130 SEG=NC_000913:-949563,950303 LEN=740 DEF=pyruvate formate lyase activating enzyme 1
1767207_s_at	4621.9	P	0.000244	5680.7	P	0.000244	3868.4	P	0.000244	4213	P	0.000244	5238.1	P	0.000244	6398.8	P	0.000244	EDL933_pflB_Z1248 DB_XREF=GI:12514066 SEG=NC_002655:-1170138,1172420 LEN=2282 DEF=formate acetyltransferase 1
1761705_s_at	4572.6	P	0.000244	4472.3	P	0.000244	3599.7	P	0.000244	1334.9	P	0.000244	1233.3	P	0.000244	1363.2	P	0.000244	MG1655_focA_b0904 DB_XREF=PID:g1787132 SEG=NC_000913:-952832,953689 LEN=857 DEF=probable formate transporter (formate channel 1)
1764539_at	375.3	P	0.000244	295.2	P	0.000732	300.7	P	0.00415	165.4	P	0.005859	125.6	P	0.030273	131.5	P	0.018555	MG1655_ycaO_b0905 DB_XREF=PID:g1787133 SEG=NC_000913:-954095,955864 LEN=1769 DEF=orf, hypothetical protein
1762236_s_at	231.3	P	0.000244	128.8	P	0.000244	170.2	P	0.000244	298.9	P	0.000244	271.1	P	0.000244	297.9	P	0.000244	MG1655_ycaP_b0906 DB_XREF=PID:g1787135 SEG=NC_000913:+955985,956677 LEN=692 DEF=orf, hypothetical protein
1768528_s_at	1524.9	P	0.000244	995	P	0.000244	1170.5	P	0.000244	1873.8	P	0.000244	1841.4	P	0.000244	1817.8	P	0.000244	MG1655_serC_b0907 DB_XREF=PID:g1787136 SEG=NC_000913:+956876,957964 LEN=1088 DEF=3-phosphoserine aminotransferase
1764152_s_at	416.3	P	0.00293	206.8	P	0.010742	318.6	P	0.008057	328.1	P	0.005859	261.8	P	0.01416	229	P	0.00415	MG1655_aroA_b0908 DB_XREF=PID:g1787137 SEG=NC_000913:+958035,959318 LEN=1283 DEF=5-enolpyruvylshikimate-3-phosphate synthetase
1768197_s_at	71.8	P	0.00415	60.6	P	0.030273	48.1	P	0.023926	83.2	P	0.030273	67.5	A	0.095215	50.1	P	0.046143	MG1655_ycaL_b0909 DB_XREF=PID:g1787138 SEG=NC_000913:+959463,960251 LEN=788 DEF=putative heat shock protein
1762437_s_at	1476.7	P	0.000244	1658.8	P	0.000244	1752.1	P	0.000244	658.4	P	0.000244	548.6	P	0.000244	600.7	P	0.000244	MG1655_cmk_b0910 DB_XREF=PID:g1787139 SEG=NC_000913:+960424,961107 LEN=683 DEF=cytidylate kinase
1762512_s_at	5568.5	P	0.000244	8964.8	P	0.000244	6510.8	P	0.000244	5091.5	P	0.000244	5400	P	0.000244	6432.4	P	0.000244	MG1655_rpsA_b0911 DB_XREF=PID:g1787140 SEG=NC_000913:+961218,962891 LEN=1673 DEF=30S ribosomal subunit protein S1
1765354_s_at	2443.8	P	0.000244	3099.2	P	0.000244	3034.2	P	0.000244	3171.8	P	0.000244	3281	P	0.000244	3753.3	P	0.000244	MG1655_himD_b0912 DB_XREF=PID:g1787141 SEG=NC_000913:+963051,963335 LEN=284 DEF=integration host factor (IHF), beta subunit; site-specific recombination
1765399_at	131.2	P	0.000732	43.5	P	0.005859	82	P	0.000244	84.6	P	0.000244	48.1	P	0.00415	64.4	P	0.010742	MG1655_ycaI_b0913 DB_XREF=PID:g1787142 SEG=NC_000913:+963465,965807 LEN=2342 DEF=orf, hypothetical protein
1768530_s_at	1456.3	P	0.000244	691	P	0.000244	530.7	P	0.000244	617.6	P	0.000244	531.9	P	0.000244	484.1	P	0.000244	MG1655_msbA_b0914 DB_XREF=PID:g1787143 SEG=NC_000913:+965844,967592 LEN=1748 DEF=ATP-binding transport protein; multicopy suppressor of htrB
1765886_s_at	1006.7	P	0.000244	416	P	0.000244	275.4	P	0.000244	295.2	P	0.000244	272.9	P	0.000732	272.1	P	0.000732	MG1655_b0915 DB_XREF=PID:g1787144 SEG=NC_000913:+967589,968575 LEN=986 DEF=hypothetical protein
1768750_s_at	407.2	P	0.000244	164.6	P	0.000244	221.7	P	0.000244	203.3	P	0.000244	153.7	P	0.000244	113.1	P	0.000244	MG1655_ycaQ_b0916 DB_XREF=PID:g1787145 SEG=NC_000913:+968612,969844 LEN=1232 DEF=orf, hypothetical protein
1767400_s_at	2583.8	P	0.000244	3986.4	P	0.000244	3008.9	P	0.000244	2066.9	P	0.000244	2837	P	0.000244	2974	P	0.000244	MG1655_ycaR_b0917 DB_XREF=PID:g1787146 SEG=NC_000913:+969896,970078 LEN=182 DEF=orf, hypothetical protein
1768633_s_at	1216.6	P	0.000244	1884.9	P	0.000244	1695.1	P	0.000244	883.8	P	0.000244	1133.7	P	0.000244	1242.2	P	0.000244	MG1655_kdsB_b0918 DB_XREF=PID:g1787147 SEG=NC_000913:+970075,970821 LEN=746 DEF=CTP:CMP-3-deoxy-D-manno-octulosonate transferase
1762883_s_at	485.5	P	0.001221	220	P	0.010742	240.1	P	0.023926	522.3	P	0.000732	506.3	P	0.000732	532.8	P	0.000732	MG1655_b0919 DB_XREF=PID:g1787149 SEG=NC_000913:+970975,971868 LEN=893 DEF=orf, hypothetical protein
1767780_s_at	175.1	P	0.000244	86.2	P	0.000732	83.6	P	0.000732	104.8	P	0.000244	68.2	P	0.001953	64	P	0.001221	MG1655_ycbC_b0920 DB_XREF=PID:g1787150 SEG=NC_000913:-971845,972624 LEN=779 DEF=orf, hypothetical protein
1760097_s_at	610.8	P	0.000244	508.4	P	0.000244	546.7	P	0.000244	470.5	P	0.000244	385.5	P	0.000244	389.7	P	0.000244	MG1655_smtA_b0921 DB_XREF=PID:g1787151 SEG=NC_000913:+972760,973545 LEN=785 DEF=S-adenosylmethionine-dependent methyltransferase
1761171_s_at	626.9	P	0.00293	399.1	P	0.00293	374.1	P	0.00415	355.9	P	0.005859	282.3	P	0.008057	293.3	P	0.00415	MG1655_mukF_b0922 DB_XREF=PID:g1787152 SEG=NC_000913:+973542,974864 LEN=1322 DEF=mukF protein (killing factor KICB)
1763537_s_at	1157.8	P	0.000244	882.7	P	0.000244	714.4	P	0.000244	680.2	P	0.000244	724.1	P	0.000244	744.4	P	0.000244	MG1655_mukE_b0923 DB_XREF=PID:g1787153 SEG=NC_000913:+974872,975549 LEN=677 DEF=orf, hypothetical protein
1763861_s_at	1041.9	P	0.00293	895.1	P	0.00293	745.7	P	0.008057	606.2	P	0.005859	731.3	P	0.01416	833	P	0.008057	MG1655_mukB_b0924 DB_XREF=PID:g1787154 SEG=NC_000913:+975549,980009 LEN=4460 DEF=kinesin-like cell division protein involved in chromosome partitioning
1759853_s_at	397.1	P	0.000244	208.2	P	0.000244	221.3	P	0.000244	276.4	P	0.000244	291.8	P	0.000244	247.9	P	0.000244	MG1655_ycbB_b0925 DB_XREF=PID:g1787155 SEG=NC_000913:+980270,982117 LEN=1847 DEF=putative amidase
1764771_s_at	2615.1	P	0.000244	1013.5	P	0.001221	1132.6	P	0.001221	2492	P	0.000244	1282.3	P	0.000244	1361.4	P	0.000244	MG1655_ycbK_b0926 DB_XREF=PID:g1787157 SEG=NC_000913:+982298,982846 LEN=548 DEF=orf, hypothetical protein
1768954_s_at	1864.4	P	0.000244	742	P	0.000244	830.2	P	0.000244	1361.3	P	0.000244	643	P	0.000244	718.5	P	0.000244	MG1655_ycbL_b0927 DB_XREF=PID:g1787158 SEG=NC_000913:+982873,983520 LEN=647 DEF=orf, hypothetical protein
1767425_s_at	1652.6	P	0.000244	1308.8	P	0.000244	1166.2	P	0.000244	2744.7	P	0.000244	2968.6	P	0.000244	3592.2	P	0.000244	MG1655_aspC_b0928 DB_XREF=PID:g1787159 SEG=NC_000913:-983742,984932 LEN=1190 DEF=aspartate aminotransferase
1767981_s_at	4927.8	P	0.000244	10682.1	P	0.000244	8211.8	P	0.000244	9310.6	P	0.000244	10524.2	P	0.000244	12869.4	P	0.000244	MG1655_ompF_b0929 DB_XREF=PID:g1787160 SEG=NC_000913:-985117,986205 LEN=1088 DEF=outer membrane protein 1a (Ia;b;F)
1760462_s_at	2641.5	P	0.000244	1205.4	P	0.000244	1248.4	P	0.000244	1691.9	P	0.000244	1179.8	P	0.000244	1127.5	P	0.000244	EDL933_asnS_Z1278 DB_XREF=GI:12514105 SEG=NC_002655:-1206279,1207679 LEN=1400 DEF=asparagine tRNA synthetase
1767385_s_at	3176.5	P	0.000244	1199.8	P	0.000244	1182.8	P	0.000244	1372.9	P	0.000244	1120.1	P	0.000244	1156.6	P	0.000244	MG1655_pncB_b0931 DB_XREF=PID:g1787162 SEG=NC_000913:-988377,989579 LEN=1202 DEF=nicotinate phosphoribosyltransferase
1766129_s_at	1730.2	P	0.000244	1804.7	P	0.000244	1826.7	P	0.000244	1608.4	P	0.000244	1644.4	P	0.000732	1708	P	0.000244	MG1655_pepN_b0932 DB_XREF=PID:g1787163 SEG=NC_000913:+989845,992457 LEN=2612 DEF=aminopeptidase N
1761489_s_at	132.4	P	0.000244	122.3	P	0.000244	122	P	0.000732	277.9	P	0.000732	200.2	P	0.000244	182.8	P	0.000244	MG1655_b0933 DB_XREF=PID:g1787164 SEG=NC_000913:-992500,993267 LEN=767 DEF=putative ATP-binding component of a transport system
1765232_s_at	68.6	P	0.00293	63.7	P	0.008057	141.8	P	0.00293	170.2	P	0.001953	104.2	P	0.008057	90.5	P	0.018555	MG1655_b0934 DB_XREF=PID:g1787165 SEG=NC_000913:-993264,994100 LEN=836 DEF=putative transport system permease protein
1769191_s_at	25.3	P	0.005859	34.6	P	0.005859	43.7	P	0.005859	52.2	P	0.00415	53.7	P	0.000732	81.4	P	0.001953	CFT073_ycbN_c1078 DB_XREF=26246963 SEG=NC_004431:-1045784,1046929 LEN=1145 DEF=Alkanesulfonate monooxygenase
1768915_at	37.3	A	0.067627	53.8	P	0.037598	79.7	P	0.008057	132.6	P	0.001953	90.4	P	0.00293	77.5	P	0.005859	MG1655_b0936 DB_XREF=PID:g1787167 SEG=NC_000913:-995208,996209 LEN=1001 DEF=hypothetical protein
1760767_at	28.9	P	0.000977	47	P	0.00293	34.5	P	0.004883	103.2	P	0.00293	95.6	P	0.011719	85.8	P	0.000977	MG1655_b0937 DB_XREF=PID:g1787168 SEG=NC_000913:-996160,996735 LEN=575 DEF=hypothetical protein
1766052_s_at	48.9	P	0.001221	62.4	P	0.00293	70.4	P	0.000244	91.7	P	0.000244	70.9	P	0.001953	73.4	P	0.005859	MG1655_ycbQ_b0938 DB_XREF=PID:g1787170 SEG=NC_000913:+997082,997630 LEN=548 DEF=putative fimbrial-like protein
1764905_s_at	18.4	A	0.149658	37.5	A	0.091797	27.4	P	0.046143	55.1	P	0.037598	35.7	M	0.056152	27.2	A	0.129639	MG1655_ycbR_b0939 DB_XREF=PID:g1787171 SEG=NC_000913:+997713,998414 LEN=701 DEF=putative chaperone
1763010_at	21.7	P	0.00293	20.1	P	0.00293	60.3	P	0.000244	85.7	P	0.000244	39.7	P	0.000244	28.3	P	0.010742	MG1655_ycbS_b0940 DB_XREF=PID:g1787172 SEG=NC_000913:+998439,1001039 LEN=2600 DEF=putative outer membrane protein
1767985_at	90.2	P	0.000244	47.3	P	0.00293	73.9	P	0.000732	151.6	P	0.000244	109.8	P	0.000732	51.7	P	0.001953	MG1655_b0941 DB_XREF=PID:g1787173 SEG=NC_000913:+1001030,1002100 LEN=1070 DEF=FimH-like protein
1764655_s_at	44.6	P	0.023926	15.6	M	0.056152	46	P	0.023926	62.2	P	0.037598	61.7	P	0.018555	38.2	A	0.080566	SAKAI_ECs1026 DB_XREF=15830280 SEG=NC_002695:+1132706,1132903 LEN=197 DEF=hypothetical protein
1763745_s_at	44.1	P	0.037598	34.5	A	0.111572	40	P	0.037598	63.4	P	0.00415	47.6	P	0.030273	44	A	0.080566	MG1655_b0943 DB_XREF=PID:g1787175 SEG=NC_000913:+1002614,1003177 LEN=563 DEF=putative fimbrial-like protein
1765477_at	74.1	P	0.023926	57.8	A	0.129639	69.7	A	0.111572	79.5	P	0.030273	59.2	A	0.129639	39.7	A	0.303711	MG1655_ycbF_b0944 DB_XREF=PID:g1787176 SEG=NC_000913:+1003143,1003880 LEN=737 DEF=putative chaperone
1759907_s_at	454	P	0.000488	396.2	P	0.000488	292.1	P	0.000488	102.2	P	0.001465	96.5	P	0.003906	80.2	P	0.011719	MG1655_pyrD_b0945 DB_XREF=PID:g1787177 SEG=NC_000913:+1003991,1005001 LEN=1010 DEF=dihydro-orotate dehydrogenase
1762091_s_at	318.1	P	0.000244	83.1	P	0.000244	137.7	P	0.000244	344.8	P	0.000244	142.3	P	0.000244	132.9	P	0.000244	MG1655_ycbW_b0946 DB_XREF=PID:g1787178 SEG=NC_000913:+1005139,1005717 LEN=578 DEF=orf, hypothetical protein
1767033_s_at	743.8	P	0.000244	466.6	P	0.000244	439.6	P	0.000244	649.5	P	0.000244	544.6	P	0.000244	457.9	P	0.000244	MG1655_b0947 DB_XREF=PID:g1787179 SEG=NC_000913:-1005714,1006823 LEN=1109 DEF=orf, hypothetical protein
1768991_s_at	1084.8	P	0.000732	539.1	P	0.001221	568	P	0.001953	459.1	P	0.001221	341.1	P	0.001221	402.6	P	0.001953	MG1655_ycbY_b0948 DB_XREF=PID:g1787181 SEG=NC_000913:+1007067,1009175 LEN=2108 DEF=putative oxidoreductase
1759701_s_at	1241.5	P	0.000244	815.4	P	0.000244	827.6	P	0.000244	489.1	P	0.000244	508.6	P	0.000732	453.3	P	0.000732	EDL933_uup_Z1299 DB_XREF=GI:12514131 SEG=NC_002655:+1228658,1230565 LEN=1907 DEF=putative ATP-binding component of a transport system
1760094_s_at	539.6	P	0.000244	263.3	P	0.000244	289	P	0.000244	233.2	P	0.000244	174.6	P	0.000244	179.9	P	0.000244	MG1655_pqiA_b0950 DB_XREF=PID:g1787183 SEG=NC_000913:+1011224,1012477 LEN=1253 DEF=paraquat-inducible protein A
1763242_s_at	565.4	P	0.000244	345.4	P	0.000244	316.8	P	0.000244	296	P	0.000732	184.3	P	0.000732	171.6	P	0.001953	MG1655_pqiB_b0951 DB_XREF=PID:g1787184 SEG=NC_000913:+1012482,1014122 LEN=1640 DEF=paraquat-inducible protein B
1761931_s_at	673.1	P	0.00293	610.9	P	0.000732	511.1	P	0.000732	449.1	P	0.001953	371.7	P	0.00415	396.6	P	0.000732	MG1655_ymbA_b0952 DB_XREF=PID:g1787185 SEG=NC_000913:+1014134,1014682 LEN=548 DEF=orf, hypothetical protein
1760008_s_at	3660.6	P	0.000244	425.6	P	0.000244	740.3	P	0.000244	7453.8	P	0.000244	6314.5	P	0.000244	6582.4	P	0.000244	MG1655_rmf_b0953 DB_XREF=PID:g1787186 SEG=NC_000913:+1014938,1015105 LEN=167 DEF=ribosome modulation factor
1765179_s_at	1671.2	P	0.000244	1629.5	P	0.000244	1932.5	P	0.000244	1089.1	P	0.000244	1230.4	P	0.000244	1172	P	0.000244	MG1655_fabA_b0954 DB_XREF=PID:g1787187 SEG=NC_000913:-1015175,1015693 LEN=518 DEF=beta-hydroxydecanoyl thioester dehydrase, trans-2-decenoyl-ACP isomerase
1765116_s_at	1079.4	P	0.000244	899	P	0.000732	743.8	P	0.000732	650.5	P	0.000732	602.4	P	0.000732	507.2	P	0.000244	MG1655_b0955 DB_XREF=PID:g1787188 SEG=NC_000913:-1015762,1017522 LEN=1760 DEF=putative ATP-dependent protease
1765474_s_at	331.6	P	0.001221	312.7	P	0.001221	461.3	P	0.018555	507.4	P	0.001953	561.4	P	0.00293	557.7	P	0.001953	MG1655_ycbG_b0956 DB_XREF=PID:g1787190 SEG=NC_000913:+1017708,1018160 LEN=452 DEF=putative dehydrogenase
1765595_s_at	6281.3	P	0.000244	10490.7	P	0.000244	8427.2	P	0.000244	6912.6	P	0.000244	8384	P	0.000244	9915.8	P	0.000244	MG1655_ompA_b0957 DB_XREF=PID:g1787191 SEG=NC_000913:-1018236,1019276 LEN=1040 DEF=outer membrane protein 3a (II*;G;d)
1764904_s_at	647.6	P	0.000244	578.1	P	0.000244	607.6	P	0.000244	536.2	P	0.000244	545.9	P	0.000244	568.1	P	0.000244	MG1655_sulA_b0958 DB_XREF=PID:g1787192 SEG=NC_000913:-1019633,1020142 LEN=509 DEF=suppressor of lon; inhibits cell division and ftsZ ring formation
1767758_s_at	493.1	P	0.001221	255.8	P	0.046143	350	P	0.030273	443.5	P	0.00415	476.5	P	0.01416	452.3	P	0.030273	MG1655_b0959 DB_XREF=PID:g1787193 SEG=NC_000913:+1020361,1020990 LEN=629 DEF=orf, hypothetical protein
1759331_s_at	404.5	P	0.000732	285.2	P	0.000732	273	P	0.00415	243.4	P	0.000732	170.5	P	0.000732	213.6	P	0.001953	MG1655_b0960 DB_XREF=PID:g1787194 SEG=NC_000913:-1020953,1023115 LEN=2162 DEF=orf, hypothetical protein
1764591_s_at	706.1	P	0.000244	450.2	P	0.000244	379.6	P	0.000244	564.8	P	0.000244	436.1	P	0.000244	406.9	P	0.000244	MG1655_yccF_b0961 DB_XREF=PID:g1787195 SEG=NC_000913:-1023125,1023571 LEN=446 DEF=orf, hypothetical protein
1761007_s_at	312.6	P	0.000244	281.1	P	0.000732	271.6	P	0.000732	313.8	P	0.000244	369.1	P	0.000732	311.7	P	0.001221	MG1655_helD_b0962 DB_XREF=PID:g1787196 SEG=NC_000913:+1023694,1025748 LEN=2054 DEF=DNA helicase IV
1761604_s_at	716	P	0.000244	1407.2	P	0.000244	1233.9	P	0.000244	1637.3	P	0.000244	1705.7	P	0.000244	1925.8	P	0.000244	MG1655_mgsA_b0963 DB_XREF=PID:g1787197 SEG=NC_000913:-1025780,1026247 LEN=467 DEF=methylglyoxal synthase
1763002_s_at	80.4	P	0.046143	49.8	A	0.246094	117.3	A	0.067627	107.6	P	0.037598	50	A	0.095215	51	A	0.095215	MG1655_b0964 DB_XREF=PID:g1787198 SEG=NC_000913:-1026334,1026996 LEN=662 DEF=orf, hypothetical protein
1762634_s_at	435.5	P	0.000244	484.5	P	0.000244	360.5	P	0.000244	671.1	P	0.000244	637.5	P	0.000244	631.2	P	0.000244	EDL933_Z1317 DB_XREF=GI:12514150 SEG=NC_002655:+1246640,1247053 LEN=413 DEF=orf; Unknown function
1765036_s_at	2333.3	P	0.000244	1657	P	0.000244	1678.9	P	0.000244	1289.2	P	0.000244	1503	P	0.000244	1550.9	P	0.000244	MG1655_yccV_b0966 DB_XREF=PID:g1787200 SEG=NC_000913:-1027627,1027995 LEN=368 DEF=orf, hypothetical protein
1761768_s_at	869.9	P	0.000244	817.8	P	0.000244	726.4	P	0.000244	517.3	P	0.000244	435.8	P	0.000732	404.5	P	0.000244	MG1655_b0967 DB_XREF=PID:g1787201 SEG=NC_000913:-1028002,1029105 LEN=1103 DEF=putative oxidoreductase
1760656_s_at	345.4	P	0.000244	257	P	0.000244	341.1	P	0.000244	516.1	P	0.000244	504.2	P	0.000244	481.2	P	0.000244	MG1655_b0968 DB_XREF=PID:g1787203 SEG=NC_000913:+1029287,1029565 LEN=278 DEF=orf, hypothetical protein
1763956_s_at	1017.5	P	0.000244	767	P	0.000244	639.6	P	0.000244	902.6	P	0.000244	805.4	P	0.000732	772.5	P	0.000732	MG1655_yccK_b0969 DB_XREF=PID:g1787204 SEG=NC_000913:-1029562,1029948 LEN=386 DEF=putative sulfite reductase (EC 1.8.-.-)
1759715_s_at	2854.5	P	0.000244	2789.6	P	0.000244	2720.4	P	0.000244	3292.2	P	0.000244	2298.1	P	0.000244	2458.4	P	0.000244	MG1655_yccA_b0970 DB_XREF=PID:g1787205 SEG=NC_000913:-1029982,1030641 LEN=659 DEF=putative carriertransport protein
1765453_s_at	55.3	P	0.037598	65.2	P	0.046143	96.9	P	0.01416	94.1	P	0.018555	68.9	P	0.01416	49.9	M	0.056152	MG1655_hyaA_b0972 DB_XREF=PID:g1787206 SEG=NC_000913:+1031362,1032480 LEN=1118 DEF=hydrogenase-1 small subunit
1768184_s_at	40.6	P	0.000732	54.1	P	0.000732	80.5	P	0.000244	102	P	0.000244	63.9	P	0.000732	59.4	P	0.000732	MG1655_hyaB_b0973 DB_XREF=PID:g1787207 SEG=NC_000913:+1032477,1034270 LEN=1793 DEF=hydrogenase-1 large subunit
1765338_s_at	27	A	0.111572	31.8	A	0.27417	50.5	A	0.219482	58.9	A	0.067627	52.5	A	0.171387	46.6	A	0.246094	MG1655_hyaC_b0974 DB_XREF=PID:g1787208 SEG=NC_000913:+1034289,1034996 LEN=707 DEF=probable NiFe-hydrogenase 1 b-type cytochrome subunit
1768828_s_at	42.9	P	0.000732	61.6	P	0.000244	53	P	0.000244	79.1	P	0.000244	56.3	P	0.001953	44.7	P	0.005859	MG1655_hyaD_b0975 DB_XREF=PID:g1787209 SEG=NC_000913:+1034993,1035580 LEN=587 DEF=processing of HyaA and HyaB proteins
1761315_s_at	26.4	A	0.398926	25.8	A	0.466064	26.4	A	0.432373	59.3	A	0.432373	24.7	A	0.567627	10.1	A	0.665527	MG1655_hyaE_b0976 DB_XREF=PID:g1787210 SEG=NC_000913:+1035577,1035975 LEN=398 DEF=processing of HyaA and HyaB proteins
1762122_s_at	27.8	P	0.023926	30.3	A	0.080566	42.9	P	0.010742	52.5	P	0.00415	40.9	P	0.001221	35.1	P	0.001953	MG1655_hyaF_b0977 DB_XREF=PID:g1787211 SEG=NC_000913:+1035972,1036829 LEN=857 DEF=nickel incorporation into hydrogenase-1 proteins
1767792_s_at	70.9	P	0.000244	106.1	P	0.000244	96.8	P	0.000244	74	P	0.000244	64	P	0.000244	48.5	P	0.000244	MG1655_appC_b0978 DB_XREF=PID:g1787212 SEG=NC_000913:+1036963,1038507 LEN=1544 DEF=probable third cytochrome oxidase, subunit I
1767833_s_at	79.7	P	0.001953	127.8	P	0.000732	149.8	P	0.000244	142	P	0.001221	109.1	P	0.008057	66.3	P	0.023926	MG1655_appB_b0979 DB_XREF=PID:g1787213 SEG=NC_000913:+1038519,1039655 LEN=1136 DEF=probable third cytochrome oxidase, subunit II
1768953_s_at	81.1	P	0.000244	92.6	P	0.000732	95	P	0.001221	114.8	P	0.000244	59.1	P	0.00293	59.5	P	0.001953	MG1655_appA_b0980 DB_XREF=PID:g1787215 SEG=NC_000913:+1039840,1041138 LEN=1298 DEF=phosphoanhydride phosphorylase; pH 2.5 acid phosphatase; periplasmic
1769240_s_at	151.2	P	0.00415	107.3	P	0.046143	141.1	A	0.080566	181.2	P	0.018555	142.2	P	0.037598	115.1	M	0.056152	MG1655_yccC_b0981 DB_XREF=PID:g1787216 SEG=NC_000913:-1041253,1043433 LEN=2180 DEF=orf, hypothetical protein
1763472_s_at	81.6	P	0.000732	56.4	P	0.00415	67.2	P	0.00293	107.8	P	0.000732	77.8	P	0.008057	79	P	0.010742	MG1655_yccY_b0982 DB_XREF=PID:g1787217 SEG=NC_000913:-1043453,1043911 LEN=458 DEF=putative phosphatase
1766718_s_at	74.1	P	0.000244	42.7	P	0.00415	71.8	P	0.000732	75.8	P	0.000244	48	P	0.000732	46.3	P	0.005859	MG1655_yccZ_b0983 DB_XREF=PID:g1787218 SEG=NC_000913:-1043887,1045026 LEN=1139 DEF=putative function in exopolysaccharide production
1762456_s_at	42.2	P	0.008057	37.4	P	0.037598	36.5	A	0.067627	65.7	P	0.01416	50.3	M	0.056152	27.4	P	0.030273	MG1655_ymcA_b0984 DB_XREF=PID:g1787219 SEG=NC_000913:-1045072,1047168 LEN=2096 DEF=orf, hypothetical protein
1762584_s_at	43.5	P	0.008057	37	P	0.030273	48.7	P	0.01416	100.5	P	0.001221	56.4	P	0.018555	36.8	P	0.046143	MG1655_ymcB_b0985 DB_XREF=PID:g1787220 SEG=NC_000913:-1047168,1047914 LEN=746 DEF=orf, hypothetical protein
1766578_s_at	23.9	P	0.023926	25.3	A	0.067627	43.8	P	0.023926	71	P	0.023926	34.5	P	0.023926	29.9	P	0.029297	MG1655_ymcC_b0986 DB_XREF=PID:g1787221 SEG=NC_000913:-1047911,1048555 LEN=644 DEF=putative regulator
1764173_s_at	305.7	P	0.000244	178.5	P	0.000244	162.2	P	0.000244	360.2	P	0.000244	232.4	P	0.000732	147.2	P	0.000244	MG1655_ymcD_b0987 DB_XREF=PID:g1787222 SEG=NC_000913:-1048662,1048985 LEN=323 DEF=orf, hypothetical protein
1765133_s_at	321.3	P	0.00415	505	P	0.00293	836.4	P	0.005859	177.9	P	0.046143	117.1	A	0.067627	65.7	A	0.129639	MG1655_cspH_b0989 DB_XREF=PID:g2367112 SEG=NC_000913:-1050186,1050398 LEN=212 DEF=cold shock-like protein
1763772_s_at	6645.2	P	0.000244	7543	P	0.000244	8095.6	P	0.000244	2549	P	0.000244	1434.6	P	0.000244	937.7	P	0.000244	MG1655_cspG_b0990 DB_XREF=PID:g2367114 SEG=NC_000913:+1050684,1050896 LEN=212 DEF=homolog of Salmonella cold shock protein
1766573_s_at	607.7	P	0.000244	161.5	P	0.000244	408.1	P	0.000244	171	P	0.000244	86.5	P	0.000244	46.1	P	0.000244	MG1655_sfa_b0991 DB_XREF=PID:g1787225 SEG=NC_000913:+1051070,1051300 LEN=230 DEF=suppresses fabA and ts growth mutation
1766715_s_at	88.2	P	0.000244	43.8	P	0.00293	74.2	P	0.00415	100.3	P	0.000732	40.5	P	0.00415	26.7	P	0.018555	MG1655_yccM_b0992 DB_XREF=PID:g1787226 SEG=NC_000913:-1051512,1052585 LEN=1073 DEF=orf, hypothetical protein
1761370_at	99.7	P	0.000244	43.6	P	0.00415	50.1	P	0.000244	114.7	P	0.000244	73.5	P	0.000732	58.2	P	0.000732	MG1655_torS_b0993 DB_XREF=PID:g1787227 SEG=NC_000913:-1052657,1055371 LEN=2714 DEF=TorS
1765520_s_at	52.5	P	0.046143	41.2	A	0.067627	41.5	A	0.067627	65.1	M	0.056152	44.7	A	0.149658	35.2	A	0.129639	MG1655_torT_b0994 DB_XREF=PID:g1787228 SEG=NC_000913:+1055484,1056512 LEN=1028 DEF=part of regulation of tor operon, periplasmic
1765248_s_at	136.8	P	0.001953	90	P	0.018555	90.2	P	0.023926	162.3	P	0.010742	101.6	P	0.023926	81.6	P	0.037598	MG1655_torR_b0995 DB_XREF=PID:g1787229 SEG=NC_000913:-1056485,1057177 LEN=692 DEF=response transcriptional regulator for torA (sensor TorS)
1762674_s_at	18.3	P	0.008057	40.1	P	0.001953	40.2	P	0.00293	51.8	P	0.000244	53.1	P	0.000732	38.1	P	0.00293	MG1655_torC_b0996 DB_XREF=PID:g1787230 SEG=NC_000913:+1057307,1058479 LEN=1172 DEF=trimethylamine N-oxide reductase, cytochrome c-type subunit
1760518_s_at	87.8	P	0.000732	83	P	0.001221	93.4	P	0.000244	130.6	P	0.000244	90.4	P	0.000244	79.8	P	0.000732	MG1655_torA_b0997 DB_XREF=PID:g1787231 SEG=NC_000913:+1058479,1061025 LEN=2546 DEF=trimethylamine N-oxide reductase subunit
1764937_s_at	99.4	P	0.008057	36.7	A	0.111572	50	P	0.030273	80.5	P	0.046143	73.4	P	0.030273	51.9	M	0.056152	MG1655_torD_b0998 DB_XREF=PID:g1787232 SEG=NC_000913:+1061022,1061621 LEN=599 DEF=part of trimethylamine-N-oxide oxidoreductase
1761834_s_at	111.6	P	0.000244	162.6	P	0.000244	168.7	P	0.000244	113.2	P	0.000244	130.1	P	0.000732	125.8	P	0.00293	MG1655_yccD_b0999 DB_XREF=PID:g1787234 SEG=NC_000913:-1061773,1062078 LEN=305 DEF=orf, hypothetical protein
1767087_s_at	228.6	P	0.001221	239.8	P	0.000244	283.8	P	0.000244	241.7	P	0.000732	273.1	P	0.000244	247.7	P	0.000732	MG1655_cbpA_b1000 DB_XREF=PID:g1787235 SEG=NC_000913:-1062078,1062998 LEN=920 DEF=curved DNA-binding protein; functions closely related to DnaJ
1759330_at	38.2	P	0.00415	65.4	P	0.001953	97	P	0.030273	98.5	P	0.01416	64.2	P	0.030273	45.4	P	0.046143	MG1655_yccE_b1001 DB_XREF=PID:g1787236 SEG=NC_000913:+1063259,1064515 LEN=1256 DEF=orf, hypothetical protein
1760217_s_at	34.7	P	0.00293	43.5	P	0.001953	36.6	P	0.010742	528.4	P	0.000244	408.5	P	0.000244	439.8	P	0.000244	CFT073_c1138 DB_XREF=26247023 SEG=NC_004431:+1100241,1100495 LEN=254 DEF=Hypothetical protein
1769106_s_at	97.5	P	0.000244	129.5	P	0.000244	121.7	P	0.000244	185.2	P	0.000244	150.5	P	0.000244	160.6	P	0.000244	MG1655_yccJ_b1003 DB_XREF=PID:g1787238 SEG=NC_000913:-1066087,1066314 LEN=227 DEF=orf, hypothetical protein
1766101_s_at	133.5	P	0.018555	167.4	P	0.030273	215	P	0.030273	303.6	P	0.023926	222.2	P	0.030273	250.2	P	0.030273	MG1655_wrbA_b1004 DB_XREF=PID:g1787239 SEG=NC_000913:-1066335,1066931 LEN=596 DEF=flavoprotein WrbA (Trp repressor binding protein)
1768649_at	144.2	P	0.000244	103.3	P	0.000732	184.2	P	0.000244	164.9	P	0.000244	130.5	P	0.000732	130	P	0.000244	MG1655_ycdF_b1005 DB_XREF=PID:g1787240 SEG=NC_000913:+1067141,1067371 LEN=230 DEF=orf, hypothetical protein
1768877_s_at	51.2	P	0.000732	52.3	P	0.00293	55.6	P	0.005859	67.8	P	0.000244	72.7	P	0.000244	62.6	P	0.001221	MG1655_ycdG_b1006 DB_XREF=PID:g1787241 SEG=NC_000913:-1067734,1069128 LEN=1394 DEF=putative transport protein
1762225_s_at	35.9	P	0.018555	54.9	P	0.010742	89.1	P	0.001953	112.7	P	0.001953	74.5	P	0.00415	57.5	P	0.00415	MG1655_b1007 DB_XREF=PID:g1787242 SEG=NC_000913:-1069083,1069541 LEN=458 DEF=hypothetical protein
1760776_s_at	21.5	A	0.129639	42.6	A	0.111572	37.3	P	0.030273	71	P	0.00415	50.3	P	0.030273	45.3	M	0.056152	MG1655_b1008 DB_XREF=PID:g1787243 SEG=NC_000913:-1069588,1070178 LEN=590 DEF=hypothetical protein
1763939_s_at	33.5	P	0.00415	52.7	P	0.008057	81.7	P	0.023926	73.6	P	0.000732	56.9	P	0.000244	44.6	P	0.000244	MG1655_b1009 DB_XREF=PID:g1787244 SEG=NC_000913:-1070188,1070988 LEN=800 DEF=putative acetyltransferase
1763305_s_at	74.7	A	0.067627	109.3	P	0.005859	144.7	P	0.010742	197.3	P	0.008057	189.6	P	0.023926	137.2	P	0.037598	MG1655_b1010 DB_XREF=PID:g1787245 SEG=NC_000913:-1070996,1071382 LEN=386 DEF=hypothetical protein
1766883_s_at	21.3	P	0.01416	38.9	P	0.005859	109	P	0.001221	155.1	P	0.001953	113.8	P	0.001221	45.5	P	0.005859	MG1655_b1011 DB_XREF=PID:g1787246 SEG=NC_000913:-1071394,1072128 LEN=734 DEF=putative synthetase
1768149_s_at	23	M	0.056152	46	P	0.010742	67.6	P	0.023926	89.6	P	0.00293	61.6	P	0.008057	32.1	P	0.037598	MG1655_b1012 DB_XREF=PID:g1787247 SEG=NC_000913:-1072086,1073234 LEN=1148 DEF=hypothetical protein
1763236_s_at	193.1	P	0.000244	347.3	P	0.000244	465.4	P	0.000244	267.2	P	0.001953	310.8	P	0.00415	296.6	P	0.00293	MG1655_ycdC_b1013 DB_XREF=PID:g1787249 SEG=NC_000913:+1073465,1074103 LEN=638 DEF=hypothetical transcriptional regulator
1766150_s_at	97.3	P	0.023926	230.2	P	0.023926	291.5	P	0.023926	458.6	P	0.000244	342.3	P	0.000732	392.3	P	0.000732	MG1655_putA_b1014 DB_XREF=PID:g1787250 SEG=NC_000913:-1074143,1078105 LEN=3962 DEF=proline dehydrogenase, P5C dehydrogenase
1763553_s_at	299.7	P	0.001953	151.3	P	0.01416	162.8	P	0.01416	481.2	P	0.001953	329.9	P	0.00293	392	P	0.001953	MG1655_putP_b1015 DB_XREF=PID:g1787251 SEG=NC_000913:+1078528,1080036 LEN=1508 DEF=major sodiumproline symporter
1760434_s_at	547.6	P	0.000244	580.4	P	0.000244	661.2	P	0.000244	232.2	P	0.023926	957.8	P	0.005859	988.8	P	0.00415	MG1655_b1016 DB_XREF=PID:g1787252 SEG=NC_000913:+1080570,1080689 LEN=119 DEF=orf, hypothetical protein
1760869_s_at	271	P	0.030273	247.2	P	0.046143	290.4	A	0.095215	113.8	A	0.129639	371.2	A	0.067627	341.9	M	0.056152	MG1655_b1017 DB_XREF=PID:g1787253 SEG=NC_000913:+1080677,1081408 LEN=731 DEF=high-affinity iron permease
1764800_s_at	337.4	P	0.000244	295.5	P	0.000244	221.5	P	0.000732	52.9	P	0.023926	251.2	P	0.000244	280.5	P	0.000244	MG1655_ycdO_b1018 DB_XREF=PID:g1787254 SEG=NC_000913:+1081466,1082593 LEN=1127 DEF=orf, hypothetical protein
1763648_s_at	262.7	P	0.000732	199.7	P	0.000732	303.1	P	0.000244	128.8	P	0.001221	240.4	P	0.000244	230.9	P	0.000732	MG1655_ycdB_b1019 DB_XREF=PID:g1787255 SEG=NC_000913:+1082599,1083870 LEN=1271 DEF=orf, hypothetical protein
1762461_s_at	245.7	P	0.000244	263.3	P	0.000244	223.9	P	0.000244	315.4	P	0.000244	525	P	0.000244	588.4	P	0.000244	CFT073_phoH_c1159 DB_XREF=26247044 SEG=NC_004431:+1118312,1119235 LEN=923 DEF=PhoH protein
1767075_s_at	154.8	P	0.000732	129.1	P	0.001221	168.9	P	0.001953	155.1	P	0.001953	111.9	P	0.001953	93.6	P	0.001221	MG1655_ycdP_b1021 DB_XREF=PID:g1787258 SEG=NC_000913:-1085329,1085742 LEN=413 DEF=orf, hypothetical protein
1767261_s_at	49.7	P	0.000732	55.9	P	0.000732	49	P	0.001953	86.5	P	0.000244	66.9	P	0.001953	33.9	P	0.00415	MG1655_ycdQ_b1022 DB_XREF=PID:g1787259 SEG=NC_000913:-1085744,1087069 LEN=1325 DEF=orf, hypothetical protein
1766584_s_at	49.4	P	0.018555	60.5	P	0.000732	77.6	P	0.001953	97.6	P	0.00415	48.5	P	0.001953	63.3	P	0.01416	MG1655_ycdR_b1023 DB_XREF=PID:g1787260 SEG=NC_000913:-1087062,1089080 LEN=2018 DEF=orf, hypothetical protein
1769025_s_at	39.8	A	0.095215	48.6	P	0.018555	52.6	P	0.030273	56.9	P	0.010742	34.8	P	0.030273	24.2	A	0.080566	MG1655_ycdS_b1024 DB_XREF=PID:g1787261 SEG=NC_000913:-1089089,1091512 LEN=2423 DEF=putative outer membrane protein
1762359_s_at	66.5	P	0.000732	101.8	P	0.000244	96.6	P	0.000244	125.2	P	0.000244	98	P	0.000732	99.8	P	0.000732	MG1655_ycdT_b1025 DB_XREF=PID:g1787262 SEG=NC_000913:+1092099,1093457 LEN=1358 DEF=orf, hypothetical protein
1763030_s_at	21.5	P	0.046143	32.4	P	0.01416	46.3	P	0.001953	43	P	0.001221	62.6	P	0.00293	31.7	P	0.046143	MG1655_b1028 DB_XREF=PID:g1787266 SEG=NC_000913:+1094746,1095069 LEN=323 DEF=orf, hypothetical protein
1760492_s_at	42.5	P	0.000244	32.7	P	0.00293	81.7	P	0.000244	127.2	P	0.000244	83.3	P	0.000244	36.9	P	0.000732	MG1655_ycdU_b1029 DB_XREF=PID:g1787267 SEG=NC_000913:+1095066,1096052 LEN=986 DEF=orf, hypothetical protein
1761794_s_at	660.3	P	0.000244	364.8	P	0.000244	491.7	P	0.000244	525.1	P	0.000244	683.8	P	0.000244	637	P	0.000244	MG1655_ycdW_b1033 DB_XREF=PID:g1787270 SEG=NC_000913:+1097070,1098047 LEN=977 DEF=putative dehydrogenase
1765413_s_at	1150.9	P	0.000244	920.7	P	0.000244	975.3	P	0.000244	845.1	P	0.000244	767.8	P	0.000244	726.7	P	0.000244	MG1655_ycdX_b1034 DB_XREF=PID:g1787271 SEG=NC_000913:+1098102,1098839 LEN=737 DEF=orf, hypothetical protein
1763589_s_at	1010.3	P	0.000244	890.4	P	0.000244	940.1	P	0.000244	838.9	P	0.000244	712.6	P	0.000244	705.8	P	0.000244	MG1655_ycdY_b1035 DB_XREF=PID:g1787272 SEG=NC_000913:+1098863,1099417 LEN=554 DEF=putative oxidoreductase component
1766390_s_at	625.3	P	0.000244	443.6	P	0.000244	606.3	P	0.000244	251.9	P	0.001221	292.9	P	0.000244	279.8	P	0.000244	MG1655_ycdZ_b1036 DB_XREF=PID:g1787273 SEG=NC_000913:+1099471,1100010 LEN=539 DEF=orf, hypothetical protein
1759837_s_at	47.8	A	0.095215	41.6	A	0.095215	50.7	A	0.067627	80.7	P	0.018555	42.1	A	0.067627	50.8	A	0.095215	MG1655_csgG_b1037 DB_XREF=PID:g1787274 SEG=NC_000913:-1100074,1100907 LEN=833 DEF=curli production assemblytransport component, 2nd curli operon
1762208_s_at	45.5	P	0.000732	25.3	P	0.00293	55.2	P	0.000244	127.7	P	0.000244	45.6	P	0.000732	37.8	P	0.000244	MG1655_csgF_b1038 DB_XREF=PID:g1787275 SEG=NC_000913:-1100934,1101350 LEN=416 DEF=curli production assemblytransport component, 2nd curli operon
1764164_s_at	71.5	P	0.00293	41.7	P	0.018555	89.5	P	0.000732	165.1	P	0.000244	78.8	P	0.00293	48.4	P	0.00293	MG1655_csgE_b1039 DB_XREF=PID:g1787276 SEG=NC_000913:-1101375,1101764 LEN=389 DEF=curli production assemblytransport component, 2nd curli operon
1768557_s_at	141.9	P	0.000732	63.9	P	0.010742	129.9	P	0.00415	200.7	P	0.000732	79	P	0.000732	83.5	P	0.008057	MG1655_csgD_b1040 DB_XREF=PID:g1787277 SEG=NC_000913:-1101769,1102419 LEN=650 DEF=putative 2-component transcriptional regulator for 2nd curli operon
1762325_s_at	15.8	P	0.046143	35.6	P	0.046143	54.1	P	0.010742	70.7	P	0.00415	44	P	0.008057	27	A	0.095215	MG1655_csgB_b1041 DB_XREF=PID:g1787278 SEG=NC_000913:+1103174,1103629 LEN=455 DEF=minor curlin subunit precursor, similar ro CsgA
1766210_at	57.9	P	0.000244	117.8	P	0.000244	112.5	P	0.000244	206.6	P	0.000244	119	P	0.000244	119	P	0.000732	MG1655_csgA_b1042 DB_XREF=PID:g1787279 SEG=NC_000913:+1103670,1104125 LEN=455 DEF=curlin major subunit, coiled surface structures; cryptic
1769120_s_at	32.7	P	0.000244	31.7	P	0.001221	35.2	P	0.000732	100	P	0.000244	51.7	P	0.000244	30.6	P	0.000244	MG1655_csgC_b1043 DB_XREF=PID:g1787280 SEG=NC_000913:+1104184,1104516 LEN=332 DEF=putative curli production protein
1764274_s_at	37.3	P	0.005859	252.6	P	0.000244	483.7	P	0.000732	312.1	P	0.000244	260.5	P	0.000244	256.2	P	0.000244	MG1655_b1044 DB_XREF=PID:g1787281 SEG=NC_000913:+1104637,1104948 LEN=311 DEF=orf, hypothetical protein
1761941_s_at	251.1	P	0.000244	221.7	P	0.000244	302.4	P	0.000244	407.2	P	0.000244	358.9	P	0.000244	313.6	P	0.000244	MG1655_b1045 DB_XREF=PID:g1787283 SEG=NC_000913:+1105043,1105576 LEN=533 DEF=putative polyprotein
1761915_s_at	110.5	P	0.000244	63.6	P	0.000732	90.2	P	0.000244	95.3	P	0.000244	80.7	P	0.000244	61.2	P	0.000244	MG1655_ymdC_b1046 DB_XREF=PID:g1787284 SEG=NC_000913:+1105518,1106999 LEN=1481 DEF=putative synthase
1766668_s_at	130.6	P	0.000732	143.3	P	0.000732	220.7	P	0.000244	102.4	P	0.000732	68.5	P	0.005859	48.7	P	0.01416	MG1655_b1047 DB_XREF=PID:g1787285 SEG=NC_000913:-1107007,1108164 LEN=1157 DEF=hypothetical protein
1766387_s_at	1400.2	P	0.000244	1096.8	P	0.000244	889.9	P	0.000244	845.8	P	0.000244	741.5	P	0.000244	806.6	P	0.000244	MG1655_mdoG_b1048 DB_XREF=PID:g1787286 SEG=NC_000913:+1108558,1110093 LEN=1535 DEF=periplasmic glucans biosynthesis protein
1766780_s_at	1070	P	0.000244	704.5	P	0.000244	657.4	P	0.000244	477.1	P	0.000244	393.3	P	0.000244	447.7	P	0.000244	MG1655_mdoH_b1049 DB_XREF=PID:g1787287 SEG=NC_000913:+1110086,1112629 LEN=2543 DEF=membrane glycosyltransferase; synthesis of membrane-derived oligosaccharide (MDO)
1767925_s_at	332.6	P	0.000244	277.6	P	0.000244	281.4	P	0.000244	438.5	P	0.000244	345.6	P	0.000244	301	P	0.000244	MG1655_yceK_b1050 DB_XREF=PID:g1787288 SEG=NC_000913:+1112802,1113029 LEN=227 DEF=orf, hypothetical protein
1764777_s_at	488.3	P	0.000244	408	P	0.000244	409.9	P	0.000244	479.8	P	0.000244	439.2	P	0.000244	434.4	P	0.000244	MG1655_msyB_b1051 DB_XREF=PID:g1787289 SEG=NC_000913:-1113030,1113407 LEN=377 DEF=acidic protein suppresses mutants lacking function of protein export
1764122_s_at	159.3	P	0.000244	93.3	P	0.000244	107	P	0.000244	162.7	P	0.000244	105.4	P	0.000244	85.2	P	0.000732	MG1655_b1052 DB_XREF=PID:g1787290 SEG=NC_000913:-1113434,1113532 LEN=98 DEF=orf, hypothetical protein
1761361_s_at	348	P	0.000244	212.2	P	0.000244	284.6	P	0.000244	280.7	P	0.00293	229.3	P	0.010742	189	P	0.01416	MG1655_yceE_b1053 DB_XREF=PID:g1787291 SEG=NC_000913:-1113487,1114713 LEN=1226 DEF=putative transport protein
1764571_s_at	779	P	0.000244	515.2	P	0.000244	617.7	P	0.000244	444.1	P	0.000244	315.8	P	0.000244	334.2	P	0.000244	MG1655_htrB_b1054 DB_XREF=PID:g1787292 SEG=NC_000913:-1114885,1115805 LEN=920 DEF=heat shock protein
1764102_s_at	446.2	P	0.000244	619.4	P	0.000244	696.1	P	0.000244	581.7	P	0.000244	303.7	P	0.000244	356.6	P	0.000244	MG1655_yceA_b1055 DB_XREF=PID:g1787294 SEG=NC_000913:+1116030,1117082 LEN=1052 DEF=orf, hypothetical protein
1760911_s_at	106.5	P	0.000732	189.8	P	0.000244	197.8	P	0.000244	270.9	P	0.000244	270.1	P	0.000244	243.3	P	0.000244	MG1655_yceI_b1056 DB_XREF=PID:g1787295 SEG=NC_000913:-1117124,1117699 LEN=575 DEF=orf, hypothetical protein
1760967_s_at	147.7	P	0.000244	126.3	P	0.001953	216.5	P	0.000244	358.5	P	0.000244	197.5	P	0.001953	184.4	P	0.001953	MG1655_b1057 DB_XREF=PID:g1787296 SEG=NC_000913:-1117703,1118269 LEN=566 DEF=putative cytochrome
1768798_s_at	54.8	P	0.000732	36.4	P	0.000244	96	P	0.000244	114	P	0.000244	62.5	P	0.008057	45.5	P	0.037598	MG1655_yceO_b1058 DB_XREF=PID:g1787297 SEG=NC_000913:-1118530,1118670 LEN=140 DEF=orf, hypothetical protein
1765962_s_at	239.5	P	0.000244	197.4	P	0.000244	305.3	P	0.000732	362.7	P	0.000244	270.7	P	0.000244	289.5	P	0.000244	MG1655_solA_b1059 DB_XREF=PID:g1787298 SEG=NC_000913:-1118691,1119809 LEN=1118 DEF=sarcosine oxidase-like protein
1763516_s_at	2426.5	P	0.000244	3012.8	P	0.000244	3202.2	P	0.000244	1307.7	P	0.000244	1292.8	P	0.000244	1311.9	P	0.000244	MG1655_yceP_b1060 DB_XREF=PID:g1787299 SEG=NC_000913:-1119924,1120178 LEN=254 DEF=orf, hypothetical protein
1763947_s_at	883.9	P	0.000244	780.7	P	0.000244	1186.6	P	0.000244	1068.6	P	0.000244	511.7	P	0.000244	475.4	P	0.000244	MG1655_dinI_b1061 DB_XREF=PID:g1787300 SEG=NC_000913:-1120465,1120710 LEN=245 DEF=damage-inducible protein I
1767560_s_at	477.5	P	0.000244	505.1	P	0.000244	502.1	P	0.000244	282.8	P	0.000244	283.8	P	0.000244	366.9	P	0.000244	MG1655_pyrC_b1062 DB_XREF=PID:g1787301 SEG=NC_000913:-1120784,1121830 LEN=1046 DEF=dihydro-orotase
1764292_s_at	793.3	P	0.000244	739.1	P	0.000244	886.4	P	0.000244	580.4	P	0.000244	509.8	P	0.000244	576.3	P	0.000732	MG1655_yceB_b1063 DB_XREF=PID:g1787302 SEG=NC_000913:-1121936,1122496 LEN=560 DEF=orf, hypothetical protein
1768534_s_at	777.9	P	0.000244	1391.4	P	0.000244	1313.9	P	0.000244	1351.8	P	0.000244	1793.1	P	0.000244	1860.1	P	0.000244	MG1655_grxB_b1064 DB_XREF=PID:g1787303 SEG=NC_000913:-1122630,1123277 LEN=647 DEF=glutaredoxin 2
1769054_s_at	723.8	P	0.000244	123.8	P	0.000244	164.6	P	0.000244	229.9	P	0.000244	166.5	P	0.005859	133.1	P	0.005859	MG1655_yceL_b1065 DB_XREF=PID:g1787304 SEG=NC_000913:-1123341,1124579 LEN=1238 DEF=orf, hypothetical protein
1760597_s_at	691.5	P	0.000244	504.4	P	0.000244	788.8	P	0.000244	818.7	P	0.000244	528.3	P	0.000732	612.1	P	0.000244	MG1655_rimJ_b1066 DB_XREF=PID:g1787305 SEG=NC_000913:+1124785,1125369 LEN=584 DEF=acetylation of N-terminal alanine of 30S ribosomal subunit protein S5
1769064_s_at	483	P	0.000244	288.2	P	0.000244	395.5	P	0.000244	480.7	P	0.000244	418.9	P	0.000244	455.3	P	0.000244	MG1655_yceH_b1067 DB_XREF=PID:g1787306 SEG=NC_000913:+1125380,1126027 LEN=647 DEF=orf, hypothetical protein
1768381_s_at	332.9	P	0.000732	142.4	P	0.000244	249.9	P	0.000732	307.2	P	0.000732	190.6	P	0.000244	175	P	0.001221	MG1655_mviM_b1068 DB_XREF=PID:g1787307 SEG=NC_000913:+1126029,1126952 LEN=923 DEF=putative virulence factor
1768968_s_at	759.1	P	0.000244	255.3	P	0.000244	238	P	0.000732	411.8	P	0.000244	232.6	P	0.000732	207.8	P	0.000732	MG1655_mviN_b1069 DB_XREF=PID:g1787309 SEG=NC_000913:+1127062,1128597 LEN=1535 DEF=putative virulence factor
1762983_s_at	163.7	P	0.000732	1735.8	P	0.000244	2017.1	P	0.000244	524.7	P	0.000244	4020.4	P	0.000244	3826.1	P	0.000244	MG1655_flgN_b1070 DB_XREF=PID:g1787310 SEG=NC_000913:-1128637,1129053 LEN=416 DEF=protein of flagellar biosynthesis
1768555_s_at	237.5	P	0.000732	2787.3	P	0.000244	2233.9	P	0.000244	894.6	P	0.000244	5217.9	P	0.000244	5575.1	P	0.000244	MG1655_flgM_b1071 DB_XREF=PID:g1787311 SEG=NC_000913:-1129058,1129351 LEN=293 DEF=anti-FliA (anti-sigma) factor; also known as RflB protein
1763116_s_at	99.1	P	0.000244	1492	P	0.000244	1663.7	P	0.000244	1071	P	0.000244	1310.8	P	0.000244	1483.7	P	0.000244	MG1655_flgA_b1072 DB_XREF=PID:g1787312 SEG=NC_000913:-1129427,1130086 LEN=659 DEF=flagellar biosynthesis; assembly of basal-body periplasmic P ring
1762105_s_at	33.5	P	0.00293	1989.7	P	0.000244	2071.6	P	0.000244	2218.6	P	0.000244	2548.8	P	0.000244	2671.9	P	0.000244	MG1655_flgB_b1073 DB_XREF=PID:g1787313 SEG=NC_000913:+1130241,1130657 LEN=416 DEF=flagellar biosynthesis, cell-proximal portion of basal-body rod
1768120_s_at	29.9	P	0.018555	2245.8	P	0.000244	1988.4	P	0.000244	2132.5	P	0.000244	2914.2	P	0.000244	3017.9	P	0.000244	MG1655_flgC_b1074 DB_XREF=PID:g1787314 SEG=NC_000913:+1130661,1131065 LEN=404 DEF=flagellar biosynthesis, cell-proximal portion of basal-body rod
1760643_s_at	18.7	A	0.303711	1235.4	P	0.000244	837.9	P	0.000244	1352	P	0.000244	1946.7	P	0.000244	1851.2	P	0.000244	MG1655_flgD_b1075 DB_XREF=PID:g1787315 SEG=NC_000913:+1131077,1131772 LEN=695 DEF=flagellar biosynthesis, initiation of hook assembly
1768112_at	43.8	P	0.000244	2423.2	P	0.000244	1986.4	P	0.000244	2365.9	P	0.000244	3062	P	0.000244	3214.2	P	0.000244	MG1655_flgE_b1076 DB_XREF=PID:g1787316 SEG=NC_000913:+1131797,1133005 LEN=1208 DEF=flagellar biosynthesis, hook protein
1759235_at	23.6	P	0.00415	1271.2	P	0.000244	863.9	P	0.000244	933.2	P	0.000244	1502.8	P	0.000244	1511.3	P	0.000244	MG1655_flgF_b1077 DB_XREF=PID:g1787317 SEG=NC_000913:+1133025,1133780 LEN=755 DEF=flagellar biosynthesis, cell-proximal portion of basal-body rod
1767435_s_at	53.9	P	0.023926	1986.3	P	0.000244	1646.5	P	0.000244	1802.6	P	0.000244	2691	P	0.000244	2618.8	P	0.000244	MG1655_flgG_b1078 DB_XREF=PID:g1787318 SEG=NC_000913:+1133952,1134734 LEN=782 DEF=flagellar biosynthesis, cell-distal portion of basal-body rod
1768045_s_at	37.8	M	0.056152	735	P	0.000244	769.9	P	0.000244	994.2	P	0.000244	1128.7	P	0.000244	948.1	P	0.000244	MG1655_flgH_b1079 DB_XREF=PID:g1787319 SEG=NC_000913:+1134787,1135485 LEN=698 DEF=flagellar biosynthesis, basal-body outer-membrane L (lipopolysaccharide layer) ring protein
1765040_s_at	35.9	P	0.005859	536.9	P	0.000244	482.3	P	0.000244	691	P	0.000244	867.5	P	0.000244	683.6	P	0.000244	MG1655_flgI_b1080 DB_XREF=PID:g1787320 SEG=NC_000913:+1135497,1136594 LEN=1097 DEF=homolog of Salmonella P-ring of flagella basal body
1763207_s_at	57.3	P	0.000244	855	P	0.000244	885.7	P	0.000244	739	P	0.000244	928	P	0.000244	782.1	P	0.000244	MG1655_flgJ_b1081 DB_XREF=PID:g1787321 SEG=NC_000913:+1136594,1137535 LEN=941 DEF=flagellar biosynthesis
1761245_s_at	23.4	A	0.149658	984.6	P	0.000244	749.7	P	0.000244	497.5	P	0.000244	2911.2	P	0.000244	3102	P	0.000244	MG1655_flgK_b1082 DB_XREF=PID:g1787323 SEG=NC_000913:+1137601,1139244 LEN=1643 DEF=flagellar biosynthesis, hook-filament junction protein 1
1768710_s_at	137.5	P	0.001953	1556.4	P	0.000244	1679	P	0.000244	1134.4	P	0.000244	4023.6	P	0.000244	4399.8	P	0.000244	MG1655_flgL_b1083 DB_XREF=PID:g1787324 SEG=NC_000913:+1139256,1140209 LEN=953 DEF=flagellar biosynthesis; hook-filament junction protein
1761660_s_at	3028.3	P	0.000244	2591.6	P	0.000244	2336.6	P	0.000244	2004.3	P	0.000244	1906.2	P	0.000244	1751.1	P	0.000244	CFT073_rne_c1353 DB_XREF=26247224 SEG=NC_004431:-1284682,1287867 LEN=3185 DEF=Ribonuclease E
1767955_s_at	97.8	P	0.000244	73.1	P	0.000244	116.9	P	0.000244	157.2	P	0.000244	76.5	P	0.000244	62.9	P	0.000244	MG1655_b1085 DB_XREF=PID:g1787326 SEG=NC_000913:+1143671,1144045 LEN=374 DEF=orf, hypothetical protein
1760443_s_at	729.7	P	0.000244	552.6	P	0.000244	606.7	P	0.000244	336.7	P	0.000244	225.1	P	0.000732	257	P	0.000244	MG1655_b1086 DB_XREF=PID:g1787327 SEG=NC_000913:+1144163,1145122 LEN=959 DEF=hypothetical protein
1769146_s_at	592	P	0.000244	301.5	P	0.000244	455.3	P	0.000244	873.1	P	0.000244	615.8	P	0.000244	684	P	0.000244	MG1655_yceF_b1087 DB_XREF=PID:g1787328 SEG=NC_000913:-1145234,1145857 LEN=623 DEF=orf, hypothetical protein
1763932_at	4060.7	P	0.000244	5254.4	P	0.000244	5105.2	P	0.000244	3070.5	P	0.000244	3102.7	P	0.000244	3706.8	P	0.000244	MG1655_sraB_b4418 SEG=NC_000913:+1145812,1145980 LEN=168
1763486_s_at	6536.7	P	0.000244	9142.9	P	0.000244	7924	P	0.000244	5794.1	P	0.000244	5880	P	0.000244	6990.9	P	0.000244	MG1655_yceD_b1088 DB_XREF=PID:g1787329 SEG=NC_000913:+1146017,1146538 LEN=521 DEF=orf, hypothetical protein
1767807_s_at	4663.1	P	0.000244	6121.4	P	0.000244	6687.7	P	0.001221	3370.8	P	0.001953	3370.5	P	0.001953	2771.1	P	0.001221	MG1655_rpmF_b1089 DB_XREF=PID:g1787330 SEG=NC_000913:+1146590,1146763 LEN=173 DEF=50S ribosomal subunit protein L32
1765839_s_at	3372.2	P	0.000244	2667.5	P	0.000244	1756.2	P	0.000244	1357.9	P	0.000244	1032.6	P	0.000244	1134.9	P	0.000244	MG1655_plsX_b1090 DB_XREF=PID:g1787331 SEG=NC_000913:+1146874,1147914 LEN=1040 DEF=glycerolphosphate auxotrophy in plsB background
1768901_s_at	3025.8	P	0.000244	2660.1	P	0.000244	1753.8	P	0.000244	1142.2	P	0.000244	1003.3	P	0.000244	1152.6	P	0.000244	MG1655_fabH_b1091 DB_XREF=PID:g1787333 SEG=NC_000913:+1147982,1148935 LEN=953 DEF=3-oxoacyl-(acyl-carrier-protein) synthase III; acetylCoA ACP transacylase
1762314_s_at	3907	P	0.000244	4560.9	P	0.000244	2862.2	P	0.000244	1896.1	P	0.000244	2295.6	P	0.000244	2357.3	P	0.000244	MG1655_fabD_b1092 DB_XREF=PID:g1787334 SEG=NC_000913:+1148951,1149880 LEN=929 DEF=malonyl-CoA-(acyl-carrier-protein) transacylase
1769115_s_at	3472.7	P	0.000244	5821.5	P	0.000244	4321.1	P	0.000244	3123.1	P	0.000244	3034.1	P	0.000244	3628.6	P	0.000244	MG1655_fabG_b1093 DB_XREF=PID:g1787335 SEG=NC_000913:+1149893,1150627 LEN=734 DEF=3-oxoacyl-(acyl-carrier-protein) reductase
1766568_s_at	6590.5	P	0.000244	10969.9	P	0.000244	7974.6	P	0.000244	7150.9	P	0.000244	8123.6	P	0.000244	9068.9	P	0.000244	MG1655_acpP_b1094 DB_XREF=PID:g1787336 SEG=NC_000913:+1150838,1151074 LEN=236 DEF=acyl carrier protein
1765464_s_at	3638.8	P	0.000244	3399.1	P	0.000244	2142.9	P	0.000244	1999.3	P	0.000244	1989.2	P	0.000244	2062	P	0.000244	MG1655_fabF_b1095 DB_XREF=PID:g1787337 SEG=NC_000913:+1151162,1152403 LEN=1241 DEF=3-oxoacyl-(acyl-carrier-protein) synthase II
1768017_s_at	599.7	P	0.000732	216.2	P	0.000732	232.7	P	0.00293	323.8	P	0.001221	211.1	P	0.00293	251.7	P	0.001221	MG1655_pabC_b1096 DB_XREF=PID:g1787338 SEG=NC_000913:+1152523,1153332 LEN=809 DEF=4-amino-4-deoxychorismate lyase
1759664_s_at	629	P	0.000244	239.1	P	0.001221	182.9	P	0.000244	299.4	P	0.000244	217.9	P	0.001221	288.3	P	0.000244	MG1655_yceG_b1097 DB_XREF=PID:g1787339 SEG=NC_000913:+1153335,1154357 LEN=1022 DEF=putative thymidylate kinase (EC 2.7.4.9)
1760848_s_at	1254.2	P	0.000244	743.6	P	0.001221	667.3	P	0.000732	638.1	P	0.001953	485	P	0.001953	436.8	P	0.001221	MG1655_tmk_b1098 DB_XREF=PID:g1787340 SEG=NC_000913:+1154347,1154988 LEN=641 DEF=thymidylate kinase
1760690_s_at	749.2	P	0.000244	434.7	P	0.000244	428.5	P	0.000244	306.6	P	0.000244	253.5	P	0.000244	245.2	P	0.000244	MG1655_holB_b1099 DB_XREF=PID:g1787341 SEG=NC_000913:+1154985,1155989 LEN=1004 DEF=DNA polymerase III, delta prime subunit
1766215_s_at	1097.9	P	0.000244	899.6	P	0.000244	615.5	P	0.000244	708.8	P	0.000244	416.7	P	0.000244	433	P	0.000244	MG1655_ycfH_b1100 DB_XREF=PID:g1787342 SEG=NC_000913:+1156000,1156797 LEN=797 DEF=orf, hypothetical protein
1762917_s_at	1404.5	P	0.000244	3451.6	P	0.000244	3184	P	0.000244	6187.1	P	0.000244	5709.8	P	0.000244	6709.9	P	0.000244	MG1655_ptsG_b1101 DB_XREF=PID:g1787343 SEG=NC_000913:+1157092,1158525 LEN=1433 DEF=PTS system, glucose-specific IIBC component
1766901_s_at	63.1	P	0.000244	59.3	P	0.000244	83.7	P	0.000244	71.6	P	0.000244	157.4	P	0.000244	147	P	0.000244	MG1655_fhuE_b1102 DB_XREF=PID:g1787344 SEG=NC_000913:-1158585,1160774 LEN=2189 DEF=outer membrane receptor for ferric iron uptake
1760031_s_at	576.4	P	0.000244	537.7	P	0.000244	574.1	P	0.000244	631.9	P	0.000244	576.4	P	0.000244	635.9	P	0.000244	MG1655_ycfF_b1103 DB_XREF=PID:g1787346 SEG=NC_000913:+1161108,1161467 LEN=359 DEF=orf, hypothetical protein
1761729_s_at	512.5	P	0.000244	378.2	P	0.000244	523.4	P	0.000244	468.9	P	0.000244	552.8	P	0.000244	432.8	P	0.000244	MG1655_ycfL_b1104 DB_XREF=PID:g1787347 SEG=NC_000913:+1161470,1161847 LEN=377 DEF=orf, hypothetical protein
1763610_s_at	740.1	P	0.000244	612.7	P	0.000244	479	P	0.000244	637.1	P	0.000244	691	P	0.000244	782.2	P	0.000244	MG1655_ycfM_b1105 DB_XREF=PID:g1787348 SEG=NC_000913:+1161861,1162502 LEN=641 DEF=orf, hypothetical protein
1767543_s_at	656.7	P	0.000244	480.5	P	0.000244	599.6	P	0.000244	383.9	P	0.000244	331.5	P	0.000244	411.3	P	0.000244	MG1655_ycfN_b1106 DB_XREF=PID:g1787349 SEG=NC_000913:+1162483,1163307 LEN=824 DEF=putative beta-glucosidase (EC 3.2.1.21)
1761973_s_at	838.7	P	0.000244	643.5	P	0.000244	647.3	P	0.000244	459.5	P	0.000244	422.2	P	0.000244	306.5	P	0.000244	MG1655_b1107 DB_XREF=PID:g1787350 SEG=NC_000913:+1163318,1164343 LEN=1025 DEF=hypothetical protein
1763416_s_at	1068.7	P	0.000244	1480.7	P	0.000244	1407.4	P	0.000244	1103.3	P	0.000244	1667.8	P	0.000244	1632.5	P	0.000244	MG1655_ycfP_b1108 DB_XREF=PID:g1787351 SEG=NC_000913:+1164309,1164908 LEN=599 DEF=orf, hypothetical protein
1764770_s_at	1927	P	0.000244	959.7	P	0.000244	999.7	P	0.000244	795.5	P	0.000244	1599.1	P	0.000244	1683.3	P	0.000244	MG1655_ndh_b1109 DB_XREF=PID:g1787352 SEG=NC_000913:+1165308,1166612 LEN=1304 DEF=respiratory NADH dehydrogenase
1763404_s_at	1501	P	0.000244	850.8	P	0.001221	777.6	P	0.00293	298.6	P	0.000732	413.7	P	0.001953	420.9	P	0.001221	MG1655_ycfJ_b1110 DB_XREF=PID:g1787353 SEG=NC_000913:+1166822,1167361 LEN=539 DEF=orf, hypothetical protein
1765941_s_at	736.5	P	0.000244	609.1	P	0.000244	671.7	P	0.000244	516.6	P	0.000244	1785.3	P	0.000244	1639.3	P	0.000244	MG1655_ycfQ_b1111 DB_XREF=PID:g1787354 SEG=NC_000913:-1167423,1168133 LEN=710 DEF=orf, hypothetical protein
1759494_s_at	2160.7	P	0.000244	1911.1	P	0.000244	1424.8	P	0.000244	119.4	P	0.000244	93.2	P	0.001953	62.9	P	0.010742	MG1655_ycfR_b1112 DB_XREF=PID:g1787355 SEG=NC_000913:+1168296,1168553 LEN=257 DEF=orf, hypothetical protein
1763718_s_at	1693.5	P	0.000244	314.8	P	0.00293	286.1	P	0.005859	813.6	P	0.000732	288.6	P	0.023926	247	P	0.00415	MG1655_ycfS_b1113 DB_XREF=PID:g1787356 SEG=NC_000913:-1168635,1169597 LEN=962 DEF=orf, hypothetical protein
1768082_s_at	596.1	P	0.000244	337.1	P	0.000244	422.1	P	0.000244	358.7	P	0.000244	425.5	P	0.000732	455.4	P	0.000244	MG1655_mfd_b1114 DB_XREF=PID:g1787357 SEG=NC_000913:-1169741,1173187 LEN=3446 DEF=transcription-repair coupling factor; mutation frequency decline
1763807_s_at	37.8	P	0.000732	33.5	P	0.046143	27.7	P	0.001221	61	P	0.001221	37.9	P	0.00293	28.9	P	0.008057	MG1655_ycfT_b1115 DB_XREF=PID:g1787359 SEG=NC_000913:-1173315,1174388 LEN=1073 DEF=orf, hypothetical protein
1760814_s_at	1282.5	P	0.000244	524.4	P	0.000244	611	P	0.000244	496.3	P	0.000244	378.5	P	0.000244	347	P	0.000244	MG1655_ycfU_b1116 DB_XREF=PID:g1787360 SEG=NC_000913:+1174650,1175849 LEN=1199 DEF=orf, hypothetical protein
1763444_s_at	1109.5	P	0.000244	425.6	P	0.000244	474.1	P	0.000244	446.6	P	0.000244	338.7	P	0.000244	346.3	P	0.000244	MG1655_ycfV_b1117 DB_XREF=PID:g1787361 SEG=NC_000913:+1175857,1176543 LEN=686 DEF=putative ATP-binding component of a transport system
1765853_s_at	1435.3	P	0.000244	840.7	P	0.000244	734.5	P	0.000244	775.4	P	0.000244	981.7	P	0.001221	787.9	P	0.001221	MG1655_ycfW_b1118 DB_XREF=PID:g1787362 SEG=NC_000913:+1176543,1177787 LEN=1244 DEF=putative kinase
1767767_s_at	1251	P	0.000244	706.2	P	0.000732	791	P	0.000732	913.4	P	0.000732	1066.5	P	0.000732	1023.4	P	0.000732	MG1655_ycfX_b1119 DB_XREF=PID:g1787363 SEG=NC_000913:+1177816,1178727 LEN=911 DEF=putative NAGC-like transcriptional regulator
1762576_s_at	827.8	P	0.000732	651.3	P	0.00293	628.3	P	0.00293	773.7	P	0.00415	830.9	P	0.005859	733.2	P	0.005859	MG1655_cobB_b1120 DB_XREF=PID:g1787364 SEG=NC_000913:+1178743,1179582 LEN=839 DEF=putative nicotinic acid mononucleotide:5,6-dimethylbenzimidazole (DMB) phosphoribosyltransferase
1766329_at	68.2	P	0.023926	94	P	0.01416	187	P	0.005859	111.2	P	0.010742	73.6	P	0.030273	40.4	M	0.056152	MG1655_ycfZ_b1121 DB_XREF=PID:g1787365 SEG=NC_000913:-1179702,1180490 LEN=788 DEF=homolog of virulence factor
1761226_s_at	104.8	P	0.000732	100.2	P	0.000732	151.2	P	0.000244	132	P	0.000244	77.7	P	0.000244	58	P	0.000732	MG1655_ymfA_b1122 DB_XREF=PID:g1787366 SEG=NC_000913:-1180487,1180957 LEN=470 DEF=orf, hypothetical protein
1768049_s_at	1233.8	P	0.000244	1339.2	P	0.000244	1014.2	P	0.000244	1048.1	P	0.000244	1388.7	P	0.000244	1434.3	P	0.000244	MG1655_potD_b1123 DB_XREF=PID:g1787367 SEG=NC_000913:-1181006,1182052 LEN=1046 DEF=spermidineputrescine periplasmic transport protein
1766747_s_at	1111.6	P	0.000244	479.9	P	0.000244	403.2	P	0.000244	397.3	P	0.000244	243.9	P	0.000732	184.1	P	0.000244	MG1655_potC_b1124 DB_XREF=PID:g1787368 SEG=NC_000913:-1182049,1182843 LEN=794 DEF=spermidineputrescine transport system permease
1768065_s_at	1462.7	P	0.000244	651.8	P	0.000244	588.5	P	0.000244	602	P	0.000244	392.4	P	0.000244	351	P	0.000244	MG1655_potB_b1125 DB_XREF=PID:g1787369 SEG=NC_000913:-1182840,1183667 LEN=827 DEF=spermidineputrescine transport system permease
1759599_s_at	1883.8	P	0.000244	863.3	P	0.000244	889.1	P	0.000244	838.6	P	0.000244	629.2	P	0.000244	654	P	0.000244	MG1655_potA_b1126 DB_XREF=PID:g1787370 SEG=NC_000913:-1183681,1184817 LEN=1136 DEF=ATP-binding component of spermidineputrescine transport
1766280_s_at	497.5	P	0.000244	398.2	P	0.000244	413	P	0.000244	368.1	P	0.000244	273	P	0.000244	202.7	P	0.000244	MG1655_pepT_b1127 DB_XREF=PID:g1787372 SEG=NC_000913:+1185067,1186293 LEN=1226 DEF=putative peptidase T
1762995_s_at	1473.3	P	0.000244	1134.3	P	0.000244	1032.2	P	0.000244	882	P	0.000244	769.5	P	0.000244	946.8	P	0.000244	MG1655_ycfD_b1128 DB_XREF=PID:g1787373 SEG=NC_000913:-1186342,1187472 LEN=1130 DEF=orf, hypothetical protein
1766276_s_at	396.9	P	0.000244	160.8	P	0.000244	241.4	P	0.000244	405.7	P	0.000244	602.4	P	0.000244	532.9	P	0.000244	MG1655_phoQ_b1129 DB_XREF=PID:g1787374 SEG=NC_000913:-1187539,1188999 LEN=1460 DEF=sensor protein PhoQ
1761628_s_at	648.2	P	0.000244	195	P	0.001953	319.2	P	0.00415	847.1	P	0.000244	1300.9	P	0.000244	1391.5	P	0.000244	MG1655_phoP_b1130 DB_XREF=PID:g1787375 SEG=NC_000913:-1188999,1189670 LEN=671 DEF=transcriptional regulatory protein
1767455_s_at	782.2	P	0.000732	781.7	P	0.000732	567.5	P	0.00415	555.3	P	0.005859	680.6	P	0.018555	832	P	0.00415	MG1655_purB_b1131 DB_XREF=PID:g1787376 SEG=NC_000913:-1189839,1191209 LEN=1370 DEF=adenylosuccinate lyase
1765395_s_at	1534.1	P	0.000244	886	P	0.000244	687.2	P	0.000244	647.8	P	0.000244	579.7	P	0.000244	502.8	P	0.000244	MG1655_ycfC_b1132 DB_XREF=PID:g1787377 SEG=NC_000913:-1191213,1191854 LEN=641 DEF=orf, hypothetical protein
1762726_s_at	1798	P	0.000244	831.2	P	0.000244	767.9	P	0.000244	1028.2	P	0.000244	781.7	P	0.000244	730.2	P	0.000244	MG1655_b1133 DB_XREF=PID:g1787378 SEG=NC_000913:-1191890,1193041 LEN=1151 DEF=hypothetical protein
1767276_s_at	315.6	P	0.000244	229.9	P	0.000244	196.9	P	0.000244	172.2	P	0.000244	119.9	P	0.000244	116.1	P	0.000244	MG1655_b1134 DB_XREF=PID:g1787379 SEG=NC_000913:-1193050,1193511 LEN=461 DEF=putative phosphohydrolase
1765469_s_at	377.8	P	0.000244	250.4	P	0.000244	320.2	P	0.000244	196.2	P	0.000244	150.2	P	0.000244	114.1	P	0.000244	CFT073_c1514 DB_XREF=26247383 SEG=NC_004431:-1395370,1395726 LEN=356 DEF=Hypothetical protein
1766843_s_at	1780.4	P	0.001221	6279.6	P	0.000244	4588.3	P	0.000244	5442	P	0.000244	5937.8	P	0.000244	7601.4	P	0.000244	MG1655_icdA_b1136 DB_XREF=PID:g1787381 SEG=NC_000913:+1194346,1195596 LEN=1250 DEF=isocitrate dehydrogenase, specific for NADP+
1763747_at	4.8	P	0.046143	3.2	A	0.19458	4.4	P	0.037598	5.7	P	0.010742	6.7	A	0.129639	7.3	P	0.008057	MG1655_ymfD_b1137 DB_XREF=PID:g1787383 SEG=NC_000913:-1196090,1196755 LEN=665 DEF=orf, hypothetical protein
1768766_at	2.4	A	0.149658	8.5	P	0.046143	7	A	0.095215	2.1	A	0.27417	7	A	0.095215	8.9	A	0.067627	MG1655_ymfE_b1138 DB_XREF=PID:g1787384 SEG=NC_000913:-1196756,1197460 LEN=704 DEF=orf, hypothetical protein
1759247_at	0.4	A	0.828613	0.6	A	0.696289	1	A	0.753906	2.7	A	0.72583	0.4	A	0.932373	0.6	A	0.845215	MG1655_lit_b1139 DB_XREF=PID:g1787385 SEG=NC_000913:+1197918,1198811 LEN=893 DEF=phage T4 late gene expression; at locus of e14 element
1765364_at	2.3	A	0.246094	7.2	A	0.067627	1.2	A	0.601074	6.4	A	0.19458	5.7	A	0.171387	9.4	A	0.095215	MG1655_intE_b1140 DB_XREF=PID:g1787386 SEG=NC_000913:-1198902,1200029 LEN=1127 DEF=prophage e14 integrase
1762326_at	0.3	A	0.888428	0.9	A	0.398926	1.8	A	0.828613	3.8	A	0.432373	2.7	A	0.567627	0.8	A	0.398926	MG1655_b1141 DB_XREF=PID:g1787387 SEG=NC_000913:-1200010,1200255 LEN=245 DEF=hypothetical protein
1762026_at	2.1	A	0.533936	7.9	A	0.432373	0.7	A	0.533936	1.8	A	0.466064	3.2	A	0.5	5.2	A	0.5	MG1655_ymfH_b1142 DB_XREF=PID:g1787388 SEG=NC_000913:-1200292,1200603 LEN=311 DEF=hypothetical protein
1761202_at	4.1	A	0.567627	1.2	A	0.888428	0.6	A	0.932373	1.4	A	0.850342	0.6	A	0.962402	1.6	A	0.888428	MG1655_ymfI_b1143 DB_XREF=PID:g1787389 SEG=NC_000913:+1200675,1201061 LEN=386 DEF=hypothetical protein
1766318_at	0.6	A	0.533936	0.7	A	0.798584	1.7	A	0.665527	0.5	A	0.665527	0.4	A	0.919434	3.6	A	0.601074	MG1655_ymfJ_b1144 DB_XREF=PID:g1787390 SEG=NC_000913:-1200999,1201283 LEN=284 DEF=hypothetical protein
1769176_at	2.6	A	0.303711	6.8	A	0.246094	3.9	A	0.398926	10.6	A	0.067627	6	A	0.303711	10.4	A	0.077148	MG1655_b1145 DB_XREF=PID:g1787391 SEG=NC_000913:-1201482,1202156 LEN=674 DEF=putative phage repressor
1767454_at	1.8	A	0.171387	0.3	A	0.870361	0.5	A	0.5	2.5	A	0.219482	5.7	P	0.017334	7.8	A	0.27417	MG1655_b1146 DB_XREF=PID:g1787392 SEG=NC_000913:+1201944,1202447 LEN=503 DEF=hypothetical protein
1761618_at	23.1	A	0.303711	27.8	A	0.366211	28	A	0.366211	47.7	A	0.067627	39.8	A	0.149658	53.8	A	0.080566	MG1655_ymfL_b1147 DB_XREF=PID:g1787393 SEG=NC_000913:+1202479,1203048 LEN=569 DEF=hypothetical protein
1763300_at	4.5	A	0.303711	11	A	0.111572	0.8	A	0.904785	0.9	A	0.850342	8.7	A	0.19458	1.4	A	0.567627	MG1655_ymfM_b1148 DB_XREF=PID:g1787394 SEG=NC_000913:+1203045,1203383 LEN=338 DEF=hypothetical protein
1768536_at	1.1	A	0.753906	0.7	A	0.943848	6.9	A	0.567627	7.2	A	0.567627	6	A	0.466064	3.6	A	0.665527	MG1655_ymfN_b1149 DB_XREF=PID:g1787395 SEG=NC_000913:+1203393,1204760 LEN=1367 DEF=hypothetical protein
1768594_at	7.1	A	0.466064	6.3	A	0.665527	6.8	A	0.567627	6.1	A	0.601074	2.3	A	0.850342	7.4	A	0.633789	MG1655_ymfR_b1150 DB_XREF=PID:g1787396 SEG=NC_000913:+1204772,1204954 LEN=182 DEF=hypothetical protein
1762840_at	1.1	A	0.5	9.5	A	0.334473	0.8	A	0.753906	0.9	A	0.601074	2.4	A	0.601074	1.3	A	0.665527	MG1655_ymfO_b1151 DB_XREF=PID:g1787397 SEG=NC_000913:+1204954,1205427 LEN=473 DEF=hypothetical protein
1767364_at	17.6	A	0.111572	22.6	A	0.080566	29.2	P	0.037598	6.7	A	0.533936	25	A	0.095215	13.8	A	0.19458	MG1655_b1152 DB_XREF=PID:g1787398 SEG=NC_000913:+1205354,1206145 LEN=791 DEF=hypothetical protein
1763407_at	23.8	A	0.095215	38.7	M	0.056152	28.4	P	0.046143	41.4	P	0.018555	45.2	A	0.067627	41	M	0.056152	MG1655_b1153 DB_XREF=PID:g1787399 SEG=NC_000913:+1206136,1206720 LEN=584 DEF=hypothetical protein
1759073_at	6.1	A	0.149658	3.6	A	0.303711	4.9	A	0.219482	10.5	A	0.080566	9.6	A	0.080566	17.3	P	0.037598	MG1655_ycfK_b1154 DB_XREF=PID:g1787400 SEG=NC_000913:+1206724,1207353 LEN=629 DEF=hypothetical protein
1766435_at	1.3	A	0.601074	0.6	A	0.976074	1.7	A	0.601074	1.8	A	0.366211	6.6	A	0.398926	5.1	A	0.358154	MG1655_b1155 DB_XREF=PID:g1787401 SEG=NC_000913:+1207355,1207768 LEN=413 DEF=hypothetical protein
1765500_at	3.9	A	0.356689	9.1	A	0.334473	9.1	A	0.149658	7.2	A	0.19458	5.2	A	0.334473	5.1	A	0.366211	MG1655_b1156 DB_XREF=PID:g1787402 SEG=NC_000913:-1207740,1208342 LEN=602 DEF=hypothetical protein
1760753_at	3	A	0.303711	2	A	0.334473	2.3	A	0.398926	12.9	A	0.171387	1.7	A	0.567627	13.3	A	0.219482	MG1655_b1157 DB_XREF=PID:g1787403 SEG=NC_000913:-1208342,1208881 LEN=539 DEF=putative tail fiber protein
1759938_at	1.5	A	0.303711	7.8	A	0.091553	4	A	0.171387	13.8	P	0.046143	8	A	0.171387	6.9	A	0.219482	MG1655_pin_b1158 DB_XREF=PID:g1787404 SEG=NC_000913:+1208908,1209462 LEN=554 DEF=inversion of adjacent DNA; at locus of e14 element
1766307_at	3.4	A	0.398926	7.5	A	0.27417	3.4	A	0.533936	0.5	A	0.780518	1.4	A	0.80542	0.6	A	0.533936	MG1655_mcrA_b1159 DB_XREF=PID:g1787406 SEG=NC_000913:+1209569,1210402 LEN=833 DEF=restriction of DNA at 5-methylcytosine residues; at locus of e14 element
1766279_at	36.4	P	0.000732	92.3	P	0.000244	117.1	P	0.000732	87	P	0.000244	166.9	P	0.000244	148.5	P	0.000732	MG1655_ycgW_b1160 DB_XREF=PID:g1787407 SEG=NC_000913:-1210903,1211226 LEN=323 DEF=orf, hypothetical protein
1760125_s_at	127.6	P	0.000732	160.7	P	0.000732	180.6	P	0.000244	137.4	P	0.000732	111	P	0.000244	82.1	P	0.000732	MG1655_ycgX_b1161 DB_XREF=PID:g1787408 SEG=NC_000913:-1211926,1212330 LEN=404 DEF=orf, hypothetical protein
1761578_s_at	1387.9	P	0.000244	1038.3	P	0.000244	1324.6	P	0.000244	1080.6	P	0.000244	754	P	0.000244	601.7	P	0.001953	MG1655_ycgE_b1162 DB_XREF=PID:g1787409 SEG=NC_000913:-1212551,1213282 LEN=731 DEF=putative transcriptional regulator
1762740_at	697.8	P	0.000244	721.9	P	0.000244	806.2	P	0.000244	1366.1	P	0.000244	1251	P	0.000244	1206.4	P	0.000244	MG1655_b1163 DB_XREF=PID:g1787410 SEG=NC_000913:-1213487,1214698 LEN=1211 DEF=orf, hypothetical protein
1762532_s_at	400	P	0.000732	323.6	P	0.001953	424.5	P	0.005859	348.8	P	0.001953	227.5	P	0.005859	203.5	P	0.00415	MG1655_ycgZ_b1164 DB_XREF=PID:g1787411 SEG=NC_000913:+1215012,1215248 LEN=236 DEF=orf, hypothetical protein
1769065_at	370	P	0.000244	218.7	P	0.000244	315	P	0.000244	225	P	0.000244	169	P	0.001953	167	P	0.000732	MG1655_ymgA_b1165 DB_XREF=PID:g1787412 SEG=NC_000913:+1215291,1215563 LEN=272 DEF=orf, hypothetical protein
1761703_s_at	119.2	P	0.000244	97.2	P	0.000244	64.9	P	0.000244	86.5	P	0.000244	39.6	P	0.000244	52.6	P	0.000244	MG1655_ymgB_b1166 DB_XREF=PID:g1787413 SEG=NC_000913:+1215592,1215858 LEN=266 DEF=orf, hypothetical protein
1767649_at	103.3	P	0.000244	46.1	P	0.000244	85.3	P	0.000244	120.1	P	0.000244	65	P	0.000244	51.2	P	0.000732	MG1655_ymgC_b1167 DB_XREF=PID:g1787414 SEG=NC_000913:+1215971,1216219 LEN=248 DEF=orf, hypothetical protein
1768167_at	39.1	P	0.000244	39.5	P	0.001953	19.5	P	0.000244	46.2	P	0.000244	30.6	P	0.000244	29.6	P	0.000732	MG1655_b1168 DB_XREF=PID:g1787415 SEG=NC_000913:+1216509,1218074 LEN=1565 DEF=putative proteases
1762681_at	44.1	P	0.000244	64.3	P	0.000244	64.5	P	0.000244	94.8	P	0.000244	75.3	P	0.000244	70.5	P	0.000244	MG1655_b1169 DB_XREF=PID:g1787416 SEG=NC_000913:+1218824,1220344 LEN=1520 DEF=putative ATP-binding component of a transport system
1768072_at	272.6	P	0.00415	182.5	P	0.008057	225.4	P	0.008057	299.8	P	0.000732	211.2	P	0.000732	200.1	P	0.001221	MG1655_b1170 DB_XREF=PID:g1787418 SEG=NC_000913:+1220429,1221445 LEN=1016 DEF=putative part of putative ATP-binding component of a transport system
1766969_s_at	341.9	P	0.000244	549.8	P	0.000244	707.7	P	0.000244	152.6	P	0.000244	141.8	P	0.000244	129.9	P	0.000244	MG1655_b1171 DB_XREF=PID:g1787419 SEG=NC_000913:-1221528,1221863 LEN=335 DEF=orf, hypothetical protein
1763277_s_at	497.6	P	0.000732	725.4	P	0.000732	874.4	P	0.001221	190.6	P	0.01416	199.6	P	0.018555	175.2	P	0.023926	MG1655_b1172 DB_XREF=PID:g1787420 SEG=NC_000913:-1221867,1222151 LEN=284 DEF=orf, hypothetical protein
1763523_s_at	397.5	P	0.000244	197.8	P	0.000244	260.2	P	0.000244	376.1	P	0.000244	288	P	0.000732	270.3	P	0.000732	MG1655_b1173 DB_XREF=PID:g1787421 SEG=NC_000913:+1222918,1223130 LEN=212 DEF=orf, hypothetical protein
1766899_s_at	508.9	P	0.000732	586.8	P	0.000244	598.2	P	0.000244	540	P	0.000244	523.5	P	0.000732	570	P	0.001221	MG1655_minE_b1174 DB_XREF=PID:g1787422 SEG=NC_000913:-1223502,1223768 LEN=266 DEF=cell division topological specificity factor, reverses MinC inhibition of ftsZ ring formation
1767749_s_at	1372.9	P	0.000244	2170.3	P	0.000244	2506.5	P	0.000244	1886.2	P	0.000244	1572.4	P	0.000244	1878.4	P	0.000244	MG1655_minD_b1175 DB_XREF=PID:g1787423 SEG=NC_000913:-1223772,1224584 LEN=812 DEF=cell division inhibitor, a membrane ATPase, activates minC
1761783_s_at	929.5	P	0.000244	1201.1	P	0.001221	1004.3	P	0.00415	1286	P	0.001221	1028.4	P	0.00415	1034.7	P	0.005859	MG1655_minC_b1176 DB_XREF=PID:g1787424 SEG=NC_000913:-1224608,1225303 LEN=695 DEF=cell division inhibitor, inhibits ftsZ ring formation
1766973_s_at	190.5	P	0.000732	329.3	P	0.000732	439.3	P	0.000244	293.3	P	0.000732	189.6	P	0.008057	155.3	P	0.005859	MG1655_ycgJ_b1177 DB_XREF=PID:g1787425 SEG=NC_000913:+1225823,1226191 LEN=368 DEF=orf, hypothetical protein
1763146_s_at	78.5	P	0.000244	278	P	0.000244	285.1	P	0.000244	263.6	P	0.000244	239.4	P	0.000244	230.8	P	0.000244	MG1655_ycgK_b1178 DB_XREF=PID:g1787426 SEG=NC_000913:-1226294,1226695 LEN=401 DEF=orf, hypothetical protein
1762884_s_at	558.7	P	0.000244	792.4	P	0.000244	830.4	P	0.000244	695.1	P	0.000244	609.3	P	0.000244	726.2	P	0.000244	MG1655_ycgL_b1179 DB_XREF=PID:g1787427 SEG=NC_000913:+1226904,1227230 LEN=326 DEF=orf, hypothetical protein
1766880_s_at	418.9	P	0.000244	361.2	P	0.000244	557.4	P	0.000244	467.1	P	0.000244	342.2	P	0.000244	397.7	P	0.000244	MG1655_b1180 DB_XREF=PID:g1787428 SEG=NC_000913:+1227302,1227961 LEN=659 DEF=putative isomerase
1759571_s_at	335.9	P	0.000244	205.4	P	0.000244	261.1	P	0.000244	246.2	P	0.000244	134.3	P	0.005859	140.6	P	0.001221	MG1655_ycgN_b1181 DB_XREF=PID:g1787429 SEG=NC_000913:+1228023,1228499 LEN=476 DEF=orf, hypothetical protein
1764155_s_at	47.8	P	0.000244	64.7	P	0.000244	100.1	P	0.000244	140.3	P	0.000244	88.2	P	0.000244	87.5	P	0.000244	MG1655_hlyE_b1182 DB_XREF=PID:g1787430 SEG=NC_000913:-1228706,1229623 LEN=917 DEF=hemolysin E
1764557_s_at	43.5	P	0.000732	29	P	0.010742	50.8	P	0.001953	69.1	P	0.000732	35.9	P	0.018555	25.4	P	0.037598	MG1655_umuD_b1183 DB_XREF=PID:g1787431 SEG=NC_000913:+1229990,1230409 LEN=419 DEF=SOS mutagenesis; error-prone repair; processed to UmuD; forms complex with UmuC
1760894_s_at	92.2	P	0.030273	52.9	A	0.111572	94.7	A	0.067627	97.9	P	0.008057	46.5	M	0.056152	53	A	0.067627	MG1655_umuC_b1184 DB_XREF=PID:g1787432 SEG=NC_000913:+1230409,1231677 LEN=1268 DEF=SOS mutagenesis and repair
1765550_s_at	987	P	0.000244	812.3	P	0.000244	686.8	P	0.000244	810.8	P	0.000244	1723.8	P	0.000244	1986.6	P	0.000244	MG1655_dsbB_b1185 DB_XREF=PID:g1787433 SEG=NC_000913:-1231723,1232253 LEN=530 DEF=reoxidizes DsbA protein following formation of disulfide bond in P-ring of flagella.
1759538_s_at	726.9	P	0.000244	413.8	P	0.000244	482	P	0.000244	327.9	P	0.000244	263.7	P	0.000244	236.6	P	0.000244	MG1655_nhaB_b1186 DB_XREF=PID:g1787435 SEG=NC_000913:-1232399,1233940 LEN=1541 DEF=Na+H+ antiporter, pH independent
1760637_s_at	1820.3	P	0.000244	1412.1	P	0.000244	1520.3	P	0.000244	1531.2	P	0.000244	1162.1	P	0.000244	1199.4	P	0.000244	MG1655_fadR_b1187 DB_XREF=PID:g1787436 SEG=NC_000913:+1234161,1234880 LEN=719 DEF=negative regulator for fad regulon, and positive activator of fabA
1765610_s_at	67.6	P	0.000244	38.2	P	0.000244	59.8	P	0.000244	147.3	P	0.000244	82.1	P	0.000244	78.8	P	0.000244	MG1655_ycgB_b1188 DB_XREF=PID:g1787437 SEG=NC_000913:-1234932,1236464 LEN=1532 DEF=putative sporulation protein
1759906_s_at	378.9	P	0.000244	278.2	P	0.000244	378.6	P	0.000244	2049	P	0.000244	1371.8	P	0.000244	1657.8	P	0.000244	MG1655_dadA_b1189 DB_XREF=PID:g1787438 SEG=NC_000913:+1236794,1238092 LEN=1298 DEF=D-amino acid dehydrogenase subunit
1764811_s_at	292.9	P	0.000244	307.4	P	0.000244	288.8	P	0.000244	1062.7	P	0.000244	742.2	P	0.000244	687.7	P	0.000244	MG1655_dadX_b1190 DB_XREF=PID:g1787439 SEG=NC_000913:+1238102,1239172 LEN=1070 DEF=alanine racemase 2, catabolic
1765314_at	142.6	P	0.000732	65.2	P	0.00293	90.3	P	0.001221	114.3	P	0.000244	63.6	P	0.000732	50.4	P	0.001953	MG1655_b1191 DB_XREF=PID:g1787440 SEG=NC_000913:-1239558,1241168 LEN=1610 DEF=hypothetical protein
1761771_s_at	343.5	P	0.000244	167	P	0.000244	164	P	0.000244	319.6	P	0.000244	244.8	P	0.000244	234.8	P	0.000244	MG1655_b1192 DB_XREF=PID:g1787441 SEG=NC_000913:-1241389,1242303 LEN=914 DEF=hypothetical protein
1761502_s_at	813.5	P	0.000244	643	P	0.000244	647.6	P	0.000244	416.6	P	0.000244	397.8	P	0.000244	464.9	P	0.000244	MG1655_mltE_b1193 DB_XREF=PID:g1787442 SEG=NC_000913:+1242289,1243014 LEN=725 DEF=murein transglycosylase E
1761277_s_at	56.2	P	0.000732	210.9	P	0.000732	301	P	0.000732	123	P	0.000732	537.7	P	0.000732	574.6	P	0.000244	MG1655_ycgR_b1194 DB_XREF=PID:g1787443 SEG=NC_000913:-1243016,1243750 LEN=734 DEF=orf, hypothetical protein
1761638_s_at	55.4	P	0.046143	45.5	A	0.080566	70	A	0.080566	101.9	P	0.037598	27.2	A	0.27417	24.4	A	0.27417	MG1655_ymgE_b1195 DB_XREF=PID:g1787445 SEG=NC_000913:+1243951,1244205 LEN=254 DEF=transglycosylase asociated protein
1761537_at	17.2	P	0.001953	17.3	P	0.010742	14.8	M	0.056152	29.6	P	0.000244	24.3	P	0.00415	15.9	A	0.129639	MG1655_ycgY_b1196 DB_XREF=PID:g1787446 SEG=NC_000913:+1244383,1244823 LEN=440 DEF=orf, hypothetical protein
1759084_s_at	80.1	P	0.000732	144.2	P	0.000244	152.2	P	0.000244	293.4	P	0.000244	69	P	0.000244	81.4	P	0.000244	EDL933_treA_Z1968 DB_XREF=GI:12514908 SEG=NC_002655:-1786041,1787498 LEN=1457 DEF=trehalase, periplasmic
1760957_s_at	989.3	P	0.000244	1704.1	P	0.000244	1382.1	P	0.000244	2830.3	P	0.000244	1155.1	P	0.000244	1249.8	P	0.000244	MG1655_b1198 DB_XREF=PID:g1787448 SEG=NC_000913:-1246919,1248340 LEN=1421 DEF=putative PTS system enzyme IIIAHPr
1765363_s_at	1076.8	P	0.000244	2064	P	0.000244	1544.2	P	0.000732	3638.4	P	0.000244	1730.9	P	0.000732	1951.4	P	0.000732	MG1655_b1199 DB_XREF=PID:g1787449 SEG=NC_000913:-1248348,1248980 LEN=632 DEF=putative dihydroxyacetone kinase
1764747_s_at	545.2	P	0.000244	991.7	P	0.000244	1031.6	P	0.000244	2752.2	P	0.000244	980.4	P	0.000244	948.9	P	0.000244	MG1655_b1200 DB_XREF=PID:g1787450 SEG=NC_000913:-1248991,1250091 LEN=1100 DEF=putative dihydroxyacetone kinase
1767634_s_at	211.3	P	0.000244	132.3	P	0.000244	180.8	P	0.000244	125.7	P	0.000244	117.5	P	0.000244	84.5	P	0.000244	MG1655_b1201 DB_XREF=PID:g1787451 SEG=NC_000913:+1250280,1252208 LEN=1928 DEF=putative sensor-type regulator
1768576_at	136.6	P	0.000244	91.7	P	0.00293	107.1	P	0.00293	85.2	P	0.000732	54.5	P	0.010742	55.7	P	0.008057	MG1655_b1202 DB_XREF=PID:g1787452 SEG=NC_000913:-1252308,1255175 LEN=2867 DEF=putative adhesion and penetration protein
1766974_s_at	2406.9	P	0.000244	1959.1	P	0.000244	1666	P	0.000244	1381	P	0.000244	1263.7	P	0.000244	1314.5	P	0.000244	MG1655_ychF_b1203 DB_XREF=PID:g1787454 SEG=NC_000913:-1255944,1257035 LEN=1091 DEF=putative GTP-binding protein
1765736_s_at	1014	P	0.000732	757.4	P	0.001221	549.9	P	0.000244	476.6	P	0.000244	527.5	P	0.000732	612.8	P	0.001221	MG1655_pth_b1204 DB_XREF=PID:g1787455 SEG=NC_000913:-1257152,1257736 LEN=584 DEF=peptidyl-tRNA hydrolase
1766739_s_at	169.9	P	0.000244	294.8	P	0.000244	566.8	P	0.000244	2401.9	P	0.000244	2186.3	P	0.000244	3069.3	P	0.000244	MG1655_ychH_b1205 DB_XREF=PID:g1787456 SEG=NC_000913:+1258014,1258292 LEN=278 DEF=orf, hypothetical protein
1762935_s_at	806.2	P	0.000244	220.7	P	0.001221	213.2	P	0.001221	281.9	P	0.000244	139	P	0.000244	141.1	P	0.000244	MG1655_ychM_b1206 DB_XREF=PID:g1787457 SEG=NC_000913:-1258347,1259999 LEN=1652 DEF=putative sulfate transporter
1762130_s_at	2394.9	P	0.000244	3307.7	P	0.000244	2918.6	P	0.000244	1530.4	P	0.000244	2068.2	P	0.000244	1990.4	P	0.000244	MG1655_prsA_b1207 DB_XREF=PID:g1787458 SEG=NC_000913:-1260151,1261098 LEN=947 DEF=phosphoribosylpyrophosphate synthetase
1763057_s_at	917.4	P	0.000244	390.2	P	0.000244	412.2	P	0.000244	412.6	P	0.000244	358.1	P	0.000244	354.1	P	0.000732	MG1655_b1208 DB_XREF=PID:g1787459 SEG=NC_000913:-1261249,1262100 LEN=851 DEF=hypothetical protein
1759842_s_at	1210.7	P	0.000244	676.7	P	0.000732	635.5	P	0.000244	779.3	P	0.000732	589	P	0.000732	542.9	P	0.000732	MG1655_hemM_b1209 DB_XREF=PID:g1787460 SEG=NC_000913:-1262100,1262723 LEN=623 DEF=outer-membrane lipoprotein
1765163_s_at	1959	P	0.000244	1007.3	P	0.000244	762.3	P	0.000244	692.9	P	0.000244	605.8	P	0.000244	580.5	P	0.000244	MG1655_hemA_b1210 DB_XREF=PID:g1787461 SEG=NC_000913:+1262937,1264193 LEN=1256 DEF=glutamyl-tRNA reductase
1767618_s_at	1647	P	0.000244	894.5	P	0.000244	671.7	P	0.000244	1000.2	P	0.000244	776.4	P	0.000244	797.2	P	0.000244	MG1655_prfA_b1211 DB_XREF=PID:g1787462 SEG=NC_000913:+1264235,1265317 LEN=1082 DEF=peptide chain release factor RF-1
1769056_s_at	1185.4	P	0.000244	516.8	P	0.000244	345	P	0.000244	384	P	0.000244	274.6	P	0.001953	226.7	P	0.001221	MG1655_hemK_b1212 DB_XREF=PID:g1787463 SEG=NC_000913:+1265317,1266150 LEN=833 DEF=possible protoporphyrinogen oxidase
1765390_s_at	1371.2	P	0.000244	1030.6	P	0.000244	969	P	0.000244	868.1	P	0.000244	772.5	P	0.000244	792.8	P	0.000244	MG1655_b1213 DB_XREF=PID:g1787464 SEG=NC_000913:+1266147,1266539 LEN=392 DEF=orf, hypothetical protein
1763973_s_at	1652.1	P	0.000244	801.5	P	0.000244	905.7	P	0.001221	967.3	P	0.000244	641.1	P	0.000732	813.9	P	0.000732	MG1655_ychA_b1214 DB_XREF=PID:g1787465 SEG=NC_000913:+1266543,1267352 LEN=809 DEF=orf, hypothetical protein
1764167_s_at	1333.8	P	0.000244	747.5	P	0.000244	750	P	0.000732	984.7	P	0.000244	765.4	P	0.000244	806.2	P	0.000244	MG1655_kdsA_b1215 DB_XREF=PID:g1787466 SEG=NC_000913:+1267388,1268242 LEN=854 DEF=2-dehydro-3-deoxyphosphooctulonate aldolase
1765715_x_at	998.5	P	0.000732	339.4	P	0.00293	433.6	P	0.001953	871.9	P	0.000732	541.5	P	0.001221	421.1	P	0.001953	MG1655_ldrA_b4419 SEG=NC_000913:-1268391,1268498 LEN=107 DEF=small toxic polypeptide
1760855_x_at	1175.9	P	0.000244	384.6	P	0.000244	304.4	P	0.000244	452.5	P	0.000244	365.9	P	0.000244	355.5	P	0.000244	MG1655_rdlA_b4420 SEG=NC_000913:+1268546,1268612 LEN=66 DEF=antisense RNA, trans-acting regulator of ldrA translation
1760490_x_at	693.9	P	0.000244	179.8	P	0.000244	215.6	P	0.000244	615.6	P	0.000244	378.5	P	0.000244	300.1	P	0.000244	MG1655_ldrB_b4421 SEG=NC_000913:-1268926,1269033 LEN=107 DEF=small toxic polypeptide
1767055_x_at	1000.6	P	0.000244	329.2	P	0.000244	272	P	0.000244	394.7	P	0.000244	231.6	P	0.000244	197.1	P	0.000244	MG1655_rdlB_b4422 SEG=NC_000913:+1269081,1269146 LEN=65 DEF=antisense RNA, trans-acting regulator of ldrB translation
1768021_x_at	1303.7	P	0.000244	364.6	P	0.000244	390	P	0.000244	331.5	P	0.000244	246.7	P	0.000244	221.2	P	0.000244	MG1655_rdlC_b4424 SEG=NC_000913:+1269616,1269683 LEN=67 DEF=antisense RNA, trans-acting regulator of ldrC translation
1768352_s_at	342.6	P	0.000244	102.2	P	0.000732	157.5	P	0.000244	288.7	P	0.000244	131.8	P	0.000732	131.6	P	0.000732	MG1655_chaA_b1216 DB_XREF=PID:g1787468 SEG=NC_000913:-1269972,1271072 LEN=1100 DEF=sodium-calciumproton antiporter
1762734_s_at	80.9	P	0.001221	33.2	A	0.171387	47.1	P	0.018555	93.4	P	0.001221	57.1	P	0.018555	53.3	P	0.018555	MG1655_chaB_b1217 DB_XREF=PID:g1787469 SEG=NC_000913:+1271342,1271572 LEN=230 DEF=cation transport regulator
1767356_s_at	686.5	P	0.000732	221.8	P	0.00293	270.2	P	0.001953	637.4	P	0.000732	365	P	0.001953	349.1	P	0.00415	MG1655_chaC_b1218 DB_XREF=PID:g1787470 SEG=NC_000913:+1271709,1272425 LEN=716 DEF=cation transport regulator
1765271_s_at	307.7	P	0.000244	402.5	P	0.000244	474.5	P	0.000244	939.9	P	0.000244	795.8	P	0.000244	771.6	P	0.000244	MG1655_ychN_b1219 DB_XREF=PID:g1787471 SEG=NC_000913:-1272469,1272822 LEN=353 DEF=orf, hypothetical protein
1768947_s_at	204.8	P	0.000244	137.7	P	0.000244	193.8	P	0.000244	231	P	0.000244	141.8	P	0.000732	99.2	P	0.000244	MG1655_ychP_b1220 DB_XREF=PID:g1787472 SEG=NC_000913:+1273148,1274401 LEN=1253 DEF=putative factor
1763350_s_at	695.5	P	0.000244	915.4	P	0.000244	759.4	P	0.000244	707.4	P	0.000244	634.8	P	0.000244	639	P	0.000244	MG1655_narL_b1221 DB_XREF=PID:g1787473 SEG=NC_000913:-1274402,1275052 LEN=650 DEF=pleiotrophic regulation of anaerobic respiration: response regulator for nar, frd, dms and tor genes
1759287_s_at	435.2	P	0.000244	226.7	P	0.000244	250.3	P	0.000244	323.1	P	0.000244	283.6	P	0.000244	251.3	P	0.000244	MG1655_narX_b1222 DB_XREF=PID:g1787474 SEG=NC_000913:-1275045,1276841 LEN=1796 DEF=nitratenitrate sensor, histidine protein kinase acts on NarL regulator
1764323_s_at	119	P	0.010742	148.9	P	0.023926	132.3	P	0.023926	120.6	P	0.023926	42.9	A	0.149658	39.1	A	0.27417	MG1655_narK_b1223 DB_XREF=PID:g1787475 SEG=NC_000913:+1277180,1278571 LEN=1391 DEF=nitrite extrusion protein
1760483_at	214	P	0.000244	63.9	P	0.001953	91.2	P	0.000732	146.3	P	0.000244	72.5	P	0.00415	51.3	P	0.00415	MG1655_narG_b1224 DB_XREF=PID:g1787477 SEG=NC_000913:+1279087,1282830 LEN=3743 DEF=nitrate reductase 1, alpha subunit
1763499_s_at	172.2	P	0.000244	95.4	P	0.00293	153.1	P	0.000732	163.6	P	0.000244	111.7	P	0.001953	72.9	P	0.018555	MG1655_narH_b1225 DB_XREF=PID:g1787478 SEG=NC_000913:+1282827,1284365 LEN=1538 DEF=nitrate reductase 1, beta subunit
1761649_s_at	132.7	P	0.001953	76.5	P	0.00415	106	P	0.00293	176.8	P	0.001953	72.3	P	0.037598	61.4	P	0.01416	MG1655_narJ_b1226 DB_XREF=PID:g1787479 SEG=NC_000913:+1284362,1285072 LEN=710 DEF=nitrate reductase 1, delta subunit, assembly function
1762880_s_at	74.9	P	0.00415	60.5	P	0.037598	95.3	P	0.018555	163.3	P	0.005859	96.1	P	0.005859	64	A	0.095215	MG1655_narI_b1227 DB_XREF=PID:g1787480 SEG=NC_000913:+1285072,1285749 LEN=677 DEF=nitrate reductase 1, cytochrome b(NR), gamma subunit
1764585_at	41.2	P	0.008057	42.8	P	0.00415	89.9	P	0.00415	84	P	0.00415	53.2	P	0.01416	58.6	P	0.046143	MG1655_b1228 DB_XREF=PID:g1787481 SEG=NC_000913:+1285932,1286207 LEN=275 DEF=orf, hypothetical protein
1765577_s_at	1466.8	P	0.001465	1134.8	P	0.003906	692.9	P	0.011719	459.5	P	0.037109	578.3	P	0.016113	532.1	P	0.02832	MG1655_tpr_b1229 DB_XREF=PID:g1787482 SEG=NC_000913:-1286310,1286411 LEN=101 DEF=a protaminelike protein
1761946_at	2086.2	P	0.000244	1913.8	P	0.000244	2324.2	P	0.000244	694.2	P	0.000244	882.4	P	0.000244	961.2	P	0.000244	MG1655_rtT_b4425 SEG=NC_000913:-1286289,1286459 LEN=170 DEF=rtT RNA; may modulate the stringent response
1761362_s_at	635.2	P	0.008057	632.1	P	0.00415	827.5	P	0.000732	789.1	P	0.00415	358.7	P	0.005859	394.9	P	0.00293	MG1655_purU_b1232 DB_XREF=PID:g1787483 SEG=NC_000913:-1287005,1287847 LEN=842 DEF=formyltetrahydrofolate deformylase; for purT-dependent FGAR synthesis
1764230_s_at	1302.4	P	0.000244	1399.6	P	0.000244	1901.8	P	0.000244	1667.8	P	0.000244	833.1	P	0.000244	986.7	P	0.000244	MG1655_ychJ_b1233 DB_XREF=PID:g1787484 SEG=NC_000913:-1287897,1288355 LEN=458 DEF=orf, hypothetical protein
1763603_s_at	868.4	P	0.001953	441.8	P	0.023926	579.9	P	0.00293	755.9	P	0.00293	466	P	0.018555	463.1	P	0.010742	MG1655_ychK_b1234 DB_XREF=PID:g1787485 SEG=NC_000913:+1288429,1289373 LEN=944 DEF=orf, hypothetical protein
1763324_s_at	362.9	P	0.000244	195.3	P	0.000244	230.1	P	0.000244	251.3	P	0.000244	152.2	P	0.001221	140.3	P	0.001953	MG1655_hnr_b1235 DB_XREF=PID:g1787487 SEG=NC_000913:+1289465,1290478 LEN=1013 DEF=Hnr protein
1765798_s_at	403.7	P	0.000244	847.2	P	0.000244	1073.4	P	0.000244	467.7	P	0.000244	262.6	P	0.000244	290.2	P	0.000244	MG1655_galU_b1236 DB_XREF=PID:g1787488 SEG=NC_000913:+1290680,1291588 LEN=908 DEF=glucose-1-phosphate uridylyltransferase
1759490_s_at	3467.7	P	0.000244	5776.9	P	0.000244	5868.4	P	0.000244	5167.8	P	0.000244	5375.3	P	0.000244	5627.8	P	0.000244	MG1655_hns_b1237 DB_XREF=PID:g1787489 SEG=NC_000913:-1291732,1292145 LEN=413 DEF=DNA-binding protein HLP-II (HU, BH2, HD, NS); pleiotropic regulator
1761210_s_at	428.1	P	0.000244	287.5	P	0.000244	677.5	P	0.000244	326.9	P	0.000244	173.4	P	0.000244	214.7	P	0.000244	MG1655_tdk_b1238 DB_XREF=PID:g1787490 SEG=NC_000913:+1292750,1293367 LEN=617 DEF=thymidine kinase
1762894_at	160.9	P	0.010742	102.1	P	0.046143	174	P	0.046143	174.1	P	0.023926	98.6	P	0.023926	83.8	P	0.023926	MG1655_ychG_b1239 DB_XREF=PID:g1787491 SEG=NC_000913:-1293649,1294239 LEN=590 DEF=orf, hypothetical protein
1764691_at	499.3	P	0.000244	262.7	P	0.000244	289.4	P	0.000244	424.7	P	0.000244	293.5	P	0.000244	243.2	P	0.000244	MG1655_b1240 DB_XREF=PID:g1787492 SEG=NC_000913:-1294191,1294421 LEN=230 DEF=orf, hypothetical protein
1767238_s_at	3703	P	0.000244	2440.5	P	0.000244	1752.1	P	0.000244	4564.9	P	0.000244	3817.9	P	0.000244	4529.8	P	0.000244	MG1655_adhE_b1241 DB_XREF=PID:g1787493 SEG=NC_000913:-1294669,1297344 LEN=2675 DEF=CoA-linked acetaldehyde dehydrogenase and iron-dependent alcohol dehydrogenase; pyruvate-formate-lyase deactivase
1764488_s_at	429.6	P	0.000244	229.7	P	0.000732	576.2	P	0.000732	313.5	P	0.001221	234.1	P	0.001953	234.2	P	0.00293	MG1655_ychE_b1242 DB_XREF=PID:g1787494 SEG=NC_000913:+1297821,1298468 LEN=647 DEF=putative channel protein
1764969_s_at	4513.1	P	0.000244	3785.3	P	0.000244	3013.4	P	0.000244	6012.4	P	0.000244	5599.1	P	0.000244	6255.9	P	0.000244	MG1655_oppA_b1243 DB_XREF=PID:g1787495 SEG=NC_000913:+1299206,1300837 LEN=1631 DEF=oligopeptide transport; periplasmic binding protein
1761726_s_at	2184.9	P	0.000244	1232	P	0.000244	796	P	0.000244	2568.4	P	0.000244	1097	P	0.000244	1299.5	P	0.000244	MG1655_oppB_b1244 DB_XREF=PID:g1787497 SEG=NC_000913:+1300923,1301843 LEN=920 DEF=oligopeptide transport permease protein
1765773_s_at	3210.5	P	0.000244	2186.4	P	0.000244	2049.1	P	0.000244	2594.6	P	0.000244	1283.2	P	0.000244	1427	P	0.000244	MG1655_oppC_b1245 DB_XREF=PID:g1787498 SEG=NC_000913:+1301858,1302766 LEN=908 DEF=homolog of Salmonella oligopeptide transport permease protein
1765783_s_at	3203.2	P	0.000244	1864.1	P	0.000244	1583.5	P	0.000244	1622.3	P	0.000244	966	P	0.000244	1146.1	P	0.000244	MG1655_oppD_b1246 DB_XREF=PID:g1787499 SEG=NC_000913:+1302778,1303791 LEN=1013 DEF=homolog of Salmonella ATP-binding protein of oligopeptide ABC transport system
1765513_s_at	2081.7	P	0.000244	969.5	P	0.000732	820.6	P	0.001221	750.3	P	0.001953	391.6	P	0.005859	445.9	P	0.005859	MG1655_oppF_b1247 DB_XREF=PID:g1787500 SEG=NC_000913:+1303788,1304792 LEN=1004 DEF=homolog of Salmonella ATP-binding protein of oligopeptide ABC transport system
1759304_s_at	886.1	P	0.000244	864.2	P	0.000244	846.1	P	0.000244	731	P	0.000244	528.9	P	0.000244	531.1	P	0.000244	EDL933_Z2024 DB_XREF=GI:12514970 SEG=NC_002655:-1841602,1841937 LEN=335 DEF=orf; Unknown function
1766472_s_at	549.2	P	0.000244	195	P	0.000244	257.6	P	0.000244	377.9	P	0.000244	275.6	P	0.000244	305.6	P	0.000244	MG1655_cls_b1249 DB_XREF=PID:g1787502 SEG=NC_000913:-1305209,1306669 LEN=1460 DEF=cardiolipin synthase, a major membrane phospholipid; novobiocin sensitivity
1764473_s_at	117.5	P	0.000244	157.6	P	0.000244	296.7	P	0.000244	168.7	P	0.000244	80.6	P	0.000244	49.7	P	0.000244	MG1655_kch_b1250 DB_XREF=PID:g1787503 SEG=NC_000913:-1307040,1308293 LEN=1253 DEF=putative potassium channel protein
1767224_s_at	1726.8	P	0.000244	2624.2	P	0.000244	2136.1	P	0.000244	2007.7	P	0.000244	2846.9	P	0.000244	2883.6	P	0.000244	MG1655_yciI_b1251 DB_XREF=PID:g1787504 SEG=NC_000913:-1308593,1308985 LEN=392 DEF=orf, hypothetical protein
1768707_s_at	730.6	P	0.000244	922.4	P	0.000244	822.2	P	0.000244	225.9	P	0.000244	704.3	P	0.000244	799.5	P	0.000244	MG1655_tonB_b1252 DB_XREF=PID:g1787505 SEG=NC_000913:+1309113,1309832 LEN=719 DEF=energy transducer; uptake of iron, cyanocobalimin; sensitivity to phages, colicins
1767581_s_at	1375.8	P	0.000244	993.4	P	0.000244	1267.5	P	0.000244	837.9	P	0.000244	576.7	P	0.000244	649	P	0.000244	MG1655_yciA_b1253 DB_XREF=PID:g1787506 SEG=NC_000913:-1309872,1310270 LEN=398 DEF=orf, hypothetical protein
1760701_s_at	2381.1	P	0.000244	1132.4	P	0.000244	1583.4	P	0.000244	1316.1	P	0.000244	1115.9	P	0.000244	1049.3	P	0.000244	MG1655_ispZ_b1254 DB_XREF=PID:g1787507 SEG=NC_000913:-1310375,1310914 LEN=539 DEF=hypothetical protein
1767071_s_at	2045.6	P	0.000244	1047.7	P	0.000244	991.6	P	0.000244	1127.5	P	0.000244	527.5	P	0.000244	580.1	P	0.000244	MG1655_yciC_b1255 DB_XREF=PID:g1787508 SEG=NC_000913:-1310944,1311687 LEN=743 DEF=orf, hypothetical protein
1763696_s_at	169.4	P	0.00415	304.4	P	0.000732	381.7	P	0.000732	745.8	P	0.000732	538.6	P	0.000732	660.4	P	0.000732	MG1655_yciD_b1256 DB_XREF=PID:g1787510 SEG=NC_000913:+1312044,1312682 LEN=638 DEF=putative outer membrane protein
1768587_s_at	58.9	P	0.000244	48.1	P	0.001953	56.3	P	0.000244	133.1	P	0.000244	79.3	P	0.000244	61.7	P	0.000244	MG1655_yciE_b1257 DB_XREF=PID:g1787511 SEG=NC_000913:-1312742,1313248 LEN=506 DEF=orf, hypothetical protein
1762401_s_at	19.6	P	0.00415	34	P	0.001221	54.4	P	0.001953	112.8	P	0.000244	76.9	P	0.000244	64	P	0.000244	MG1655_yciF_b1258 DB_XREF=PID:g1787512 SEG=NC_000913:-1313294,1313794 LEN=500 DEF=putative structural proteins
1761873_s_at	33.3	A	0.219482	81.2	P	0.046143	98.3	P	0.01416	127.3	P	0.010742	119.1	P	0.046143	90.7	P	0.037598	MG1655_yciG_b1259 DB_XREF=PID:g1787513 SEG=NC_000913:-1313880,1314116 LEN=236 DEF=orf, hypothetical protein
1767766_s_at	343	P	0.000244	274.7	P	0.001953	250.5	P	0.000732	1340.8	P	0.000244	2038.8	P	0.000244	2216.5	P	0.000244	MG1655_trpA_b1260 DB_XREF=PID:g1787514 SEG=NC_000913:-1314440,1315246 LEN=806 DEF=tryptophan synthase, alpha protein
1764429_s_at	281.7	P	0.000244	254.6	P	0.000244	214.2	P	0.000244	1568.7	P	0.000244	1698.7	P	0.000244	1989.5	P	0.000244	MG1655_trpB_b1261 DB_XREF=PID:g1787515 SEG=NC_000913:-1315246,1316439 LEN=1193 DEF=tryptophan synthase, beta protein
1759806_s_at	448.8	P	0.000732	336.4	P	0.000732	300.4	P	0.000244	1018.9	P	0.000244	1110.8	P	0.000244	1338.7	P	0.000244	MG1655_trpC_b1262 DB_XREF=PID:g1787516 SEG=NC_000913:-1316451,1317812 LEN=1361 DEF=N-(5-phosphoribosyl)anthranilate isomerase and indole-3-glycerolphosphate synthetase
1759337_s_at	47.4	A	0.171387	41.1	A	0.27417	41.2	A	0.219482	294.3	P	0.018555	179.2	P	0.023926	198.6	P	0.030273	MG1655_trpD_b1263 DB_XREF=PID:g1787517 SEG=NC_000913:-1317813,1319408 LEN=1595 DEF=anthranilate synthase component II, glutamine amidotransferase and phosphoribosylanthranilate transferase
1769208_at	39.3	A	0.080566	31.5	A	0.111572	71.3	A	0.067627	350	P	0.001953	170.1	P	0.010742	139.9	P	0.023926	MG1655_trpE_b1264 DB_XREF=PID:g1787518 SEG=NC_000913:-1319408,1320970 LEN=1562 DEF=anthranilate synthase component I
1768504_s_at	46.3	A	0.073242	69.6	M	0.056641	116.5	A	0.073242	346.1	P	0.000977	354.1	P	0.00293	319	P	0.000977	MG1655_trpL_b1265 DB_XREF=PID:g1787519 SEG=NC_000913:-1321062,1321106 LEN=44 DEF=trp operon leader peptide
1763626_s_at	561.3	P	0.000244	509.5	P	0.000244	603.2	P	0.000244	386.3	P	0.000244	386.1	P	0.000732	307	P	0.00293	MG1655_yciV_b1266 DB_XREF=PID:g1787520 SEG=NC_000913:+1321244,1322125 LEN=881 DEF=putative enzymes
1762494_s_at	516.3	P	0.000244	609.5	P	0.000244	603.5	P	0.000244	497.3	P	0.000244	458.4	P	0.000244	532	P	0.000244	MG1655_yciO_b1267 DB_XREF=PID:g1787521 SEG=NC_000913:+1322086,1322742 LEN=656 DEF=orf, hypothetical protein
1764479_at	91.3	P	0.000244	62.5	P	0.001953	157.5	P	0.000732	127.9	P	0.000244	88	P	0.001221	65.2	P	0.000732	MG1655_yciQ_b1268 DB_XREF=PID:g1787522 SEG=NC_000913:+1322770,1324665 LEN=1895 DEF=orf, hypothetical protein
1761441_s_at	3542.7	P	0.000244	2186.4	P	0.000244	1724	P	0.000244	1700.1	P	0.000244	1340.5	P	0.000244	1465.5	P	0.000244	MG1655_yciL_b1269 DB_XREF=PID:g1787524 SEG=NC_000913:+1324876,1325751 LEN=875 DEF=orf, hypothetical protein
1764319_s_at	386.4	P	0.000244	306.4	P	0.000244	426.2	P	0.000244	357.6	P	0.000244	386.7	P	0.000244	333.6	P	0.000244	MG1655_btuR_b1270 DB_XREF=PID:g1787525 SEG=NC_000913:-1325791,1326381 LEN=590 DEF=cob(I)alamin adenolsyltransferase
1768404_s_at	350.4	P	0.000244	271.3	P	0.000732	320.8	P	0.000244	314.7	P	0.000244	361.8	P	0.000732	345	P	0.000244	MG1655_yciK_b1271 DB_XREF=PID:g1787526 SEG=NC_000913:-1326378,1327136 LEN=758 DEF=putative oxidoreductase
1765108_s_at	1273.3	P	0.000244	1747.4	P	0.000244	1490.1	P	0.000244	1212.4	P	0.000244	1174.5	P	0.000244	1322.4	P	0.000244	MG1655_sohB_b1272 DB_XREF=PID:g1787527 SEG=NC_000913:+1327356,1328405 LEN=1049 DEF=putative protease
1763542_s_at	3117	P	0.000244	4936.5	P	0.000244	4282.8	P	0.000244	1989	P	0.000244	1818.7	P	0.000244	1946	P	0.000244	MG1655_yciN_b1273 DB_XREF=PID:g1787528 SEG=NC_000913:-1328441,1328692 LEN=251 DEF=orf, hypothetical protein
1763143_s_at	2934.8	P	0.000244	1816.5	P	0.000244	1445	P	0.000244	1736.2	P	0.000244	1626.6	P	0.000244	1646.4	P	0.000244	MG1655_topA_b1274 DB_XREF=PID:g1787529 SEG=NC_000913:+1329072,1331669 LEN=2597 DEF=DNA topoisomerase type I, omega protein
1765835_s_at	1429.2	P	0.000244	512.4	P	0.000244	805.4	P	0.000244	770.9	P	0.000244	699.7	P	0.000244	781.3	P	0.000244	MG1655_cysB_b1275 DB_XREF=PID:g1787530 SEG=NC_000913:+1331879,1332853 LEN=974 DEF=positive transcriptional regulator for cysteine regulon
1760881_s_at	186.1	P	0.000244	248.3	P	0.000244	226.8	P	0.000732	642.9	P	0.000244	660.1	P	0.000244	885.2	P	0.000244	MG1655_acnA_b1276 DB_XREF=PID:g1787531 SEG=NC_000913:+1333855,1336530 LEN=2675 DEF=aconitate hydrase 1
1763188_s_at	1117.7	P	0.000244	1348.3	P	0.000244	1131.8	P	0.000244	993.5	P	0.000244	1005.6	P	0.000244	902.5	P	0.000244	MG1655_ribA_b1277 DB_XREF=PID:g1787533 SEG=NC_000913:-1336594,1337184 LEN=590 DEF=GTP cyclohydrolase II
1766437_s_at	384	P	0.000244	192.1	P	0.000244	218.6	P	0.001221	224.7	P	0.000244	265	P	0.000732	186.5	P	0.000244	MG1655_pgpB_b1278 DB_XREF=PID:g1787534 SEG=NC_000913:+1337354,1338118 LEN=764 DEF=non-essential phosphatidylglycerophosphate phosphatase, membrane bound
1762706_s_at	2561	P	0.000244	991.5	P	0.000244	970.2	P	0.000244	1970.5	P	0.000244	1720.6	P	0.000244	1821	P	0.000244	MG1655_yciS_b1279 DB_XREF=PID:g1787535 SEG=NC_000913:+1338267,1338575 LEN=308 DEF=orf, hypothetical protein
1768989_s_at	1123.2	P	0.000244	380.4	P	0.000244	407.4	P	0.000244	562.7	P	0.000244	483.9	P	0.000244	509.6	P	0.000244	MG1655_yciM_b1280 DB_XREF=PID:g2367116 SEG=NC_000913:+1338582,1339751 LEN=1169 DEF=putative heat shock protein
1759799_s_at	580.2	P	0.000244	617.4	P	0.000244	596.3	P	0.000244	381.6	P	0.000244	248.1	P	0.000244	242.5	P	0.000244	MG1655_pyrF_b1281 DB_XREF=PID:g1787537 SEG=NC_000913:+1339945,1340682 LEN=737 DEF=orotidine-5-phosphate decarboxylase
1765372_s_at	751.3	P	0.000244	1065.1	P	0.000732	1157.3	P	0.000732	484.7	P	0.000732	478.2	P	0.000732	481.7	P	0.000732	CFT073_yciH_c1751 DB_XREF=26247615 SEG=NC_004431:+1586948,1587277 LEN=329 DEF=Protein yciH
1759179_s_at	725	P	0.000244	1852.3	P	0.000244	1716.6	P	0.000244	347.1	P	0.000244	314.6	P	0.000244	339.1	P	0.000244	MG1655_osmB_b1283 DB_XREF=PID:g1787539 SEG=NC_000913:-1341134,1341352 LEN=218 DEF=osmotically inducible lipoprotein
1763845_s_at	602.2	P	0.000244	169.5	P	0.000244	288.3	P	0.000244	342.3	P	0.000732	360.1	P	0.000244	343.5	P	0.000732	MG1655_b1284 DB_XREF=PID:g1787540 SEG=NC_000913:-1341621,1342370 LEN=749 DEF=putative DEOR-type transcriptional regulator
1762888_s_at	93	P	0.00415	28.1	A	0.19458	63.3	P	0.037598	115.5	P	0.00293	61.5	P	0.010742	42.4	P	0.01416	MG1655_yciR_b1285 DB_XREF=PID:g1787541 SEG=NC_000913:-1342781,1344766 LEN=1985 DEF=orf, hypothetical protein
1761544_s_at	1290.2	P	0.000244	980.2	P	0.000244	924.9	P	0.000244	1000.5	P	0.000244	636.1	P	0.000732	649.5	P	0.000732	MG1655_rnb_b1286 DB_XREF=PID:g1787542 SEG=NC_000913:-1345002,1346936 LEN=1934 DEF=RNase II, mRNA degradation
1760255_s_at	41.7	P	0.005859	43.6	P	0.018555	59.8	P	0.01416	442.8	P	0.000244	190.3	P	0.000244	177.6	P	0.000244	MG1655_yciW_b1287 DB_XREF=PID:g1787544 SEG=NC_000913:-1347004,1348209 LEN=1205 DEF=putative oxidoreductase
1764582_s_at	2426	P	0.000244	4511.6	P	0.000244	3328.2	P	0.000244	2017.7	P	0.000244	2431.7	P	0.000244	3016.4	P	0.000244	MG1655_fabI_b1288 DB_XREF=PID:g1787545 SEG=NC_000913:-1348275,1349063 LEN=788 DEF=enoyl-(acyl-carrier-protein) reductase (NADH)
1760375_at	269.7	P	0.000244	188	P	0.000244	203.2	P	0.000244	394	P	0.000244	337.3	P	0.000244	304.2	P	0.000244	MG1655_ycjD_b1289 DB_XREF=PID:g1787546 SEG=NC_000913:-1349431,1349784 LEN=353 DEF=orf, hypothetical protein
1767578_s_at	244.2	P	0.000244	154.8	P	0.000244	194.4	P	0.001953	144.3	P	0.001221	128.1	P	0.000244	117	P	0.000732	MG1655_sapF_b1290 DB_XREF=PID:g1787547 SEG=NC_000913:-1349852,1350658 LEN=806 DEF=putative ATP-binding protein of peptide transport system
1768601_s_at	344.4	P	0.000244	283.1	P	0.001953	331.8	P	0.001953	310.2	P	0.001221	246.8	P	0.00293	246	P	0.00293	MG1655_sapD_b1291 DB_XREF=PID:g1787548 SEG=NC_000913:-1350660,1351652 LEN=992 DEF=putative ATP-binding protein of peptide transport system
1763317_s_at	161.7	P	0.000732	91.2	P	0.000244	112.8	P	0.000732	154.9	P	0.001221	95.3	P	0.000732	61.3	P	0.000732	MG1655_sapC_b1292 DB_XREF=PID:g1787549 SEG=NC_000913:-1351652,1352542 LEN=890 DEF=homolog of Salmonella peptide transport permease protein
1766461_s_at	297.1	P	0.000732	101	P	0.005859	135.5	P	0.000732	184.5	P	0.001221	130.1	P	0.018555	88	P	0.037598	MG1655_sapB_b1293 DB_XREF=PID:g1787550 SEG=NC_000913:-1352529,1353494 LEN=965 DEF=homolog of Salmonella peptide transport permease protein
1762238_s_at	547.4	P	0.000244	206.8	P	0.000732	265	P	0.000244	260	P	0.000244	234.2	P	0.000244	180.9	P	0.000732	MG1655_sapA_b1294 DB_XREF=PID:g1787551 SEG=NC_000913:-1353491,1355134 LEN=1643 DEF=homolog of Salmonella peptide transport periplasmic protein
1759618_s_at	610.4	P	0.000244	341.6	P	0.000244	461.6	P	0.000244	407.1	P	0.000244	389	P	0.000244	336.1	P	0.000244	MG1655_ymjA_b1295 DB_XREF=PID:g1787552 SEG=NC_000913:-1355447,1355692 LEN=245 DEF=orf, hypothetical protein
1768578_at	124.6	P	0.001221	62.4	P	0.046143	101.8	P	0.010742	367.2	P	0.000244	305.3	P	0.000732	271.6	P	0.000732	MG1655_ycjJ_b1296 DB_XREF=PID:g1787553 SEG=NC_000913:-1355826,1357265 LEN=1439 DEF=putative amino acidamine transport protein
1768241_s_at	230.9	P	0.000732	220.1	P	0.001953	314.3	P	0.008057	567.9	P	0.000244	535.7	P	0.00415	519.5	P	0.00415	SAKAI_ECs1874 DB_XREF=38703959 SEG=NC_002695:-1867423,1868841 LEN=1418 DEF=putative glutamine synthetase
1761141_s_at	169.9	P	0.000244	238.6	P	0.000244	283.5	P	0.000732	485.7	P	0.000244	493.7	P	0.000244	395.2	P	0.000244	MG1655_ycjL_b1298 DB_XREF=PID:g1787556 SEG=NC_000913:+1359132,1359908 LEN=776 DEF=probable amidotransferase subunit
1766208_s_at	244.8	P	0.000244	196	P	0.000244	223.3	P	0.000244	432.7	P	0.000244	431.9	P	0.000244	380	P	0.000244	MG1655_ycjC_b1299 DB_XREF=PID:g1787557 SEG=NC_000913:+1359935,1360492 LEN=557 DEF=orf, hypothetical protein
1764174_s_at	98.5	P	0.005859	109.3	P	0.018555	128.7	P	0.018555	494.3	P	0.000244	451	P	0.000732	471.9	P	0.000244	MG1655_aldH_b1300 DB_XREF=PID:g1787558 SEG=NC_000913:+1360767,1362254 LEN=1487 DEF=aldehyde dehydrogenase, prefers NADP over NAD
1764658_at	64.2	P	0.000244	48.7	P	0.000732	103.5	P	0.000732	317	P	0.000244	230.7	P	0.000244	271.6	P	0.000244	MG1655_ordL_b1301 DB_XREF=PID:g1787559 SEG=NC_000913:+1362256,1363536 LEN=1280 DEF=probable oxidoreductase
1766158_at	53.6	P	0.000244	61.3	P	0.01416	100	P	0.001953	181	P	0.000244	200.4	P	0.000244	176.9	P	0.001221	MG1655_goaG_b1302 DB_XREF=PID:g1787560 SEG=NC_000913:+1363574,1364839 LEN=1265 DEF=4-aminobutyrate aminotransferase
1765938_s_at	122	P	0.023926	112.2	M	0.056152	184.9	P	0.005859	139.2	P	0.008057	164.5	P	0.018555	129.9	P	0.010742	MG1655_pspF_b1303 DB_XREF=PID:g1787561 SEG=NC_000913:-1364959,1365951 LEN=992 DEF=psp operon transcriptional activator
1769101_s_at	703.1	P	0.000244	380.2	P	0.000244	277	P	0.010742	1169.2	P	0.000244	376.8	P	0.000244	442.7	P	0.000244	MG1655_pspA_b1304 DB_XREF=PID:g2367118 SEG=NC_000913:+1366103,1366771 LEN=668 DEF=phage shock protein, inner membrane protein
1768435_s_at	913.7	P	0.000244	426.9	P	0.000244	485.7	P	0.000244	1609.3	P	0.000244	716.3	P	0.000244	731	P	0.000244	MG1655_pspB_b1305 DB_XREF=PID:g1787563 SEG=NC_000913:+1366825,1367049 LEN=224 DEF=phage shock protein
1762530_s_at	541.8	P	0.000244	273.3	P	0.000244	403.8	P	0.000244	1001.1	P	0.000244	447.9	P	0.000732	426.3	P	0.000732	MG1655_pspC_b1306 DB_XREF=PID:g1787564 SEG=NC_000913:+1367049,1367408 LEN=359 DEF=phage shock protein: activates phage shock-protein expression
1765796_s_at	471.9	P	0.000732	285.2	P	0.001221	287.4	P	0.000244	922	P	0.000244	398.8	P	0.001221	385	P	0.001221	MG1655_pspD_b1307 DB_XREF=PID:g1787565 SEG=NC_000913:+1367417,1367638 LEN=221 DEF=phage shock protein
1760618_s_at	465.3	P	0.000244	1027.6	P	0.000244	862.6	P	0.000244	2514.5	P	0.000244	2698.9	P	0.000244	2850.8	P	0.000244	MG1655_pspE_b1308 DB_XREF=PID:g1787567 SEG=NC_000913:+1367713,1368027 LEN=314 DEF=phage shock protein
1767409_at	24.1	P	0.030273	28.4	P	0.008057	85.4	P	0.001953	79.7	P	0.000244	58.1	P	0.000732	45.9	P	0.001953	MG1655_ycjM_b1309 DB_XREF=PID:g1787568 SEG=NC_000913:+1368213,1369919 LEN=1706 DEF=putative polysaccharide hydrolase
1760115_at	9.6	P	0.00415	21	P	0.001953	46.8	P	0.000244	55.3	P	0.001221	40.6	P	0.000244	20	P	0.000244	MG1655_b1310 DB_XREF=PID:g1787569 SEG=NC_000913:+1369933,1371225 LEN=1292 DEF=putative transport periplasmic protein
1759289_s_at	18.5	A	0.213379	29.8	A	0.219482	54.4	A	0.149658	73.5	M	0.056152	39.1	A	0.149658	26	A	0.303711	MG1655_ycjO_b1311 DB_XREF=PID:g1787570 SEG=NC_000913:+1371246,1372127 LEN=881 DEF=putative binding-protein dependent transport protein
1769068_s_at	17.5	P	0.023926	26.1	P	0.005859	38.4	P	0.00293	85.6	P	0.000244	51.1	P	0.005859	34.8	P	0.000244	MG1655_ycjP_b1312 DB_XREF=PID:g1787571 SEG=NC_000913:+1372114,1372956 LEN=842 DEF=putative transport system permease protein
1760206_s_at	38.4	P	0.000244	39.4	P	0.000244	50.9	P	0.000244	81.7	P	0.000244	62.8	P	0.000244	49.9	P	0.00293	MG1655_ycjQ_b1313 DB_XREF=PID:g1787572 SEG=NC_000913:+1372987,1374039 LEN=1052 DEF=putative oxidoreductase
1762563_s_at	34.6	P	0.010742	64.8	P	0.010742	74.8	P	0.000732	92.6	P	0.000244	62.8	P	0.000732	69.1	P	0.001221	MG1655_b1314 DB_XREF=PID:g1787573 SEG=NC_000913:+1374049,1374846 LEN=797 DEF=putative transient receptor potential locus
1767412_s_at	55.6	P	0.000244	92.7	P	0.00415	96.8	P	0.000732	154.7	P	0.000244	105.5	P	0.001221	167.8	P	0.005859	MG1655_ycjS_b1315 DB_XREF=PID:g1787574 SEG=NC_000913:+1374856,1375911 LEN=1055 DEF=putative dehydrogenase
1763624_s_at	22.3	A	0.095215	43	A	0.067627	35.6	M	0.056152	37.8	P	0.005859	31.2	P	0.01416	29.4	A	0.111572	MG1655_ycjT_b1316 DB_XREF=PID:g1787575 SEG=NC_000913:+1375908,1378175 LEN=2267 DEF=orf, hypothetical protein
1766484_at	11.9	A	0.129639	18.5	A	0.111572	26.9	P	0.001953	48.2	P	0.001221	30.2	A	0.144531	14.3	A	0.533936	MG1655_ycjU_b1317 DB_XREF=PID:g1787576 SEG=NC_000913:+1378172,1378831 LEN=659 DEF=putative beta-phosphoglucomutase
1760340_s_at	3.3	A	0.633789	25.4	A	0.533936	32.1	A	0.334473	52.5	A	0.366211	42.1	A	0.466064	31.6	A	0.567627	MG1655_ycjV_b1318 DB_XREF=PID:g1787577 SEG=NC_000913:+1378845,1379813 LEN=968 DEF=putative ATP-binding component of a transport system
1765650_s_at	16.9	A	0.219482	28.5	P	0.023926	55.6	P	0.037598	87.4	P	0.01416	57.9	M	0.056152	30	P	0.046143	CFT073_ompG_c1791 DB_XREF=26247655 SEG=NC_004431:+1624577,1625533 LEN=956 DEF=Outer membrane protein G precursor
1759133_s_at	64.4	P	0.008057	78.6	P	0.000732	92.2	P	0.001221	115.2	P	0.001221	88	P	0.00293	44.9	P	0.00415	MG1655_ycjW_b1320 DB_XREF=PID:g1787580 SEG=NC_000913:-1380987,1381985 LEN=998 DEF=putative LACI-type transcriptional regulator
1768270_s_at	747.3	P	0.000732	221.8	P	0.023926	202	P	0.018555	352.7	P	0.010742	403.5	P	0.008057	411	P	0.010742	MG1655_ycjX_b1321 DB_XREF=PID:g1787581 SEG=NC_000913:+1382141,1383538 LEN=1397 DEF=putative EC 2.1 enzymes
1765041_s_at	411.2	P	0.000244	112.1	P	0.000244	99.9	P	0.000732	202	P	0.000732	156.3	P	0.001221	156.3	P	0.000732	MG1655_ycjF_b1322 DB_XREF=PID:g1787582 SEG=NC_000913:+1383535,1384596 LEN=1061 DEF=orf, hypothetical protein
1762156_s_at	618.3	P	0.000244	327.2	P	0.000244	556.6	P	0.000244	404.2	P	0.000244	487.7	P	0.000244	367	P	0.000244	MG1655_tyrR_b1323 DB_XREF=PID:g1787583 SEG=NC_000913:+1384744,1386285 LEN=1541 DEF=transcriptional regulation of aroF, aroG, tyrA and aromatic amino acid transport
1762603_s_at	1853.3	P	0.000244	4347.2	P	0.000244	3434.6	P	0.000244	2475.4	P	0.000244	3006.7	P	0.000244	3299.7	P	0.000244	MG1655_tpx_b1324 DB_XREF=PID:g1787584 SEG=NC_000913:-1386329,1386835 LEN=506 DEF=thiol peroxidase
1760533_s_at	331.5	P	0.000244	103.5	P	0.000732	119.6	P	0.000244	277.3	P	0.000244	208.7	P	0.000244	206.4	P	0.000244	EDL933_ycjG_Z2450 DB_XREF=GI:12515438 SEG=NC_002655:-2189458,2190423 LEN=965 DEF=putative muconate cycloisomerase I (EC 5.5.-.-)
1764935_s_at	440.7	P	0.000244	129.5	P	0.000244	220	P	0.000244	530.4	P	0.000244	331.2	P	0.000244	308.6	P	0.000244	MG1655_ycjI_b1326 DB_XREF=PID:g1787586 SEG=NC_000913:-1387894,1388682 LEN=788 DEF=putative carboxypeptidase
1768874_s_at	30.7	P	0.000244	46.4	P	0.00293	50.4	P	0.001953	80.4	P	0.001221	42.7	P	0.00415	36.2	P	0.023926	MG1655_b1327 DB_XREF=PID:g1787587 SEG=NC_000913:-1388957,1389889 LEN=932 DEF=orf, hypothetical protein
1759295_s_at	203.7	P	0.010742	147	A	0.080566	230.3	P	0.01416	198.8	P	0.01416	173.2	P	0.030273	173	P	0.037598	MG1655_ycjZ_b1328 DB_XREF=PID:g1787589 SEG=NC_000913:+1390015,1390914 LEN=899 DEF=putative transcriptional regulator LYSR-type
1760362_s_at	223.7	P	0.001953	120.8	P	0.001953	181.5	P	0.001221	382.8	P	0.008057	179.2	A	0.080566	166.4	A	0.095215	MG1655_b1329 DB_XREF=PID:g1787590 SEG=NC_000913:+1391230,1392864 LEN=1634 DEF=putative transport periplasmic protein
1759981_s_at	76.4	P	0.023926	91.1	A	0.080566	102.6	A	0.111572	100.5	P	0.018555	82.9	A	0.111572	79.3	A	0.171387	MG1655_b1330 DB_XREF=PID:g1787591 SEG=NC_000913:-1392915,1393946 LEN=1031 DEF=orf, hypothetical protein
1765327_s_at	1568.7	P	0.000244	2690.2	P	0.000244	2787	P	0.000244	3585.2	P	0.000244	2830.8	P	0.000244	3633.7	P	0.000244	MG1655_ynaJ_b1332 DB_XREF=PID:g1787593 SEG=NC_000913:+1395389,1395646 LEN=257 DEF=orf, hypothetical protein
1762683_s_at	788.4	P	0.000244	584.6	P	0.000244	754.6	P	0.000244	1192.9	P	0.000244	1320.6	P	0.000244	1203.3	P	0.000244	MG1655_ydaA_b1333 DB_XREF=PID:g1787594 SEG=NC_000913:-1395696,1396646 LEN=950 DEF=orf, hypothetical protein
1764202_s_at	3688	P	0.000244	2482.2	P	0.000244	3014.7	P	0.000244	3933.1	P	0.000244	3420.7	P	0.000244	4063.9	P	0.000244	MG1655_fnr_b1334 DB_XREF=PID:g1787595 SEG=NC_000913:-1396798,1397550 LEN=752 DEF=transcriptional regulation of aerobic, anaerobic respiration, osmotic balance
1767197_s_at	593.4	P	0.000244	419.1	P	0.000244	325.7	P	0.000244	412.5	P	0.000244	368.7	P	0.000244	391.2	P	0.000244	MG1655_ogt_b1335 DB_XREF=PID:g1787596 SEG=NC_000913:-1397745,1398260 LEN=515 DEF=O-6-alkylguanine-DNAcysteine-protein methyltransferase
1761510_s_at	47.2	P	0.000732	63.6	P	0.005859	74.7	P	0.005859	94.9	P	0.000244	61.9	P	0.010742	71.5	P	0.018555	MG1655_b1336 DB_XREF=PID:g1787597 SEG=NC_000913:-1398271,1399803 LEN=1532 DEF=putative pump protein
1762116_s_at	53.8	P	0.001953	70.6	P	0.00415	75.3	P	0.008057	110.1	P	0.000732	91.6	P	0.008057	92.1	P	0.010742	MG1655_b1337 DB_XREF=PID:g1787598 SEG=NC_000913:-1399834,1401279 LEN=1445 DEF=hypothetical protein
1761838_s_at	50.2	P	0.00415	67.6	P	0.010742	94.6	P	0.018555	141.8	P	0.000244	119.3	P	0.001221	74.7	P	0.00415	MG1655_b1338 DB_XREF=PID:g1787599 SEG=NC_000913:-1401279,1402604 LEN=1325 DEF=putative aminohydrolase
1763699_s_at	51.3	P	0.030273	65.6	P	0.001221	105.8	P	0.001953	372.8	P	0.000244	253.3	P	0.000244	260.7	P	0.000244	MG1655_b1339 DB_XREF=PID:g1787601 SEG=NC_000913:+1402765,1403673 LEN=908 DEF=putative transcriptional regulator LYSR-type
1766966_s_at	308.9	P	0.000244	228.6	P	0.000244	318.8	P	0.000244	282.3	P	0.000244	246.4	P	0.000732	241.6	P	0.000244	MG1655_ydaL_b1340 DB_XREF=PID:g1787602 SEG=NC_000913:+1404003,1404566 LEN=563 DEF=orf, hypothetical protein
1767948_s_at	101.3	P	0.001221	53.8	P	0.001221	113.3	P	0.001953	152.5	P	0.001221	126.6	P	0.000732	76.6	P	0.008057	MG1655_b1341 DB_XREF=PID:g1787603 SEG=NC_000913:-1404587,1405879 LEN=1292 DEF=orf, hypothetical protein
1768158_s_at	204	P	0.001221	97.7	P	0.018555	159.4	P	0.010742	179.5	P	0.001221	112.3	P	0.018555	97.2	P	0.01416	MG1655_b1342 DB_XREF=PID:g1787604 SEG=NC_000913:+1406074,1407057 LEN=983 DEF=orf, hypothetical protein
1767218_s_at	379.7	P	0.000244	151.6	P	0.000732	181.6	P	0.001953	200.1	P	0.001221	93.5	P	0.008057	109.2	P	0.010742	MG1655_dbpA_b1343 DB_XREF=PID:g1787605 SEG=NC_000913:+1407535,1408908 LEN=1373 DEF=ATP-dependent RNA helicase
1764766_s_at	650.5	P	0.000732	828.9	P	0.000732	942.8	P	0.000732	484.9	P	0.000244	392.3	P	0.000732	323.8	P	0.000732	MG1655_ydaO_b1344 DB_XREF=PID:g1787606 SEG=NC_000913:-1409037,1409972 LEN=935 DEF=orf, hypothetical protein
1766451_at	35.2	P	0.000244	27	P	0.018555	64.5	P	0.00293	112	P	0.000244	91.9	P	0.000244	80.1	P	0.000244	MG1655_b1345 DB_XREF=PID:g1787607 SEG=NC_000913:-1410024,1411259 LEN=1235 DEF=putative transposase
1760169_s_at	17.1	P	0.000244	19.3	P	0.000732	58.8	P	0.000244	123.2	P	0.000244	53.8	P	0.000244	50.7	P	0.000244	MG1655_b1346 DB_XREF=PID:g1787608 SEG=NC_000913:-1411261,1411500 LEN=239 DEF=putative lambdoid prophage Rac excisionase
1763654_s_at	63.3	P	0.000244	53.1	P	0.000244	74	P	0.000244	123.4	P	0.000244	97.2	P	0.000244	79.6	P	0.000732	MG1655_ydaC_b1347 DB_XREF=PID:g1787609 SEG=NC_000913:-1411555,1411764 LEN=209 DEF=orf, hypothetical protein
1763692_s_at	65.6	P	0.005859	64.8	P	0.037598	69.6	P	0.037598	120.9	P	0.001221	78.1	P	0.00415	77	P	0.01416	MG1655_lar_b1348 DB_XREF=PID:g1787610 SEG=NC_000913:-1411757,1411951 LEN=194 DEF=restriction alleviation and modification enhancement
1769087_s_at	137.3	P	0.000732	64.1	P	0.005859	109.7	P	0.001953	157.1	P	0.000244	159.4	P	0.000244	146	P	0.001953	MG1655_recT_b1349 DB_XREF=PID:g1787611 SEG=NC_000913:-1412008,1412817 LEN=809 DEF=recombinase, DNA renaturation
1767378_s_at	39.4	P	0.000732	31.4	P	0.000732	63.2	P	0.001953	73.2	P	0.000244	72.3	P	0.00415	32.7	P	0.00293	MG1655_recE_b1350 DB_XREF=PID:g1787612 SEG=NC_000913:-1412810,1415410 LEN=2600 DEF=exonuclease VIII, ds DNA exonuclease, 5 --> 3 specific
1760806_s_at	68.5	P	0.000244	42.1	P	0.001953	52.4	P	0.000244	117.9	P	0.001221	61.8	P	0.000732	46.9	P	0.000732	MG1655_racC_b1351 DB_XREF=PID:g1787614 SEG=NC_000913:-1415512,1415787 LEN=275 DEF=RacC protein
1766771_s_at	34.1	P	0.001953	34	P	0.001953	65.2	P	0.010742	68.9	P	0.00415	38.1	P	0.01416	32.4	P	0.001953	MG1655_b1352 DB_XREF=PID:g1787615 SEG=NC_000913:-1416032,1416265 LEN=233 DEF=hypothetical protein
1759979_s_at	26.2	P	0.000732	18.5	P	0.005859	44.9	P	0.000732	68.1	P	0.000244	39.7	P	0.000732	21.5	P	0.000732	SAKAI_ECs1937 DB_XREF=38703968 SEG=NC_002695:+1928142,1928630 LEN=488 DEF=phage superinfection exclusion protein
1760598_s_at	39	A	0.149658	54.3	P	0.046143	79.6	P	0.046143	122.8	P	0.023926	68.6	P	0.030273	60.1	A	0.067627	MG1655_b1354 DB_XREF=PID:g1787617 SEG=NC_000913:+1417192,1417368 LEN=176 DEF=orf, hypothetical protein
1765412_s_at	148.6	P	0.01416	143.1	P	0.030273	148.2	P	0.018555	135.3	P	0.010742	145.2	P	0.01416	142.5	P	0.030273	MG1655_b1355 DB_XREF=PID:g1787618 SEG=NC_000913:-1417346,1417525 LEN=179 DEF=orf, hypothetical protein
1763186_at	1529.3	P	0.000244	1470.4	P	0.000244	1487.1	P	0.000244	1104.5	P	0.000244	1167.2	P	0.000244	856	P	0.000244	MG1655_b1356 DB_XREF=PID:g1787619 SEG=NC_000913:-1417789,1418265 LEN=476 DEF=hypothetical protein
1759418_at	40.4	P	0.001953	26.1	P	0.005859	58.4	P	0.00415	87.1	P	0.000732	65	P	0.001953	49.3	P	0.001221	MG1655_ydaS_b1357 DB_XREF=PID:g1787620 SEG=NC_000913:+1418389,1418685 LEN=296 DEF=orf, hypothetical protein
1759468_at	21.3	P	0.001221	28.1	P	0.001953	29.2	P	0.001221	34.7	P	0.000244	24.6	P	0.000244	19.6	P	0.00293	MG1655_ydaT_b1358 DB_XREF=PID:g1787621 SEG=NC_000913:+1418708,1419130 LEN=422 DEF=orf, hypothetical protein
1763262_at	35.9	P	0.000244	33.7	P	0.00293	40.3	P	0.00293	52.7	P	0.000244	44	P	0.001953	47.5	P	0.001953	MG1655_ydaU_b1359 DB_XREF=PID:g1787622 SEG=NC_000913:+1419143,1420000 LEN=857 DEF=orf, hypothetical protein
1766752_at	47.4	P	0.001953	44.3	P	0.00415	50.7	P	0.000732	74.3	P	0.000732	60.6	P	0.008057	70.7	P	0.010742	MG1655_b1360 DB_XREF=PID:g1787623 SEG=NC_000913:+1420007,1420753 LEN=746 DEF=putative DNA replication factor
1766957_at	75.2	P	0.001221	53.4	A	0.111572	69	P	0.010742	130	P	0.001221	100.4	P	0.00415	69.2	A	0.080566	MG1655_ydaW_b1361 DB_XREF=PID:g1787624 SEG=NC_000913:+1420725,1421336 LEN=611 DEF=orf, hypothetical protein
1763439_at	57.5	P	0.000244	48.6	P	0.001953	59	P	0.000732	62.5	P	0.000244	59.8	P	0.000244	36	P	0.00293	MG1655_b1362 DB_XREF=PID:g1787625 SEG=NC_000913:+1421363,1421668 LEN=305 DEF=putative Rac prophage endopeptidase
1767037_at	330.9	P	0.000244	182	P	0.000244	175.6	P	0.000244	201.9	P	0.000244	97	P	0.000244	96.8	P	0.000244	MG1655_trkG_b1363 DB_XREF=PID:g1787626 SEG=NC_000913:+1421806,1423263 LEN=1457 DEF=trk system potassium uptake
1759207_at	266.9	P	0.000732	145.7	P	0.000732	240.5	P	0.000244	208	P	0.000244	172	P	0.000244	118.6	P	0.000732	MG1655_b1364 DB_XREF=PID:g1787627 SEG=NC_000913:+1423202,1423483 LEN=281 DEF=orf, hypothetical protein
1762172_at	178.7	P	0.001221	98.1	P	0.005859	179.9	P	0.00293	170.8	P	0.001221	74.6	P	0.005859	96.9	P	0.005859	MG1655_b1365 DB_XREF=PID:g1787628 SEG=NC_000913:+1423401,1423664 LEN=263 DEF=orf, hypothetical protein
1762063_at	108.4	P	0.000244	38.3	P	0.000244	55.4	P	0.001953	94.2	P	0.000244	60	P	0.00293	48.8	P	0.005859	MG1655_ydaY_b1366 DB_XREF=PID:g1787629 SEG=NC_000913:+1423645,1424004 LEN=359 DEF=orf, hypothetical protein
1765212_at	98.2	P	0.001221	67.8	P	0.001221	124.6	P	0.001221	166.1	P	0.001953	101.7	P	0.00415	54.7	P	0.008057	MG1655_b1367 DB_XREF=PID:g1787630 SEG=NC_000913:+1424079,1424312 LEN=233 DEF=orf, hypothetical protein
1763205_at	74.3	P	0.000244	44.3	P	0.00293	84.6	P	0.000732	164.5	P	0.000244	66.7	P	0.000244	63.5	P	0.001953	MG1655_b1368 DB_XREF=PID:g1787631 SEG=NC_000913:+1424478,1425506 LEN=1028 DEF=putative alpha helix protein
1765146_x_at	104.5	A	0.129639	34.5	A	0.398926	93.9	A	0.19458	127.3	P	0.023926	69.3	A	0.246094	48.2	A	0.366211	MG1655_b1369 DB_XREF=PID:g1787632 SEG=NC_000913:+1425482,1425637 LEN=155 DEF=orf, hypothetical protein
1761876_at	191.4	P	0.000244	230.7	P	0.000732	224.4	P	0.001953	236.9	P	0.000244	301.7	P	0.000244	285.9	P	0.000732	MG1655_trs5_5_b1370 DB_XREF=PID:g1787634 SEG=NC_000913:-1425770,1426750 LEN=980 DEF=IS5 transposase
1762717_s_at	33.1	P	0.018555	29.8	A	0.080566	25.2	P	0.023926	62.4	P	0.005859	34.5	P	0.030273	46.5	P	0.046143	MG1655_b1371 DB_XREF=PID:g1787635 SEG=NC_000913:+1426547,1427008 LEN=461 DEF=orf, hypothetical protein
1761967_at	21.4	P	0.010742	40.2	P	0.010742	51.9	P	0.001953	61.3	P	0.005859	41.9	P	0.018555	32.4	P	0.000732	MG1655_b1372 DB_XREF=PID:g1787636 SEG=NC_000913:+1427067,1430435 LEN=3368 DEF=putative membrane protein
1762958_s_at	104.5	P	0.000732	61	P	0.000244	123.6	P	0.000244	192.2	P	0.000244	79.3	P	0.000244	68.2	P	0.000732	MG1655_b1373 DB_XREF=PID:g1787637 SEG=NC_000913:+1430435,1431010 LEN=575 DEF=tail fiber assembly protein homolog from lambdoid prophage Rac
1762847_s_at	1034.8	P	0.000244	556.7	P	0.000244	729.2	P	0.000244	616.9	P	0.000244	346.2	P	0.000244	214.5	P	0.000244	MG1655_b1374 DB_XREF=PID:g1787638 SEG=NC_000913:-1431108,1431698 LEN=590 DEF=putative transposon resolvase
1762056_s_at	2292.8	P	0.000244	2407.4	P	0.000732	3251.2	P	0.000732	1790.6	P	0.000244	1346.6	P	0.000732	814.7	P	0.000732	MG1655_ynaE_b1375 DB_XREF=PID:g1787639 SEG=NC_000913:-1432015,1432281 LEN=266 DEF=orf, hypothetical protein
1760228_s_at	243.5	P	0.000244	679.3	P	0.000244	835.4	P	0.000244	1667.3	P	0.000244	1802.7	P	0.000244	2248.7	P	0.000244	SAKAI_ECs1997 DB_XREF=38703971 SEG=NC_002695:-1972708,1973142 LEN=434 DEF=putative filament protein
1761418_s_at	49.8	P	0.000244	44	P	0.000244	33.1	P	0.000244	114.7	P	0.000732	57.3	P	0.001221	50.6	P	0.00415	MG1655_b1377 DB_XREF=PID:g1787641 SEG=NC_000913:-1433784,1434917 LEN=1133 DEF=putative outer membrane protein
1767199_at	47.6	P	0.005859	45.3	P	0.018555	68.2	P	0.00415	133.3	P	0.000732	146.7	P	0.005859	124.8	P	0.023926	MG1655_tke8_b4427 SEG=NC_000913:+1435145,1435252 LEN=107
1768851_s_at	680.9	P	0.000244	428.1	P	0.001221	288.8	P	0.001953	428.7	P	0.000244	342.9	P	0.018555	370.4	P	0.01416	MG1655_ydbK_b1378 DB_XREF=PID:g1787642 SEG=NC_000913:-1435284,1438808 LEN=3524 DEF=putative oxidoreductase, Fe-S subunit
1764062_s_at	1180.2	P	0.000244	1374.5	P	0.000244	1223.8	P	0.000244	366.7	P	0.000732	288.2	P	0.000732	326.5	P	0.000732	MG1655_hslJ_b1379 DB_XREF=PID:g1787644 SEG=NC_000913:-1439345,1439767 LEN=422 DEF=heat shock protein hslJ
1765416_s_at	1068.2	P	0.000244	926.6	P	0.000244	852.9	P	0.000244	374.4	P	0.000244	601.1	P	0.000244	450.9	P	0.000244	MG1655_ldhA_b1380 DB_XREF=PID:g1787645 SEG=NC_000913:-1439878,1440867 LEN=989 DEF=fermentative D-lactate dehydrogenase, NAD-dependent
1763840_at	180.5	P	0.000732	180	P	0.000732	199.8	P	0.000244	174.2	P	0.000732	184	P	0.000732	203.1	P	0.000732	MG1655_ydbH_b1381 DB_XREF=PID:g1787646 SEG=NC_000913:+1441075,1443714 LEN=2639 DEF=orf, hypothetical protein
1764475_s_at	138	P	0.000244	204.4	P	0.000244	322	P	0.000244	234.5	P	0.000244	209.5	P	0.000732	226.6	P	0.000732	MG1655_ynbE_b1382 DB_XREF=PID:g1787647 SEG=NC_000913:+1443711,1443896 LEN=185 DEF=orf, hypothetical protein
1766171_s_at	141.5	P	0.000244	200.9	P	0.000732	260.1	P	0.000244	227.2	P	0.000244	172.9	P	0.000244	161.2	P	0.000244	MG1655_ydbL_b1383 DB_XREF=PID:g1787648 SEG=NC_000913:+1443898,1444230 LEN=332 DEF=orf, hypothetical protein
1768900_at	43.9	P	0.01416	86.8	P	0.000732	92.7	P	0.000244	348.9	P	0.000244	196.7	P	0.000244	186.8	P	0.000244	MG1655_feaR_b1384 DB_XREF=PID:g1787649 SEG=NC_000913:-1444402,1445307 LEN=905 DEF=regulatory protein for 2-phenylethylamine catabolism
1769185_at	64.2	P	0.000244	54.3	P	0.000244	96.4	P	0.000244	153.3	P	0.000732	121.2	P	0.001221	106	P	0.001953	MG1655_feaB_b1385 DB_XREF=PID:g1787650 SEG=NC_000913:+1445540,1447042 LEN=1502 DEF=phenylacetaldehyde dehydrogenase
1767721_at	59.8	P	0.005859	48.9	P	0.023926	89.9	P	0.005859	134.9	P	0.001953	97.6	P	0.008057	91.5	P	0.008057	MG1655_tynA_b1386 DB_XREF=PID:g1787651 SEG=NC_000913:-1447100,1449373 LEN=2273 DEF=copper amine oxidase (tyramine oxidase)
1763923_at	30	P	0.008057	42.4	P	0.01416	67	P	0.008057	115.6	P	0.001221	70.7	P	0.010742	50.8	P	0.037598	MG1655_b1387 DB_XREF=PID:g1787653 SEG=NC_000913:-1449621,1451666 LEN=2045 DEF=putative aldehyde dehydrogenase
1767860_at	20.6	P	0.000732	30	P	0.000732	58.9	P	0.005859	94.7	P	0.000244	72.1	P	0.001221	49.1	P	0.00415	MG1655_b1388 DB_XREF=PID:g1787654 SEG=NC_000913:+1451951,1452880 LEN=929 DEF=hypothetical protein
1763974_at	17.6	A	0.219482	28.2	A	0.111572	38	A	0.095215	52.1	P	0.005859	40.6	P	0.00415	37.8	P	0.00293	MG1655_b1389 DB_XREF=PID:g1787655 SEG=NC_000913:+1452892,1453179 LEN=287 DEF=hypothetical protein
1767789_at	19.8	A	0.111572	41.9	A	0.095215	52.5	P	0.023926	97.1	P	0.005859	52	P	0.018555	51.4	A	0.080566	MG1655_b1390 DB_XREF=PID:g1787656 SEG=NC_000913:+1453188,1453934 LEN=746 DEF=hypothetical protein
1766536_at	58.9	P	0.046143	41	P	0.030273	88.9	P	0.005859	113.7	P	0.000732	85.6	P	0.010742	59.5	P	0.023926	MG1655_b1391 DB_XREF=PID:g1787657 SEG=NC_000913:+1453943,1454446 LEN=503 DEF=hypothetical protein
1764442_at	29	A	0.067627	47.2	P	0.030273	86.6	P	0.018555	129.1	P	0.00293	77.8	P	0.023926	70.2	P	0.018555	MG1655_b1392 DB_XREF=PID:g1787658 SEG=NC_000913:+1454454,1455524 LEN=1070 DEF=putative oxidoreductase
1761348_at	27.7	A	0.067627	38.5	A	0.129639	48.6	A	0.111572	75.2	P	0.010742	49.9	A	0.095215	49.6	A	0.111572	MG1655_b1393 DB_XREF=PID:g1787659 SEG=NC_000913:+1455521,1456288 LEN=767 DEF=hypothetical protein
1759741_at	32.7	P	0.00293	51.8	P	0.000732	54.4	P	0.000244	121.7	P	0.000244	82.5	P	0.000244	61	P	0.000244	MG1655_b1394 DB_XREF=PID:g1787660 SEG=NC_000913:+1456288,1457076 LEN=788 DEF=hypothetical protein
1765137_at	37.9	P	0.000732	37.9	P	0.001221	52.3	P	0.001221	94.7	P	0.000244	65.9	P	0.000732	51.7	P	0.00293	MG1655_b1395 DB_XREF=PID:g1787661 SEG=NC_000913:+1457078,1458505 LEN=1427 DEF=hypothetical protein
1765606_at	49.3	P	0.023926	48.6	P	0.037598	73.9	M	0.056152	134.8	P	0.018555	82.3	P	0.023926	76.3	P	0.030273	MG1655_b1396 DB_XREF=PID:g1787662 SEG=NC_000913:+1458495,1458917 LEN=422 DEF=hypothetical protein
1768616_at	81.4	P	0.000244	93.8	P	0.001953	105.1	P	0.000244	221.7	P	0.000244	162.7	P	0.000244	162.9	P	0.000244	MG1655_b1397 DB_XREF=PID:g1787663 SEG=NC_000913:+1458917,1460122 LEN=1205 DEF=putative acyltransferase
1763270_at	125.9	P	0.00415	93.2	P	0.01416	88.8	P	0.010742	268.9	P	0.000244	168.2	P	0.000244	184.6	P	0.001953	MG1655_b1398 DB_XREF=PID:g1787664 SEG=NC_000913:+1460149,1461462 LEN=1313 DEF=hypothetical protein
1767036_at	190.6	P	0.001953	173.7	P	0.023926	291.1	P	0.005859	309	P	0.008057	266	P	0.005859	274.5	P	0.008057	MG1655_b1399 DB_XREF=PID:g1787666 SEG=NC_000913:+1461563,1462513 LEN=950 DEF=hypothetical protein
1764657_at	230.7	P	0.000244	198.2	P	0.000244	289	P	0.000244	416.2	P	0.000244	509.8	P	0.000244	379.1	P	0.000244	MG1655_b1400 DB_XREF=PID:g1787667 SEG=NC_000913:+1462495,1463085 LEN=590 DEF=putative transferase
1762340_at	102.5	P	0.010742	75	P	0.008057	90.7	P	0.030273	140.5	P	0.008057	92.7	P	0.030273	76.1	P	0.037598	MG1655_ydbA_1_b1401 DB_XREF=PID:g1787668 SEG=NC_000913:+1463416,1465974 LEN=2558 DEF=orf, hypothetical protein
1767270_at	436.1	P	0.000244	101.9	P	0.000244	146.5	P	0.000244	253	P	0.000244	92	P	0.000244	98.2	P	0.000244	MG1655_ydbA_2_b1405 DB_XREF=PID:g1787672 SEG=NC_000913:+1468714,1472037 LEN=3323 DEF=orf, hypothetical protein
1763287_s_at	53.2	A	0.129639	56.7	A	0.303711	70.9	A	0.171387	283.3	P	0.000732	191.5	P	0.010742	130.5	P	0.008057	MG1655_ydbC_b1406 DB_XREF=PID:g1787674 SEG=NC_000913:+1472245,1473105 LEN=860 DEF=putative dehydrogenase
1763358_at	49.9	P	0.001953	48.3	P	0.008057	91.3	P	0.018555	210.3	P	0.000732	100.6	P	0.008057	70.6	P	0.010742	MG1655_ydbD_b1407 DB_XREF=PID:g1787675 SEG=NC_000913:+1473162,1475474 LEN=2312 DEF=orf, hypothetical protein
1760718_s_at	18.4	P	0.008057	33.6	P	0.00415	37.3	P	0.00293	68.8	P	0.000244	40.1	P	0.000244	34.2	P	0.00415	MG1655_b1408 DB_XREF=PID:g1787676 SEG=NC_000913:+1475639,1476250 LEN=611 DEF=hypothetical protein
1762511_s_at	22	P	0.000244	20.9	P	0.000244	108.2	P	0.001221	164.2	P	0.000244	92.8	P	0.000732	34.2	P	0.001221	MG1655_b1409 DB_XREF=PID:g1787677 SEG=NC_000913:+1476250,1477146 LEN=896 DEF=putative phosphatidate cytidiltransferase
1765536_s_at	182.9	P	0.000244	68.1	P	0.005859	156.7	P	0.005859	215.9	P	0.000244	194.3	P	0.00293	146.3	P	0.00415	MG1655_b1410 DB_XREF=PID:g1787678 SEG=NC_000913:+1477162,1478919 LEN=1757 DEF=orf, hypothetical protein
1767994_s_at	112.5	P	0.01416	44.1	A	0.111572	144.1	P	0.018555	215.7	P	0.005859	108.3	P	0.023926	63.8	A	0.067627	MG1655_ynbD_b1411 DB_XREF=PID:g1787679 SEG=NC_000913:+1478933,1480225 LEN=1292 DEF=putative enzymes
1766518_s_at	172.4	P	0.023926	158.1	A	0.067627	159.6	P	0.037598	390.5	P	0.001953	224.2	M	0.056152	261.7	P	0.023926	MG1655_acpD_b1412 DB_XREF=PID:g1787680 SEG=NC_000913:-1480279,1480884 LEN=605 DEF=acyl carrier protein phosphodiesterase
1763841_at	650.2	P	0.000244	275.6	P	0.000244	319.8	P	0.000244	356.7	P	0.000244	286	P	0.000244	288.4	P	0.000244	MG1655_hrpA_b1413 DB_XREF=PID:g1787681 SEG=NC_000913:+1481142,1484987 LEN=3845 DEF=helicase, ATP-dependent
1762014_s_at	464.7	P	0.001953	427.9	P	0.001953	426.7	P	0.00415	645.7	P	0.000244	615.3	P	0.000732	626.2	P	0.000244	MG1655_ydcF_b1414 DB_XREF=PID:g1787683 SEG=NC_000913:+1485259,1486059 LEN=800 DEF=orf, hypothetical protein
1764023_s_at	52.9	P	0.010742	84	P	0.00293	151.7	P	0.001221	1410.7	P	0.000244	1283.9	P	0.000244	1558.8	P	0.000244	MG1655_aldA_b1415 DB_XREF=PID:g1787684 SEG=NC_000913:+1486256,1487695 LEN=1439 DEF=aldehyde dehydrogenase, NAD-linked
1766172_s_at	1439.1	P	0.000244	914.5	P	0.000244	1224.1	P	0.000244	1711.6	P	0.000244	1221.7	P	0.000244	852.2	P	0.000244	MG1655_gapC_2_b1416 DB_XREF=PID:g1787685 SEG=NC_000913:-1487737,1487988 LEN=251 DEF=glyceraldehyde-3-phosphate dehydrogenase (second fragment)
1762113_s_at	1591.7	P	0.000244	1306.4	P	0.000244	1504.9	P	0.000244	1846.8	P	0.000244	1286.6	P	0.000244	1168.7	P	0.000244	MG1655_gapC_1_b1417 DB_XREF=PID:g1787686 SEG=NC_000913:-1487985,1488389 LEN=404 DEF=glyceraldehyde 3-phosphate dehydrogenase C, interrupted
1761088_s_at	814.9	P	0.000244	977.3	P	0.000244	1389	P	0.000244	1349	P	0.000244	933.2	P	0.000244	1008	P	0.000244	MG1655_cybB_b1418 DB_XREF=PID:g1787687 SEG=NC_000913:+1488890,1489456 LEN=566 DEF=cytochrome b(561)
1767081_s_at	238	P	0.000732	128.9	P	0.001953	260.5	P	0.000244	434.2	P	0.000244	296.5	P	0.000244	273.8	P	0.000732	MG1655_ydcA_b1419 DB_XREF=PID:g1787688 SEG=NC_000913:+1489701,1489874 LEN=173 DEF=orf, hypothetical protein
1763295_s_at	403.7	P	0.001953	213.9	P	0.005859	254.8	P	0.00415	2372.5	P	0.000244	1728	P	0.000244	1606.2	P	0.000244	MG1655_hokB_b4428 SEG=NC_000913:-1489946,1490095 LEN=149 DEF=small toxic membrane polypeptide
1762609_s_at	211.2	P	0.001221	108.5	P	0.018555	189.3	P	0.00293	1469.3	P	0.000244	1085.7	P	0.000244	865.5	P	0.000244	MG1655_mokB_b1420 DB_XREF=PID:g1787689 SEG=NC_000913:-1489986,1490153 LEN=167 DEF=regulatory peptide whose translation enables hokB expression
1759132_at	431.5	P	0.000244	231.3	P	0.000732	735	P	0.000244	1102.5	P	0.000244	507.8	P	0.000244	433.5	P	0.000244	MG1655_sokB_b4429 SEG=NC_000913:+1490143,1490195 LEN=52 DEF=antisense RNA blocking mokB and hokB translation
1767439_s_at	112.4	P	0.001221	73.4	P	0.001221	118.8	P	0.001221	190.4	P	0.000244	1171.8	P	0.000244	1407.8	P	0.000244	CFT073_c1846 DB_XREF=26247707 SEG=NC_004431:+1686126,1686596 LEN=470 DEF=Putative conserved protein
1762017_s_at	188.7	P	0.000732	586.6	P	0.000244	718.3	P	0.000244	827	P	0.000244	863.9	P	0.000244	920	P	0.000244	SAKAI_ECs2027 DB_XREF=38703975 SEG=NC_002695:-2011657,2012580 LEN=923 DEF=putative transcriptional regulator LYSR-type
1759558_s_at	93.2	P	0.00415	95.5	P	0.00415	129.2	P	0.001953	226.8	P	0.001953	157	P	0.001953	145.7	P	0.00293	EDL933_Z2297 DB_XREF=GI:12515283 SEG=NC_002655:-2074877,2075515 LEN=638 DEF=orf; Unknown function
1759835_s_at	425.5	P	0.000244	141.2	P	0.001953	188.9	P	0.000244	222.8	P	0.000244	164.5	P	0.000244	206.1	P	0.001221	MG1655_ydcG_b1424 DB_XREF=PID:g1787693 SEG=NC_000913:+1494880,1496535 LEN=1655 DEF=putative glycoprotein
1762519_s_at	59	P	0.000244	33.6	P	0.00415	47.1	P	0.000244	68.3	P	0.000244	52.5	P	0.00415	24.2	P	0.008057	MG1655_b1425 DB_XREF=PID:g1787694 SEG=NC_000913:-1496456,1496659 LEN=203 DEF=orf, hypothetical protein
1765279_s_at	157.8	P	0.000732	125.4	P	0.000732	139.4	P	0.000244	2091.9	P	0.000244	368.6	P	0.000244	432.6	P	0.000244	MG1655_ydcH_b1426 DB_XREF=PID:g1787696 SEG=NC_000913:+1496732,1496899 LEN=167 DEF=orf, hypothetical protein
1767516_s_at	312.4	P	0.000244	239.2	P	0.000244	246.4	P	0.000244	516.1	P	0.000244	219.1	P	0.023926	179.9	P	0.023926	MG1655_rimL_b1427 DB_XREF=PID:g1787697 SEG=NC_000913:+1496962,1497501 LEN=539 DEF=ribosomal-protein-serine acetyltransferase
1760250_s_at	110.8	P	0.018555	61.1	P	0.023926	88.2	P	0.01416	147.7	P	0.000732	71	P	0.00293	66.9	P	0.001221	MG1655_b1428 DB_XREF=PID:g1787698 SEG=NC_000913:-1497493,1498473 LEN=980 DEF=orf, hypothetical protein
1760390_s_at	555	P	0.000244	177.6	P	0.001221	256.7	P	0.000732	345.2	P	0.000732	201.3	P	0.001221	174.2	P	0.000732	MG1655_tehA_b1429 DB_XREF=PID:g1787699 SEG=NC_000913:+1498597,1499589 LEN=992 DEF=TehA
1763096_s_at	607.3	P	0.000244	304	P	0.000244	350.5	P	0.000244	330.2	P	0.000244	258.7	P	0.000244	251.3	P	0.000244	MG1655_tehB_b1430 DB_XREF=PID:g1787700 SEG=NC_000913:+1499586,1500179 LEN=593 DEF=TehB
1761191_s_at	590.1	P	0.000244	153.1	P	0.000244	185.1	P	0.000244	463.1	P	0.000244	336	P	0.000244	354.8	P	0.000244	MG1655_b1431 DB_XREF=PID:g1787701 SEG=NC_000913:+1500481,1501149 LEN=668 DEF=orf, hypothetical protein
1765997_s_at	462.8	P	0.000732	184.2	P	0.000732	265.3	P	0.000244	228.2	P	0.00415	196.4	P	0.001221	174.1	P	0.001221	MG1655_b1432 DB_XREF=PID:g1787702 SEG=NC_000913:+1501681,1502889 LEN=1208 DEF=putative virulence protein
1764410_s_at	36.3	P	0.001221	45.6	P	0.001953	62.4	P	0.00293	90.9	P	0.000732	79.3	P	0.00415	59.5	P	0.00415	EDL933_Z2286 DB_XREF=GI:12515269 SEG=NC_002655:+2066573,2067802 LEN=1229 DEF=putative membrane transport protein
1760261_s_at	130.6	P	0.000732	97.8	P	0.000732	172.7	P	0.00415	176.6	P	0.001953	102.1	P	0.018555	76	P	0.023926	MG1655_ydcN_b1434 DB_XREF=PID:g1787704 SEG=NC_000913:+1504196,1504732 LEN=536 DEF=orf, hypothetical protein
1762566_s_at	375.7	P	0.000244	222.8	P	0.000244	256.5	P	0.000244	282.2	P	0.000244	278.6	P	0.000244	198.1	P	0.000732	MG1655_ydcP_b1435 DB_XREF=PID:g1787705 SEG=NC_000913:+1504763,1506766 LEN=2003 DEF=putative protease
1763859_s_at	644.8	P	0.000244	122.9	P	0.000244	148.2	P	0.000732	905.4	P	0.000244	408.9	P	0.000244	518	P	0.000244	MG1655_b1436 DB_XREF=PID:g1787707 SEG=NC_000913:-1506858,1507088 LEN=230 DEF=orf, hypothetical protein
1767407_s_at	106.7	P	0.00415	64.8	P	0.008057	112.1	P	0.01416	222.5	P	0.001221	115.8	P	0.023926	82.2	P	0.018555	MG1655_b1437 DB_XREF=PID:g1787708 SEG=NC_000913:-1507274,1507471 LEN=197 DEF=orf, hypothetical protein
1764733_s_at	503.2	P	0.000244	237.1	P	0.000244	295.5	P	0.000244	417.5	P	0.000244	226.4	P	0.000244	223.4	P	0.000244	MG1655_b1438 DB_XREF=PID:g1787709 SEG=NC_000913:+1507511,1507948 LEN=437 DEF=orf, hypothetical protein
1764298_s_at	364.5	P	0.001221	149.3	P	0.001221	114.2	P	0.000732	200.4	P	0.000732	147.6	P	0.000244	131.6	P	0.001221	MG1655_b1439 DB_XREF=PID:g1787710 SEG=NC_000913:+1508027,1509433 LEN=1406 DEF=multi modular; putative transcriptional regulator; also putative ATP-binding component of a transport system
1764131_s_at	37.1	P	0.030273	31.4	A	0.095215	48.9	A	0.095215	105.1	P	0.030273	47.1	A	0.149658	41.4	A	0.111572	MG1655_b1440 DB_XREF=PID:g1787711 SEG=NC_000913:+1509678,1510823 LEN=1145 DEF=putative transport protein
1765189_s_at	41.8	P	0.037598	27	A	0.067627	50.9	P	0.023926	109.3	P	0.00293	101.4	P	0.01416	58.6	P	0.030273	MG1655_b1441 DB_XREF=PID:g1787712 SEG=NC_000913:+1510841,1511854 LEN=1013 DEF=putative ATP-binding component of a transport system
1762984_s_at	40.9	P	0.001953	40.5	P	0.010742	58.8	P	0.000244	91.8	P	0.000244	53.2	P	0.00293	38.5	P	0.000244	MG1655_b1442 DB_XREF=PID:g1787713 SEG=NC_000913:+1511855,1512796 LEN=941 DEF=putative transport system permease protein
1761276_s_at	22.1	P	0.00293	46.1	P	0.001953	84.3	P	0.000244	100	P	0.000244	59.2	P	0.000244	33.4	P	0.00293	CFT073_ydcV_c1867 DB_XREF=26247728 SEG=NC_004431:+1705056,1705700 LEN=644 DEF=Hypothetical ABC transporter permease protein ydcV
1766377_s_at	82.7	P	0.000244	63.2	P	0.000244	72.9	P	0.000244	144.2	P	0.000244	117.1	P	0.000244	127.1	P	0.000244	MG1655_b1444 DB_XREF=PID:g1787715 SEG=NC_000913:+1513602,1515026 LEN=1424 DEF=putative aldehyde dehydrogenase
1763457_s_at	583.2	P	0.000244	198.4	P	0.000244	294.8	P	0.000244	203.9	P	0.000244	212.7	P	0.000244	147.1	P	0.000244	MG1655_b1445 DB_XREF=PID:g1787716 SEG=NC_000913:+1515338,1515586 LEN=248 DEF=orf, hypothetical protein
1766725_s_at	920.2	P	0.000244	1065	P	0.000244	1018.9	P	0.001221	889.6	P	0.001953	772.8	P	0.001953	867.8	P	0.001953	MG1655_b1446 DB_XREF=PID:g1787717 SEG=NC_000913:+1515672,1515905 LEN=233 DEF=orf, hypothetical protein
1761776_s_at	319.5	P	0.001953	129.4	P	0.00415	154.9	P	0.00293	274.4	P	0.001953	217	P	0.001221	178.7	P	0.001953	MG1655_b1447 DB_XREF=PID:g1787718 SEG=NC_000913:-1515906,1516355 LEN=449 DEF=orf, hypothetical protein
1762534_s_at	962.6	P	0.000244	415.7	P	0.000244	429.7	P	0.000244	1097.1	P	0.000244	889.4	P	0.000244	1042	P	0.000244	MG1655_b1448 DB_XREF=PID:g1787719 SEG=NC_000913:-1516352,1516870 LEN=518 DEF=putative resistance protein
1768211_s_at	49.7	P	0.000244	38	P	0.000244	66.4	P	0.000244	206.8	P	0.000244	142.7	P	0.000244	145.5	P	0.000244	MG1655_yncB_b1449 DB_XREF=PID:g1787721 SEG=NC_000913:+1516958,1518088 LEN=1130 DEF=putative oxidoreductase
1764603_s_at	37.3	P	0.018555	40.8	P	0.001953	46.8	P	0.001953	112.9	P	0.001221	61	P	0.001953	50.1	P	0.001221	SAKAI_ECs2054 DB_XREF=38703979 SEG=NC_002695:+2036025,2036690 LEN=665 DEF=hypothetical protein
1759440_at	61.1	P	0.005859	130.2	P	0.000732	165.6	P	0.000732	95	P	0.00293	63.8	M	0.056152	59.6	P	0.018555	MG1655_b1451 DB_XREF=PID:g1787723 SEG=NC_000913:-1518987,1521089 LEN=2102 DEF=putative outer membrane receptor for iron transport
1759697_s_at	535.7	P	0.000244	886.3	P	0.000244	934.7	P	0.000244	177.8	P	0.000244	1343.3	P	0.000244	1389.9	P	0.000244	MG1655_b1452 DB_XREF=PID:g1787724 SEG=NC_000913:+1521331,1522392 LEN=1061 DEF=putative receptor
1764046_s_at	122.1	P	0.001221	74.2	P	0.01416	94.6	P	0.00415	106.4	P	0.000244	76.9	P	0.000244	65.8	P	0.005859	CFT073_ansP_c1878 DB_XREF=26247736 SEG=NC_004431:-1713141,1714691 LEN=1550 DEF=L-asparagine permease
1759491_s_at	33.8	P	0.008057	32.1	P	0.010742	47.1	P	0.023926	74.4	P	0.000732	56.7	P	0.00293	31.6	P	0.010742	MG1655_b1454 DB_XREF=PID:g1787726 SEG=NC_000913:+1524271,1524888 LEN=617 DEF=putative transferase
1760300_s_at	5.9	P	0.00293	9.6	P	0.01416	19.8	P	0.001953	40.1	P	0.000244	16.2	P	0.01416	21.2	P	0.005859	MG1655_b1455 DB_XREF=PID:g1787727 SEG=NC_000913:+1524964,1525176 LEN=212 DEF=orf, hypothetical protein
1765612_s_at	116.1	P	0.000244	92.1	P	0.000244	159.4	P	0.000244	173.4	P	0.000244	80.3	P	0.000244	75.3	P	0.000244	MG1655_rhsE_b1456 DB_XREF=PID:g1787728 SEG=NC_000913:+1525914,1527962 LEN=2048 DEF=RhsE
1763887_s_at	612.6	P	0.000244	642.9	P	0.000244	652	P	0.000244	658.9	P	0.000244	475.7	P	0.000244	551.9	P	0.000244	EDL933_Z0274 DB_XREF=GI:12512985 SEG=NC_002655:+275754,276017 LEN=263 DEF=orf; Unknown function
1759098_s_at	58.9	P	0.000244	59.1	P	0.000244	61.3	P	0.000244	112.2	P	0.000244	74.8	P	0.000244	68	P	0.000244	MG1655_b1458 DB_XREF=PID:g1787731 SEG=NC_000913:+1528610,1529356 LEN=746 DEF=orf, hypothetical protein
1760735_s_at	30.8	P	0.000244	38.7	P	0.000244	48.7	P	0.000244	82	P	0.000244	65.3	P	0.000244	53.5	P	0.000244	MG1655_b1459 DB_XREF=PID:g1787732 SEG=NC_000913:+1529400,1529600 LEN=200 DEF=orf, hypothetical protein
1767610_s_at	115	P	0.000244	170.6	P	0.000244	146.5	P	0.000244	297.8	P	0.000244	202.6	P	0.000244	247.1	P	0.000244	MG1655_ydcE_b1461 DB_XREF=PID:g1787734 SEG=NC_000913:+1531076,1531309 LEN=233 DEF=orf, hypothetical protein
1762507_s_at	31.3	P	0.018555	15.2	A	0.149658	49.8	P	0.001953	72.8	P	0.000244	72.6	P	0.001221	33.2	P	0.00415	EDL933_Z2251 DB_XREF=GI:12515230 SEG=NC_002655:+2035511,2035954 LEN=443 DEF=orf; Unknown function
1768514_s_at	227.6	P	0.000244	122.7	P	0.000244	185.1	P	0.000244	322.2	P	0.000244	234.9	P	0.000732	230.6	P	0.000244	MG1655_b1463 DB_XREF=PID:g1787736 SEG=NC_000913:+1532048,1532893 LEN=845 DEF=putative N-hydroxyarylamine O-acetyltransferase
1762592_s_at	610.2	P	0.000244	470.4	P	0.000732	397.9	P	0.000244	519.6	P	0.000244	381.6	P	0.000244	304.1	P	0.000732	MG1655_yddE_b1464 DB_XREF=PID:g1787737 SEG=NC_000913:-1532989,1533882 LEN=893 DEF=orf, hypothetical protein
1765346_s_at	48.5	P	0.00415	45.9	P	0.030273	83.4	P	0.001953	155.1	P	0.00293	69.8	P	0.005859	68.7	P	0.037598	MG1655_narV_b1465 DB_XREF=PID:g1787738 SEG=NC_000913:-1533961,1534641 LEN=680 DEF=cryptic nitrate reductase 2 gamma subunit
1763996_s_at	82.1	P	0.001953	73.8	P	0.001953	81.8	P	0.001221	152.8	P	0.000244	101.2	P	0.000244	86.4	P	0.001953	MG1655_narW_b1466 DB_XREF=PID:g1787739 SEG=NC_000913:-1534638,1535333 LEN=695 DEF=cryptic nitrate reductase 2 delta subunit
1759976_s_at	24.4	M	0.056152	15.6	A	0.19458	46.9	M	0.056152	86.7	P	0.023926	47.7	A	0.111572	37.7	A	0.129639	MG1655_narY_b1467 DB_XREF=PID:g1787740 SEG=NC_000913:-1535333,1536877 LEN=1544 DEF=cryptic nitrate reductase 2 beta subunit
1761429_at	18.5	P	0.008057	10.5	A	0.366211	23	A	0.149658	65.4	P	0.005859	29	A	0.067627	21.3	A	0.171387	MG1655_narZ_b1468 DB_XREF=PID:g1787741 SEG=NC_000913:-1536874,1540614 LEN=3740 DEF=cryptic nitrate reductase 2 alpha subunit
1762123_s_at	36.7	P	0.010742	41.8	P	0.005859	31.2	P	0.008057	65.3	P	0.000732	43.9	P	0.010742	31.9	P	0.018555	MG1655_narU_b1469 DB_XREF=PID:g1787743 SEG=NC_000913:-1540696,1542084 LEN=1388 DEF=nitrite extrusion protein 2
1764287_s_at	8	P	0.008057	21.5	P	0.001953	40	P	0.000732	95.1	P	0.000732	42.9	P	0.000732	27	P	0.00415	MG1655_b1470 DB_XREF=PID:g1787744 SEG=NC_000913:-1542408,1542743 LEN=335 DEF=orf, hypothetical protein
1764611_at	6.1	P	0.000244	8.3	P	0.010742	12.1	P	0.000732	25.5	P	0.000732	19.8	P	0.000244	19.6	P	0.000732	MG1655_b1471 DB_XREF=PID:g1787745 SEG=NC_000913:-1542782,1543738 LEN=956 DEF=putative glycoportein
1765054_s_at	6.1	A	0.067627	14.1	A	0.095215	27.8	P	0.018555	68.2	P	0.000244	28.9	P	0.018555	29	M	0.056152	MG1655_b1472 DB_XREF=PID:g1787746 SEG=NC_000913:-1543762,1544052 LEN=290 DEF=putative outer membrane porin protein
1762291_s_at	76.5	P	0.01416	81.2	P	0.010742	101	P	0.001953	102.9	P	0.001953	87.3	P	0.008057	73.5	P	0.005859	MG1655_yddG_b1473 DB_XREF=PID:g1787747 SEG=NC_000913:-1544312,1545193 LEN=881 DEF=orf, hypothetical protein
1761354_s_at	121	P	0.000732	142.7	P	0.000244	162.6	P	0.000244	115.5	P	0.000244	67.1	P	0.000244	62.6	P	0.001953	SAKAI_ECs5443 DB_XREF=38703984 SEG=NC_002695:+2068823,2069410 LEN=587 DEF=hypothetical protein
1763995_s_at	120.7	P	0.001221	134	P	0.000732	131.2	P	0.000732	155.6	P	0.000732	129.8	P	0.000732	98.6	P	0.001221	MG1655_fdnH_b1475 DB_XREF=PID:g1787749 SEG=NC_000913:+1548485,1549369 LEN=884 DEF=formate dehydrogenase-N, nitrate-inducible, iron-sulfur beta subunit
1760891_s_at	86.7	P	0.037598	107.4	P	0.046143	167.1	A	0.080566	134.6	A	0.067627	57.3	A	0.19458	67.3	A	0.129639	MG1655_fdnI_b1476 DB_XREF=PID:g1787750 SEG=NC_000913:+1549362,1550015 LEN=653 DEF=formate dehydrogenase-N, nitrate-inducible, cytochrome B556(Fdn) gamma subunit
1767217_s_at	572.9	P	0.000244	236.4	P	0.000244	351.6	P	0.000732	610.4	P	0.000244	592.5	P	0.000244	607.2	P	0.000732	MG1655_yddM_b1477 DB_XREF=PID:g1787751 SEG=NC_000913:-1550422,1550784 LEN=362 DEF=orf, hypothetical protein
1768844_s_at	212.7	P	0.000244	94.7	P	0.000244	112.8	P	0.000732	219.6	P	0.000244	233.9	P	0.000244	249.2	P	0.000244	CFT073_adhP_c1911 DB_XREF=26247768 SEG=NC_004431:-1745792,1746832 LEN=1040 DEF=Alcohol dehydrogenase, propanol-preferring
1764074_s_at	340.1	P	0.000244	298.9	P	0.000732	408.1	P	0.000732	537.2	P	0.000244	590.8	P	0.000244	591.9	P	0.000244	MG1655_sfcA_b1479 DB_XREF=PID:g1787754 SEG=NC_000913:-1551996,1553720 LEN=1724 DEF=NAD-linked malate dehydrogenase (malic enzyme)
1767590_s_at	779.4	P	0.000244	862.2	P	0.000244	1023.6	P	0.000244	1907.8	P	0.000244	1448.8	P	0.000244	1580.2	P	0.000244	MG1655_rpsV_b1480 DB_XREF=PID:g1787755 SEG=NC_000913:-1553850,1553987 LEN=137 DEF=30S ribosomal subunit protein S22; stationary phase-induced ribosome-associated protein
1763445_s_at	29.2	P	0.001953	77.1	P	0.000244	98.2	P	0.000244	50.8	P	0.000244	77	P	0.000732	62.8	P	0.001221	SAKAI_ECs2085 DB_XREF=38703986 SEG=NC_002695:-2077308,2077523 LEN=215 DEF=hypothetical protein
1768689_s_at	184.1	P	0.000244	313.8	P	0.000244	307.9	P	0.000244	365.6	P	0.000244	462.6	P	0.000244	421	P	0.000244	MG1655_osmC_b1482 DB_XREF=PID:g1787757 SEG=NC_000913:+1554649,1555080 LEN=431 DEF=osmotically inducible protein
1762571_at	24.1	P	0.046143	23.3	A	0.219482	42.5	A	0.080566	82.6	P	0.01416	65.9	A	0.067627	29.8	A	0.095215	MG1655_b1483 DB_XREF=PID:g1787758 SEG=NC_000913:-1555136,1556062 LEN=926 DEF=putative ATP-binding component of a transport system
1763848_s_at	65.5	P	0.000244	63.4	P	0.000244	66.1	P	0.000244	107.5	P	0.000244	83.6	P	0.000244	90.4	P	0.000244	MG1655_b1484 DB_XREF=PID:g1787759 SEG=NC_000913:-1556055,1557041 LEN=986 DEF=putative ATP-binding component of a transport system
1767620_s_at	119.1	A	0.111572	59.1	A	0.149658	117.6	A	0.129639	182.6	P	0.030273	127.2	A	0.111572	93	A	0.111572	MG1655_b1485 DB_XREF=PID:g1787760 SEG=NC_000913:-1557038,1557934 LEN=896 DEF=putative transport protein
1763704_s_at	45.1	P	0.000732	38.7	P	0.001221	73.1	P	0.000244	155.5	P	0.000244	77.6	P	0.001221	62.3	P	0.000244	SAKAI_ECs2090 DB_XREF=15831344 SEG=NC_002695:-2081150,2081896 LEN=746 DEF=hypothetical protein
1763056_s_at	51.5	P	0.000244	54.5	P	0.000244	64.2	P	0.00293	110.4	P	0.000732	94.5	P	0.000244	70.3	P	0.000244	MG1655_b1487 DB_XREF=PID:g1787762 SEG=NC_000913:-1558955,1560505 LEN=1550 DEF=putative hemin-binding lipoprotein
1764014_s_at	32.1	P	0.023926	41	P	0.01416	36.6	P	0.01416	82.6	P	0.001953	62.4	P	0.010742	56.7	P	0.010742	MG1655_b1488 DB_XREF=PID:g1787763 SEG=NC_000913:-1560519,1561100 LEN=581 DEF=hypothetical protein
1768460_s_at	161.3	P	0.000244	92.5	P	0.000244	124.4	P	0.001221	198	P	0.000244	122.3	P	0.001221	121	P	0.000732	EDL933_Z2220 DB_XREF=GI:12515188 SEG=NC_002655:+2001483,2002748 LEN=1265 DEF=putative sensor kinase
1761786_s_at	141	P	0.000244	58.9	P	0.001953	97.7	P	0.000732	207.5	P	0.000244	120.7	P	0.000244	106.6	P	0.00293	MG1655_b1490 DB_XREF=PID:g1787766 SEG=NC_000913:-1563782,1565164 LEN=1382 DEF=orf, hypothetical protein
1765583_s_at	101.5	P	0.001221	90	P	0.023926	134.1	P	0.023926	89	P	0.01416	67.7	P	0.046143	73.4	P	0.046143	MG1655_b1491 DB_XREF=PID:g1787767 SEG=NC_000913:-1565528,1566847 LEN=1319 DEF=orf, hypothetical protein
1768165_s_at	91.9	P	0.00415	95.1	M	0.056152	138.4	P	0.018555	169.4	P	0.001221	148.5	P	0.018555	129.1	P	0.023926	MG1655_xasA_b1492 DB_XREF=PID:g1787768 SEG=NC_000913:-1566978,1568513 LEN=1535 DEF=acid sensitivity protein, putative transporter
1760545_s_at	29.6	P	0.000244	126.7	P	0.001953	106.5	P	0.000244	143	P	0.000244	133.6	P	0.000244	142	P	0.000244	MG1655_gadB_b1493 DB_XREF=PID:g1787769 SEG=NC_000913:-1568669,1570069 LEN=1400 DEF=glutamate decarboxylase isozyme
1764150_s_at	74.5	P	0.000244	65	P	0.000732	71.5	P	0.000244	114.7	P	0.000244	270.3	P	0.000244	316.8	P	0.000244	MG1655_pqqL_b1494 DB_XREF=PID:g1787770 SEG=NC_000913:-1570431,1573226 LEN=2795 DEF=putative zinc protease
1766186_s_at	23.5	P	0.023926	31.8	P	0.005859	49.6	P	0.001953	61.8	P	0.008057	127.7	P	0.000732	131.6	P	0.000732	MG1655_yddB_b1495 DB_XREF=PID:g1787771 SEG=NC_000913:-1573271,1575643 LEN=2372 DEF=orf, hypothetical protein
1768849_s_at	7.7	P	0.010742	18	P	0.017578	27.1	P	0.001953	43.9	P	0.000244	37.5	P	0.00415	29.1	P	0.023926	MG1655_yddA_b1496 DB_XREF=PID:g1787772 SEG=NC_000913:-1575681,1577366 LEN=1685 DEF=putative ATP-binding component of a transport system
1766140_s_at	16.8	P	0.030273	33.6	P	0.030273	46.8	A	0.067627	91.5	P	0.037598	55.8	P	0.037598	45.5	P	0.023926	MG1655_b1497 DB_XREF=PID:g1787774 SEG=NC_000913:-1577657,1578829 LEN=1172 DEF=putative enzyme
1768132_s_at	18.5	P	0.00415	19.5	P	0.010742	42.2	P	0.000732	79.8	P	0.000244	205.7	P	0.000244	150.2	P	0.000732	MG1655_b1498 DB_XREF=PID:g1787775 SEG=NC_000913:-1578866,1580581 LEN=1715 DEF=putative sulfatase
1768362_s_at	21.4	P	0.030273	33.2	P	0.001953	31.4	P	0.000732	113.5	P	0.000732	51.1	P	0.001953	33	P	0.001221	MG1655_b1499 DB_XREF=PID:g1787776 SEG=NC_000913:-1580950,1581711 LEN=761 DEF=putative ARAC-type regulatory protein
1768215_s_at	14.6	P	0.000244	30	P	0.000244	28.2	P	0.000244	50.3	P	0.000244	39	P	0.000244	19.5	P	0.000244	MG1655_b1500 DB_XREF=PID:g1787777 SEG=NC_000913:-1581786,1581983 LEN=197 DEF=orf, hypothetical protein
1765383_s_at	49	P	0.00415	44.8	P	0.023926	39.6	P	0.01416	66	P	0.001221	56.5	P	0.00293	36.5	P	0.037598	MG1655_b1501 DB_XREF=PID:g1787778 SEG=NC_000913:-1582231,1584510 LEN=2279 DEF=putative oxidoreductase, major subunit
1764290_s_at	8	P	0.001221	29.3	P	0.000244	23.8	P	0.00415	68.3	P	0.000244	36.9	P	0.000244	30.1	P	0.001953	MG1655_b1502 DB_XREF=PID:g1787779 SEG=NC_000913:-1584844,1585758 LEN=914 DEF=putative adhesin; similar to FimH protein
1768967_s_at	12.2	P	0.00293	25.1	P	0.001953	39.2	P	0.000244	68.7	P	0.000244	49	P	0.000732	29.1	P	0.000244	MG1655_b1503 DB_XREF=PID:g1787780 SEG=NC_000913:-1585817,1586320 LEN=503 DEF=putative fimbrial-like protein
1760594_s_at	17.2	P	0.001953	34.1	P	0.000244	59.4	P	0.000244	96.8	P	0.000244	63.9	P	0.000244	36	P	0.001221	MG1655_b1504 DB_XREF=PID:g1787781 SEG=NC_000913:-1586333,1586863 LEN=530 DEF=putative fimbrial-like protein
1761434_s_at	25.9	A	0.067627	52.2	P	0.037598	76	P	0.037598	125	P	0.00293	103.3	P	0.01416	81.4	P	0.046143	MG1655_b1505 DB_XREF=PID:g1787782 SEG=NC_000913:-1586877,1588025 LEN=1148 DEF=putative outer membrane protein
1764570_s_at	7.7	A	0.111572	13.1	A	0.095215	14.1	P	0.046143	22	P	0.000732	19.9	P	0.000732	14.5	P	0.005859	MG1655_b1506 DB_XREF=PID:g1787784 SEG=NC_000913:-1588381,1588560 LEN=179 DEF=orf, hypothetical protein
1764968_s_at	76	P	0.000244	91.2	P	0.000244	70.4	P	0.000244	103.3	P	0.000244	102.7	P	0.000244	88.8	P	0.000244	EDL933_hipA_Z2197 DB_XREF=GI:12515161 SEG=NC_002655:+1972050,1973072 LEN=1022 DEF=persistence to inhibition of murein or DNA biosynthesis, DNA-binding regulator
1761369_s_at	85	P	0.000244	91.5	P	0.000732	131.4	P	0.000732	130	P	0.000732	132.3	P	0.000732	121.7	P	0.001221	MG1655_hipB_b1508 DB_XREF=PID:g1787786 SEG=NC_000913:-1590200,1590466 LEN=266 DEF=persistence to inhibition of murein or DNA biosynthesis; regulatory protein
1765875_s_at	180.8	P	0.000732	78.6	P	0.00293	96.9	P	0.001221	214.1	P	0.000244	171	P	0.000732	147.3	P	0.001221	MG1655_b1509 DB_XREF=PID:g1787787 SEG=NC_000913:-1590689,1592089 LEN=1400 DEF=putative ATP-binding component of a transport system and adhesin protein
1764779_at	26.6	P	0.00415	22.4	P	0.005859	23.8	P	0.001221	55.3	P	0.000244	22.7	P	0.000244	31	P	0.005859	MG1655_ydeK_b1510 DB_XREF=PID:g1787788 SEG=NC_000913:-1592133,1596110 LEN=3977 DEF=orf, hypothetical protein
1768257_s_at	129.8	P	0.000732	107.7	P	0.001953	150.3	P	0.001221	263.4	P	0.000732	324	P	0.000732	287.5	P	0.000732	MG1655_ydeV_b1511 DB_XREF=PID:g1787789 SEG=NC_000913:-1596641,1598233 LEN=1592 DEF=putative kinase
1762354_s_at	34.8	P	0.001221	44.9	P	0.001221	59.2	P	0.00293	152.2	P	0.000732	194.8	P	0.000244	211.6	P	0.000244	MG1655_ydeW_b1512 DB_XREF=PID:g1787791 SEG=NC_000913:-1598312,1599265 LEN=953 DEF=putative transcriptional regulator, sorC family
1761389_s_at	38.5	P	0.037598	41.9	A	0.095215	75.9	A	0.080566	126	P	0.018555	90.8	A	0.067627	55.3	A	0.067627	MG1655_b1513 DB_XREF=PID:g1787792 SEG=NC_000913:+1599514,1601049 LEN=1535 DEF=putative ATP-binding component of a transport system
1761744_s_at	30.6	A	0.149658	37.9	P	0.046143	61.4	P	0.046143	81.7	P	0.037598	42.5	A	0.067627	59.5	A	0.19458	MG1655_ydeY_b1514 DB_XREF=PID:g1787793 SEG=NC_000913:+1601043,1602071 LEN=1028 DEF=putative transport system permease protein
1761065_s_at	39.1	P	0.037598	49.5	M	0.056152	61.9	M	0.056152	113.7	P	0.01416	83.4	M	0.056152	52.1	A	0.129639	MG1655_ydeZ_b1515 DB_XREF=PID:g1787794 SEG=NC_000913:+1602071,1603063 LEN=992 DEF=putative transport system permease protein
1759256_s_at	21.9	P	0.001221	23.1	P	0.023926	31.4	P	0.00293	55.9	P	0.000244	68.7	P	0.001221	39.4	P	0.001221	MG1655_b1516 DB_XREF=PID:g1787795 SEG=NC_000913:+1603075,1604097 LEN=1022 DEF=putative LACI-type transcriptional regulator
1767864_s_at	34.5	P	0.023926	30.7	P	0.018555	33.1	P	0.005859	87.9	P	0.000732	99.7	P	0.001953	74.3	P	0.00415	MG1655_yneB_b1517 DB_XREF=PID:g1787796 SEG=NC_000913:+1604124,1604999 LEN=875 DEF=putative aldolase
1760082_s_at	64.9	P	0.023926	58.7	P	0.023926	69.1	P	0.046143	175.4	P	0.01416	159.1	P	0.01416	137.6	P	0.01416	MG1655_b1518 DB_XREF=PID:g1787797 SEG=NC_000913:+1605023,1605313 LEN=290 DEF=orf, hypothetical protein
1762545_s_at	90.6	P	0.000732	64.6	P	0.000244	84.5	P	0.000732	141.5	P	0.000732	106	P	0.000732	69	P	0.001221	MG1655_b1519 DB_XREF=PID:g1787798 SEG=NC_000913:+1605370,1606128 LEN=758 DEF=hypothetical protein
1765352_s_at	218	P	0.000732	178.4	P	0.000732	247.6	P	0.000244	145	P	0.001953	93.9	P	0.00415	59.5	P	0.01416	MG1655_b1520 DB_XREF=PID:g1787799 SEG=NC_000913:-1606132,1607097 LEN=965 DEF=orf, hypothetical protein
1767064_s_at	132.6	P	0.000244	57.5	P	0.008057	101.4	P	0.008057	216.9	P	0.001221	111.2	P	0.001953	88.9	P	0.018555	MG1655_uxaB_b1521 DB_XREF=PID:g1787800 SEG=NC_000913:-1607253,1608704 LEN=1451 DEF=altronate oxidoreductase
1760165_s_at	361.6	P	0.000244	77.9	P	0.000244	105.1	P	0.001221	150.9	P	0.000244	75.4	P	0.000244	80.3	P	0.000244	MG1655_b1522 DB_XREF=PID:g1787802 SEG=NC_000913:-1608931,1609878 LEN=947 DEF=orf, hypothetical protein
1762860_s_at	1196	P	0.000244	191.9	P	0.001953	256	P	0.005859	214.4	P	0.00293	132.4	P	0.010742	106.4	P	0.023926	CFT073_yneG_c1946 DB_XREF=26247801 SEG=NC_004431:-1788874,1789233 LEN=359 DEF=Hypothetical protein yneG
1763406_s_at	2106.2	P	0.000244	481.3	P	0.008057	470.5	P	0.005859	390	P	0.008057	270.3	P	0.023926	259.2	P	0.018555	MG1655_yneH_b1524 DB_XREF=PID:g1787804 SEG=NC_000913:-1610349,1611275 LEN=926 DEF=putative glutaminase
1768279_s_at	2573.1	P	0.000244	392.1	P	0.000244	340.8	P	0.000732	318	P	0.01416	301.2	P	0.018555	319.4	P	0.018555	MG1655_b1525 DB_XREF=PID:g1787805 SEG=NC_000913:-1611339,1612751 LEN=1412 DEF=putative aldehyde dehydrogenase
1762052_s_at	251.6	P	0.001221	73.4	P	0.010742	102.3	P	0.001953	168.6	P	0.001221	78	P	0.01416	56.6	P	0.01416	MG1655_yneJ_b1526 DB_XREF=PID:g1787806 SEG=NC_000913:+1612828,1613709 LEN=881 DEF=putative transcriptional regulator LYSR-type
1766137_s_at	54.7	P	0.000732	43.4	P	0.018555	53.5	P	0.00415	97.7	P	0.000732	52.4	P	0.010742	43.1	P	0.018555	EDL933_Z2176 DB_XREF=GI:12515135 SEG=NC_002655:-1947510,1948298 LEN=788 DEF=orf, hypothetical protein
1760766_s_at	419.2	P	0.000244	275.5	P	0.000244	388.1	P	0.000244	195.5	P	0.000244	119.9	P	0.000732	76.9	P	0.00415	MG1655_b1528 DB_XREF=PID:g1787808 SEG=NC_000913:+1615052,1616242 LEN=1190 DEF=sugar efflux transporter; L-arabinose and isopropyl-b-D-thiogalactopyranoside exporter protein
1761055_s_at	366.8	P	0.000244	346.4	P	0.000244	390.6	P	0.000244	316.9	P	0.000244	251.1	P	0.000244	286	P	0.000732	EDL933_ydeB_Z2172 DB_XREF=GI:12515132 SEG=NC_002655:+1945151,1945816 LEN=665 DEF=orf, hypothetical protein
1763543_s_at	745	P	0.000244	256.2	P	0.000244	234.1	P	0.000244	206.4	P	0.000732	184.6	P	0.001221	173.7	P	0.001953	MG1655_marR_b1530 DB_XREF=PID:g1787810 SEG=NC_000913:+1617201,1617578 LEN=377 DEF=multiple antibiotic resistance protein; repressor of mar operon
1760938_s_at	727.6	P	0.000244	414.9	P	0.000244	367.4	P	0.000244	221	P	0.000732	192.1	P	0.005859	213.2	P	0.00293	MG1655_marA_b1531 DB_XREF=PID:g1787811 SEG=NC_000913:+1617592,1617981 LEN=389 DEF=multiple antibiotic resistance; transcriptional activator of defense systems
1760768_s_at	93.1	P	0.000732	63.9	P	0.01416	94.6	P	0.001953	60.6	P	0.001221	52.4	A	0.067627	59.7	A	0.080566	MG1655_marB_b1532 DB_XREF=PID:g1787812 SEG=NC_000913:+1618013,1618231 LEN=218 DEF=multiple antibiotic resistance protein
1760872_s_at	577	P	0.000244	357.5	P	0.000244	449	P	0.000244	769.7	P	0.000244	604.2	P	0.000244	585.8	P	0.000244	MG1655_b1533 DB_XREF=PID:g1787813 SEG=NC_000913:-1618262,1619062 LEN=800 DEF=amino acid metabolite efflux pump
1759260_s_at	52.3	P	0.00293	22.7	M	0.056152	22.1	A	0.080566	95.1	P	0.000732	46.2	P	0.001953	33.1	P	0.023926	MG1655_b1534 DB_XREF=PID:g1787815 SEG=NC_000913:+1619356,1620543 LEN=1187 DEF=putative transport protein
1762245_s_at	355	P	0.000244	69.8	P	0.001221	108.8	P	0.000732	322.1	P	0.000244	92.8	P	0.000244	122.9	P	0.001221	MG1655_ydeH_b1535 DB_XREF=PID:g1787816 SEG=NC_000913:-1620984,1621874 LEN=890 DEF=orf, hypothetical protein
1768326_s_at	65.2	P	0.001221	67.6	P	0.000732	88.8	P	0.000244	149.5	P	0.000244	79.5	P	0.001953	78	P	0.00293	MG1655_ydeI_b1536 DB_XREF=PID:g1787817 SEG=NC_000913:-1622129,1622521 LEN=392 DEF=orf, hypothetical protein
1765113_s_at	54.1	P	0.000732	47.3	P	0.00415	59.7	P	0.00293	98.4	P	0.00293	59.3	P	0.008057	46.6	P	0.010742	MG1655_ydeJ_b1537 DB_XREF=PID:g1787818 SEG=NC_000913:+1622797,1623315 LEN=518 DEF=orf, hypothetical protein
1759562_s_at	449.9	P	0.000244	363.2	P	0.000244	285.5	P	0.000244	510.7	P	0.000244	598.8	P	0.000244	672	P	0.000244	MG1655_dcp_b1538 DB_XREF=PID:g1787819 SEG=NC_000913:-1623359,1625404 LEN=2045 DEF=dipeptidyl carboxypeptidase II
1760600_s_at	891.7	P	0.000732	921.4	P	0.000732	949	P	0.000244	923.8	P	0.000244	920.5	P	0.000732	1076	P	0.000732	MG1655_ydfG_b1539 DB_XREF=PID:g1787820 SEG=NC_000913:+1625541,1626287 LEN=746 DEF=putative oxidoreductase
1766864_s_at	876.9	P	0.001221	715.8	P	0.00415	678.3	P	0.030273	566.6	P	0.008057	393.2	P	0.046143	339.9	P	0.046143	MG1655_ydfH_b1540 DB_XREF=PID:g1787821 SEG=NC_000913:+1626376,1627062 LEN=686 DEF=orf, hypothetical protein
1767888_s_at	810.7	P	0.000244	1040.6	P	0.000244	1022.7	P	0.000244	418.9	P	0.000244	276.4	P	0.000244	277.6	P	0.000244	MG1655_b1541 DB_XREF=PID:g1787822 SEG=NC_000913:+1627239,1627442 LEN=203 DEF=orf, hypothetical protein
1762998_s_at	51.5	P	0.000244	50.9	P	0.00415	70.1	P	0.000732	116.5	P	0.001953	62.7	P	0.008057	50.9	P	0.010742	CFT073_c1968 DB_XREF=26247823 SEG=NC_004431:-1810629,1812089 LEN=1460 DEF=Hypothetical oxidoreductase ydfI
1767262_s_at	112	P	0.001221	45.6	P	0.000732	63.5	P	0.000732	152.8	P	0.000244	90.5	P	0.001221	65.1	P	0.001221	MG1655_b1543 DB_XREF=PID:g1787824 SEG=NC_000913:-1629026,1630309 LEN=1283 DEF=putative transport protein
1762163_at	20.5	P	0.037598	14.1	A	0.334473	12.2	A	0.171387	38.1	P	0.001953	28.1	P	0.037598	17.4	A	0.219482	MG1655_b1547 DB_XREF=PID:g1787829 SEG=NC_000913:-1632909,1633871 LEN=962 DEF=hypothetical protein
1763909_s_at	29.1	P	0.000244	36.5	P	0.000244	42.9	P	0.000732	51.7	P	0.000244	41.5	P	0.000244	32.7	P	0.000244	MG1655_ydfO_b1549 DB_XREF=PID:g1787831 SEG=NC_000913:+1635056,1635481 LEN=425 DEF=orf, hypothetical protein
1765336_s_at	35.1	P	0.001953	72.5	P	0.001953	52.7	P	0.001953	50.8	P	0.001953	77	P	0.001953	45.9	P	0.001953	MG1655_b1550 DB_XREF=PID:g1787832 SEG=NC_000913:-1635633,1635809 LEN=176 DEF=hypothetical protein
1767354_at	1102.7	P	0.000244	414.8	P	0.000732	494.5	P	0.000244	404.3	P	0.000244	230.6	P	0.000732	174.8	P	0.00415	MG1655_b1551 DB_XREF=PID:g1787833 SEG=NC_000913:-1635978,1636169 LEN=191 DEF=orf, hypothetical protein
1760599_s_at	3214	P	0.000977	1451.3	P	0.000977	2476.9	P	0.000977	3217.2	P	0.000977	1483.9	P	0.000977	1140.1	P	0.000977	MG1655_cspI_b1552 DB_XREF=PID:g1787834 SEG=NC_000913:-1636479,1636691 LEN=212 DEF=cold shock-like protein
1765303_at	255.3	P	0.000244	53.3	P	0.001221	69.5	P	0.000244	133.2	P	0.000244	44.4	P	0.001221	30.5	P	0.000244	MG1655_b1553 DB_XREF=PID:g1787835 SEG=NC_000913:-1637054,1637551 LEN=497 DEF=orf, hypothetical protein
1768176_at	256.9	P	0.00293	70.8	A	0.129639	72.6	P	0.046143	119.4	P	0.008057	63.7	A	0.149658	63.2	A	0.129639	MG1655_b1554 DB_XREF=PID:g1787836 SEG=NC_000913:-1637548,1638081 LEN=533 DEF=putative lysozyme
1768705_at	322.5	P	0.000244	80.8	P	0.01416	100.8	P	0.010742	136.8	P	0.001221	114	P	0.008057	90.1	P	0.023926	MG1655_b1555 DB_XREF=PID:g1787837 SEG=NC_000913:-1638078,1638389 LEN=311 DEF=orf, hypothetical protein
1762879_at	212.3	P	0.001953	42.7	P	0.00293	88.7	P	0.001953	101.5	P	0.000732	41	P	0.01416	29.2	P	0.00293	MG1655_b1556 DB_XREF=PID:g1787838 SEG=NC_000913:-1638394,1638684 LEN=290 DEF=hypothetical protein
1762932_s_at	5311.3	P	0.000244	7224.5	P	0.000244	5840	P	0.000244	6162.4	P	0.000244	5441.1	P	0.000244	5238	P	0.000244	MG1655_cspB_b1557 DB_XREF=PID:g1787839 SEG=NC_000913:-1639363,1639578 LEN=215 DEF=CspB
1766439_s_at	1476.2	P	0.000244	985	P	0.000244	1279.2	P	0.000244	466.6	P	0.000732	399.6	P	0.000244	314.6	P	0.000732	MG1655_cspF_b1558 DB_XREF=PID:g1787840 SEG=NC_000913:+1639879,1640091 LEN=212 DEF=CspF
1759205_at	83.4	P	0.000732	51.7	P	0.00293	61	P	0.000732	107.9	P	0.000732	60.8	P	0.001953	45.8	P	0.01416	MG1655_b1559 DB_XREF=PID:g1787842 SEG=NC_000913:-1640513,1641295 LEN=782 DEF=hypothetical protein
1763158_at	76.5	P	0.008057	35.3	A	0.067627	58.7	P	0.01416	130.1	P	0.018555	80.4	P	0.01416	47.9	M	0.056152	MG1655_b1560 DB_XREF=PID:g1787843 SEG=NC_000913:-1641279,1642367 LEN=1088 DEF=orf, hypothetical protein
1761308_at	291	P	0.000244	127.5	P	0.000244	172.8	P	0.000244	243.1	P	0.000244	214.2	P	0.000244	185.3	P	0.000244	MG1655_rem_b1561 DB_XREF=PID:g1787844 SEG=NC_000913:-1642675,1642926 LEN=251 DEF=orf, hypothetical protein
1763857_s_at	138.2	P	0.000244	85.3	P	0.000244	129.6	P	0.000244	189.5	P	0.000244	147.4	P	0.000244	103.5	P	0.000244	MG1655_hokD_b1562 DB_XREF=PID:g1787845 SEG=NC_000913:-1643143,1643298 LEN=155 DEF=polypeptide destructive to membrane potential
1761089_at	1057.1	P	0.000244	687.8	P	0.000244	873.4	P	0.000244	1204.6	P	0.000244	929.9	P	0.000244	905.6	P	0.000244	MG1655_relE_b1563 DB_XREF=PID:g1787846 SEG=NC_000913:-1643370,1643657 LEN=287 DEF=orf, hypothetical protein
1760110_at	826.4	P	0.000244	599.3	P	0.000732	395.1	P	0.000244	884.9	P	0.000732	632.7	P	0.000244	718.1	P	0.000244	MG1655_relB_b1564 DB_XREF=PID:g1787847 SEG=NC_000913:-1643657,1643896 LEN=239 DEF=negative regulator of translation
1762092_at	99.3	P	0.000244	47.5	P	0.000732	77.3	P	0.000244	111.7	P	0.000244	76.6	P	0.000244	56.7	P	0.000244	MG1655_b1565 DB_XREF=PID:g1787848 SEG=NC_000913:+1643921,1644226 LEN=305 DEF=orf, hypothetical protein
1761538_at	101.4	P	0.000244	1689	P	0.000244	1903.7	P	0.000244	685.5	P	0.000244	4486.5	P	0.000244	4681.4	P	0.000244	MG1655_flxA_b1566 DB_XREF=PID:g1787849 SEG=NC_000913:+1644429,1644761 LEN=332 DEF=orf, hypothetical protein
1767538_at	40.7	P	0.000244	56.8	P	0.000244	91.6	P	0.000244	160.6	P	0.000244	116.8	P	0.000244	69.2	P	0.000244	MG1655_b1567 DB_XREF=PID:g1787850 SEG=NC_000913:-1645198,1645347 LEN=149 DEF=orf, hypothetical protein
1767166_at	28.6	P	0.037598	34.9	P	0.023926	57.3	P	0.010742	61.3	P	0.018555	56.8	P	0.037598	53.5	A	0.067627	MG1655_b1568 DB_XREF=PID:g1787851 SEG=NC_000913:-1645370,1645660 LEN=290 DEF=orf, hypothetical protein
1761562_at	18.3	P	0.01416	27.2	P	0.00293	61.3	P	0.005859	67	P	0.000244	38.2	P	0.001953	28.1	P	0.023926	MG1655_dicC_b1569 DB_XREF=PID:g1787852 SEG=NC_000913:-1645644,1645874 LEN=230 DEF=regulator of dicB
1768495_at	2981.9	P	0.000244	3090.6	P	0.000244	2126	P	0.000732	1548.8	P	0.000732	1860.5	P	0.000732	1673.4	P	0.000732	MG1655_dicA_b1570 DB_XREF=PID:g1787853 SEG=NC_000913:+1645958,1646365 LEN=407 DEF=regulator of dicB
1765317_s_at	199.9	P	0.000244	188.6	P	0.000244	208.9	P	0.000244	289.7	P	0.000244	233.6	P	0.000244	268.1	P	0.000732	MG1655_ydfA_b1571 DB_XREF=PID:g1787854 SEG=NC_000913:+1646532,1646687 LEN=155 DEF=orf, hypothetical protein
1760318_s_at	55.5	P	0.000732	47.3	P	0.000244	73.6	P	0.001953	90.8	P	0.000732	57.8	P	0.000732	55.6	P	0.005371	CFT073_ydfB_c1408 DB_XREF=26247277 SEG=NC_004431:-1333160,1333330 LEN=170 DEF=Hypothetical protein ydfB
1761843_s_at	45.9	P	0.000732	34.8	P	0.001221	48.2	P	0.001221	67.4	P	0.000244	29.5	P	0.000244	34.7	P	0.00415	MG1655_ydfC_b1573 DB_XREF=PID:g1787856 SEG=NC_000913:+1646847,1647065 LEN=218 DEF=orf, hypothetical protein
1765052_x_at	66.4	P	0.00293	66.6	P	0.01416	112.6	P	0.000244	181.3	P	0.000732	116.4	P	0.001953	84.5	P	0.008057	MG1655_dicF_b1574 SEG=NC_000913:+1647406,1647458 LEN=52 DEF=DicF antisense RNA, inhibits ftsZ translation
1765106_s_at	57.8	P	0.000244	64.4	P	0.008057	62.7	P	0.010742	117.1	P	0.000244	91.1	P	0.00293	53.9	P	0.00293	MG1655_dicB_b1575 DB_XREF=PID:g1787857 SEG=NC_000913:+1647633,1647821 LEN=188 DEF=inhibition of cell division
1765329_s_at	87.4	P	0.000244	74	P	0.000244	213.1	P	0.000244	375.3	P	0.000244	169.2	P	0.000244	82	P	0.001953	MG1655_ydfD_b1576 DB_XREF=PID:g1787858 SEG=NC_000913:+1647818,1648009 LEN=191 DEF=orf, hypothetical protein
1767247_at	76.2	P	0.037598	82.7	A	0.129639	76.9	A	0.129639	143.5	P	0.010742	92.8	P	0.023926	61.2	A	0.111572	MG1655_ydfE_b1577 DB_XREF=PID:g1787859 SEG=NC_000913:+1648102,1649022 LEN=920 DEF=orf, hypothetical protein
1768886_at	32.8	P	0.01416	25.6	A	0.080566	42.8	P	0.023926	65.1	P	0.000244	33.3	P	0.008057	28.1	P	0.000244	MG1655_b1579 DB_XREF=PID:g1787861 SEG=NC_000913:+1649536,1650732 LEN=1196 DEF=putative transposase
1768787_s_at	36.3	P	0.005859	40.8	P	0.005859	47.4	P	0.010742	688.1	P	0.000244	71.6	P	0.00415	48.2	P	0.00293	MG1655_rspB_b1580 DB_XREF=PID:g1787863 SEG=NC_000913:-1650920,1651939 LEN=1019 DEF=starvation sensing protein
1767630_s_at	48.4	A	0.219482	37.9	A	0.171387	38	A	0.111572	712.7	P	0.00293	59.2	A	0.246094	42.2	A	0.219482	MG1655_rspA_b1581 DB_XREF=PID:g1787864 SEG=NC_000913:-1651951,1653165 LEN=1214 DEF=starvation sensing protein
1760864_s_at	483.8	P	0.000244	190.7	P	0.000244	353.5	P	0.000244	475.4	P	0.000244	267.2	P	0.000244	202.4	P	0.000244	MG1655_b1582 DB_XREF=PID:g1787865 SEG=NC_000913:-1653371,1653697 LEN=326 DEF=orf, hypothetical protein
1762178_s_at	1622.3	P	0.000244	1251.5	P	0.000244	1592.9	P	0.000244	1789.6	P	0.000244	1867.2	P	0.000244	1850.7	P	0.000244	MG1655_b1583 DB_XREF=PID:g1787866 SEG=NC_000913:+1653832,1654173 LEN=341 DEF=orf, hypothetical protein
1768708_s_at	950.9	P	0.000244	940.2	P	0.000244	1128	P	0.000244	982.4	P	0.000244	1003.3	P	0.000244	978.8	P	0.000244	MG1655_speG_b1584 DB_XREF=PID:g1787867 SEG=NC_000913:+1654208,1654768 LEN=560 DEF=spermidine N1-acetyltransferase
1769059_s_at	432.6	P	0.000244	236.7	P	0.000244	418.5	P	0.000244	548.2	P	0.000244	372.8	P	0.000244	403.1	P	0.000244	MG1655_ynfC_b1585 DB_XREF=PID:g1787868 SEG=NC_000913:-1654771,1655517 LEN=746 DEF=orf, hypothetical protein
1762973_s_at	201.8	P	0.000244	101.6	P	0.000244	119.2	P	0.000244	262.3	P	0.000244	200.5	P	0.000244	173	P	0.000244	EDL933_Z2573 DB_XREF=GI:12515561 SEG=NC_002655:+2332650,2332958 LEN=308 DEF=orf, hypothetical protein
1760079_s_at	120	P	0.000244	95.9	P	0.000244	77.3	P	0.001953	68.3	P	0.000244	68.8	P	0.010742	75.8	P	0.00293	MG1655_b1587 DB_XREF=PID:g1787870 SEG=NC_000913:+1656093,1658519 LEN=2426 DEF=putative oxidoreductase major subunit
1764834_s_at	112.3	P	0.000732	104.7	P	0.000244	91.2	P	0.000244	131.3	P	0.000732	129.1	P	0.001953	87.1	P	0.000732	MG1655_b1588 DB_XREF=PID:g1787871 SEG=NC_000913:+1658577,1661003 LEN=2426 DEF=putative oxidoreductase major subunit
1760438_s_at	103.3	P	0.000244	48.4	P	0.018555	67.8	P	0.030273	106.6	P	0.000732	45.8	P	0.023926	66	P	0.00415	MG1655_b1589 DB_XREF=PID:g1787872 SEG=NC_000913:+1661014,1661631 LEN=617 DEF=putative oxidoreductase Fe-S subunit
1762268_s_at	287.1	P	0.000244	159.9	P	0.001221	177.2	P	0.018555	315.5	P	0.005859	147.7	P	0.023926	141.1	P	0.037598	MG1655_b1590 DB_XREF=PID:g1787873 SEG=NC_000913:+1661633,1662487 LEN=854 DEF=putative DMSO reductase anchor subunit
1766250_s_at	707.1	P	0.000244	511.4	P	0.000244	492.5	P	0.000244	589.1	P	0.000244	572.1	P	0.000244	507.3	P	0.000244	MG1655_b1591 DB_XREF=PID:g1787874 SEG=NC_000913:+1662521,1663144 LEN=623 DEF=putative oxidoreductase component
1766291_s_at	199.9	P	0.000244	128.6	P	0.00415	109.8	P	0.000244	157.1	P	0.000244	85	P	0.001953	86.6	P	0.001953	MG1655_b1592 DB_XREF=PID:g1787876 SEG=NC_000913:+1663279,1664595 LEN=1316 DEF=putative chloride channel
1767479_s_at	933.2	P	0.000244	888.2	P	0.000244	899.4	P	0.000244	391.9	P	0.000244	360.1	P	0.000244	357	P	0.000244	MG1655_b1593 DB_XREF=PID:g1787877 SEG=NC_000913:-1664548,1665255 LEN=707 DEF=hypothetical protein
1760394_s_at	365.3	P	0.005859	255.7	P	0.01416	273.8	P	0.018555	852.4	P	0.000732	723.5	P	0.008057	848.6	P	0.005859	MG1655_mlc_b1594 DB_XREF=PID:g1787878 SEG=NC_000913:-1665368,1666588 LEN=1220 DEF=putative NAGC-like transcriptional regulator
1761440_s_at	86	P	0.000244	86.7	P	0.000732	109.5	P	0.000244	132	P	0.000244	108.3	P	0.001221	109.6	P	0.000732	MG1655_ynfL_b1595 DB_XREF=PID:g1787879 SEG=NC_000913:-1666723,1667616 LEN=893 DEF=putative transcriptional regulator LYSR-type
1763749_s_at	166.2	P	0.000244	300.2	P	0.000244	291.2	P	0.000244	140.4	P	0.000244	96.4	P	0.000732	111.7	P	0.000732	MG1655_ynfM_b1596 DB_XREF=PID:g1787880 SEG=NC_000913:+1667723,1668976 LEN=1253 DEF=putative transport protein
1767701_s_at	61.8	A	0.171387	58.6	A	0.334473	141.4	A	0.366211	208.4	A	0.111572	574.6	A	0.067627	556.4	P	0.046143	MG1655_asr_b1597 DB_XREF=PID:g1787881 SEG=NC_000913:+1669373,1669708 LEN=335 DEF=acid shock protein
1759761_s_at	395.5	P	0.000244	206.9	P	0.000244	321	P	0.000244	426.8	P	0.000244	288.8	P	0.000244	301.8	P	0.000244	SAKAI_ECs2304 DB_XREF=15831558 SEG=NC_002695:+2271762,2272286 LEN=524 DEF=hypothetical protein
1763040_s_at	339.9	P	0.000244	67.1	P	0.008057	146.5	P	0.008057	169.6	P	0.001953	97.8	P	0.010742	65.7	M	0.056152	MG1655_b1599 DB_XREF=PID:g1787883 SEG=NC_000913:-1670844,1671173 LEN=329 DEF=possible chaperone
1759134_s_at	720.4	P	0.000244	131	P	0.000244	342.4	P	0.000244	450.4	P	0.000244	235.9	P	0.000244	134.2	P	0.000244	MG1655_b1600 DB_XREF=PID:g1787884 SEG=NC_000913:-1671160,1671525 LEN=365 DEF=possible chaperone
1761399_s_at	129.3	P	0.005859	100.7	P	0.01416	110.7	P	0.030273	184.1	P	0.01416	87	M	0.056152	82.9	A	0.080566	MG1655_b1601 DB_XREF=PID:g1787885 SEG=NC_000913:+1671937,1672971 LEN=1034 DEF=putative transport protein
1765850_s_at	711.3	P	0.000244	422.2	P	0.00293	511	P	0.001221	1204.2	P	0.000244	2352.1	P	0.000244	2423.7	P	0.000244	MG1655_pntB_b1602 DB_XREF=PID:g1787886 SEG=NC_000913:-1672996,1674384 LEN=1388 DEF=pyridine nucleotide transhydrogenase, beta subunit
1766964_s_at	760.6	P	0.000244	452.1	P	0.000244	559	P	0.000244	1230.1	P	0.000244	1978.7	P	0.000244	2317.9	P	0.000244	MG1655_pntA_b1603 DB_XREF=PID:g1787887 SEG=NC_000913:-1674395,1675927 LEN=1532 DEF=pyridine nucleotide transhydrogenase, alpha subunit
1762383_s_at	1006.4	P	0.000244	652.5	P	0.000244	867.7	P	0.000244	1172.8	P	0.000244	1275.3	P	0.000244	1269.8	P	0.000244	MG1655_b1604 DB_XREF=PID:g1787889 SEG=NC_000913:+1676451,1677395 LEN=944 DEF=orf, hypothetical protein
1760932_s_at	643.2	P	0.000244	121.4	P	0.000244	174.1	P	0.000244	128.6	P	0.000244	59.6	P	0.000244	66.9	P	0.000732	MG1655_b1605 DB_XREF=PID:g1787890 SEG=NC_000913:+1677581,1678963 LEN=1382 DEF=putative arginineornithine antiporter
1766734_s_at	495.1	P	0.000244	249.3	P	0.000244	223.5	P	0.000244	265.6	P	0.000244	299.1	P	0.000244	259.6	P	0.000244	MG1655_ydgB_b1606 DB_XREF=PID:g1787891 SEG=NC_000913:+1679000,1679722 LEN=722 DEF=putative oxidoreductase
1764973_s_at	258.4	P	0.000732	211.4	P	0.001953	319.5	P	0.000732	600.1	P	0.000244	365.9	P	0.000732	365.7	P	0.000732	MG1655_ydgC_b1607 DB_XREF=PID:g1787892 SEG=NC_000913:-1679719,1680054 LEN=335 DEF=orf, hypothetical protein
1768956_s_at	563.2	P	0.000244	288.2	P	0.00293	304.8	P	0.000244	770.1	P	0.000244	1022.3	P	0.000732	1013.6	P	0.000244	MG1655_rstA_b1608 DB_XREF=PID:g1787893 SEG=NC_000913:+1680174,1680902 LEN=728 DEF=response transcriptional regulatory protein (RstB sensor)
1768759_s_at	156.4	P	0.001953	100.5	P	0.018555	118.7	P	0.01416	286.3	P	0.000732	465.7	P	0.000732	440.9	P	0.000732	MG1655_rstB_b1609 DB_XREF=PID:g1787894 SEG=NC_000913:+1680906,1682207 LEN=1301 DEF=sensor histidine protein kinase (RstA regulator)
1759546_s_at	250.1	P	0.000244	199.1	P	0.000244	306.8	P	0.000244	273.5	P	0.000244	323.8	P	0.000244	290.8	P	0.000244	MG1655_tus_b1610 DB_XREF=PID:g1787895 SEG=NC_000913:+1682283,1683212 LEN=929 DEF=DNA-binding protein; inhibition of replication at Ter sites
1768359_s_at	178.7	P	0.000732	207.3	P	0.000732	215.6	P	0.000244	823.3	P	0.000244	483.7	P	0.000244	431.8	P	0.000244	MG1655_fumC_b1611 DB_XREF=PID:g1787896 SEG=NC_000913:-1683209,1684612 LEN=1403 DEF=fumarase C= fumarate hydratase Class II; isozyme
1767184_s_at	284.2	P	0.000732	723.4	P	0.000244	643.3	P	0.000244	1942.5	P	0.000244	1751	P	0.000244	2001	P	0.000244	MG1655_fumA_b1612 DB_XREF=PID:g1787897 SEG=NC_000913:-1684755,1686401 LEN=1646 DEF=fumarase A = fumarate hydratase Class I; aerobic isozyme
1765347_s_at	867.1	P	0.001221	1013.5	P	0.001221	861.1	P	0.00415	875.5	P	0.001221	829.7	P	0.001221	863.1	P	0.00415	MG1655_manA_b1613 DB_XREF=PID:g1787899 SEG=NC_000913:+1686600,1687775 LEN=1175 DEF=mannose-6-phosphate isomerase
1767805_s_at	696.5	P	0.000244	905.8	P	0.000244	1070.5	P	0.000244	765.2	P	0.000244	1094.6	P	0.000244	1137.3	P	0.000244	MG1655_ydgA_b1614 DB_XREF=PID:g1787900 SEG=NC_000913:+1687876,1689384 LEN=1508 DEF=orf, hypothetical protein
1767808_s_at	41.1	P	0.008057	17.6	P	0.037598	47.1	P	0.008057	69	P	0.000732	44.5	P	0.018555	35.5	A	0.149658	MG1655_uidC_b1615 DB_XREF=PID:g1787901 SEG=NC_000913:-1689610,1690863 LEN=1253 DEF=membrane-associated protein
1766118_s_at	61.9	P	0.010742	49	P	0.005859	78.7	P	0.001953	154.5	P	0.000244	81.3	P	0.000244	65.7	P	0.000244	MG1655_uidB_b1616 DB_XREF=PID:g1787902 SEG=NC_000913:-1690914,1692287 LEN=1373 DEF=glucuronide permease
1766847_s_at	747.1	P	0.000732	926.3	P	0.000244	1177	P	0.000732	833.6	P	0.000732	699.1	P	0.000732	642	P	0.000732	MG1655_uidR_b1618 DB_XREF=PID:g1787904 SEG=NC_000913:-1694486,1695076 LEN=590 DEF=repressor for uid operon
1767109_s_at	192.4	P	0.000244	155.4	P	0.000732	308.3	P	0.000244	213.2	P	0.000244	180.4	P	0.000244	204.5	P	0.000732	CFT073_hdhA_c2011 DB_XREF=26247866 SEG=NC_004431:-1857794,1858561 LEN=767 DEF=7-alpha-hydroxysteroid dehydrogenase
[truncated: 8,480 more rows]
